# Supplementary material
Source: PubMed Central journal article supplement (PMC3578171)
Supplement: NIHMS415884-supplement-01.pdf [file NIHMS415884-supplement-01.pdf]

```

FEATURES
    misc_feature 223..235
                  /note="transcription start site"
    misc_feature 416..1036
                  /note="Capsid"
    misc_feature 1037..1114
                  /note="Spacer"
    misc_feature 1115..1288
                  /note="Nucleocapsid"
    misc_feature 343..350
                  /note="5' PBS"
    misc_feature 274..340
                  /note="U5"
    misc_feature 223..273
                  /note="R"
    misc_feature 1..222
                  /note="U3"
    misc_feature 5012..5233
                  /note="U3"
    misc_feature 5234..5284
                  /note="R"
    misc_feature 5285..5351
                  /note="U5"
    misc_feature 4991..5011
                  /note="PPT"
    misc_feature 1289..5057
                  /note="Pol"
    CDS           5275..5277
                  /note=""
                  /translation="N"
    CDS           5249..5252
                  /note=""
                  /translation="E"
    CDS           5282..5284
                  /note=""
                  /translation="Y"
    misc_feature 5169..5182
                  /note="3' PBSA"
    misc_feature 5187..5196
                  /note="3' PBS B"
    CDS           5263..5265
                  /note=""
                  /translation="N"
    source       1..5351
                  /dnas_title="Ty3 DNA full length element with features
                  annotated"

```

```

ORIGIN
    1 TGTTGTATCT CAAAATGAGA TATGTCAGTA TGACAATACG TCACCCTGAA CGTTCATAAA
    61 ACACATATGA AACAAACCTTA TAACAAAACG AACAAACATGA GACAAAACCC GACCTTCCCT
    121 AGCTGAACTA CCCAAAGTAT AAATGCCTGA ACAATTAGTT TAGATCCGAG ATTCCGCGCT
    181 TCCACCACTT AGTATGATTC ATATTTTATA TAATATATAA GATAAGTAAC ATTCCGTGAA
    241 TTAATCTGAT AACTGTTTTT GACAACTGGT TACTTCCCTA AGACTGTTTA TATTAGGATT
    301 GTCAAGACAC TCCGGTATTA CTCGAGCCCG TAATACAACA CCTGGTAGCG TTAAAGGTTA

```

|      |            |             |             |             |             |            |
|------|------------|-------------|-------------|-------------|-------------|------------|
| 361  | CTAATTGTTT | AAACGAACCA  | TCGAAAAGCC  | GAACCTAGCT  | ACACCACACC  | CCAGTATGAG |
| 421  | CTTTATGGAT | CAAATCCCAG  | GAGGAGGAAA  | TTATCCAAAA  | CTCCCAGTAG  | AATGCCTTCC |
| 481  | TAACCTCCCG | ATCCAACCAT  | CTTTGACCTT  | CAGAGGTAGA  | AATGACTCGC  | ATAAACTGAA |
| 541  | AAACTTTATC | TCCGAAATAA  | TGTTAAACAT  | GTCTATGATA  | TCTTGGCCGA  | ATGATGCCAG |
| 601  | TCGTATTGTG | TACTGCAGAA  | GACATTTATT  | AAACCCCGCT  | GCTCAGTGGG  | CTAATGACTT |
| 661  | TGTACAAGAA | CAAGGTATAC  | TTGAAATAAC  | ATTTCGACACA | TTCATACAAG  | GATTATATCA |
| 721  | GCATTTCTAT | AAGCCACCAG  | ATATCAATAA  | AATCTTTAAT  | GCAATCACGC  | AACTTTCGGA |
| 781  | AGCTAAACTT | GGTATTGAGC  | GTCTCAACCA  | ACGATTCAGA  | AAGATTTGGG  | ACAGAATGCC |
| 841  | ACCAGACTTC | ATGACCGAAA  | AAGCTGCCAT  | AATGACATAT  | ACTAGGCTAT  | TGACAAAGGA |
| 901  | AACCTATAAT | ATTGTCAGAA  | TGCACAAACC  | AGAGACATTA  | AAAGACGCCA  | TGGAAGAGGC |
| 961  | TTACCAGACA | ACTGCACTAA  | CTGAAAGATT  | CTTCCCAGGA  | TTCGAACTTG  | ATGCTGATGG |
| 1021 | AGACACTATC | ATCGGTGCCA  | CAACCCACTT  | ACAAGAAGAA  | TACGACTCTG  | ACTATGATTC |
| 1081 | AGAAGATAAT | CTGACCCAGA  | ATGGATACGT  | CCATACCGTA  | AGGACAAGAA  | GATCTTACAA |
| 1141 | TAAACCAATG | TCAAATCATC  | GAAACAGGAG  | AAATAACAAC  | CCATCTAGAG  | AAGAATGTAT |
| 1201 | AAAAAATCGG | CTATGCTTCT  | ATTGTAAGAA  | AGAGGGACAT  | CGCCTGAACG  | AATGTAGAGC |
| 1261 | ACGTAAGGCG | AGTTCTAACC  | GATCTTGAAC  | TCGAATCAAA  | AGACCAACAA  | ACTCCTTTTA |
| 1321 | TCAAAACCTT | ACCAATTGTA  | CACTATATCG  | CCATCCCCGA  | GATGGACAAT  | ACCGCCGAAA |
| 1381 | AAACCATAAA | AATACAAAAC  | ACGAAAGTAA  | AAACCCTGTT  | TGACAGTGGA  | TCACCCACGT |
| 1441 | CATTTATCCG | AAGAGATATT  | GTAGAACTTC  | TCAAATACGA  | AATCTACGAG  | ACCCCTCCAC |
| 1501 | TCCGTTTTAG | AGGATTTCGTA | GCCACCAAAT  | CCGCCGTTAC  | ATCCGAAGCA  | GTCACCATTG |
| 1561 | ACCTCAAAAT | CAATGACCTG  | CATATAACTT  | TAGCCGCGTA  | CATACTGGAT  | AACATGGACT |
| 1621 | ACCAATTGTT | AATTGGAAAT  | CCAATCTTAC  | GCCGCTACCC  | GAAAATCCTG  | CACACAGTAC |
| 1681 | TGAATACCAG | AGAGAGCCCC  | GACTCCTTAA  | AGCCCAAGAC  | TTATCGCTCC  | GAAACCGTTA |
| 1741 | ATAACGTTAG | AACCTACTCC  | GCTGGTAATC  | GTGGTAACCC  | CAGAAACATA  | AAACTGTCTT |
| 1801 | TTGCCCCAC  | CATTCTCGAA  | GCAACTGACC  | CGAAATCCGC  | TGGTAATCGT  | GGTACTCCA  |
| 1861 | GAACCAAAC  | CCTGTCTCTT  | GCAACCACTA  | CTCCTGCAGC  | AATTGACCCG  | CTTACGACCC |
| 1921 | TTGATAACCC | AGGTAGTACT  | CAAAGTACAT  | TTGCGCAATT  | CCCGATACCT  | GAAGAAGCGA |
| 1981 | GCATCCTAGA | AGAGGATGGA  | AAATACTCCA  | ACGTTGTCTC  | AACCATTCAG  | AGTGTAGAAC |
| 2041 | CTAATGCTAC | TGATCACAGC  | AATAAGGACA  | CCTTTTGCAC  | TTTGCCAGTT  | TGGTTACAAC |
| 2101 | AGAAGTATAG | AGAGATCATA  | CGTAATGATC  | TCCCACCAAG  | ACCTGCCGAC  | ATTAATAACA |
| 2161 | TCCCCGTAAA | ACATGATATT  | GAAATTA AAC | CTGGCGCAAG  | ACTACCTCGA  | CTACAGCCAT |
| 2221 | ACCATGTTAC | AGAAAAGAAC  | GAACAAGAAA  | TCAACAAAAT  | AGTTCAAAAA  | CTGCTCGATA |
| 2281 | ACAAGTTCAT | TGTTCCCTCA  | AAGTCGCCTT  | GCAGCTCCCC  | TGTAGTCCTC  | GTCCCAGAGA |
| 2341 | AAGACGGTAC | CTTCCGACTC  | TGCGTTCGATT | ACCGCACCCCT | GAACAAAGCT  | ACCATCTCCG |
| 2401 | ACCCATTCCC | ATTACCCAGA  | ATCGACAACC  | TATTGAGCCG  | TATTGGAAAT  | GCCCAGATAT |
| 2461 | TTACCACGCT | AGATTTGCAT  | AGTGTTTACC  | ACCAGATCCC  | GATGGAACCC  | AAAGACCGCT |
| 2521 | ACAAAACCGC | CTTTGT CACA | CCATCCGGTA  | AGTATGAATA  | TACCGTCATG  | CCATTTGGCT |
| 2581 | TAGTCAATGC | ACCTAGTACA  | TTCGCAAGAT  | ACATGGCTGA  | TACATTTAGA  | GACCTGAGAT |
| 2641 | TCGTCAATGT | TTACCTTGAT  | GATATATTAA  | TATTCTCCGA  | ATCTCCAGAA  | GAACATTGGA |
| 2701 | AACATTTAGA | CACGGTACTA  | GAAAGATTAA  | AGAACGAGAA  | CCTCATTGTT  | AAGAAGAAAA |
| 2761 | AATGTAAATT | TGCATCTGAA  | GAAACTGAGT  | TTTTAGGCTA  | TAGTATTGGA  | ATCCAGAAAA |
| 2821 | TAGCTCCACT | ACAGCACAAA  | TGTGCAGCAA  | TCCGAGACTT  | TCCGACGCCT  | AAAACAGTAA |
| 2881 | AACAAGCACA | GAGATTTTTA  | GGAATGATTA  | ATTACTACAG  | ACGATTCATT  | CCAAATTGCT |
| 2941 | CCAAGATTGC | ACAGCCAATC  | CAACTGTTTA  | TTTGTGACAA  | AAGTCAATGG  | ACAGAAAAAC |
| 3001 | AAGACAAGGC | AATTGATAAA  | CTAAAAGACG  | CCTTGTGTAA  | CTCCCCGCTC  | CTAGTACCAT |
| 3061 | TCAACAACAA | AGCAA ACTAC | CGACTTACAA  | CAGACGCCTC  | AAAAGACGGC  | ATTGGTGCTG |
| 3121 | TTCTAGAAGA | AGTCGACAAC  | AAGAACAAAC  | TTGTTGGTGT  | CGTCGGTTAC  | TTCTCTAAAT |
| 3181 | CCTTAGAGAG | TGCCCAGAAA  | AACTATCCTG  | CTGGCGAATT  | AGA ACTACTT | GGAATTATCA |
| 3241 | AAGCACTCCA | CCACTTCCGA  | TATATGCTTC  | ACGAAAGCA   | TTTCACGTTA  | AGAACAGACC |
| 3301 | ACATTAGTTT | GTTATCATT A | CAAAACAAGA  | ACGAACCCGC  | ACGACGCGTG  | CAACGCTGGT |
| 3361 | TAGATGACCT | AGCCACATAT  | GACTTCACCT  | TAGAATACCT  | AGCTGGACCC  | AAGAACGTTG |
| 3421 | TCGCAGATGC | CATATCCCGT  | GCCGTATATA  | CTATAACCCC  | CGAAACATCC  | CGACCTATCG |
| 3481 | ACACAGAAAG | CTGGAAATCT  | TACTACAAAT  | CAGACCCATT  | ATGTAGTGCT  | GTCTTAATTC |
| 3541 | ATATGAAAGA | ATTGACACAA  | CACAACGTCA  | CACCTGAAGA  | TATGTCAGCC  | TTCCGTAGTT |

3601 ACCAGAAGAA ACTCGAACTA TCAGAGACCT TCCGAAAGAA TTATTCCCTA GAAGACGAAA  
3661 TGATCTATTA CCAAGACCGA CTAGTAGTAC CAATAAAACA ACAGAACGCA GTTATGAGAC  
3721 TATATCATGA CCATACCTTA TTTGGAGGAC ATTTTGGTGT AACAGTGACC CTTGCGAAAA  
3781 TCAGCCCAAT TTACTATTGG CCAAAATTAC AACATTTCGAT CATAACAATAC ATCAGGACCT  
3841 GCGTACAATG TCAACTAATA AAATCACACC GACCACGCTT ACATGGACTA TTACAACCAC  
3901 TCCCTATAGC AGAAGGAAGA TGGCTTGATA TATCAATGGA TTTTGTGACA GGATTACCCC  
3961 CGACATCAA TAACTTGAAT ATGATCCTCG TCGTAGTTGA TCGTTTTTCG AAACGCGCTC  
4021 ACTTCATAGC TACAAGGAAA ACCTTAGACG CAACACAAC AATAGATCTA CTCTTTCGAT  
4081 ACATTTTTTC ATATCATGGT TTTCCCAGGA CAATAACCAG TGATAGAGAT GTCCGTATGA  
4141 CCGCCGACAA ATATCAAGAA CTCACGAAAA GACTAGGAAT AAAATCGACA ATGTCTTCCG  
4201 CGAACCACCC CCAAACAGAT GGACAATCCG AACGAACGAT ACAGACATTA AACAGGTTAC  
4261 TAAGAGCCTA TGCTTCAACC AATATTCAGA ATTGGCATGT ATATTTACCA CAAATCGAAT  
4321 TTGTTTACAA TTCTACACCT ACTAGAACAC TTGGAAAATC ACCATTTGAA ATTGATTTAG  
4381 GATATTTACC GAATACCCCT GCTATTAAGT CAGATGACGA AGTCAACGCA AGAAGTTTTA  
4441 CTGCCGTAGA ACTTGCCAAA CACCTCAAAG CCCTTACCAT CCAAACGAAG GAACAGCTAG  
4501 AACACGCTCA AATCGAAATG GAAACTAATA ACAATCAAAG ACGTAAACCC TTATTGTTAA  
4561 ACATAGGAGA TCACGTATTA GTGCATAGAG ATGCATACTT CAAGAAAGGT GCTTATATGA  
4621 AAGTACAACA AATATACGTC GGACCATTTC GAGTTGTCAA GAAAATAAAC GATAACGCCT  
4681 ACGAACTAGA TTTAAACTCT CACAAGAAAA AGCACAGAGT TATTAATGTA CAATTCCTGA  
4741 AAAAGTTTGT ATACCGTCCA GACGCGTACC CAAAGAATA ACCAATCAGC TCCACTGAAA  
4801 GAATTAAGAG AGCACACGAA GTTACTGCAC TCATAGGAAT AGATACTACA CACAAACTT  
4861 ACTTATGTCA CATGCAAGAT GTAGACCCAA CACTTTCAGT AGAATACTCA GAAGCTGAAT  
4921 TTTGCCAAAT TCCC GAAAGA ACACGAAGAT CAATATTAGC CAACTTTAGA CAACTCTACG  
4981 AAACACAAGA CAACCCTGAG AGAGAGGAAG ATGTTGTATC TCAAAATGAG ATATGTCAGT  
5041 ATGACAATAC GTCACCCTGA ACGTTCATAA AACACATATG AAACAACCTT ATAACAAAAC  
5101 GAACAACATG AGACAAAACC CGACCTTCCC TAGCTGAACT ACCCAAAGTA TAAATGCCTG  
5161 AACAATTAGT TTAGATCCGA GATTCCGCGC TTCCACCACT TAGTATGATT CATATTTTAT  
5221 ATAATATATA AGATAAGTAA CATTCGCTGA ATTAATCTGA TAAACTGTTT TGACAACCTGG  
5281 TTACTTCCCT AAGACTGTTT ATATTAGGAT TGTCAAGACA CTCCGGTATT ACTCGAGCCC  
5341 GTAATACAAC A

//

```

FEATURES             Location/Qualifiers
     misc_feature    1559..5327
                     /note="POL3"
     misc_feature    493..503
                     /note="start of transcription "
     misc_feature    493..543
                     /note="R"
     misc_feature    544..610
                     /note="U5"
     misc_feature    613..620
                     /note="5' PBS"
     misc_feature    393..492
                     /note="Partial U3"
     misc_feature    686..1306
                     /note="Capsid"
     misc_feature    1307..1384
                     /note=""
     misc_feature    1385..1558
                     /note="Nucleocapsid"
     misc_feature    5282..5503
                     /note="U3"
     misc_feature    5504..5554
                     /note="R"
     misc_feature    5439..5452
                     /note="3' PBSA"
     misc_feature    5457..5466
                     /note="3' PBSB"
     misc_feature    5512..5515
                     /note="mapped end of transcript 1"
     misc_feature    5533..5535
                     /note="mapped end of transcript 2"
     misc_feature    5545..5547
                     /note="mapped end of transcript 3"
     misc_feature    5552..5554
                     /note="mapped end of transcript 4"
     misc_feature    5555..5621
                     /note="U5"
     CDS              686..1306
                     /note=""
                     /translation="MSFMDQIPGGGNYPKLPVECLPNFPIQPSLTFRGRNDSHKLNFI
ISEIMLNMSMISWPNDASRIVYCRRHLLNPAAQWANDFVQEQGILEITFDTFIQGLYQ
HFYKPPDINKIFNAITQLSEAKLGIERLNQRFRKIWDRMPPDFMTEKAAIMTYTRLLT
KETYNIVRMHKPETLKDAMEEAYQTTALTERFFPGFELDADGDTIIG"
     CDS              1307..1384
                     /note=""
                     /translation="ATTHLQEEYDSYDSEDNLTQNGYVH"
     CDS              1385..1558
                     /note=""
                     /translation="TVRTRRSYNKPMNSHRNRRNNNPSREECIKNRLCFYCKKEGHRL
NECRARKASSNRS"
     misc_feature    13795..14091
                     /note="Gal1-10 Promoter"
     source            1..13794

```

## ORIGIN

```

1 GATCAAAAAT CATCGCTTCG CTGATTAATT ACCCCAGAAA TAAGGCTAAA AAAC TAATCG
61 CATTATCATC CTATGGTTGT TAATTTGATT CGTTCATTTG AAGGTTTGTG GGGCCAGGTT
121 ACTGCCAATT TTTCCCTCTC ATAACCATAA AAGCTAGTAT TGTAGAATCT TTATTGTTCCG
181 GAGCAGTGCG GCGCGAGGCA CATCTGCGTT TCAGGAACGC GACCGGTGAA GACGAGGACG
241 CACGGAGGAG AGTCTTCCTT CGGAGGGCTG TCACCCGCTC GCGGCTTCT AATCCGTA CT
301 TCAATATAGC AATGAGCAGT TAAGCGTATT ACTGAAAGTT CCAAAGAGAA GGTTTTTTTA
361 GGCTAACTCG AGCTCGACTC TAGAGGATCC CCCTGAACTA CCCAAAGTAT AAATGCCTGA
421 ACAATTAGTT TAGATCCGAG ATTCCGCGCT TCCACCACTT AGTATGATTC ATATTTTATA
481 TAATATATAA GATAAGTAAC ATTCCGTGAA TTAATCTGAT AAAC TGT TTTT GACA ACTGGT
541 TACTTCCCTA AGACTGTTTA TATTAGGATT GTCAAGACAC TCCGGTATTA CTCGAGCCCG
601 TAATACAACA CCTGGTAGCG TTAAAGGTTA CTAATTGTTT AAACGAACCA TCGAAAAGCC
661 GAACCTAGCT ACACCACACC CCAGTATGAG CTTTATGGAT CAAATCCCAG GAGGAGGAAA
721 TTATCCAAAA CTCCAGTAG AATGCCTTCC TAACTTCCCG ATCCAACCAT CTTTGACCTT
781 CAGAGGTAGA AATGACTCGC ATAAACTGAA AAAC TTTTATC TCCGAAATAA TGTTAAACAT
841 GTCTATGATA TCTTGGCCGA ATGATGCCAG TCGTATTGTG TACTGCAGAA GACATTTATT
901 AAACCCCGCT GCTCAGTGGG CTAATGACTT TGTACAAGAA CAAGGTATAC TTGAAATAAC
961 ATTCGACACA TTCATACAAG GATTATATCA GCATTTCTAT AAGCCACCAG ATATCAATAA
1021 AATCTTTAAT GCAATCACGC AACTTTCCGA AGCTAAACTT GGTATTGAGC GTCTCAACCA
1081 ACGATTCAGA AAGATTTGGG ACAGAATGCC ACCAGACTTC ATGACCGAAA AAGCTGCCAT
1141 AATGACATAT ACTAGGCTAT TGACAAAGGA AACCTATAAT ATTGTCAGAA TGCACAAACC
1201 AGAGACATTA AAAGACGCCA TGGAAGAGGC TTACCAGACA ACTGC ACTAA CTGAAAGATT
1261 CTTCCAGGA TTCGAACTTG ATGCTGATGG AGACACTATC ATCGGTGCCA CAACCCACTT
1321 ACAAGAAGAA TACGACTCTG ACTATGATTC AGAAGATAAT CTGACCCAGA ATGGATACGT
1381 CCATACCGTA AGGACAAGAA GATCTTACAA TAAACCAATG TCAAATCATC GAAACAGGAG
1441 AAATAACAAC CCATCTAGAG AAGAATGTAT AAAAAATCGG CTATGCTTCT ATTGTAAGAA
1501 AGAGGGACAT CGCCTGAACG AATGTAGAGC ACGTAAGGCG AGTTCTAACC GATCTTGAAC
1561 TCGAATCAAAGACCAACAA ACTCCTTTTA TCAAACCTT ACCAATTGTA CACTATATCG
1621 CCATCCCCGA GATGGACAAT ACCGCCGAAA AAACCATAAA AATACAAAAC ACGAAAGTAA
1681 AAACCTGTT TGACAGTGGG TCACCCACGT CATTTATCCG AAGAGATATT GTAGA ACTTC
1741 TCAAATACGA AATCTACGAG ACCCTCCAC TCCGTTTTAG AGGATTCGTA GCCACCAAT
1801 CCGCCGTTAC ATCCGAAGCA GTCACCATTG ACCTCAAAAT CAATGACCTG CATATACTT
1861 TAGCCGCGTA CATACTGGAT AACATGGACT ACCAATTGTT AATTGGAAAT CCAATCTTAC
1921 GCCGCTACCC GAAAATCCTG CACACAGTAC TGAATACCAG AGAGAGCCCC GACTCCTTAA
1981 AGCCCAAGAC TTATCGCTCC GAAACCGTTA ATAACGTTAG AACCTACTCC GCTGGTAATC
2041 GTGGTAACCC CAGAAACATA AAAGTGTCTT TTGCCCCAC CATTCTCGAA GCAACTGACC
2101 CGAAATCCGC TGGTAATCGT GGTGACTCCA GAACCAAAAC CCTGTCTCTT GCAACCTA
2161 CTCCTGCAGC AATTGACCCG CTTACGACCC TTGATAACCC AGGTAGTACT CAAAGTACAT
2221 TTGCGCAATT CCCGATACCT GAAGAAGCGA GCATCCTAGA AGAGGATGGA AAATACTCCA
2281 ACGTTGTCTC AACCATTAG AGTGTAGAAC CTAATGCTAC TGATCACAGC AATAAGGACA
2341 CTTTTGCAC TTTGCCAGTT TGGTTACAAC AGAAGTATAG AGAGATCATA CGTAATGATC
2401 TCCACCAAG ACCTGCCGAC ATTAATAACA TCCCGTAAA ACATGATATT GAAATTAAC
2461 CTGGCGCAAG ACTACCTCGA CTACAGCCAT ACCATGTTAC AGAAAAGAAC GAACAAGAAA
2521 TCAACAAAAT AGTTCAAAA CTGCTCGATA ACAAGTTCAT TGTTCCCTCA AAGTCGCTT
2581 GCAGCTCCCC TGTAGTCCTC GTCCCGAAGA AAGACGGTAC CTTCCGACTC TCGCTCGATT
2641 ACCGCACCCT GAACAAAGCT ACCATCTCCG ACCCATCCC ATTACCAGA ATCGACAACC
2701 TATTGAGCCG TATTGAAAT GCCCAGATAT TTACCACGCT AGATTTGCAT AGTGGTTACC
2761 ACCAGATCCC GATGGAACCC AAAGACCGCT ACAAACCGC CTTTGT CACA CCATCCGGTA
2821 AGTATGAATA TACCGTCATG CCATTTGGCT TAGTCAATGC ACCTAGTACA TTCGCAAGAT
2881 ACATGGCTGA TACATTTAGA GACCTGAGAT TCGTCAATGT TTACCTGAT GATATATTAA
2941 TATTCTCCGA ATCTCCAGAA GAACATTGGA AACATTTAGA CACGGTACTA GAAAGATTAA
3001 AGAACGAGAA CCTCATTGTT AAGAAGAAAA AATGTAAATT TGCATCTGAA GAAACTGAGT
3061 TTTTAGGCTA TAGTATTGGA ATCCAGAAAA TAGCTCCACT ACAGCACAAA TGTGCAGCAA

```

|      |             |             |             |             |              |            |
|------|-------------|-------------|-------------|-------------|--------------|------------|
| 3121 | TCCGAGACTT  | TCCGACGCCT  | AAAACAGTAA  | AACAAGCACA  | GAGATTTTTTA  | GGAATGATTA |
| 3181 | ATTACTACAG  | ACGATTCATT  | CCAAATTGCT  | CCAAGATTGC  | ACAGCCAATC   | CAACTGTTTA |
| 3241 | TTTGTGACAA  | AAGTCAATGG  | ACAGAAAAAC  | AAGACAAGGC  | AATTGATAAA   | CTAAAAGACG |
| 3301 | CCTTGTGTAA  | CTCCCCCGTC  | CTAGTACCAT  | TCAACAACAA  | AGCAAACACTAC | CGACTTACAA |
| 3361 | CAGACGCCTC  | AAAAGACGGC  | ATTGGTGCTG  | TTCTAGAAGA  | AGTCGACAAC   | AAGAACAAC  |
| 3421 | TTGTTGGTGT  | CGTCGGTTAC  | TTCTCTAAAT  | CCTTAGAGAG  | TGCCCAGAAA   | AACTATCCTG |
| 3481 | CTGGCGAATT  | AGAACTACTT  | GGAATTATCA  | AAGCACTCCA  | CCACTTCCGA   | TATATGCTTC |
| 3541 | ACGAAAGCA   | TTTCACGTTA  | AGAACAGACC  | ACATTAGTTT  | GTTATCATTA   | CAAAACAAGA |
| 3601 | ACGAACCCGA  | CGAACGCGTG  | CAACGCTGGT  | TAGATGACCT  | AGCCACATAT   | GACTTCACCT |
| 3661 | TAGAATACCT  | AGCTGGACCC  | AAGAACGTTG  | TCGCAGATGC  | CATATCCCGT   | GCCGTATATA |
| 3721 | CTATAACCCC  | CGAAACATCC  | CGACCTATCG  | ACACAGAAAG  | CTGGAAATCT   | TACTACAAAT |
| 3781 | CAGACCCATT  | ATGTAGTGCT  | GTCTTAATTC  | ATATGAAAGA  | ATTGACACAA   | CACAACGTCA |
| 3841 | CACCTGAAGA  | TATGTCAGCC  | TTCCGTAGTT  | ACCAGAAGAA  | ACTCGAACTA   | TCAGAGACCT |
| 3901 | TCCGAAAAGAA | TTATTCCTTA  | GAAGACGAAA  | TGATCTATTA  | CCAAGACCGA   | CTAGTAGTAC |
| 3961 | CAATAAAACA  | ACAGAACGCA  | GTTATGAGAC  | TATATCATGA  | CCATACCTTA   | TTTGGAGGAC |
| 4021 | ATTTTGGTGT  | AACAGTGACC  | CTTGCGAAAA  | TCAGCCCAAT  | TTACTATTGG   | CCAAAATTAC |
| 4081 | AACATTCGAT  | CATACAATAC  | ATCAGGACCT  | GCGTACAATG  | TCAACTAATA   | AAATCACACC |
| 4141 | GACCACGCTT  | ACATGGACTA  | TTACAACCAC  | TCCCTATAGC  | AGAAGGAAGA   | TGGCTTGATA |
| 4201 | TATCAATGGA  | TTTTGTGACA  | GGATTACCCC  | CGACATCAAA  | TAAGTTGAAT   | ATGATCCTCG |
| 4261 | TCGTAGTTGA  | TCGTTTTTTCG | AAACGCGCTC  | ACTTCATAGC  | TACAAGGAAA   | ACCTTAGACG |
| 4321 | CAACACAACT  | AATAGATCTA  | CTCTTTTCGAT | ACATTTTTTTC | ATATCATGGT   | TTTCCAGGA  |
| 4381 | CAATAACCAG  | TGATAGAGAT  | GTCCGTATGA  | CCGCCGACAA  | ATATCAAGAA   | CTCACGAAAA |
| 4441 | GACTAGGAAT  | AAAATCGACA  | ATGTCTTCCG  | CGAACCACCC  | CCAACAGAT    | GGACAATCCG |
| 4501 | AACGAACGAT  | ACAGACATTA  | AACAGGTTAC  | TAAGAGCCTA  | TGCTTCAACC   | AATATTCAGA |
| 4561 | ATTGGCATGT  | ATATTTACCA  | CAAATCGAAT  | TTGTTTACAA  | TTCTACACCT   | ACTAGAACAC |
| 4621 | TTGGAAAATC  | ACCATTTGAA  | ATTGATTTAG  | GATATTTACC  | GAATACCCCT   | GCTATTAAGT |
| 4681 | CAGATGACGA  | AGTCAACGCA  | AGAAGTTTTA  | CTGCCGTAGA  | ACTTGCCAAA   | CACCTCAAAG |
| 4741 | CCCTTACCAT  | CCAAACGAAG  | GAACAGCTAG  | AACACGCTCA  | AATCGAAATG   | GAAACTAATA |
| 4801 | ACAATCAAAG  | ACGTAAACCC  | TTATTGTTAA  | ACATAGGAGA  | TCACGTATTA   | GTGCATAGAG |
| 4861 | ATGCATACTT  | CAAGAAAGGT  | GCTTATATGA  | AAGTACAACA  | AATATACGTC   | GGACCATTTT |
| 4921 | GAGTTGTCAA  | GAAAATAAAC  | GATAACGCCT  | ACGAACTAGA  | TTTAAACTCT   | CACAAGAAAA |
| 4981 | AGCACAGAGT  | TATTAATGTA  | CAATTCCTGA  | AAAAGTTTGT  | ATACCGTCCA   | GACGCGTACC |
| 5041 | CAAAGAATAA  | ACCAATCAGC  | TCCACTGAAA  | GAATTAAGAG  | AGCACACGAA   | GTTACTGCAC |
| 5101 | TCATAGGAAT  | AGATACTACA  | CACAAAACCT  | ACTTATGTCA  | CATGCAAGAT   | GTAGACCCAA |
| 5161 | CACTTTCAGT  | AGAATACTCA  | GAAGCTGAAT  | TTTGCCAAAT  | TCCCAGAAAG   | ACACGAAGAT |
| 5221 | CAATATTAGC  | CAACTTTAGA  | CAACTCTACG  | AAACACAAGA  | CAACCCTGAG   | AGAGAGGAAG |
| 5281 | ATGTTGTATC  | TCAAAATGAG  | ATATGTCAGT  | ATGACAATAC  | GTCACCCTGA   | ACGTTCATAA |
| 5341 | AACACATATG  | AAACAACCTT  | ATAACAAAAC  | GAACAACATG  | AGACAAAACC   | CGACCTTCCC |
| 5401 | TAGCTGAACT  | ACCCAAAGTA  | TAAATGCCTG  | AACAATTAGT  | TTAGATCCGA   | GATTCCGCGC |
| 5461 | TTCCACCACT  | TAGTATGATT  | CATATTTTAT  | ATAATATATA  | AGATAAGTAA   | CATTCCGTGA |
| 5521 | ATTAATCTGA  | TAAACTGTTT  | TGACAACCTG  | TTACTTCCCT  | AAGACTGTTT   | ATATTAGGAT |
| 5581 | TGTCAAGACA  | CTCCGGTATT  | ACTCGAGCCC  | GTAATACAAC  | AGAAAGTTCC   | ATTTTGGATG |
| 5641 | CTCTATTTAT  | GGGAATATGA  | CTATACGAAT  | GTCACCCACG  | ATGGCCGGAG   | TAGCTGTGAT |
| 5701 | GAGCATCTTT  | TTGTCTGGGC  | GGCTTAAAAC  | GTGAGCAAAA  | TTGTACTGTA   | AATTACTTAC |
| 5761 | GTTATCAATG  | GAAGTGTGTG  | AATTTTCGTGA | TAAAATTATT  | GTCAGAATAG   | TGACTTCATT |
| 5821 | ATTCTTTATA  | ACTAACCATT  | AGGATCATAT  | AAGTAATCAG  | ATGCAGTTCG   | TCATTAATAT |
| 5881 | GTCAGGATGG  | ATAACCATAG  | GTAAGCACGT  | GATTATGGAA  | GGACAGTAAA   | GTTACCGATC |
| 5941 | TACTTTTTTTG | AATGATCAAC  | TTGGTGTTTT  | CATCTATAAG  | GATATGGGTC   | GTTACATTGA |
| 6001 | AACTATAGTA  | AAAGATCTCG  | TTATTGGTAT  | ATCGGTCATA  | ATGAAGATGA   | AATAGTCGGT |
| 6061 | ATGTATTTTT  | ATACCCCCC   | CTATATGGTA  | AAAAGGTTAA  | GATTCATATT   | TAAATCTTCA |
| 6121 | TTAATAACCAC | CTCTAATTTT  | TAATTACCAA  | CATTTTTTAA  | TCCACTTTTA   | TTATATGCTA |
| 6181 | TATACAACAT  | TATGTAAAAG  | GAGTATACCA  | AAAATTCTCC  | TTCATAATAT   | AGGAATTCCA |
| 6241 | CGGACTATAG  | ACTATACTAG  | TATACTCCGT  | CTACTGTACG  | ATACACTTCC   | GCTCAGGTCC |
| 6301 | TTGTCCTTTA  | ACGAGGCCTT  | ACCACTCTTT  | TGTTACTCTA  | TTGATCCAGC   | TCAGCAAAGG |

|      |            |             |             |            |            |             |
|------|------------|-------------|-------------|------------|------------|-------------|
| 6361 | CAGTGTGATC | TAAGATTCTA  | TCTTCGCGAT  | GTAGTAAAAC | TAGCTAGACC | GAGAAAGAGA  |
| 6421 | CTAGAAATGC | AAAAGGCACT  | TCTACAATGG  | CTGCCATCAT | TATTATCCGA | TGTGACGCTG  |
| 6481 | CAGCTTCTCA | ATGATATTCG  | AATACGCTTT  | GAGGAGATAC | AGCCTAATAT | CCGACAAACT  |
| 6541 | GTTTTACAGA | TTTACGATCG  | TACTTGTTAC  | CCATCATTGA | ATTTTGAACA | TCCGAACCTG  |
| 6601 | GGAGTTTTCC | CTGAAACAGA  | TAGTATATTT  | GAACCTGTAT | AATAATATAT | AGTCTAGCGC  |
| 6661 | TTTACGGAAG | ACAATGTATG  | TATTTCCGTT  | CCTGGAGAAA | CTATTGCATC | TATTGCATAG  |
| 6721 | GTAATCTTGC | ACGTCGCATC  | CCCGTTTCAT  | TTTCTGCGTT | TCCATCTTGC | ACTTCAATAG  |
| 6781 | CATATCTTTG | TTAACGAAGC  | ATCTGTGCTT  | CATTTTGTAG | AACAAAAATG | CAACGCGAGA  |
| 6841 | GCGCTAATTT | TTCAAACAAA  | GAATCTGAGC  | TGCATTTTTA | CAGAACAGAA | ATGCAACGCG  |
| 6901 | AAAGCGCTAT | TTTACCAACG  | AAGAATCTGT  | GCTTCATTTT | TGTAAAACAA | AAATGCAACG  |
| 6961 | CGAGAGCGCT | AATTTTTTCAA | ACAAAGAATC  | TGAGCTGCAT | TTTTACAGAA | CAGAAATGCA  |
| 7021 | ACGCGAGAGC | GCTATTTTAC  | CAACAAAGAA  | TCTATACTTC | TTTTTTGTTC | TACAAAAATG  |
| 7081 | CATCCCGAGA | GCGCTATTTT  | TCTAACAAAG  | CATCTTAGAT | TACTTTTTTT | CTCCTTTGTG  |
| 7141 | CGCTCTATAA | TGCAGTCTCT  | TGATAACTTT  | TTGCACTGTA | GGTCCGTAA  | GGTTAGAAGA  |
| 7201 | AGGCTACTTT | GGTGTCTATT  | TTCTCTTCCA  | TAAAAAAGC  | CTGACTCCAC | TTCCC GCGTT |
| 7261 | TACTGATTAC | TAGCGAAGCT  | GCGGGTGCAT  | TTTTTCAAGA | TAAAGGCATC | CCC GATTATA |
| 7321 | TTCTATACCG | ATGTGGATTG  | CGCATACTTT  | GTGAACAGAA | AGTGATAGCG | TTGATGATTC  |
| 7381 | TTCATTGGTC | AGAAAATTAT  | GAACGGTTTC  | TTCTATTTTG | TCTCTATATA | CTACGTATAG  |
| 7441 | GAAATGTTTA | CATTTTCGTA  | TTGTTTTCGA  | TTCACTCTAT | GAATAGTCT  | TACTACAATT  |
| 7501 | TTTTTGTCTA | AAGAGTAATA  | CTAGAGATAA  | ACATAAAAAA | TGTAGAGGTC | GAGTTTAGAT  |
| 7561 | GCAAGTTCAA | GGAGCGAAAG  | GTGGATGGGT  | AGGTTATATA | GGGATATAGC | ACAGAGATAT  |
| 7621 | ATAGCAAAGA | GATACTTTTG  | AGCAATGTTT  | GTGGAAGCGG | TATTCGCAAT | ATTTTAGTAG  |
| 7681 | CTCGTTACAG | TCCGGTGCCT  | TTTTGGTTTT  | TTGAAAGTGC | GTCTTCAGAG | CGCTTTTGGT  |
| 7741 | TTTCAAAGC  | GCTCTGAAGT  | TCCTATACTT  | TCTAGAGAAT | AGGAACTTCG | GAATAGGAAC  |
| 7801 | TTCAAAGCGT | TTCCGAAAAC  | GAGCGCTTCC  | GAAAATGCAA | CGCGAGCTGC | GCACATACAG  |
| 7861 | CTCACTGTTC | ACGTCGCACC  | TATATCTGCG  | TGTTGCCTGT | ATATATATAT | ACATGAGAAG  |
| 7921 | AACGGCATAG | TGCGTGTTTA  | TGCTTAAATG  | CGTACTTATA | TGCGTCTATT | TATGTAGGAT  |
| 7981 | GAAAGGTAGT | CTAGTACCTC  | CTGTGATATT  | ATCCCATTCC | ATGCGGGGTA | TCGTATGCTT  |
| 8041 | CCTTCAGCAC | TACCCTTTAG  | CTGTTCTATA  | TGCTGCCACT | CCTCAATTGG | ATTAGTCTCA  |
| 8101 | TCCTTCAATG | CTATCATTTT  | CTTTGATATT  | GGATCATATG | CATAGTACCG | AGAAACTAGT  |
| 8161 | GCGAAGTAGT | GATCAGGTAT  | TGCTGTTATC  | TGATGAGTAT | ACGTTGTCCT | GGCCACGGCA  |
| 8221 | GAAGCACGCT | TATCGCTCCA  | ATTTCCACAA  | ACATTAGTCA | ACTCCGTTAG | GCCCTTCATT  |
| 8281 | GAAAGAAATG | AGGTCATCAA  | ATGTCTTCCA  | ATGTGAGATT | TTGGGCCATT | TTTTATAGCA  |
| 8341 | AAGATTGAAT | AAGGCGCATT  | TTTCTTCAAA  | GCTTTATTGT | ACGATCTGAC | TAAGTTATCT  |
| 8401 | TTTAATAAAT | GGTATTCCTG  | TTTATTGCTT  | GAAGAATTGC | CGTCCCTATT | TACTCGTTTT  |
| 8461 | AGGACTGGTT | CAGAATTCGG  | TCTCCCTATA  | GTGAGTCGTA | TTAATTCGAT | ATCCGTAATC  |
| 8521 | ATGGTCATAG | CTGTTTCCTG  | TGTGAAATTG  | TTATCCGCTC | ACAATTCCAC | ACAACATACG  |
| 8581 | AGCCGGAAGC | ATAAAGTGTA  | AAGCCTGGGG  | TGCCTAATGA | GTGAGCTAAC | TCACATTAAT  |
| 8641 | TGCGTTGCGC | TCACTGCCCG  | CTTTCAGTCT  | GGGAAACCTG | TCGTGCCAGC | TGCATTAATG  |
| 8701 | AATCGGCCAA | CGCGCGGGGA  | GAGGCGGTTT  | GCGTATTGGG | CGCTCTTCCG | CTTCTCGCT   |
| 8761 | CACTGACTCG | CTGCGCTCGG  | TCGTTCCGCT  | GCGGCGAGCG | GTATCAGCTC | ACTCAAAGGC  |
| 8821 | GGTAATACGG | TTATCCACAG  | AATCAGGGGA  | TAACGCAGGA | AAGAACATGT | GAGCAAAAGG  |
| 8881 | CCAGCAAAAG | GCCAGGAACC  | GTAAAAAGGC  | CGCGTTGCTG | GCGTTTTTCC | ATAGGCTCCG  |
| 8941 | CCCCCTGAC  | GAGCATCACA  | AAAATCGACG  | CTCAAGTCAG | AGGTGGCGAA | ACCCGACAGG  |
| 9001 | ACTATAAAGA | TACCAGGCGT  | TTCCCCCTGG  | AAGCTCCCTC | GTGCGCTCTC | CTGTTCCGAC  |
| 9061 | CCTGCCGCTT | ACCGGATACC  | TGTCCGCCTT  | TCTCCCTTCG | GGAAGCGTGG | CGCTTCTCTA  |
| 9121 | TAGCTCACGC | TGTAGGTATC  | TCAGTTCGGT  | GTAGGTCGTT | CGCTCCAAGC | TGGGCTGTGT  |
| 9181 | GCACGAACCC | CCCGTTCAGC  | CCGACCGCTG  | CGCCTTATCC | GGTAACTATC | GTCTTGAGTC  |
| 9241 | CAACCCGGTA | AGACACGACT  | TATCGCCACT  | GGCAGCAGCC | ACTGGTAACA | GGATTAGCAG  |
| 9301 | AGCGAGGTAT | GTAGGCGGTG  | CTACAGAGTT  | CTTGAAGTGG | TGGCCTAACT | ACGGCTACAC  |
| 9361 | TAGAAGGACA | GTATTTGGTA  | TCTGCGCTCT  | GCTGAAGCCA | GTTACCTTCG | GAAAAAGAGT  |
| 9421 | TGGTAGCTCT | TGATCCGGCA  | AACAAACCAC  | CGCTGGTAGC | GGTGGTTTTT | TTGTTTGCAA  |
| 9481 | GCAGCAGATT | ACGCGCAGAA  | AAAAAGGATC  | TCAAGAAGAT | CCTTTGATCT | TTTCTACGGG  |
| 9541 | GTCTGACGCT | CAGTGGAAACG | AAAACCTCACG | TTAAGGGATT | TTGGTCATGA | GATTATCAAA  |

|       |             |             |             |             |             |             |
|-------|-------------|-------------|-------------|-------------|-------------|-------------|
| 9601  | AAGGATCTTC  | ACCTAGATCC  | TTTTAAATTA  | AAAATGAAGT  | TTTAAATCAA  | TCTAAAGTAT  |
| 9661  | ATATGAGTAA  | ACTTGGTCTG  | ACAGTTACCA  | ATGCTTAATC  | AGTGAGGCAC  | CTATCTCAGC  |
| 9721  | GATCTGTCTA  | TTTCGTTTCA  | CCATAGTTGC  | CTGACTCCCC  | GTCGTGTAGA  | TAACTACGAT  |
| 9781  | ACGGGAGGGC  | TTACCATCTG  | GCCCCAGTGC  | TGCAATGATA  | CCGCGAGACC  | CACGCTCACC  |
| 9841  | GGCTCCAGAT  | TTATCAGCAA  | TAAACCAGCC  | AGCCGGAAGG  | GCCGAGCGCA  | GAAGTGGTCC  |
| 9901  | TGCAACTTTA  | TCCGCCTCCA  | TCCAGTCTAT  | TAATTGTTGC  | CGGGAAGCTA  | GAGTAAGTAG  |
| 9961  | TTCGCCAGTT  | AATAGTTTGC  | GCAACGTTGT  | TGCCATTGCT  | ACAGGCATCG  | TGGTGTCCAG  |
| 10021 | CTCGTCGTTT  | GGTATGGCTT  | CATTCAGCTC  | CGGTTCCCAA  | CGATCAAGGC  | GAGTTACATG  |
| 10081 | ATCCCCCATG  | TTGTGCAAAA  | AAGCGGTTAG  | CTCCTTCGGT  | CCTCCGATCG  | TTGTCCAGAAG |
| 10141 | TAAGTTGGCC  | GCAGTGTTAT  | CACTCATGGT  | TATGGCAGCA  | CTGCATAATC  | CTCTTACTGT  |
| 10201 | CATGCCATCC  | GTAAGATGCT  | TTTCTGTGAC  | TGGTGAGTAC  | TCAACCAAGT  | CATTCTGAGA  |
| 10261 | ATAGTGTATG  | CGGCGACCGA  | GTTGGTCTTG  | CCCGGCGTCA  | ATACGGGATA  | ATACCGCGCC  |
| 10321 | ACATAGCAGA  | ACTTTAAAAG  | TGCTCATCAT  | TGGAAAACGT  | TCTTCGGGGC  | GAAAACCTC   |
| 10381 | AAGGATCTTA  | CCGCTGTTTA  | GATCCAGTTC  | GATGTAACCC  | ACTCGTGCAC  | CCAACTGATC  |
| 10441 | TTCAGCATCT  | TTTACTTTCA  | CCAGCGTTTC  | TGGGTGAGCA  | AAAACAGGAA  | GGCAAAATGC  |
| 10501 | CGCAAAAAG   | GGAATAAGGG  | CGACACGGAA  | ATGTTGAATA  | CTCATACTCT  | TCCTTTTTCA  |
| 10561 | ATATTATTGA  | AGCATTTATC  | AGGGTTATTG  | TCTCATGAGC  | GGATACATAT  | TTGAATGTAT  |
| 10621 | TTAGAAAAAT  | AAACAAATAG  | GGGTTCCGCG  | CACATTTCCC  | CGAAAAGTGC  | CACCTGACGT  |
| 10681 | CTAAGAAACC  | ATTATTATCA  | TGACATTAAC  | CTATAAAAAT  | AGGCGTATCA  | CGAGGCCCTT  |
| 10741 | TCGTCTCGCG  | CGTTTCGGTG  | ATGACGGTGA  | AAACCTCTGA  | CACATGCAGC  | TCCCGGAGAC  |
| 10801 | GGTCACAGCT  | TGTCTGTAAG  | CGGATGCCGG  | GAGCAGACAA  | GCCCCTCAGG  | GTGCGTCAGC  |
| 10861 | GGGTGTTGGC  | GGGTGTCGGG  | GCTGGCTTAA  | CTATGCGGCA  | TCAGAGCAGA  | TTGTACTGAG  |
| 10921 | AGTGCACCAT  | ATGCGGTGTG  | AAATACCGCA  | CAGATGCGTA  | AGGAGAAAAT  | ACCGCATCAG  |
| 10981 | GAANTTCCAG  | ACGATTGAGC  | GTCAAAATGT  | AGGTATTTCC  | ATGAGCGTTT  | TTCTGTGTC   |
| 11041 | AATGGCTGGC  | GGTAATATTG  | TTCTGGATAT  | TACCAGCAAG  | GCCGATAGTT  | TGAGTCTTTC  |
| 11101 | TACTCAGGCA  | AGTGATGTTA  | TTACTAATCA  | AAGAAGTATT  | GCGACAACGG  | TTAATTTGCG  |
| 11161 | TGATGGACAG  | ACTCTTTTAC  | TCGGTGGCCT  | CACTGATTAT  | AAAACACTT   | CTCAGGATTC  |
| 11221 | TGGCGTACCG  | TTCTGTCTA   | AAATCCCTTT  | AATCGGCCTC  | CTGTTTAGCT  | CCCCTCTGA   |
| 11281 | TTCTAACGAG  | GAAAGCACGT  | TATACGTGCT  | CGTCAAAGCA  | ACCATAGTAC  | GCGCCCTGTA  |
| 11341 | GCGGCGCATT  | AAGCGCGGCG  | GGTGTGGTGG  | TTACGCGCAG  | CGTGACCGCT  | ACACTTGCCA  |
| 11401 | GCGCCCTAGC  | GCCCCTCCT   | TTCGCTTTCT  | TCCCCTCCTT  | TGTCGCCACG  | TTCGCCGGCT  |
| 11461 | TTCCCCGTCA  | AGCTCTAAAT  | CGGGGGCTCC  | CTTTAGGGTT  | CCGATTTAGT  | GCTTTACGGC  |
| 11521 | ACCTCGACCC  | CAAAAACTT   | GATTAGGGTG  | ATGGTTCACG  | TAGTGGGCCA  | TCGCCCTGAT  |
| 11581 | AGACGGTTTT  | TCGCCCTTTG  | ACGTTGGAGT  | CCACGTTCTT  | TAATAGTGGA  | CTCTTGTTCC  |
| 11641 | AAACTGGAAC  | AACACTCAAC  | CCTATCTCGG  | TCTATTCTTT  | TGATTTATAA  | GGGATTTTGC  |
| 11701 | CGATTTCCGC  | CTATTGGTTA  | AAAAATGAGC  | TGATTTAACA  | AAAATTTAAC  | GCGAATTTTA  |
| 11761 | ACAAAATATT  | AACGTTTACA  | ATTTAAATAT  | TTGCTTATAC  | AATCTTCCTG  | TTTTTTGGGGC |
| 11821 | TTTTCTGATT  | ATCAACCGGG  | GTACATATGA  | TTGACATGCT  | AGTTTTACGA  | TTACCGTTCA  |
| 11881 | TCGATTCTCT  | TGTTTGCTCC  | AGACTCTCAG  | GCAATGACCT  | GATAGCCTTT  | GTAGACCTCT  |
| 11941 | CAAAAATAGC  | TACCCTCTCC  | GGCATGAATT  | TATCAGCTAG  | AACGGTTGAA  | TATCATATTG  |
| 12001 | ATGGTGATTT  | GACTGTCTCC  | GGCCTTTCTC  | ACCCGTTTGA  | ATCTTTACCT  | ACACATTA    |
| 12061 | CAGGCATTGC  | ATTTAAAATA  | TATGAGGGTT  | CTAAAAATTT  | TTATCCTTGC  | GTTGAAATAA  |
| 12121 | AGGATTCTCC  | CGCAAAAAGTA | TTACAGGGTC  | ATAATGTTTT  | TGGTACAACC  | GATTTAGCTT  |
| 12181 | TATGCTCTGA  | GGCTTTATTG  | CTTAATTTTG  | CTAATTCTTT  | GCCTTGCCCTG | TATGATTTAT  |
| 12241 | TGGATGTTGG  | AANTTCCATT  | CGCCCTTCAG  | GCTGCGCAAC  | TGTTGGGAAG  | GGCGATCGGT  |
| 12301 | GCGGGCCTCT  | TCGCTATTAC  | GCCAGCTGGC  | GAAAGGGGGA  | TGTGCTGCAA  | GGCGATTAAG  |
| 12361 | TTGGGTAACG  | CCAGGGTTTT  | CCCAGTCACG  | ACGTTGTAAA  | ACGACGGCCA  | GTGCCAAGCT  |
| 12421 | TTTCAATTCA  | ATTCATCATT  | TTTTTTTTTAT | TCTTTTTTTT  | GATTTTCGGTT | TCTTTGAAAT  |
| 12481 | TTTTTTTGATT | CGGTAATCTC  | CGAACAGAAG  | GAAGAACGAA  | GGAAGGAGCA  | CAGACTTAGA  |
| 12541 | TTGGTATATA  | TACGCATATG  | TAGTGTTGAA  | GAAACATGAA  | ATTGCCCAGT  | ATTCTTAACC  |
| 12601 | CAACTGCACA  | GAACAAAAC   | CTGCAGGAAA  | CGAAGATAAA  | TCATGTCGAA  | AGCTACATAT  |
| 12661 | AAGGAACGTG  | CTGCTACTCA  | TCCTAGTCCT  | GTTGCTGCCA  | AGCTATTTAA  | TATCATGCAC  |
| 12721 | GAAAAGCAA   | CAAACCTGTG  | TGCTTCATTG  | GATGTTTCGTA | CCACCAAGGA  | ATTACTGGAG  |
| 12781 | TTAGTTGAAG  | CATTAGGTCC  | CAAAATTTGT  | TTACTAAAAA  | CACATGTGGA  | TATCTTGACT  |



12841 GATTTTTCCA TGGAGGGCAC AGTTAAGCCG CTAAAGGCAT TATCCGCCAA GTACAATTTT  
12901 TTACTCTTCG AAGACAGAAA ATTTGCTGAC ATTGGTAATA CAGTCAAATT GCAGTACTCT  
12961 GCGGGTGTAT ACAGAATAGC AGAATGGGCA GACATTACGA ATGCACACGG TGTGGTGGGC  
13021 CCAGGTATTG TTAGCGGTTT GAAGCAGGCG GCAGAAGAAG TAACAAAGGA ACCTAGAGGC  
13081 CTTTTGATGT TAGCAGAATT GTCATGCAAG GGCTCCCTAT CTA CTACTGGAGA ATATACTAAG  
13141 GGTACTGTTG ACATTGCGAA GAGCGACAAA GATTTTGTTA TCGGCTTTAT TGCTCAAAGA  
13201 GACATGGGTG GAAGAGATGA AGGTTACGAT TGGTTGATTA TGACACCCGG TGTGGGTTTA  
13261 GATGACAAGG GAGACGCATT GGGTCAACAG TATAGAACCG TGGATGATGT GGTCTCTACA  
13321 GGATCTGACA TTATTATTGT TGGAAAGAGGA CTATTTGCAA AGGGAAGGGA TGCTAAGGTA  
13381 GAGGGTGAAC GTTACAGAAA AGCAGGCTGG GAAGCATATT TGAGAAGATG CGGCCAGCAA  
13441 AACTAAAAAA CTGTATTATA AGTAAATGCA TGTATACTAA ACTCACAAAT TAGAGCTTCA  
13501 ATTTAATTAT ATCAGTTATT ACCCGATCAA AAATCATCGC TTCGCTGATT AATTACCCCA  
13561 GAAATAAGGC TAAAAAACTA ATCGCATTAT CATCCTATGG TTGTTAATTT GATTTCGTTCA  
13621 TTTGAAGGTT TGTGGGGCCA GGTTACTGCC AATTTTTCTT CTTCATAACC ATAAAAGCTA  
13681 GTATTGTAGA ATCTTTATTG TTCGGAGCAG TGCGGCGCGA GGCACATCTG CGTTTCAGGA  
13741 ACGCGACCGG TGAAGACGAG GACGCACGGA GGAGAGTCTT CCTTCGGAGG GCTG

//

|              |                     |                                                                                                                                                                                                                                          |     |        |             |
|--------------|---------------------|------------------------------------------------------------------------------------------------------------------------------------------------------------------------------------------------------------------------------------------|-----|--------|-------------|
| LOCUS        | pSBS2183            | 13588 bp                                                                                                                                                                                                                                 | DNA | linear | 15-JUN-2012 |
| FEATURES     | Location/Qualifiers |                                                                                                                                                                                                                                          |     |        |             |
| misc_feature | 5334..5389          | /note="MS2"                                                                                                                                                                                                                              |     |        |             |
| misc_feature | 5826..6296          | /note="CYC terminator"                                                                                                                                                                                                                   |     |        |             |
| misc_feature | 613..620            | /note="5' PBS"                                                                                                                                                                                                                           |     |        |             |
| misc_feature | 5503..5515          | /note="3' PBSA"                                                                                                                                                                                                                          |     |        |             |
| misc_feature | 5519..5530          | /note="3' PBSB"                                                                                                                                                                                                                          |     |        |             |
| misc_feature | 393..492            | /note="Partial U3"                                                                                                                                                                                                                       |     |        |             |
| misc_feature | 493..503            | /note="start of transcription "                                                                                                                                                                                                          |     |        |             |
| misc_feature | 493..543            | /note="R"                                                                                                                                                                                                                                |     |        |             |
| misc_feature | 544..610            | /note="U5"                                                                                                                                                                                                                               |     |        |             |
| misc_feature | 686..1306           | /note="Capsid"                                                                                                                                                                                                                           |     |        |             |
| CDS          | 686..1306           | /note=""                                                                                                                                                                                                                                 |     |        |             |
|              |                     | /translation="MSFMDQIPGGGNYPKLPVECLPNFPIQPSLTFRGRNDSHKLKNF<br>ISEIMLNMSMISWPNDASRIVYCRHLLNPAAQWANDFVQEQGILEITFDTFIQGLYQ<br>HFYKPPDINKIFNAITQLSEAKLGIERLNQFRKIWDRMPPDFMTEKAAIMTYTRLLT<br>KETYNIVRMHKPETLKDAMEEAYQTTALTERFFPGFELDADGDTIIG" |     |        |             |
| misc_feature | 1307..1384          | /note=""                                                                                                                                                                                                                                 |     |        |             |
| CDS          | 1307..1384          | /note=""                                                                                                                                                                                                                                 |     |        |             |
|              |                     | /translation="ATTHLQEEYDSYDSEDNLTQNGYVH"                                                                                                                                                                                                 |     |        |             |
| misc_feature | 1385..1558          | /note="Nucleocapsid"                                                                                                                                                                                                                     |     |        |             |
| CDS          | 1385..1558          | /note=""                                                                                                                                                                                                                                 |     |        |             |
|              |                     | /translation="TVRTRRSYNKPM SNHRNRRNNNPSREECIKNRLCFYCKKEGHRL<br>NECRARKASSNRS"                                                                                                                                                            |     |        |             |
| misc_feature | 1559..5327          | /note="POL3"                                                                                                                                                                                                                             |     |        |             |
| misc_feature | 5282..5327          | /note="U3"                                                                                                                                                                                                                               |     |        |             |
| misc_feature | 5568..5618          | /note="R"                                                                                                                                                                                                                                |     |        |             |
| misc_feature | 5576..5579          | /note="mapped end of transcript 1"                                                                                                                                                                                                       |     |        |             |
| misc_feature | 5597..5599          | /note="mapped end of transcript 2"                                                                                                                                                                                                       |     |        |             |
| misc_feature | 5609..5611          | /note="mapped end of transcript 3"                                                                                                                                                                                                       |     |        |             |
| misc_feature | 5616..5618          | /note="mapped end of transcript 4"                                                                                                                                                                                                       |     |        |             |
| misc_feature | 5619..5685          | /note="U5"                                                                                                                                                                                                                               |     |        |             |

```

misc_feature      5395..5567
                  /note="U3"
misc_feature      13589..13885
                  /note="GAL10"
source            1..13588
                  /dnas_title="pSBS2183"

```

ORIGIN

```

  1 GATCAAAAAT CATCGCTTCG CTGATTAATT ACCCCAGAAA TAAGGCTAAA AACTAATCG
 61 CATTATCATC CTATGGTTGT TAATTTGATT CGTTCATTTG AAGGTTTGTG GGGCCAGGTT
121 ACTGCCAATT TTTCTCTTTC ATAACCATAA AAGCTAGTAT TGTAGAATCT TTATTGTTCG
181 GAGCAGTGCG GCGCGAGGCA CATCTGCGTT TCAGGAACGC GACCGGTGAA GACGAGGACG
241 CACGGAGGAG AGTCTTCCTT CGGAGGGCTG TCACCCGCTC GGCGGCTTCT AATCCGTACT
301 TCAATATAGC AATGAGCAGT TAAGCGTATT ACTGAAAGTT CCAAAGAGAA GGTTTTTTTA
361 GGCTAAXXXX XXCTCGACTC TAGAGGATCC CCCTGAACTA CCCAAAGTAT AAATGCCTGA
421 ACAATTAGTT TAGATCCGAG ATTCGCGCTT TCCACCACTT AGTATGATTC ATATTTTATA
481 TAATATATAA GATAAGTAAC ATTCGCTGAA TTAATCTGAT AACTGTTTT GACAACCTGGT
541 TACTTCCCTA AGACTGTTTA TATTAGGATT GTCAAGACAC TCCGGTATTA CTCGAGCCCG
601 TAATACAAGC CCTGGTAGCG TTAAAGGTTA CTAATTGTTC AAACGAACA TCGAAAAGCC
661 GAACCTAGCT ACACCACACC CCAGTAGTGA CTTTATGGAT CAAATCCCAG GAGGAGGAAA
721 TTATCCAAAA CTCCCAGTAG AATGCCTTCC TAACTTCCCG ATCCAACCAT CTTTGACCTT
781 CAGAGGTAGA AATGACTCGC AATAACTGAA AAACTTTATC TCCGAAATAA TGTTAAACAT
841 GTCTATGATA TCTTGGCCGA ATGATGCCAG TCGTATTGTG TACTGCAGAA GACATTTATT
901 AAACCCCGCT GCTCAGTGGG CTAATGACTT TGTACAAGAA CAAGGTATAC TTGAAATAAC
961 ATTGCACACA TTCATACAAG GATTATATCA GCATTTCTAT AAGCCACCAG ATATCAATAA
1021 AATCTTTAAT GCAATCACGC AACTTTCCGA AGCTAAACTT GGTATTGAGC GTCTCAACCA
1081 ACGATTCAGA AAGATTTGGG ACAGAATGCC ACCAGACTTC ATGACCGAAA AAGCTGCCAT
1141 AATGACATAT ACTAGGCTAT TGACAAAGGA AACCTATAAT ATTGTCAGAA TGCACAAACC
1201 AGAGACATTA AAAGACGCCA TGGAAGAGGC TTACCAGACA ACTGCACTAA CTGAAAGATT
1261 CTTCCCAGGA TTCGAACTTG ATGCTGATGG AGACACTATC ATCGGTGCCA CAACCCACTT
1321 ACAAGAAGAA TACGACTCTG ACTATGATTC AGAAGATAAT CTGACCCAGA ATGGATACGT
1381 CCATACCGTA AGGACAAGAA GATCTTACAA TAAACCAATG TCAAATCATC GAAACAGGAG
1441 AAATAACAAC CCATCTAGAG AAGAATGTAT AAAAAATCGG CTATGCTTCT ATTGTAAGAA
1501 AGAGGGACAT CGCCTGAACG AATGTAGAGC ACGTAAGGCG AGTTCTAACC GATCTTGAAC
1561 TCGAATCAAA AGACCAACAA ACTCCTTTTA TCAAAACCTT ACCAATTGTA CACTATATCG
1621 CCATCCCCGA GATGGACAAT ACCGCCGAAA AAACCATAAA AATACAAAAC ACGAAAGTAA
1681 AAACCTGTT TGACAGTGGA TCACCCACGT CATTTATCCG AAGAGATATT GTAGAACTTC
1741 TCAAATACGA AATCTACGAG ACCCCTCCAC TCCGTTTTAG AGGATTCGTA GCCACCAAAT
1801 CCGCCGTTAC ATCCGAAGCA GTCACCATTG ACCTCAAAAT CAATGACCTG CATATAACTT
1861 TAGCCGCGTA CATACTGGAT AACATGGACT ACCAATTGTT AATTGGAAAT CCAATCTTAC
1921 GCCGCTACCC GAAAATCCTG CACACAGTAC TGAATACCAG AGAGAGCCCC GACTCCTTAA
1981 AGCCCAAGAC TTATCGCTCC GAAACCGTTA ATAACGTTAG AACCTACTCC GCTGGTAATC
2041 GTGGTAACCC CAGAAACATA AAACGTGCTT TTGCCCCAC CATTCTCGAA GCAACTGACC
2101 CGAAATCCGC TGGTAATCGT GGTGACTCCA GAACCAAAAC CCTGTCTCTT GCAACCACTA
2161 CTCCTGCAGC AATTGACCCG CTTACGACCC TTGATAACCC AGGTAGTACT CAAAGTACAT
2221 TTGCGCAATT CCCGATACCT GAAGAAGCGA GCATCCTAGA AGAGGATGGA AAATACTCCA
2281 ACGTTGTCTC AACCATTCAG AGTGTAGAAC CTAATGCTAC TGATCACAGC AATAAGGACA
2341 CTTTTTGCAC TTTGCCAGTT TGGTTACAAC AGAAGTATAG AGAGATCATA CGTAATGATC
2401 TCCCACCAAG ACCTGCCGAC ATTAATAACA TCCCCGTAAA ACATGATATT GAAATAAAC
2461 CTGGCCAAAG ACTACCTCGA CTACAGCCAT ACCATGTTAC AGAAAAGAAC GAAACAAGAAA
2521 TCAACAAAAT AGTTCAAAAA CTGCTCGATA ACAAAGTTCAT TGTTCCCTCA AAGTCGCCCTT
2581 GCAGCTCCCC TGTAGTCCCTC GTCCCGAAGA AAGACGGTAC CTTCCGACTC TGCGTCGATT
2641 ACCGCACCCT GAACAAAAGCT ACCATCTCCG ACCCATTCCC ATTACCCAGA ATCGACAACC
2701 TATTGAGCCG TATTGAAAAAT GCCCAGATAT TTACCACGCT AGATTTGCAT AGTGGTTACC
2761 ACCAGATCCC GATGGAACCC AAAGACCGCT ACAAACCCGC CTTTGTACACA CCATCCGGTA
2821 AGTATGAATA TACCGTCATG CCATTTGGCT TAGTCAATGC ACCTAGTACA TTCGCAAGAT

```

2881 ACATGGCTGA TACATTTAGA GACCTGAGAT TCGTCAATGT TTACCTTGAT GATATATTA  
2941 TATTCCTCCGA ATCTCCAGAA GAACATTGGA AACATTTAGA CACGGTACTA GAAAGATTA  
3001 AGAACGAGAA CCTCATTGTT AAGAAGAAAA AATGTAAAT TGCATCTGAA GAAACTGAGT  
3061 TTTTAGGCTA TAGTATTGGA ATCCAGAAAA TAGCTCCACT ACAGCACAAA TGTGCAGCAA  
3121 TCCGAGACTT TCCGACGCCT AAAACAGTAA AACAAGCACA GAGATTTTTA GGAATGATTA  
3181 ATTACTACAG ACGATTCATT CCAAATTGCT CCAAGATTGC ACAGCCAATC CAACTGTTTA  
3241 TTTGTGACAA AAGTCAATGG ACAGAAAAAC AAGACAAGGC AATTGATAAA CTAAAAGACG  
3301 CCTTGTGTAA CTCCCCCGTC CTAGTACCAT TCAACAACAA AGCAAACACTAC CGACTTACAA  
3361 CAGACGCCTC AAAAGACGGC ATTGGTGCTG TTCTAGAAGA AGTCGACAAC AAGAACAAC  
3421 TTGTTGGTGT CGTCGGTTAC TTCTCTAAAT CCTTAGAGAG TGCCAGAAA AACTATCCTG  
3481 CTGGCGAATT AGAACTACTT GGAATTATCA AAGCACTCCA CCACTTCCGA TATATGCTTC  
3541 ACGGAAAGCA TTTCACGTTA AGAACAGACC ACATTAGTTT GTTATCATTA CAAAAAAGA  
3601 ACGAACCCGA CGAACGCGTG CAACGCTGGT TAGATGACCT AGCCACATAT GACTTCACCT  
3661 TAGAATACCT AGCTGGACCC AAGAACGTTG TCGCAGATGC CATATCCCCT GCGTATATA  
3721 CTATAACCCC CGAAACATCC CGACCTATCG ACACAGAAAAG CTGGAAATCT TACTACAAAT  
3781 CAGACCCATT ATGTAGTGCT GTCTTAATTC ATATGAAAAG ATTGACACAA CACAACGTCA  
3841 CACCTGAAGA TATGTCAGCC TTCCGTAGTT ACCAGAAGAA ACTCGAACTA TCAGAGACCT  
3901 TCCGAAAGAA TTATTCCCTA GAAGACGAAA TGATCTATTA CCAAGACCGA CTAGTAGTAC  
3961 CAATAAAACA ACAGAACGCA GTTATGAGAC TATATCATGA CCATACCTTA TTTGGAGGAC  
4021 ATTTTGGTGT AACAGTGACC CTTGCGAAAA TCAGCCCAAT TTACTATTGG CAAAAATTAC  
4081 AACATTCGAT CATAACAATC ATCAGGACCT CGGTACAATG TCAACTAATA AAATCACACC  
4141 GACCACGCTT ACATGGACTA TTACAACCAC TCCCTATAGC AGAAGGAAGA TGGCTTGATA  
4201 TATCAATGGA TTTTGTGACA GGATTACCCC CGACATCAAA TAACTTGAAT ATGATCCTCG  
4261 TCGTAGTTGA TCGTTTTTCG AAACGCGCTC ACTTCATAGC TACAAGGAAA ACCTTAGACG  
4321 CAACACAACT AATAGATCTA CTCTTTCGAT ACATTTTTTC ATATCATGGT TTTCCAGGA  
4381 CAATAACCAG TGATAGAGAT GTCCGTATGA CCGCCGACAA ATATCAAGAA CTCACGAAAA  
4441 GACTAGGAAT AAAATCGACA ATGTCTTCCG CGAACCCACC CCAAACAGAT GGACAATCCG  
4501 AACGAACGAT ACAGACATTA AACAGTTAC TAAGAGCCTA TGCTTCAACC AATATTCAGA  
4561 ATTGGCATGT ATATTTACCA CAAATCGAAT TTGTTTACAA TTCTACACCT ACTAGAACAC  
4621 TTGGAAAATC ACCATTTGAA ATTGATTTAG GATATTTACC GAATACCCCT GCTATTAAGT  
4681 CAGATGACGA AGTCAACGCA AGAAGTTTTA CTGCCGTAGA ACTTGCCAAA CACCTCAAAG  
4741 CCCTTACCAT CCAAACGAAG GAACAGCTAG AACACGCTCA AATCGAAATG GAAACTAATA  
4801 ACAATCAAAG ACGTAAACCC TTATTGTTAA ACATAGGAGA TCACGTATTA GTGCATAGAG  
4861 ATGCATACTT CAAGAAAGGT GCTTATATGA AAGTACAACA AATATACGTC GGACCATTTT  
4921 GAGTTGTCAA GAAAATAAAC GATAACGCCT ACGAACTAGA TTTAAACTCT CACAAGAAAA  
4981 AGCACAGAGT TATTAATGTA CAATTCCTGA AAAAGTTTGT ATACCGTCCA GACGCGTACC  
5041 CAAAGAATAA ACCAATCAGC TCCACTGAAA GAATTAAGAG AGCACACGAA GTTACTGCAC  
5101 TCATAGGAAT AGATACTACA CAAAAACTT ACTTATGTCA CATGCAAGAT GTAGACCCAA  
5161 CACTTTCAGT AGAATACTCA GAAGCTGAAT TTTGCCAAAT TCCCGAAAGA ACACGAAGAT  
5221 CAATATTAGC CAACTTTAGA CAACTCTACG AAACACAAGA CAACCCTGAG AGAGAGGAAG  
5281 ATGTTGTATC TCAAAATGAG ATATGTCAGT ATGACAATAC GTCACCCGGC TGAACATGAG  
5341 GATCACCCAT GTCTGCGGTC GACTCTAGAA ACATGAGGAT CACCCATGTC CGGGACGTTT  
5401 ATAAAACACA TATGAAACAA CCTTATAACA AAACGAACAA CATGAGACAA AACCAGACCT  
5461 TCCCTAGCTG AACTACCCAA AGTATAAATG CCTGAACAAT TAGTTTAGAT CCGAGATTC  
5521 GCGCTTCCAC CACTTAGTAT GATTCATATT TTATATAATA TATAAGATAA GTAACATTC  
5581 GTGAATTAAT CTGATAAACT GTTTTGACAA CTGGTTACTT CCCTAAGACT GTTTATATTA  
5641 GGATTGTCAA GACTCCGG TATTACTCGA GCCCGTAATA CAACAGAAAG TTCCATTTTG  
5701 GATGCTCTAT TTATGGGAAT ATGACTATAC GAATGTCACC CACGATGGCC GGAGTAGCTG  
5761 TGATGAGCAT CTTTTGTCT GTGGCGCTTA AAACGTGAGC AAAATTGTAC TGTAATAATTAC  
5821 TTACGTATCA ATGGAAGTGT GTGAATTTTCG TGATAAAAT ATTGTGAGAA TAGTGACTTC  
5881 ATTATTCCTT ATAACCTAAC ATTAGGATCA TATAAGTAAT CAGATGCAGT TCGTCATTAA  
5941 TATGTCAGGA TGGATAACCA TAGGTAAGCA CGTGATTATG GAAGGACAGT AAAGTTACCG  
6001 ATCTACTTTT TTGAATGATC AACTTGGTGT TTTTCATCTAT AAGGATATGG GTCGTTACAT  
6061 TGAAACTATA GTAAAAGATC TCGTTATTGG TATATCGGTC ATAATGAAGA TGAAAATAGTC  
6121 GGTATGTATT TTTATACCCC CCCCTATATG GTAAAAAGGT TAAGATTCAT ATTTAAATCT

|      |             |             |            |            |             |             |
|------|-------------|-------------|------------|------------|-------------|-------------|
| 6181 | TCATTAATAC  | CACCTCTAAT  | TTCTAATTAC | CAACATTTTT | AACTCCACTT  | TTATTATATG  |
| 6241 | CTATATACAA  | CATTATGTAA  | AAGGAGTATA | CCAAAAATTC | TCCTTCATAA  | TATAGGGAAT  |
| 6301 | TCCACGGACT  | ATAGACTATA  | CTAGTATACT | CCGTCTACTG | TACGATACAC  | TTCCGCTCAG  |
| 6361 | GTCCTTGTCC  | TTTAACGAGG  | CCTTACCCT  | CTTTTGTTAC | TCTATTGATC  | CAGCTCAGCA  |
| 6421 | AAGGCAGTGT  | GATCTAAGAT  | TCTATCTTCG | CGATGTAGTA | AAACTAGCTA  | GACCGAGAAA  |
| 6481 | GAGACTAGAA  | ATGCAAAAGG  | CACTTCTACA | ATGGCTGCCA | TCATTATTAT  | CCGATGTGAC  |
| 6541 | GCTGCAGCTT  | CTCAATGATA  | TTCGAATACG | CTTTGAGGAG | ATACAGCCTA  | ATATCCGACA  |
| 6601 | AACTGTTTTA  | CAGATTTACG  | ATCGTACTTG | TTACCCATCA | TTGAATTTTG  | AACATCCGAA  |
| 6661 | CCTGGGAGTT  | TTCCCTGAAA  | CAGATAGTAT | ATTTGAACCT | GTATAATAAT  | ATATAGTCTA  |
| 6721 | GCGCTTTACG  | GAAGACAATG  | TATGTATTTT | GGTTCCTGGA | GAAACTATTG  | CATCTATTGC  |
| 6781 | ATAGGTAATC  | TTGCACGTCG  | CATCCCCGGT | TCATTTTCTG | CGTTTCCATC  | TTGCACTTCA  |
| 6841 | ATAGCATATC  | TTTGTTAACG  | AAGCATCTGT | GCTTCATTTT | GTAGAACAAA  | AATGCAACGC  |
| 6901 | GAGAGCGCTA  | ATTTTTCAAA  | CAAAGAATCT | GAGCTGCATT | TTTACAGAAC  | AGAAATGCAA  |
| 6961 | CGCGAAAGCG  | CTATTTTACC  | AACGAAGAAT | CTGTGCTTCA | TTTTTGTAAA  | ACAAAAATGC  |
| 7021 | AACGCGAGAG  | CGCTAATTTT  | TCAAACAAAG | AATCTGAGCT | GCATTTTTTAC | AGAACAGAAA  |
| 7081 | TGCAACGCGA  | GAGCGCTATT  | TTACCAACAA | AGAATCTATA | CTTCTTTTTT  | GTTCTACAAA  |
| 7141 | AATGCATCCC  | GAGAGCGCTA  | TTTTTCTAAC | AAAGCATCTT | AGATTACTTT  | TTTTCTCCTT  |
| 7201 | TGTGCGCTCT  | ATAATGCAGT  | CTCTTGATAA | CTTTTTGCAC | TGTAGGTCG   | TTAAGGTTAG  |
| 7261 | AAGAAGGCTA  | CTTTGGTGTC  | TATTTTCTCT | TCCATAAAAA | AAGCCTGACT  | CCATTTCCCG  |
| 7321 | CGTTTACTGA  | TTACTAGCGA  | AGTTGCGGGT | GCATTTTTTC | AAGATAAAGG  | CATCCCCGAT  |
| 7381 | TATATTCTAT  | ACCGATGTGG  | ATTGCGCATA | CTTTGTGAAC | AGAAAGTGAT  | AGCGTTGATG  |
| 7441 | ATCTTTCATT  | GGTCAGAAAA  | TTATGAACGG | TTTCTTCTAT | TTTGTCTCTA  | TATACTACGT  |
| 7501 | ATAGGAAATG  | TTTACATTTT  | CGTATTGTTT | TGCATTCACT | CTATGAATAG  | TTCTTACTAC  |
| 7561 | AATTTTTTTT  | TCTAAAAGAGT | AATACTAGAG | ATAAACATAA | AAAATGTAGA  | GGTCGAGTTT  |
| 7621 | AGATGCAAGT  | TCAAGGAGCG  | AAAGGTGGAT | GGGTAGGTTA | TATAGGGATA  | TAGCACAGAG  |
| 7681 | ATATATAGCA  | AAGAGATACT  | TTTGAGCAAT | GTTTGTGGAA | GCGGTATTTC  | CAATATTTTA  |
| 7741 | GTAGCTCGTT  | ACAGTCCGGT  | GCGTTTTTGG | TTTTTTGAAA | GTGCGTCTTC  | AGAGCGCTTT  |
| 7801 | TGGTTTTTCAA | AAGCGCTCTG  | AAGTTCCTAT | ACTTCTAGA  | GAATAGGAAC  | TTCCGGAATAG |
| 7861 | GAAC TTCAAA | GCGTTTCCGA  | AAACGAGCGC | TTCCGAAAAT | GCAACGCGAG  | CTGCGCACAT  |
| 7921 | ACAGCTCACT  | GTTACGTCG   | CACCTATATC | TGCGTGTTC  | CTGTATATAT  | ATATACATGA  |
| 7981 | GAAGAACGGC  | ATAGTGCGTG  | TTTATGCTTA | AATGCGTACT | TATATGCGTC  | TATTTATGTA  |
| 8041 | GGATGAAAGG  | TAGTCTAGTA  | CCTCCTGTGA | TATTATCCCA | TTCCATGCGG  | GGTATCGTAT  |
| 8101 | GCTTCCTTCA  | GCACTACCCT  | TTAGCTGTTC | TATATGCTGC | CACTCCTCAA  | TTGGATTAGT  |
| 8161 | CTCATCCTTC  | AATGCTATCA  | TTTTCTTTGA | TATTGGATCA | TATGCATAGT  | ACCGAGAAAC  |
| 8221 | TAGTGCGAAG  | TAGTGATCAG  | GTATTGCTGT | TATCTGATGA | GTATACGTTG  | TCCTGGCCAC  |
| 8281 | GGCAGAAGCA  | CGCTTATCGC  | TCCAATTTCC | CACAACATTA | GTCAACTCCG  | TTAGGCCCTT  |
| 8341 | CATTGAAAGA  | AATGAGGTC   | TCAAATGTCT | TCCAATGTGA | GATTTTGGGC  | CATTTTTTAT  |
| 8401 | AGCAAAGATT  | GAATAAGGCG  | CATTTTTCTT | CAAAGCTTTA | TTGTACGATC  | TGACTAAGTT  |
| 8461 | ATCTTTTAAT  | AATTGGTATT  | CCTGTTTATT | GCTTGAAGAA | TTGCCGGTCC  | TATTTACTCG  |
| 8521 | TTTTAGGACT  | GGTTCAGAA   | TCGGTCTCCC | TATAGTGAGT | CGTATTAATT  | CGATATCCGT  |
| 8581 | AATCATGGTC  | ATAGCTGTTT  | CCTGTGTGAA | ATTGTTATCC | GCTCACAAAT  | CCACACAACA  |
| 8641 | TACGAGCCGG  | AAGCATAAAG  | TGTAAGCCCT | GGGGTGCCTA | ATGAGTGAGC  | TAACTCACAT  |
| 8701 | TAATTGCGTT  | GCGCTCACTG  | CCCGCTTTCC | AGTCGGGAAA | CCTGTGCTGC  | CAGCTGCATT  |
| 8761 | AATGAATCGG  | CCAACGCGCG  | GGGAGAGGCG | GTTTGCATAT | TGGGCGCTCT  | TCCGCTTCCT  |
| 8821 | CGTCACTGA   | CTCGCTGCGC  | TCGGTCTGTT | GGCTGCGGCG | AGCGGTATCA  | GCTCACTCAA  |
| 8881 | AGGCGGTAAT  | ACGGTTATCC  | ACAGAATCAG | GGGATAACGC | AGGAAAGAAC  | ATGTGAGCAA  |
| 8941 | AAGGCCAGCA  | AAAGGCCAGG  | AACCGTAAAA | AGGCCGCTTT | GCTGGCGTTT  | TTCCATAGGC  |
| 9001 | TCCGCCCCCC  | TGACGAGCAT  | CACAAAAATC | GACGCTCAAG | TCAGAGGTGG  | CGAAACCCGA  |
| 9061 | CAGGACTATA  | AAGATAACCAG | GCGTTTTCCC | CTGGAAGCTC | CCTCGTGCGC  | TCTCTGTTTC  |
| 9121 | CGACCCTGCC  | GCTTACCGGA  | TACCTGTCCG | CCTTCTCTCC | TTCGGGAAGC  | GTGGCGTTTT  |
| 9181 | CTCATAGCTC  | ACGCTGTAGG  | TATCTCAGTT | CGGTGTAGGT | CGTTCGCTCC  | AAGCTGGGCT  |
| 9241 | GTGTGCACGA  | ACCCCCCGTT  | CAGCCCGACC | GCTGCGCCTT | ATCCGGTAAC  | TATCGTCTTG  |
| 9301 | AGTCCAACCC  | GGTAAAGACAC | GACTTATCGC | CACTGGCAGC | AGCCACTGGT  | AACAGGATTA  |
| 9361 | GCAGAGCGAG  | GTATGTAGGC  | GGTGCTACAG | AGTTCTTGAA | GTGGTGGCCT  | AACTACGGCT  |
| 9421 | ACACTAGAAG  | GACAGTATTT  | GGTATCTGCG | CTCTGCTGAA | GCCAGTTACC  | TTCCGAAAAA  |

9481 GAGTTGGTAG CTCTTGATCC GGCAAACAAA CCACCGCTGG TAGCGGTGGT TTTTTTGT  
 9541 GCAAGCAGCA GATTACGCGC AGAAAAAAG GATCTCAAGA AGATCCTTTG ATCTTTTCTA  
 9601 CGGGGTCTGA CGCTCAGTGG AACGAAAAC CACGTTAAGG GATTTTGGTC ATGAGATTAT  
 9661 CAAAAGGAT CTTCACCTAG ATCCTTTTAA ATTAATAATG AAGTTTTAAA TCAATCTAAA  
 9721 GTATATATGA GTAAACTTGG TCTGACAGTT ACCAATGCTT AATCAGTGAG GCACCTATCT  
 9781 CAGCGATCTG TCTATTTCTG TCATCCATAG TTGCCTGACT CCCCCTCGTG TAGATAACTA  
 9841 CGATACGGGA GGGCTTACCA TCTGGCCCA GTGCTGCAAT GATACCGCGA GACCCACGCT  
 9901 CACCGGCTCC AGATTTATCA GCAATAAAC AGCCAGCCGG AAGGGCCGAG CGCAGAAGTG  
 9961 GTCCTGCAAC TTTATCCGCC TCCATCCAGT CTATTAATTG TTGCCGGGAA GCTAGAGTAA  
 10021 GTAGTTCGCC AGTTAATAGT TTGCGCAACG TTGTTGCCAT TGCTACAGGC ATCGTGGTGT  
 10081 CACGCTCGTC GTTTGGTATG GCTTCATTCA GCTCCGGTTC CCAACGATCA AGGCGAGTTA  
 10141 CATGATCCCC CATGTTGTGC AAAAAAGCGG TTAGCTCCTT CGGTCCTCCG ATCGTTGTCA  
 10201 GAAGTAAGTT GGCCGCAAGT TTATCACTCA TGGTTATGGC AGCACTGCAT AATCCTCTTA  
 10261 CTGTCATGCC ATCCGTAAGA TGCTTTTCTG TGAAGTGGTA GTACTCAACC AAGTCATTCT  
 10321 GAGAATAGTG TATGCGGCGA CCGAGTTGGT CTTGCCCGGC GTCAATACGG GATAATACCG  
 10381 CGCCACATAG CAGAACTTTA AAAGTGCTCA TCATTGGAAC ACGTTCTTCG GGGCGAAAAC  
 10441 TCTCAAGGAT CTTACCGCTG TTTAGATCCA GTTCGATGTA ACCCACTCGT GCACCCAAC  
 10501 GATCTCAGC ATCTTTACT TTCACCAGCG TTTCTGGGTG AGCAAAAACA GGAAGGCAAA  
 10561 ATGCCGAAA AAAGGGAATA AGGGCGACAC GGAAATGTTG AATACTATA CTCTTCCTTT  
 10621 TTCAATATTA TTGAAGCATT TATCAGGGTT ATGTCTCAT GAGCGGATAC ATATTTGAAT  
 10681 GTATTTAGAA AAATAAACAA ATAGGGGTTT CCGGCACATT TCCCCGAAA GTGCCACCTG  
 10741 ACGTCTAAGA AACCATTATT ATCATGACAT TAACCTATAA AAATAGGCGT ATCACGAGGC  
 10801 CCTTTCGTCT CGCGCGTTTC GGTGATGACG GTGAAAACCT CTGACACATG CAGCTCCCGG  
 10861 AGACGGTCAC AGCTTGTCTG TAAGCGGATG CCGGGAGCAG ACAAGCCCCT CAGGGTGCCT  
 10921 CAGCGGGTGT TGGCGGGTGT CGGGGCTGGC TTAACTATGC GGCATCAGAG CAGATTGTAC  
 10981 TGAGAGTGCA CCATATGCGG TGTGAAATAC CGCACAGATG CGTAAGGAGA AAATACCGCA  
 11041 TCAGGAANTT CCAGACGATT GAGCGTCAAA ATGTAGGTAT TTCCATGAGC GTTTTTCTCTG  
 11101 TTGCAATGGC TGGCGGTAAT ATTGTTCTGG ATATTACCAG CAAGGCCGAT AGTTTGAGTT  
 11161 CTTCTACTCA GGCAAGTGAT GTTATTACTA ATCAAAGAAG TATTGCGACA ACGGTTAATT  
 11221 TGCCTGATGG ACAGACTCTT TTACTCGGTG GCCTCACTGA TTATAAAAAC ACTTCTCAGG  
 11281 ATTCTGGCGT ACCGTTCCCTG TCTAAAATCC CTTTAATCGG CCTCCTGTTT AGCTCCCGCT  
 11341 CTGATTCTAA CGAGGAAAGC ACGTTATACG TGCTCGTCAA AGCAACCATA GTACGCGCCC  
 11401 TGTAGCGGCG CATTAAAGCGC GCGGGGTGTG GTGGTTACGC GCAGCGTGAC CGCTACACTT  
 11461 GCCAGCGCCC TAGCGCCCGC TCCTTTCGCT TTCTTCCCT CTTTTGTGCG CACGTTGCGC  
 11521 GGCTTTCCCC GTCAAGCTCT AAATCGGGGG CTCCCTTTAG GGTTCGGATT TAGTGCTTTA  
 11581 CGGCACCTCG ACCCCAAAAA ACTTGATTAG GGTGATGGTT CACGTAGTGG GCCATCGCCC  
 11641 TGATAGACGG TTTTTCGCCC TTTGACGTTG GAGTCCACGT TCTTTAATAG TGGACTCTTG  
 11701 TTCCAAACTG GAACAACACT CAACCCTATC TCGGTCTATT CTTTTGATTT ATAAGGGATT  
 11761 TTGCCGATTT CGGCCTATTG GTTAAAAAAT GAGCTGATTT AACAAAAATT TAACGCGAAT  
 11821 TTTAACAAA TATTAACGTT TACAATTTAA ATATTTGCTT ATACAATCTT CCTGTTTTTG  
 11881 GGGCTTTTCT GATTATCAAC CGGGGTACAT ATGATTGACA TGCTAGTTTT ACGATTACCG  
 11941 TTCATCGATT CTCTTGTTTG CTCCAGACTC TCAGGCAATG ACCTGATAGC CTTTGTAGAC  
 12001 CTC TCAAAA TAGCTACCTT CTCCGGCATG AATTTATCAG CTAGAACGGT TGAATATCAT  
 12061 ATTGATGGTG ATTTGACTGT CTCCGGCCTT TCTCACCCGT TTGAATCTTT ACCTACACAT  
 12121 TACTCAGGCA TTGCATTTAA AATATATGAG GGTCTAAAA ATTTTTATCC TTGCGTTGAA  
 12181 ATAAAGGATT CTCCCGCAA AGTATTACAG GGTCAATATG TTTTTGGTAC AACCGATTTA  
 12241 GCTTTATGCT CTGAGGCTTT ATTGCTTAAT TTTGCTAAT CTTTGCCTTG CCTGTATGAT  
 12301 TTATTGGATG TTGGAANTC CATTCCGCTT TCAGGCTGCG CAACTGTTGG GAAGGCGAT  
 12361 CGGTGCGGGC CTCTTCGCTA TTACGCCAGC TGGCGAAAGG GGGATGTGCT GCAAGGCGAT  
 12421 TAAGTTGGGT AACGCCAGG TTTTCCCAGT CACGACGTTG TAAAACGACG GCCAGTGCCA  
 12481 AGCTTTTCAA TTCAATTCAT CTTTTTTTTT TTATTCTTTT TTTTGATTTT GGTTCCTTTG  
 12541 AAATTTTTTTT GATTCCGTTA TCTCCGAACA GAAGGAAGAA CGAAGGAAGG AGCACAGACT  
 12601 TAGATTGGTA TATATACGCA TATGTAGTGT TGAAGAAACA TGAAATTGCC CAGTATTCTT  
 12661 AACCCAACTG CACAGAACAA AAACCTGCAG GAAACGAAGA TAAATCATGT CGAAAGCTAC  
 12721 ATATAAGGAA CGTGCTGCTA CTCATCCTAG TCCTGTTGCT GCCAAGCTAT TTAATATCAT

12781 GCACGAAAAG CAAACAAACT TGTGTGCTTC ATTGGATGTT CGTACCACCA AGGAATTACT  
12841 GGAGTTAGTT GAAGCATTAG GTCCCAAAAT TTGTTTACTA AAAACACATG TGGATATCTT  
12901 GACTGATTTT TCCATGGAGG GCACAGTTAA GCCGCTAAAG GCATTATCCG CCAAGTACAA  
12961 TTTTTTACTC TTCGAAGACA GAAAATTTGC TGACATTGGT AATACAGTCA AATTGCAGTA  
13021 CTCTGCGGGT GTATACAGAA TAGCAGAATG GGCAGACATT ACGAATGCAC ACGGTGTGGT  
13081 GGGCCCAGGT ATTGTTAGCG GTTTGAAGCA GGCGGCAGAA GAAGTAACAA AGGAACCTAG  
13141 AGGCCTTTTG ATGTTAGCAG AATTGTCATG CAAGGGCTCC CTATCTACTG GAGAATATAC  
13201 TAAGGGTACT GTTGACATTG CGAAGAGCGA CAAAGATTTT GTTATCGGCT TTATTGCTCA  
13261 AAGAGACATG GGTGGAAGAG ATGAAGGTTA CGATTGGTTG ATTATGACAC CCGGTGTGGG  
13321 TTTAGATGAC AAGGGAGACG CATTGGGTCA ACAGTATAGA ACCGTGGATG ATGTGGTCTC  
13381 TACAGGATCT GACATTATTA TTGTTGGAAG AGGACTATTT GCAAAGGGAA GGGATGCTAA  
13441 GGTAGAGGGT GAACGTTACA GAAAAGCAGG CTGGGAAGCA TATTTGAGAA GATGCGGCCA  
13501 GCAAACTAA AAAACTGTAT TATAAGTAAA TGCATGTATA CTAAACTCAC AAATTAGAGC  
13561 TTCAATTTAA TTATATCAGT TATTACCC

//

```

FEATURES             Location/Qualifiers
     misc_feature    1..393
                     /note="Gal Promoter"
     misc_feature    396..406
                     /note="start of transcription "
     misc_feature    396..446
                     /note="R"
     misc_feature    447..513
                     /note="U5"
     misc_feature    516..523
                     /note="5' PBS"
     misc_feature    589..1209
                     /note="Capsid"
     CDS             589..1209
                     /note=""
                     /translation="MSFMDQIPGGGNYPKLPVECLPNFPIQPSLTFRGRNDSHKLNFI
ISEIMLNMSMISWPNDASRIVYCRRHLLNPAAQWANDFVQEQGILEITFDTFIQGLYQ
HFYKPPDINKIFNAITQLSEAKLGIERLNQRFRKIWDRMPPDFMTEKAAIMTYTRLLT
KETYNIVRMHKPETLKDAMEEAYQTTALTERFFPGFELDADGDTIIG"
     misc_feature    1210..1287
                     /note=""
     CDS             1210..1287
                     /note=""
                     /translation="ATTHLQEEYDSYDSEDNLTQNGYVH"
     misc_feature    1288..1461
                     /note="Nucleocapsid"
     CDS             1288..1461
                     /note=""
                     /translation="TVRTRRSYNKPMNSHRNRNNNPSREECIKNRLCFYCKKEGHRL
NECRARKASSNRS"
     misc_feature    1462..5230
                     /note="POL3"
     misc_feature    5185..5230
                     /note="U3"
     misc_feature    5237..5292
                     /note="MS2"
     misc_feature    5678..5925
                     /note="CYC terminator"
     misc_feature    5298..5470
                     /note="U3"
     misc_feature    5406..5418
                     /note="3' PBSA"
     misc_feature    5422..5433
                     /note="3' PBSB"
     misc_feature    5471..5521
                     /note="R"
     misc_feature    5479..5482
                     /note="mapped end of transcript 1"
     misc_feature    5500..5502
                     /note="mapped end of transcript 2"
     misc_feature    5512..5514
                     /note="mapped end of transcript 3"
     misc_feature    5519..5521

```



```

/note="mapped end of transcript 4"
misc_feature 5522..5588
/note="U5"
misc_feature 5845..5851
/note="transcription end"
source 1..10927
/dnas_title="pKC3700"

```

ORIGIN

```

 1 ACGGATTAGA AGCCGCCGAG CGGGTGACAG CCCTCCGAAG GAAGACTCTC CTCCGTGCGT
61 CCTCGTCTTC ACCGGTCGCG TTCCTGAAAC GCAGATGTGC CTCGCGCCGC ACTGCTCCGA
121 ACAATAAAGA TTCTACAATA CTAGCTTTTA TGGTTATGAA GAGGAAAAAT TGGCAGTAAC
181 CTGGCCCCAC AAACCTTCAA ATGAACGAAT CAAATTAACA ACCATAGGAT GATAATGCGA
241 TTAGTTTTTT AGCCTTATTT CTGGGGTAAT TAATCAGCGA AGCGATGATT TTTGATCTAT
301 TAACAGATAT ATAAATGCAA AAACCTGCATA ACCACTTTAA CTAATACTTT CAACATTTTC
361 GGTTTGTATT ACTTCTTATT CAAATGTAAT AAAGATAAGT AACATTCCGT GAATTAATCT
421 GATAAACTGT TTTGACAAC TTTACTTCC CTAAGACTGT TTATATTAGG ATTGTCAGA
481 CACTCCGGTA TTAAGTCACT CCGTAATACA ACACCTGGTA GCGTTAAAGG TTACTAATTG
541 TTCAAACGAA CCATCGAAAA GCCGAACCTA GCTACACCAC ACCCCAGTAT GAGCTTTATG
601 GATCAAATCC CAGGAGGAGG AAATTTATCCA AAACCTCCAG TAGAATGCCT TCCTAACTTC
661 CCGATCCAAC CATCTTTGAC CTTCAAGAGT AGAAATGACT CGCATAAACT GAAAAACTTT
721 ATCTCCGAAA TAATGTTAAA CATGTCTATG ATATCTTGGC CGAATGATGC CAGTCGTATT
781 GTGTACTGCA GAAGACATTT ATTAACCCC GCTGCTCAGT GGGCTAATGA CTTTGTACAA
841 GAACAAGGTA TACTTGAAAT AACATTCGAC ACATTCATAC AAGGATTATA TCAGCATTTT
901 TATAAGCCAC CAGATATCAA TAAAATCTTT AATGCAATCA CGCAACTTTC CGAAGCTAAA
961 CTTGGTATTG AGCGTCTCAA CCAACGATTC AGAAAGATTT GGGACAGAAT GCCACCAGAC
1021 TTCATGACCG AAAAAGCTGC CATAATGACA TATACTAGGC TATTGACAAA GGAAACCTAT
1081 AATATTGTCA GAATGCACAA ACCAGAGACA TTAAAAGACG CCATGGAAGA GGCTTACCAG
1141 ACAACTGCAC TAACTGAAAG ATTCTTCCCA GGATTCGAAC TTGATGCTGA TGGAGACACT
1201 ATCATCGGTG CCACAACCCA CTTACAAGAA GAATACGACT CTGACTATGA TTCAGAAGAT
1261 AATCTGACCC AGAATGGATA CGTCCATACC GTAAGGACAA GAAGATCTTA CAATAAACCA
1321 ATGTCAAATC ATCGAAACAG GAGAAATAAC AACCCATCTA GAGAAGAATG TATAAAAAAT
1381 CGGCTATGCT TCTATTGTAA GAAAGAGGGA CATCGCCTGA ACGAATGTAG AGCACGTAAG
1441 GCGAGTTCTA ACCGATCTTG AACTCGAATC AAAAGACCAA CAAACTCCTT TTATCAAAC
1501 CTTACCAATT GTACACTATA TCGCCATCCC CGAGATGGAC AATACCGCCG AAAAAACCAT
1561 AAAAATACAA AACACGAAAG TAAAAACCTT GTTTGACAGT GGATCACCCA CGTCATTTAT
1621 CCGAAGAGAT ATTGTAGAAC TTCTCAAATA CGAAATCTAC GAGACCCCTC CACTCCGTTT
1681 TAGAGGATTC GTAGCCACCA AATCCGCCGT TACATCCGAA GCAGTCACCA TTGACCTCAA
1741 AATCAATGAC CTGCATATAA CTTTAGCCGC GTACATACTG GATAACATGG ACTACCAATT
1801 GTTAATTGGA AATCCAATCT TACGCCGCTA CCCGAAAATC CTGCACACAG TACTGAATAC
1861 CAGAGAGAGC CCCGACTCCT TAAAGCCCAA GACTTATCGC TCCGAAACCG TTAATAACGT
1921 TAGAACCTAC TCCGCTGGTA ATCGTGGTAA CCCAGAAAC ATAAACTGT CTTTTGCCCC
1981 CACCATCTC GAAGCAACTG ACCCGAAATC CGCTGGTAAT CGTGGTGACT CCAGAACCAA
2041 AACCTGTCT CTTGCAACCA CTACTCCTGC AGCAATTGAC CCGCTTACGA CCCTTGATAA
2101 CCCAGGTAGT ACTCAAAGTA CATTTGCGCA ATTCCCGATA CCTGAAGAAG CGAGCATCCT
2161 AGAAGAGGAT GGAAAATACT CCAACGTTGT CTCAACCATT CAGAGTGTAG AACCTAATGC
2221 TACTGATCAC AGCAATAAGG ACACTTTTG CACTTTGCCA GTTTGGTTAC AACAGAAGTA
2281 TAGAGAGATC ATACGTAATG ATCTCCACC AAGACCTGCC GACATTAATA ACATCCCGT
2341 AAAACATGAT ATTGAAATTA AACCTGGCGC AAGACTACCT CGACTACAGC CATAACATGT
2401 TACAGAAAAG AACGAACAAG AAATCAACAA AATAGTTCAA AAACCTGCTCG ATAACAAGTT
2461 CATTGTTCCC TCAAAGTCGC CTTGCAGCTC CCCTGTAGTC CTCGTCCCGA AGAAAGACGG
2521 TACCTTCCGA CTCTGCGTCG ATTACCGCAC CCTGAACAAA GCTACCATCT CCGACCCATT
2581 CCCATTACCC AGAATCGACA ACCTATTGAG CCGTATTGGA AATGCCCAGA TATTTACCAC
2641 GCTAGATTTG CATAGTGGTT ACCACCAGAT CCCGATGGAA CCCAAAGACC GCTACAAAAC
2701 CGCCTTTGTC ACACCATCCG GTAAGTATGA ATATACCGTC ATGCCATTTG GCTTAGTCAA

```

|      |            |            |             |            |             |            |
|------|------------|------------|-------------|------------|-------------|------------|
| 2761 | TGCACCTAGT | ACATTCGCAA | GATACATGGC  | TGATACATTT | AGAGACCTGA  | GATTCGTCAA |
| 2821 | TGTTTACCTT | GATGATATAT | TAATATTCTC  | CGAATCTCCA | GAAGAACATT  | GGAAACATTT |
| 2881 | AGACACGGTA | CTAGAAAGAT | TAAAGAACGA  | GAACCTCATT | GTTAAGAAGA  | AAAAATGTAA |
| 2941 | ATTTGCATCT | GAAGAAACTG | AGTTTTTtagG | CTATAGTATT | GGAATCCAGA  | AAATAGCTCC |
| 3001 | ACTACAGCAC | AAATGTGCAG | CAATCCGAGA  | CTTTCCGACG | CCTAAAACAG  | TAAAACAAGC |
| 3061 | ACAGAGATTT | TTAGGAATGA | TTAATTACTA  | CAGACGATTC | ATTCCAAATT  | GCTCCAAGAT |
| 3121 | TGCACAGCCA | ATCCAACTGT | TTATTTGTGA  | CAAAAGTCAA | TGGACAGAAA  | AACAAGACAA |
| 3181 | GGCAATTGAT | AAACTAAAAG | ACGCCTTGTG  | TAACTCCCC  | GTCCTAGTAC  | CATTCAACAA |
| 3241 | CAAAGCAAAC | TACCGACTTA | CAACAGACGC  | CTCAAAGAC  | GGCATTGGTG  | CTGTTCTAGA |
| 3301 | AGAAGTCGAC | AACAAGAACA | AACTTGTTGG  | TGTCGTCGGT | TACTTCTCTA  | AATCCTTAGA |
| 3361 | GAGTGCCAG  | AAAACTATC  | CTGCTGGCGA  | ATTAGAACTA | CTTGGAATTA  | TCAAAGCACT |
| 3421 | CCACCCTTC  | CGATATATGC | TTCACGGAAA  | GCATTTCACG | TTAAGAACAG  | ACCACATTAG |
| 3481 | TTTGTTATCA | TTACAAAACA | AGAACGAACC  | CGACGAACGC | GTGCAACGCT  | GGTTAGATGA |
| 3541 | CCTAGCCACA | TATGACTTCA | CCTTAGAATA  | CCTAGCTGGA | CCCAAGAACG  | TTGTGCGAGA |
| 3601 | TGCCATATCC | CGTGCCGTAT | ATACTATAAC  | CCCCGAAACA | TCCCAGACCTA | TCGACACAGA |
| 3661 | AAGCTGAAA  | TCTTACTACA | AATCAGACCC  | ATTATGTAGT | GCTGTCTTAA  | TTCATATGAA |
| 3721 | AGAATTGACA | CAACACAACG | TCACACCTGA  | AGATATGTCA | GCCTTCCGTA  | GTTACCAGAA |
| 3781 | GAAACTCGAA | CTATCAGAGA | CCTTCCGAAA  | GAATTATTCC | CTAGAAGACG  | AAATGATCTA |
| 3841 | TTACCAAGAC | CGACTAGTAG | TACCAATAAA  | ACAACAGAAC | GCAGTTATGA  | GACTATATCA |
| 3901 | TGACCATAAC | TTATTTGGAG | GACATTTTGG  | TGTAACAGTG | ACCCTTGCGA  | AAATCAGCCC |
| 3961 | AATTTACTAT | TGGCCAAAAT | TACAACATTC  | GATCATACAA | TACATCAGGA  | CCTGCGTACA |
| 4021 | ATGTCAACTA | ATAAAATCAC | ACCGACCACG  | CTTACATGGA | CTATTACAAC  | CACTCCCTAT |
| 4081 | AGCAGAAGGA | AGATGGCTTG | ATATATCAAT  | GGATTTTGTG | ACAGGATTAC  | CCCCGACATC |
| 4141 | AAATAACTTG | AATATGATCC | TCGTCGTAGT  | TGATCGTTTT | TCGAAACGCG  | CTCACTTCAT |
| 4201 | AGCTACAAGG | AAAACCTTAG | ACGCAACACA  | ACTAATAGAT | CTACTCTTTC  | GATACATTTT |
| 4261 | TTCATATCAT | GGTTTTCCCA | GGACAATAAC  | CAGTGATAGA | GATGTCCGTA  | TGACCGCCGA |
| 4321 | CAAATATCAA | GAACTCACGA | AAAGACTAGG  | AATAAAATCG | ACAATGTCTT  | CCGCGAACCA |
| 4381 | CCCCCAAACA | GATGGACAAT | CCGAACGAAC  | GATACAGACA | TTAAACAGGT  | TACTAAGAGC |
| 4441 | CTATGCTTCA | ACCAATATTC | AGAATTGGCA  | TGTATATTTA | CCACAAATCG  | AATTTGTTTA |
| 4501 | CAATTCTACA | CCTACTAGAA | CACTTGGAAA  | ATCACCATTT | GAAATTGATT  | TAGGATATTT |
| 4561 | ACCGAATACC | CCTGCTATTA | AGTCAGATGA  | CGAAGTCAAC | GCAAGAAGTT  | TTACTGCCGT |
| 4621 | AGAACTTGCC | AAACACCTCA | AAGCCCTTAC  | CATCCAAACG | AAGGAACAGC  | TAGAACACGC |
| 4681 | TCAAATCGAA | ATGGAAACTA | ATAACAATCA  | AAGACGTAAA | CCCTTATTGT  | TAAACATAGG |
| 4741 | AGATCACGTA | TTAGTGCATA | GAGATGCATA  | CTTCAAGAAA | GGTGCTTATA  | TGAAAGTACA |
| 4801 | ACAAATATAC | GTCGGACCAT | TTCGAGTTGT  | CAAGAAAATA | AACGATAACG  | CCTACGAACT |
| 4861 | AGATTTAAAC | TCTCACAAGA | AAAAGCACAG  | AGTTATTAAT | GTACAATTCC  | TGAAAAAGTT |
| 4921 | TGTATACCGT | CCAGACGCGT | ACCCAAAGAA  | TAAACCAATC | AGCTCCACTG  | AAAGAATTAA |
| 4981 | GAGAGCACAC | GAAGTACTG  | CACTCATAGG  | AATAGATACT | ACACACAAAA  | CTTACTTATG |
| 5041 | TCACATGCAA | GATGTAGACC | CAACACTTTC  | AGTAGAATAC | TCAGAAGCTG  | AATTTTGCCA |
| 5101 | AATTCCCGAA | AGAACACGAA | GATCAATATT  | AGCCAACTTT | AGACAACCTC  | ACGAAACACA |
| 5161 | AGACAACCCT | GAGAGAGAGG | AAGATGTTGT  | ATCTCAAAAT | GAGATATGTC  | AGTATGACAA |
| 5221 | TACGTCACCC | GGCTGAACAT | GAGGATCACC  | CATGTCTGCG | GTCGACTCTA  | GAAACATGAG |
| 5281 | GATCACCCAT | GTCCGGGACG | TTCATAAAAC  | ACATATGAAA | CAACCTTATA  | ACAAAACGAA |
| 5341 | CAACATGAGA | CAAACCCGA  | CCTTCCCTAG  | CTGAACTACC | CAAAGTATAA  | ATGCCTGAAC |
| 5401 | AATTAGTTTA | GATCCGAGAT | TCCGCGCTTC  | CACCACTTAG | TATGATTCAT  | ATTTTATATA |
| 5461 | ATATATAAGA | TAAGTAACAT | TCCGTGAATT  | AATCTGATAA | ACTGTTTTGA  | CAACTGGTTA |
| 5521 | CTTCCCTAAG | ACTGTTTATA | TTAGGATTGT  | CAAGACACTC | CGGTATTACT  | CGAGCCCGTA |
| 5581 | ATACAACAGG | ATCCACTAGT | AACGGCCGCC  | AGTGTGCTGG | AATTCTGCAG  | ATATCCATCA |
| 5641 | CACTGGCGGC | CGCTCGAGCA | TGCATCTAGA  | GGGCCGCATC | ATGTAATTAG  | TTATGTCACG |
| 5701 | CTTACATTCA | CGCCCTCCCC | CCACATCCGC  | TCTAACCGAA | AAGGAAGGAG  | TTAGACAACC |
| 5761 | TGAAGTCTAG | GTCCCTATTT | ATTTTTTTTAT | AGTTATGTTA | GTATTAAGAA  | CGTTATTTAT |
| 5821 | ATTTCAAATT | TTTCTTTTTT | TTCTGTACAG  | ACGCGTGTAC | GCATGTAACA  | TTATACTGAA |
| 5881 | AACCTTGCTT | GAGAAGGTTT | TGGGACGCTC  | GAAGGCTTTA | ATTTGCCGGC  | CCTGCATTAA |
| 5941 | TGAATCGGCC | AACGCGCGGG | GAGAGGCGGT  | TTGCGTATTG | GGCGCTCTTC  | CGCTTCCTCG |

6001 CTCACTGACT CGCTGCGCTC GGTCGTTTCGG CTGCGGCGAG CGGTATCAGC TCACTCAAAG  
6061 GCGGTAATAC GGTTATCCAC AGAATCAGGG GATAACGCAG GAAAGAACAT GTGAGCAAAA  
6121 GGCCAGCAAA AGCCCAGGAA CCGTAAAAAG GCCGCGTTGC TGGCGTTTTT CCATAGGCTC  
6181 CGCCCCCTG ACGAGCATCA CAAAAATCGA CGCTCAAGTC AGAGGTGGCG AAACCCGACA  
6241 GGACTATAAA GATACCAGGC GTTTCCCCCT GGAAGCTCCC TCGTGCCTC TCCTGTTCCG  
6301 ACCCTGCCGC TTACCGGATA CCTGTCCGCC TTTCTCCCTT CGGGAAGCGT GCGCCTTCT  
6361 CATAGCTCAC GCTGTAGGTA TCTCAGTTCG GTGTAGGTCG TTCGCTCCAA GCTGGGCTGT  
6421 GTGCACGAAC CCCCCGTTCA GCCCGACCGC TGCGCCTTAT CCGGTAACTA TCGTCTTGAG  
6481 TCCAACCCGG TAAGACACGA CTTATCGCCA CTGGCAGCAG CCACTGGTAA CAGGATTAGC  
6541 AGAGCGAGGT ATGTAGGCGG TGCTACAGAG TTCTTGAAGT GGTGGCCTAA CTACGGCTAC  
6601 ACTAGAAGGA CAGTATTTGG TATCTGCGCT CTGCTGAAGC CAGTTACCTT CGGAAAAAGA  
6661 GTTGGTAGCT CTTGATCCGG CAAACAAACC ACCGCTGGTA GCGGTGGTTT TTTTGTTCG  
6721 AAGCAGCAGA TTACGCGCAG AAAAAAGGA TCTCAAGAAG ATCCTTTGAT CTTTTCTACG  
6781 GGGTCTGACG CTCAGTGGA CGAAAACTCA CGTTAAGGGA TTTTGGTCAT GAGATTATCA  
6841 AAAAGGATCT TCACCTAGAT CCTTTTAAAT TAAAAATGAA GTTTTAAATC AATCTAAAGT  
6901 ATATATGAGT AACTTTGGTC TGACAGTTAC CAATGCTTAA TCAGTGAGGC ACCTATCTCA  
6961 GCGATCTGTC TATTTGTTTC ATCCATAGTT GCCTGACTCC CCGTCGTGTA GATAACTACG  
7021 ATACGGGAGC GCTTACCATC TGGCCCCAGT GCTGCAATGA TACCGCGAGA CCCACGCTCA  
7081 CCGGCTCCAG ATTTATCAGC AATAAACAG CCAGCCGGAA GGGCCGAGCG CAGAAGTGGT  
7141 CCTGCAACTT TATCCGCCTC CATTAGTCT ATTAATTGTT GCCGGGAAGC TAGAGTAAGT  
7201 AGTTCGCCAG TTAATAGTTT GCGCAACGTT GTTGGCATTG CTACAGGCAT CGTGGTGTCA  
7261 CTCTCGTCGT TTGGTATGGC TTCATTACAG TCCGGTCCC AACGATCAAG GCGAGTTACA  
7321 TGATCCCCCA TGTTGTGCAA AAAAGCGGTT AGCTCCTTCG GTCCTCCGAT CGTTGTCAGA  
7381 AGTAAGTTGG CCGCAGTGT ATCACTCATG GTTATGGCAG CACTGCATAA TTCTCTTACT  
7441 GTCATGCCAT CCGTAAGATG CTTTTCTGTG ACTGGTGAGT ACTCAACCAA GTCATTCTGA  
7501 GAATAGTGTA TGCGGCGACC GAGTTGCTCT TGCCCAGCGT CAATACGGGA TAATAGTGTA  
7561 TCACATAGCA GAACTTTAAA AGTGCTCATC ATTGGAAAAC GTTCTTCGGG GCGAAAACTC  
7621 TCAAGGATCT TACCGCTGTT GAGATCCAGT TCGATGTAAC CCACTCGTGC ACCCAACTGA  
7681 TCTTCAGCAT CTTTTACTTT CACCAGCGTT TCTGGGTGAG CAAAAACAGG AAGGCAAAT  
7741 GCCGCAAAA AGGGAATAAG GCGACACGG AAATGTTGAA TACTCATACT CTTCTTTTTT  
7801 CAATGGGTAA TAACTGATAT AATTAAATTG AAGCTCTAAT TTGTGAGTTT AGTATACATG  
7861 CATTACTTA TAATACAGTT TTTTAGTTTT GCTGGCCGCA TCTTCTCAA TATGCTTCCC  
7921 AGCCTGCTTT TCTGTAACGT TCACCCTCTA CCTTAGCATC CCTTCCCTTT GCAAATAGTC  
7981 CTCTTCCAAC AATAATAATG TCAGATCCTG TAGAGACCAC ATCATCCACG GTTCTATACT  
8041 GTTGACCAA TGCGTCTCCC TTGTCATCTA AACCACACC GGTGTGATA ATCAACCAAT  
8101 CGTAACCTT ATCTCTTCCA CCCATGTCTC TTTGAGCAAT AAAGCCGATA ACAAATCTT  
8161 TGTCGCTCTT CGCAATGTCA ACAGTACCCT TAGTATATTC TCCAGTAGAT AGGGAGCCCT  
8221 TGCATGACAA TTCTGCTAAC ATCAAAGGC CTCTAGGTTT CTTTGTACT TCTTCTGCCG  
8281 CCTGCTTCAA ACCGCTAACA ATACCTGGGC CCACCACACC GTGTGCATTC GTAATGTCTG  
8341 CCCATTCTGC TATTCTGTAT ACACCCGAG AGTACTGCAA TTTGACTGTA TTACCAATGT  
8401 CAGCAAATTT TCTGTCTTCG AAGAGTAAAA AATTGTACTT GCGGATAAT GCCTTTAGCG  
8461 GCTTAACTGT GCCCTCCATG GAAAAATCAG TCAAGATATC CACATGTGTT TTTAGTAAAC  
8521 AAATTTTGGG ACCTAATGCT TCAACTAACT CCAGTAATTC CTTGGTGGTA CGAACATCCA  
8581 ATGAAGACA CAAGTTTGTG TGCTTTTTCGT GCATGATATT AAATAGCTTG GCAGCAACAG  
8641 GACTAGGATG AGTAGCAGCA CGTTCCTTAT ATGTAGCTTT CGACATGATT TATCTTCGTT  
8701 TCCTGCAGGT TTTTGTCTG TGCAGTTGGG TTAAGAATAC TGGGCAATTT CATGTTTCTT  
8761 CAACACTACA TATGCGTATA TATACCAATC TAAGTCTGTG CTCCTTCCTT CGTTCTTCCT  
8821 TCTGTTCCGA GATTACCGAA TCAAAAAAAT TTCAAAGAAA CCGAAATCAA AAAAAAGAAT  
8881 AAAAAAAAAA TGATGAATTG AATTGAAAAG CTAGCTTATC GATGATAAGC TGTCAAAGAT  
8941 GAGAATTAAT TCCACGGACT ATAGACTATA CTAGATACTC CGTCTACTGT ACGATACT  
9001 TCCGCTCAGG TCCTTGTCTT TTAACGAGGC CTTACCCTC TTTTGTACT CTATTGATCC  
9061 AGCTCAGCAA AGGCAGTGTG ATCTAAGATT CTATCTTCGC GATGTAGTAA AACTAGCTAG  
9121 ACCGAGAAAG AACTAGAAA TGCAAAGGC ACTTCTACAA TGGCTGCCAT CATTATATC  
9181 CGATGTGACG CTGCAGCTTC TCAATGATAT TCGAATACGC TTTGAGGAGA TACAGCCTAA

9241 TATCCGACAA ACTGTTTTAC AGATTTACGA TCGTACTTGT TACCCATCAT TGAATTTTGA  
9301 ACATCCGAAC CTGGGAGTTT TCCCTGAAAC AGATAGTATA TTTGAACCTG TATAATAATA  
9361 TATAGTCTAG CGCTTTACGG AAGACAATGT ATGTATTTTCG GTTCCTGGAG AAAC TATTGC  
9421 ATCTATTGCA TAGGTAATCT TGCACGTCGC ATCCCCGGTT CATTTTCTGC GTTTCCATCT  
9481 TGCACTTCAA TAGCATATCT TTGTTAACGA AGCATCTGTG CTTCATTTTG TAGAACAAAA  
9541 ATGCAACGCG AGAGCGCTAA TTTTTCAAAC AAAGAATCTG AGCTGCATTT TTACAGAACA  
9601 GAAATGCAAC GCGAAAGCGC TATTTTACCA ACGAAGAATC TGTGCTTCAT TTTTGTAATA  
9661 CAAAAATGCA ACGCGACGAG AGCGCTAATT TTTCAAACAA AGAATCTGAG CTGCATTTTT  
9721 ACAGAACAGA AATGCAACGC GAGAGCGCTA TTTTACCAAC AAAGAATCTA TACTTCTTTT  
9781 TTGTTCTACA AAAATGCATC CCGAGAGCGC TATTTTTCTA ACAAAGCATC TTAGATTACT  
9841 TTTTTTCTCC TTTGTGCGCT CTATAATGCA GTCTCTTGAT AACTTTTTGC ACTGTAGGTC  
9901 CGTTAAGGTT AGAAGAAGGC TACTTTGGTG TCTATTTTCT CTCCATAAA AAAAGCCTGA  
9961 CTCCACTTCC CGCGTTTACT GATTACTAGC GAAGCTGCGG GTGCATTTTT TCAAGATAAA  
10021 GGCATCCCCG ATTATATTCT ATACCGATGT GGATTGCGCA TACTTTGTGA ACAGAAAGTG  
10081 ATAGCGTTGA TGATTCTTCA TTGGTCAGAA AATTATGAAC GTTTTCTTCT ATTTTGTCTC  
10141 TATATACTAC GTATAGGAAA TGTTTACATT TTCGTATTGT TTTTCGATTCA CTCTATGAAT  
10201 AGTTCTTACT ACAATTTTTT TGTCTAAAGA GTAATACTAG AGATAAACAT AAAAAATGTA  
10261 GAGGTCGAGT TTAGATGCAA GTTCAAGGAG CGAAAGGTGG ATGGGTAGGT TATATAGGGA  
10321 TATAGCACAG AGATATATAG CAAAGAGATA CTTTTGAGCA ATGTTTGTGG AAGCGGTATT  
10381 CGCAATGGGA AGCTCCACCC CGGTTGATAA TCAGAAAAGC CCCAAAAACA GGAAGATTGT  
10441 ATAAGCAAAT ATTTAAATTG TAAACGTTAA TATTTTGTTA AAATTCGCGT TAAATTTTTG  
10501 TTAAATCAGC TCATTTTTTA ACGAATAGCC CGAAATCGGC AAAATCCCTT ATAAATCAAA  
10561 AGAATAGACC GAGATAGGGT TGAGTGTTGT TCCAGTTTCC AACAAGAGTC CACTATTA  
10621 GAACGTGGAC TCCAACGTCA AAGGGCGAAA AAGGGTCTAT CAGGGCGATG GCCCACTACG  
10681 TGAACCATCA CCCTAATCAA GTTTTTTGGG GTCGAGGTGC CGTAAAGCAG TAAATCGGAA  
10741 GGGTAAACGG ATGCCCCAT TTAGAGCTTG ACGGGGAAAG CCGGCGAACG TGGCGAGAAA  
10801 GGAAGGGAAG AAAGCGAAAG GAGCGGGGGC TAGGGCGGTG GGAAGTGTAG GGGTCACGCT  
10861 GGGCGTAACC ACCACACCCG CCGCGCTTAA TGGGGCGCTA CAGGGCGCGT GGGGATGATC  
10921 CACTAGT

//

|              |                     |                                                                                                                                                                                                                                            |     |        |             |
|--------------|---------------------|--------------------------------------------------------------------------------------------------------------------------------------------------------------------------------------------------------------------------------------------|-----|--------|-------------|
| LOCUS        | pKC3702             | 10891 bp                                                                                                                                                                                                                                   | DNA | linear | 15-JUN-2012 |
| FEATURES     | Location/Qualifiers |                                                                                                                                                                                                                                            |     |        |             |
| misc_feature | 1..393              | /note="Gal Promoter"                                                                                                                                                                                                                       |     |        |             |
| misc_feature | 396..406            | /note="start of transcription "                                                                                                                                                                                                            |     |        |             |
| misc_feature | 396..446            | /note="R"                                                                                                                                                                                                                                  |     |        |             |
| misc_feature | 447..513            | /note="U5"                                                                                                                                                                                                                                 |     |        |             |
| misc_feature | 581..1201           | /note="Capsid"                                                                                                                                                                                                                             |     |        |             |
| CDS          | 581..1201           | /note=""                                                                                                                                                                                                                                   |     |        |             |
|              |                     | /translation="MSFMDQIPGGGNYPKLPVECLPNFPIQPSLTFRGRNDSHKLNKFI<br>ISEIMLNMSMISWPNDASRIVYCRRHLLNPAAQWANDFVQEQGILEITFDTFIQGLYQ<br>HFYKPPDINKIFNAITQLSEAKLGIERLNQRFRKIWDMPDFMTEKAAIMTYTRLLT<br>KETYNIVRMHKPETLKDAMEEAYQTTALTERFFPGFELDADGDITIIG" |     |        |             |
| misc_feature | 1202..1279          | /note=""                                                                                                                                                                                                                                   |     |        |             |
| CDS          | 1202..1279          | /note=""                                                                                                                                                                                                                                   |     |        |             |
|              |                     | /translation="ATTHLQEEYDSYDSEDNLTQNGYVH"                                                                                                                                                                                                   |     |        |             |
| misc_feature | 1280..1453          | /note="Nucleocapsid"                                                                                                                                                                                                                       |     |        |             |
| CDS          | 1280..1453          | /note=""                                                                                                                                                                                                                                   |     |        |             |
|              |                     | /translation="TVRTRRSYNKPMNSHRNRNRRNNNPSREECIKNRLCFYCKKEGHRL<br>NECRARKASSNRS"                                                                                                                                                             |     |        |             |
| misc_feature | 1454..5222          | /note="POL3"                                                                                                                                                                                                                               |     |        |             |
| misc_feature | 5177..5222          | /note="U3"                                                                                                                                                                                                                                 |     |        |             |
| misc_feature | 5229..5284          | /note="MS2"                                                                                                                                                                                                                                |     |        |             |
| misc_feature | 5642..5889          | /note="CYC terminator"                                                                                                                                                                                                                     |     |        |             |
| misc_feature | 5290..5434          | /note="U3"                                                                                                                                                                                                                                 |     |        |             |
| misc_feature | 5435..5485          | /note="R"                                                                                                                                                                                                                                  |     |        |             |
| misc_feature | 5443..5446          | /note="mapped end of transcript 1"                                                                                                                                                                                                         |     |        |             |
| misc_feature | 5464..5466          | /note="mapped end of transcript 2"                                                                                                                                                                                                         |     |        |             |
| misc_feature | 5476..5478          | /note="mapped end of transcript 3"                                                                                                                                                                                                         |     |        |             |
| misc_feature | 5483..5485          | /note="mapped end of transcript 4"                                                                                                                                                                                                         |     |        |             |
| misc_feature | 5486..5552          | /note="U5"                                                                                                                                                                                                                                 |     |        |             |
| misc_feature | 5809..5815          | /note="transcription end"                                                                                                                                                                                                                  |     |        |             |
| source       | 1..10891            | /dnas_title="pKC3702"                                                                                                                                                                                                                      |     |        |             |

ORIGIN

```

1  ACGGATTAGA AGCCGCCGAG CGGGTGACAG CCCTCCGAAG GAAGACTCTC CTCCGTGCGT
61 CCTCGTCTTC ACCGGTCGCG TTCCTGAAAC GCAGATGTGC CTCGCGCCGC ACTGCTCCGA
121 ACAATAAAGA TTCTACAATA CTAGCTTTTA TGGTTATGAA GAGGAAAAAT TGGCAGTAAC
181 CTGGCCCCAC AAACCTTCAA ATGAACGAAT CAAATTAACA ACCATAGGAT GATAATGCGA
241 TTAGTTTTTT AGCCTTATTT CTGGGGTAAT TAATCAGCGA AGCGATGATT TTTGATCTAT
301 TAACAGATAT ATAAATGCAA AAACCTGCATA ACCACTTTAA CTAATACTTT CAACATTTTC
361 GGTTCGTATT ACTTCTTATT CAAATGTAAT AAAGATAAGT AACATTCCGT GAATTAATCT
421 GATAAACTGT TTTGACAAC TTTACTTCC CTAAGACTGT TTATATTAGG ATTGTCAAGA
481 CACTCCGGTA TTA CTGAGC CCGTAATACA ACACCTTAAA GGTTACTAAT TGTTCAAACG
541 AACCATCGAA AAGCCGAACC TAGCTACACC ACACCCAGT ATGAGCTTTA TGGATCAAAT
601 CCCAGGAGGA GGAAATATC CAAAACCTCC AGTAGAATGC CTCCTAACT TCCCGATCCA
661 ACCATCTTTG ACCTTCAGAG GTAGAAATGA CTCGCATAAA CTGAAAAACT TTATCTCCGA
721 AATAATGTTA AACATGTCTA TGATATCTTG GCCGAATGAT GCCAGTCGTA TTGTGTACTG
781 CAGAAGACAT TTATTAAACC CCGCTGCTCA GTGGGCTAAT GACTTTGTAC AAGAACAAGG
841 TACTACTGAA ATAACATTCG ACACATTCAT ACAAGGATTA TATCAGCATT TCTATAAGCC
901 ACCAGATATC AATAAAATCT TTAATGCAAT CACGCAACTT TCCGAAGCTA AACTTGGTAT
961 TGAGCGTCTC AACCAACGAT TCAGAAAGAT TTGGGACAGA ATGCCACCAG ACTTCATGAC
1021 CGAAAAAGCT GCCATAATGA CATATACTAG GCTATTGACA AAGGAAACCT ATAATATTGT
1081 CAGAATGCAC AAACAGAGA CATTAAAAGA GCCCATGGAA GAGGCTTACC AACAACCTGC
1141 ACTAACTGAA AGATTCTTCC CAGGATTCGA ACTTGATGCT GATGGAGACA CTATCATCGG
1201 TGCCACAACC CACTTACAAG AAGAATACGA CTCTGACTAT GATTCAGAAG ATAATCTGAC
1261 CCAGAATGGA TACGTCCATA CCGTAAGGAC AAGAAGATCT TACAATAAAC CAATGTCAAA
1321 TCATCGAAAC AGGAGAAATA ACAACCCATC TAGAGAAGAA TGTATAAAAA ATCGGCTATG
1381 CTTCTATTGT AAGAAAAGAGG GACATCGCCT GAACGAATGT AGAGCACGTA AGGCGAGTTC
1441 TAACCGATCT TGAACCTCGAA TCAAAAAGACC AACAAACTCC TTTTATCAAA ACCTTACCAA
1501 TTGTACTACTA TATCGCCATC CCCGAGATGG ACAATAACCGC CGAAAAAAC ATAAAAATAC
1561 AAAACACGAA AGTAAAAACC CTGTTTGACA GTGGATCACC CACGTCATTT ATCCGAAGAG
1621 ATATTGTAGA ACTTCTCAA TACGAAATCT ACGAGACCCC TCCACTCCGT TTTAGAGGAT
1681 TCGTAGCCAC CAAATCCGCC GTTACATCCG AAGCAGTCAC CATTGACCTC AAAATCAATG
1741 ACCTGCATAT AACTTTAGCC GCGTACATAC TGGATAACAT GGACTACCAA TTGTTAATTG
1801 GAAATCCAAT CTTACGCCGC TACCCGAAAA TCCTGCACAC AGTACTGAAT ACCAGAGAGA
1861 GCCCGACTC CTTAAAGCCC AAGACTTATC GCTCCGAAAC CGTTAATAAC GTTAGAACCT
1921 ACTCCGCTGG TAATCGTGGT AACCCAGAA ACATAAAACT GTCTTTTGCC CCCACCATTG
1981 TCGAAGCAAC TGACCCGAAA TCCGCTGGTA ATCGTGGTGA CTCCAGAACC AAAACCTGT
2041 CTCTTGCAAC CACTACTCCT GCAGCAATTG ACCCGCTTAC GACCCTTGAT AACCCAGGTA
2101 GACTCAAAG TACATTTGCG CAATTCCTCGA TACCTGAAGA AGCGAGCATC CTAGAAGAGG
2161 ATGGAAAATA CTCCAACGTT GTCTCAACCA TTCAGAGTGT AGAACCTAAT GCTACTGATC
2221 ACAGCAATAA GGACACCTTT TGCATTTGTC CAGTTTGGTT ACAACAGAAG TATAGAGAGA
2281 TCATACGTAA TGATCTCCCA CCAAGACCTG CCGACATTAA TAACATCCCC GTAAAACATG
2341 ATATTGAAAT TAAACCTGGC GCAAGACTAC CTCGACTACA GCCATACCAT GTTACAGAAA
2401 AGAACGAACA AGAAATCAAC AAAATAGTTC AAAAATGCT CGATAACAAG TTCATTGTTT
2461 CCTCAAAGTC GCCTTGACGC TCCCCTGTAG TCCTCGTCCC GAAGAAAGAC GGTACCTTCC
2521 GACTCTGCGT CGATTACCGC ACCCTGAACA AAGCTACCAT CTCCGACCCA TTCCATTAC
2581 CCAGAATCGA CAACCTATTG AGCCGTATTG GAAATGCCCA GATATTTACC ACGCTAGATT
2641 TGCATAGTGG TTACCACCAG ATCCCGATGG AACCCAAAGA CCGCTACAAA ACCGCCTTTG
2701 TCACACCATC CGGTAAGTAT GAATATACCG TCATGCCATT TGGCTTAGTC AATGCACCTA
2761 GTACATCTGC AAGATACATG GCTGATACAT TTAGAGACCT GAGATTGCTC AATGTTTACC
2821 TTGATGATAT ATTAATATTG TCCGAATCTC CAGAAGAACA TTGGAAACAT TTAGACACCG
2881 TACTAGAAAG ATTAAGAAC GAGAACCTCA TTGTTAAGAA GAAAAATGT AAATTTGCAT
2941 CTGAAGAAAC TGAGTTTTTA GGCTATAGTA TTGGAATCCA GAAAATAGCT CCACTACAGC
3001 ACAAATGTGC AGCAATCCGA GACTTTCCGA CGCTAAAAC AGTAAAACAA GCACAGAGAT
3061 TTTTAGGAAT GATTAATTAC TACAGACGAT TCATTCCAAA TTGCTCCAAG ATTGCACAGC
3121 CAATCCAAC GTTTATTTGT GACAAAAGTC AATGGACAGA AAAACAAGAC AAGGCAATTG
3181 ATAACTAAA AGACGCCCTG TGTAACCTCC CCGTCCTAGT ACCATTCAAC AACAAAGCAA

```

3241 ACTACCGACT TACAACAGAC GCCTCAAAAG ACGGCATTGG TGCTGTTCTA GAAGAAGTCG  
3301 ACAACAAGAA CAAACTTGTT GGTGTCGTCG GTTACTTCTC TAAATCCTTA GAGAGTGCCC  
3361 AGAAAACTA TCCTGCTGGC GAATTAGAAC TACTTGGAAT TATCAAAGCA CTCCACCACT  
3421 TCCGATATAT GCTTCACGGA AAGCATTTC ACGTTAAGAAC AGACCACATT AGTTTGTAT  
3481 CATTACAAA CAAGAACGAA CCCGACGAAC GCGTGCAACG CTGGTTAGAT GACCTAGCCA  
3541 CATATGACTT CACCTTAGAA TACCTAGCTG GACCCAAGAA CGTTGTCGCA GATGCCATAT  
3601 CCCGTGCCGT ATATACTATA ACCCCCGAAA CATCCCGACC TATCGACACA GAAAGCTGGA  
3661 AATCTTACTA CAAATCAGAC CCATTATGTA GTGCTGTCTT AATTCATATG AAAGAATTGA  
3721 CACAACACAA CGTCACACCT GAAGATATGT CAGCCTTCCG TAGTTACCAG AAGAACTCG  
3781 AACTATCAGA GACCTTCCGA AAGAATTATT CCCTAGAAGA CGAAATGATC TATTACCAAG  
3841 ACCGACTAGT AGTACCAATA AAACAACAGA ACGCAGTTAT GAGACTATAT CATGACCATA  
3901 CCTTATTTGG AGGACATTTT GGTGTAACAG TGACCCCTGC GAAAATCAGC CCAATTTACT  
3961 ATTGGCCAAA ATTACAACAT TCGATCATA AATACATCAG GACCTGCGTA CAATGTCAAC  
4021 TAATAAAATC ACACCGACCA CGCTTACATG GACTATTACA ACCACTCCCT ATAGCAGAAG  
4081 GAAGATGGCT TGATATATCA ATGGATTTTG TGACAGGATT ACCCCCGACA TCAAATAACT  
4141 TGAATATGAT CCTCGTCGTA GTTGATCGTT TTTGAAACG CGCTCACTTC ATAGCTACAA  
4201 GGAAAACCTT AGACGCAACA CAACTAATAG ATCTACTCTT TCGATACATT TTTTCATATC  
4261 ATGGTTTTCC CAGGACAATA ACCAGTATA GAGATGTCCG TATGACCCGC GACAAATATC  
4321 AAGAATCTAC GAAAAGACTA GGAATAAATA CGACAATGTC TTCCGCGAAC CCCCCAAA  
4381 CAGATGGACA ATCCGAACGA ACGATACAGA CATTAAACAG GTTACTAAGA CACTTGCCTT  
4441 CAACCAATAT TCAGAATTGG CATGTATATT TACCACAAAT CGAATTTGTT TACAATTCTA  
4501 CACCTACTAG AACACTTGGA AAATCACCAT TTGAAATGTA TTTAGGATAT TTACCGAATA  
4561 CCCCTGCTAT TAAGTCAGAT GACGAAGTCA ACGCAAGAAG TTTTACTGCC GTAGAACTTG  
4621 CCAAACACCT CAAAGCCCTT ACCATCCAAA CGAAGGAACA GCTAGAACAC GCTCAAATCG  
4681 AAATGGAAAC TAATAACAAT CAAAGACGTA AACCTTATT GTTAAACATA GGAGATCAGC  
4741 TATTAGTGCA TAGAGATGCA TACTTCAAGA AAGGTGCTTA TATGAAAGTA CAACAAATAT  
4801 ACGTCGGACC ATTTTCGAGT GTCAAGAAAA TAAACGATAA CGCCTACGAA CTAGATTTAA  
4861 ACTCTCACAA GAAAAAGCAC AGAGTTATTA ATGTACAATT CCTGAAAAAG TTTGTATACC  
4921 GTCCAGACGC GTACCCAAAG AATAAACCAA TCAGCTCCAC TGAAAGAATT AAGAGAGCAC  
4981 ACGAAGTTAC TGCATCATA GGAATAGATA CTACACACAA AACTTACTTA TGTACATGC  
5041 AAGATGTAGA CCCAACACTT TCAGTAGAAT ACTCAGAAGC TGAATTTTGC CAAATCCCCG  
5101 AAAGAACACG AAGATCAATA TTAGCCAAC TTAGACAAC CTACGAAACA CAAGACAACC  
5161 CTGAGAGAGA GGAAGATGTT GTATCTCAA ATGAGATATG TCAGTATGAC AATACGTCAC  
5221 CCGGCTGAAC ATGAGGATCA CCCATGTCTG CGGTCGACTC TAGAAACATG AGGATCACCC  
5281 ATGTCCGGGA CGTTCATAAA ACACATATGA AACAACCTTA TAACAAAACG AACACATGA  
5341 GACAAAACCC GACCTTCCCT AGCTGAACTA CCCAAAGTAT AAATGCCTGA ACAATTACAC  
5401 TTAGTATGAT TCATATTTTA TATAATATAT AAGATAAGTA ACATTCCGTG AATTAATCTG  
5461 ATAACTGTT TTGACAACCTG GTTACTTCCC TAAGACTGTT TATATTAGGA TTGTCAAGAC  
5521 ACTCCGGTAT TACTCGAGCC CGTAATACAA CAGGATCCAC TAGTAACGGC CGCCAGTGTG  
5581 CTGGAATTCT GCAGATATCC ATCACACTGG CCGCCGCTCG AGCATGCATC TAGAGGGCCG  
5641 CATCATGTAA TTAGTTATGT CACGCTTACA TTCACGCCCT CCCCCACAT CCGCTCTAAC  
5701 CGAAAAGGAA GGAGTTAGAC AACCTGAAGT CTAGGTCCCT ATTTATTTTT TTATAGTTAT  
5761 GTTAGTATTA AGAACGTTAT TTATATTTCA AATTTTCTT TTTTTTCTGT ACAGACGCGT  
5821 GTACGCATGT AACATTATAC TGAAAACCTT GCTTGAGAAG GTTTTGGGAC GCTCGAAGGC  
5881 TTTAATTTGC CGGCCCTGCA TTAATGAATC GGCCAACGCG CGGGGAGAGG CGGTTTGGCT  
5941 ATTGGGCGCT CTTCCGCTTC CTCGCTCACT GACTCGCTGC GCTCGGTCTG TCGGCTGCGG  
6001 CGAGCGGTAT CAGCTCACTC AAAGGCGGTA ATACGGTTAT CCACAGAATC AGGGGATAAC  
6061 GCAGGAAAGA ACATGTGAGC AAAAGGCCAG CAAAGCCCA GGAACCGTAA AAAGCCGCGC  
6121 TTGCTGGCGT TTTTCCATAG GCTCCGCCCC CCTGACGAGC ATCACAASAAA TCGAGCCTCA  
6181 AGTCAGAGGT GGCGAAACCC GACAGGACTA TAAAGATACC AGGCGTTTCC CCTTGAAGC  
6241 TCCCTCGTGC GCTCTCCTGT TCCGACCCTG CCGCTTACCG GATACCTGTC CGCCTTCTC  
6301 CCTTCGGGAA GCGTGGCGCT TTCTCATAGC TCACGCTGTA GGTATCTCAG TTCGGTGTAG  
6361 GTCGTTGCT CCAAGCTGGG CTGTGTGCAC GAACCCCCCG TTCAGCCCGA CCGCTGCGCC  
6421 TTATCCGGTA ACTATCGTCT TGAGTCCAAC CCGGTAAGAC ACGACTTATC GCCACTGGCA  
6481 GCAGCCACTG GTAACAGGAT TAGCAGAGCG AGGTATGTAG GCGGTGCTAC AGAGTTCTTG

6541 AAGTGGTGGC CTAAC TACGG CTACACTAGA AGGACAGTAT TTGGTATCTG CGCTCTGCTG  
6601 AAGCCAGTTA CCTTCGGAAA AAGAGTTGGT AGCTCTTGAT CCGGCAAACA AACCACCGCT  
6661 GGTAGCGGTG GTTTTTTTGT TTGCAAGCAG CAGATTACGC GCAGAAAAAA AGGATCTCAA  
6721 GAAGATCCTT TGATCTTTTC TACGGGGTCT GACGCTCAGT GGAACGAAAA CTCACGTTAA  
6781 GGGATTTTGG TCATGAGATT ATCAAAAAGG ATCTTCACCT AGATCCTTTT AAATTA AAAA  
6841 TGAAGTTTTA AATCAATCTA AAGTATATAT GAGTAAACTT GGTCTGACAG TTACCAATGC  
6901 TTAATCAGTG AGGCACCTAT CTCAGCGATC TGTCTATTTT GTTCATCCAT AGTTGCCTGA  
6961 CTCCCCGTCG TGTAGATAAC TACGATACGG GAGCGCTTAC CATCTGGCCC CAGTGCTGCA  
7021 ATGATACCGC GAGACCCACG CTCACCGGCT CCAGATTTAT CAGCAATAAA CCAGCCAGCC  
7081 GGAAGGGCCG AGCGCAGAAAG TGGTCCTGCA ACTTTATCCG CCTCCATTCA GTCTATTAAT  
7141 TGTGTCGGGG AAGCTAGAGT AAGTAGTTTCG CCAGTTAATA GTTTGCGCAA CGTTGTTGGC  
7201 ATTGCTACAG GCATCGTGGT GTCACTCTCG TCGTTTGGTA TGGCTTCATT CAGCTCCGGT  
7261 TCCCAACGAT CAAGGCGAGT TACATGATCC CCCATGTTGT GCAAAAAAGC GGTAGCTCC  
7321 TTCGGTCCTC CGATCGTTGT CAGAAGTAAG TTGGCCGCAG TGTATCACT CATGGTTATG  
7381 GCAGCACTGC ATAATTCTCT TACTGTCTATG CCATCCGTAA GATGCTTTTC TGTGACTGGT  
7441 GAGTACTCAA CCAAGTCATT CTGAGAATAG TGTATGCGGC GACCGAGTTG CTCTTGCCCC  
7501 GCGTCAATAG GGGATAATAG TGTATCACAT AGCAGAACTT TAAAAGTGCT CATCATTTGA  
7561 AAACGTTCTT CGGGGCGAAA ACTCTCAAGG ATCTTACCCT GTTTGAGACT CAGTTCGATG  
7621 TAACCCACTC GTGCACCCAA CTGATCTTCA GCATCTTTTA CTTTACCAG CTTTCTGGG  
7681 TGAGCAAAAA CAGGAAGGCA AAATGCCGCA AAAAAGGGAA TAAGGGCGAC ACGGAAATGT  
7741 TGAATACTCA TACTCTTCCT TTTTCAATGG GTAATAACTG ATATAATTAA ATTGAAGCTC  
7801 TAATTTGTGA GTTTAGTATA CATGCATTTA CTTATAATAC AGTTTTTTAG TTTTGCTGGC  
7861 CGCATCTTCT CAAATATGCT TCCCAGCCTG CTTTTCTGTA ACGTTCACCC TCTACCTTAG  
7921 CATCCCTTCC CTTTGCAAAAT AGTCCTCTTC CAACAATAAT AATGTCAGAT CCTGTAGAGA  
7981 CCACATCATC CACGGTTCTA TACTGTTGAC CCAATGCGTC TCCCTTGTCA TCTAAACCCA  
8041 CACCGGGTGT CATAATCAAC CAATCGTAAC CTTTCTCTCT TCCACCCATG TCTCTTTGAG  
8101 CAATAAAGCC GATAACAAAA TCTTTGTGCG TCTTCGCAAT GTCAACAGTA CCCTTAGTAT  
8161 ATTCTCCAGT AGATAGGGAG CCCTTGCATG ACAATTCTGC TAACATCAAA AGGCCCTAG  
8221 GTTCCTTTGT TACTTCTTCT GCCGCCTGCT TCAAACCGCT AACAACTCT GGGCCACCA  
8281 CACCGTGTGC ATTCGTAATG TCTGCCCAT TCTGCTATCT GTATACACCC GCAGAGTACT  
8341 GCAATTTGAC TGTATTACCA ATGTCAGCAA ATTTTCTGTC TTCGAAGAGT AAAAAATTGT  
8401 ACTTGGCGGA TAATGCCTTT AGCGGCTTAA CTGTGCCCTC CATGGAAAAA TCAGTCAAGA  
8461 TATCCACATG TGTTTTTAGT AAACAAATTT TGGGACCTAA TGCTTCAACT AACTCCAGTA  
8521 ATTCTTTGGT GGTACGAACA TCCAATGAAG CACACAAGTT TGTTTTGCTTT TCGTGCATGA  
8581 TATTAATAG CTTGGCAGCA ACAGGACTAG GATGAGTAGC AGCACGTTCC TTATATGTAG  
8641 CTTTCGACAT GATTTATCTT CGTTTCCTGC AGGTTTTTGT TCTGTGCAGT TGGGTTAAGA  
8701 ATACTGGGCA ATTTTATGTT TCTTCAACAC TACATATGCG TATATATACC AATCTAAGTC  
8761 TGTGCTCCTT CCTTCGTTCT TCCTTCTGTT CGGAGATTAC CGAATCAAAA AAATTTCAAA  
8821 GAAACCGAAA TCAAAAAAAA GAATAAAAAA AAAATGATGA ATTGAATTGA AAAGCTAGCT  
8881 TATCGATGAT AAGCTGTCAA AGATGAGAAT TAATTCACG GACTATAGAC TATACTAGAT  
8941 ACTCCGTCTA CTGTACGATA CACTTCCGCT CAGGTCCCTG TCCTTTAACG AGGCCTTACC  
9001 ACTCTTTTGT TACTCTATTTG ATCCAGCTCA GCAAAGGCAG TGTGATCTAA GATTCATCT  
9061 TCGCGATGTA GTAAAACTAG CTAGACCGAG AAAGAGACTA GAAATGCAAA AGGCACCTCT  
9121 ACAATGGCTG CCATCATTTAT TATCCGATGT GACGCTGCAG CTTCTCAATG ATATTCGAAT  
9181 ACGCTTTGAG GAGATACAGC CTAATATCCG ACAAACGTT TTACAGATTT ACGATCGTAC  
9241 TTGTTACCCA TCATTGAATT TTGAACATCC GAACCTGGGA GTTTTCCCTG AAACAGATAG  
9301 TATATTTGAA CCTGTATAAT AATATATAGT CTAGCGCTTT ACGGAAGACA ATGTATGTAT  
9361 TTCGGTTCTT GGAGAACTA TTGCATCTAT TGCATAGGTA ATCTTGCACG TCGCATCCCC  
9421 GGTTTCAATTT CTGCGTTTCC ATCTTGCAT TCAATAGCAT ATCTTTGTTA ACGAAGCATC  
9481 TGTGCTTCAT TTTGTAGAAC AAAAATGCAA CGCGAGAGCG CTAATTTTTT AAACAAAGAA  
9541 TCTGAGCTGC ATTTTTTACAG AACAGAAATG CAACCGGAAA GCGCTATTTT ACCAACGAAG  
9601 AATCTGTGCT TCATTTTTTGT AAAACAAAAA TGCAACGCGA CGAGAGCGCT AATTTTTTCAA  
9661 ACAAAGAATC TGAGCTGCAT TTTTACAGAA CAGAAAATGCA ACGCGAGAGC GCTATTTTTAC  
9721 CAACAAAGAA TCTATACTTC TTTTTTGTTC TACAAAAATG CATCCCGAGA GCGCTATTTT  
9781 TCTAACAAAG CATCTTAGAT TACTTTTTTT CTCTTTTGTG CGCTCTATAA TGCAGTCTCT



9841 TGATAACTTT TTGCACTGTA GGTCCGTTAA GGTAGAAGA AGGCTACTTT GGTGTCTATT  
9901 TTCTCTTCCA TAAAAAAGC CTGACTCCAC TTCCCGCGTT TACTGATTAC TAGCGAAGCT  
9961 GCGGGTGCAT TTTTTC AAGA TAAAGGCATC CCCGATTATA TTCTATACCG ATGTGGATTG  
10021 CGCATACTTT GTGAACAGAA AGTGATAGCG TTGATGATTC TTCATTGGTC AGAAAATTAT  
10081 GAACGGTTTC TTCTATTTTG TCTCTATATA CTACGTATAG GAAATGTTTA CATTTTCGTA  
10141 TTGTTTTTCGA TTCACTCTAT GAATAGTTCT TACTACAATT TTTTTGTCTA AAGAGTAATA  
10201 CTAGAGATAA ACATAAAAAA TGTAGAGGTC GAGTTTAGAT GCAAGTTCAA GGAGCGAAAG  
10261 GTGGATGGGT AGGTTATATA GGGATATAGC ACAGAGATAT ATAGCAAAGA GATACTTTTTG  
10321 AGCAATGTTT GTGGAAGCGG TATTCGCAAT GGAAGCTCC ACCCCGGTTG ATAATCAGAA  
10381 AAGCCCCAAA AACAGGAAGA TTGTATAAGC AAATATTTAA ATTGTAAACG TTAATATTTT  
10441 GTTAAAATTC GCGTTAAAT TTTGTAAAT CAGCTCATTT TTTAACGAAT AGCCCCGAAAT  
10501 CGGCAAAATC CCTTATAAAT CAAAAGAATA GACCGAGATA GGGTTGAGTG TTGTTCCAGT  
10561 TTCCAACAAG AGTCCACTAT TAAAGAACGT GACTCCAAC GTCAAAGGGC GAAAAAGGGT  
10621 CTATCAGGGC GATGGCCAC TACGTGAACC ATCACCTAA TCAAGTTTTT TGGGGTCGAG  
10681 GTGCCGTAAG GCAGTAAATC GGAAGGGTAA ACGGATGCC CCATTTAGAG CTTGACGGGG  
10741 AAAGCCGGCG AACGTGGCGA GAAAGGAAGG GAAGAAAGCG AAAGGAGCGG GGGCTAGGGC  
10801 GGTGGGAAGT GTAGGGGTCA CGCTGGGCGT AACCACCACA CCCGCCGCGC TTAATGGGGC  
10861 GCTACAGGGC GCGTGGGGAT GATCCACTAG T

//

|              |                     |                                                                                                                                                                                                                                             |     |        |             |
|--------------|---------------------|---------------------------------------------------------------------------------------------------------------------------------------------------------------------------------------------------------------------------------------------|-----|--------|-------------|
| LOCUS        | pKC3703             | 10899 bp                                                                                                                                                                                                                                    | DNA | linear | 15-JUN-2012 |
| FEATURES     | Location/Qualifiers |                                                                                                                                                                                                                                             |     |        |             |
| misc_feature | 1..393              | /note="Gal Promoter"                                                                                                                                                                                                                        |     |        |             |
| misc_feature | 396..406            | /note="start of transcription "                                                                                                                                                                                                             |     |        |             |
| misc_feature | 396..446            | /note="R"                                                                                                                                                                                                                                   |     |        |             |
| misc_feature | 447..513            | /note="U5"                                                                                                                                                                                                                                  |     |        |             |
| misc_feature | 516..523            | /note="5' PBS"                                                                                                                                                                                                                              |     |        |             |
| misc_feature | 589..1209           | /note="Capsid"                                                                                                                                                                                                                              |     |        |             |
| CDS          | 589..1209           | /note=""                                                                                                                                                                                                                                    |     |        |             |
|              |                     | /translation="MSFMDQIPGGGNYPKLPVECLPNFPIQPSLTFRGRNDSHKLNKFI<br>ISEIMLNMSMISWPNDASRIVYCRRHLLNPAAQWANDFVQEQGILEITFDTFIQGLYQ<br>HFYKPPDINKIFNAITQLSEAKLGIERLNQRFRKIWDRMPPDFMTEKAAIMTYTRLLT<br>KETYNIVRMHKPETLKDAMEEAYQTTALTERFFPGFELDADGDTIIG" |     |        |             |
| misc_feature | 1210..1287          | /note=""                                                                                                                                                                                                                                    |     |        |             |
| CDS          | 1210..1287          | /note=""                                                                                                                                                                                                                                    |     |        |             |
|              |                     | /translation="ATTHLQEEYDSDYDSEDNLTQNGYVH"                                                                                                                                                                                                   |     |        |             |
| misc_feature | 1288..1461          | /note="Nucleocapsid"                                                                                                                                                                                                                        |     |        |             |
| CDS          | 1288..1461          | /note=""                                                                                                                                                                                                                                    |     |        |             |
|              |                     | /translation="TVRTRRSYNKPMNSHRNRRNNNPSREECIKNRLCFYCKKEGHRL<br>NECRARKASSNRS"                                                                                                                                                                |     |        |             |
| misc_feature | 1462..5230          | /note="POL3"                                                                                                                                                                                                                                |     |        |             |
| misc_feature | 5185..5230          | /note="U3"                                                                                                                                                                                                                                  |     |        |             |
| misc_feature | 5237..5292          | /note="MS2"                                                                                                                                                                                                                                 |     |        |             |
| misc_feature | 5650..5897          | /note="CYC terminator"                                                                                                                                                                                                                      |     |        |             |
| misc_feature | 5298..5442          | /note="U3"                                                                                                                                                                                                                                  |     |        |             |
| misc_feature | 5443..5493          | /note="R"                                                                                                                                                                                                                                   |     |        |             |
| misc_feature | 5451..5454          | /note="mapped end of transcript 1"                                                                                                                                                                                                          |     |        |             |
| misc_feature | 5472..5474          | /note="mapped end of transcript 2"                                                                                                                                                                                                          |     |        |             |
| misc_feature | 5484..5486          | /note="mapped end of transcript 3"                                                                                                                                                                                                          |     |        |             |
| misc_feature | 5491..5493          | /note="mapped end of transcript 4"                                                                                                                                                                                                          |     |        |             |
| misc_feature | 5494..5560          | /note="U5"                                                                                                                                                                                                                                  |     |        |             |
| misc_feature | 5817..5823          | /note="transcription end"                                                                                                                                                                                                                   |     |        |             |

source 1..10899  
/dnas\_title="pKC3703"

ORIGIN

```
1  ACGGATTAGA AGCCGCCGAG CGGGTGACAG CCCTCCGAAG GAAGACTCTC CTCCGTGCGT
61 CCTCGTCTTC ACCGGTCGCG TTCCTGAAAC GCAGATGTGC CTCGCGCCGC ACTGCTCCGA
121 ACAATAAAGA TTCTACAATA CTAGCTTTTA TGGTTATGAA GAGGAAAAAT TGGCAGTAAC
181 CTGGCCCCAC AAACCTTCAA ATGAACGAAT CAAATTAACA ACCATAGGAT GATAATGCGA
241 TTAGTTTTTT AGCCTTATTT CTGGGGTAAT TAATCAGCGA AGCGATGATT TTTGATCTAT
301 TAACAGATAT ATAAATGCAA AAACCTGCATA ACCACTTTAA CTAATACTTT CAACATTTTC
361 GGTTCGTATT ACTTCTTATT CAAATGTAAT AAAGATAAGT AACATTCCGT GAATTAATCT
421 GATAAACTGT TTTGACAAC TGGTACTTCC CTAAGACTGT TTATATTAGG ATTGTCGAAGA
481 CACTCCGGTA TTAATCGAGC CCGTAATACA ACACCTGGTA GCGTTAAAGG TTAATAATTG
541 TTCAAACGAA CCATCGAAAA GCCGAACCTA GCTACACCAC ACCCCAGTAT GAGCTTTATG
601 GATCAAATCC CAGGAGGAGG AAATTATCCA AAACCTCCAG TAGAATGCCT TCCTAAC TTC
661 CCGATCCAAC CATCTTTGAC CTTCAGAGGT AGAAATGACT CGCATAAACT GAAAACTTT
721 ATCTCCGAAA TAATGTTAAA CATGTCTATG ATATCTTGGC CGAATGATGC CAGTCGTATT
781 GTGTACTGCA GAAGACATTT ATTAACCCCT GCTGCTCAGT GGGCTAATGA CTTTGTACAA
841 GAACAAGGTA TACTTGAAAT AACATTGCAG ACATTCATAC AAGGATTATA TCAGCATTTT
901 TATAAGCCAC CAGATATCAA TAAAATCTTT AATGCAATCA CGCAACTTTC CGAATCTAAA
961 CTTGGTATTG AGCGTCTCAA CCAACGATTC AGAAAGATTT GGGACAGAAT GCCACCAGAC
1021 TTCATGACCG AAAAAGCTGC CATAATGACA TATACTAGGC TATTGACAAA GGAAACCTAT
1081 AATATTGTCA GAATGCACAA ACCAGAGACA TTAAAAGACG CCATGGAAGA GGCTTACCAG
1141 ACAACTGCAC TAACTGAAAG ATTCTTCCCA GGATTGGAAC TTGATGCTGA TGGAGACACT
1201 ATCATCGGTG CCACAACCCA CTTACAAGAA GAATACGACT CTGACTATGA TTCAGAAGAT
1261 AATCTGACCC AGAATGGATA CGTCCATACC GTAAGGACAA GAAGATCTTA CAATAAACCA
1321 ATGTCAAATC ATCGAAAACAG GAGAAATAAC AACCCATCTA GAGAAGAATG TATAAAAAAT
1381 CGGCTATGCT TCTATTGTAA GAAAGAGGGA CATCGCCTGA ACGAATGTAG AGCACGTAAG
1441 GCGAGTTCTA ACCGATCTTG AACTCGAATC AAAAGACCAA CAACTCCTT TTATCAAAAC
1501 CTTACCAATT GTACACTATA TCGCCATCCC CGAGATGGAC AATACCGCCG AAAAAACCAT
1561 AAAAATACAA AACACGAAAG TAAAAACCTT GTTTGACAGT GGATCACCCA CGTCATTTAT
1621 CCGAAGAGAT ATTGTAGAAC TTCTCAAATA CGAAATCTAC GAGACCCCTC CACTCCGTTT
1681 TAGAGGATTC GTAGCCACCA AATCCGCCGT TACATCCGAA GCAGTCACCA TTGACCTCAA
1741 AATCAATGAC CTGCATATAA CTTTAGCCGC GTACATACTG GATAACATGG ACTACCAATT
1801 GTTAATTGGA AATCCAATCT TACGCCGCTA CCCGAAAATC CTGCACACAG TACTGAATAC
1861 CAGAGAGAGC CCCGACTCCT TAAAGCCCAA GACTTATCGC TCCGAAACCG TTAATAACGT
1921 TAGAACCTAC TCCGCTGGTA ATCGTGGTAA CCCCAGAAAC ATAAAACCTGT CTTTGTCCCC
1981 CACCATTCTC GAAGCAACTG ACCCGAAATC CGCTGGTAAT CGTGGTGACT CCAGAACCAA
2041 AACCTGTCT CTTGCAACCA CTACTCCTGC AGCAATTGAC CCGCTTACGA CCCTTGATAA
2101 CCCAGGTAGT ACTCAAAGTA CATTGTGCGA ATTCCCAGATA CCTGAAGAAG CGAGCATCCT
2161 AGAAGAGGAT GGAAAATACT CCAACGTTGT CTCAACCATT CAGAGTGTAG AACCTAATGC
2221 TACTGATCAC AGCAATAAGG ACACCTTTTG CACTTTGCCA GTTTGGTTAC AACAGAAGTA
2281 TAGAGAGATC ATACGTAATG ATCTCCCACC AAGACCTGCC GACATTAATA ACATCCCCTG
2341 AAAACATGAT ATTGAAATTA AACCTGGCGC AAGACTACCT CGACTACAGC CATAACATGT
2401 TACAGAAAAG AACGAACAAG AAATCAACAA AATAGTCAA AAAGTCTCG ATAACAAGTT
2461 CATGTTCCC TCAAAGTCGC CTTGCAGCTC CCCTGTAGTC CTCGTCCCGA AGAAAGACGG
2521 TACCTCCGA CTCTGCGTCG ATTACCGCAC CCTGAACAAA GCTACCATCT CCGACCCATT
2581 CCCATTACCC AGAATCGACA ACCTATTGAG CCGTATTGGA AATGCCCAGA TATTACCAC
2641 GCTAGATTTG CATAGTGTT ACCACGAT CCCGATGGAA CCCAAGACC CTTACAAAAC
2701 CGCCTTTGTC ACACCATCCG GTAAGTATGA ATATACCGTC ATGCCATTTG GCTTAGTCAA
2761 TGCACCTAGT ACATTCGCAA GATACATGGC TGATACATTT AGAGACCTGA GATTGCTCAA
2821 TGTTTACCTT GATGATATAT TAATATTCTC CGAATCTCCA GAAGAACATT GGAAACATTT
2881 AGACACGGTA CTAGAAAAGAT TAAAGAACGA GAACCTCATT GTTAAGAAGA AAAAAATGTA
2941 ATTTGCATCT GAAGAAACTG AGTTTTTAGG CTATAGTATT GGAATCCAGA AAATAGCTCC
3001 ACTACAGCAC AAATGTGCAG CAATCCGAGA CTTTCCGACG CCTAAAACAG TAAAAACAAGC
3061 ACAGAGATTT TTAGGAATGA TTAATTACTA CAGACGATTC ATTCCAAATT GCTCCAAGAT
```

3121 TGCACAGCCA ATCCAAC TGT TTTATTTGTGA CAAAAGTCAA TGGACAGAAA AACAAAGACAA  
3181 GGCAATTGAT AAAC TAAAAG ACGCCTTGTG TAACTCCCC GTCCTAGTAC CAT TCAACAA  
3241 CAAAGCAAAC TACCGACTTA CAACAGACGC CTC AAAAGAC GGCATTGGTG CTGTTCTAGA  
3301 AGAAGTCGAC AACAAAGAACA AACTTGTGG TGTCGTCGGT TACTTCTCTA AATCCTTAGA  
3361 GAGTGCCCGAG AAAAACTATC CTGCTGGCGA ATTAGA ACTA CTTGGAATTA TCAAAGCACT  
3421 CCACC ACTTC CGATATATGC TTCACGGAAA GCATTT CACG TTAAGA ACAG ACCACATTAG  
3481 TTTGTTATCA TTACAAAACA AGAACGAACC CGACGAACGC GTGCAACGCT GGT TAGATGA  
3541 CCTAGCCACA TATGACTTCA CTTAGAATA CCTAGCTGGA CCCAAGAACG TTGTCGCAGA  
3601 TGCCATATCC CGTGCCGTAT ATACTATAAC CCCC GAAAACA TCCC GACCTA TCGACACAGA  
3661 AAGCTGGAAA TCTTACTACA AATCAGACCC ATTATGTAGT GCTGTCTTAA TTCATATGAA  
3721 AGAATTGACA CAACACAACG TCACACCTGA AGATATGTCA GCCTTCCGTA GTTACCAGAA  
3781 GAAACTCGAA CTATCAGAGA CCTTCCGAAA GAATTAT TCC CTAGAAGACG AAATGATCTA  
3841 TTACCAAGAC CGACTAGTAG TACCAATAAA ACAACAGAAC GCAGTTATGA GACTATATCA  
3901 TGACCATACC TTATTTGGAG GACATTTTGG TGTAACAGTG ACCCTTGCGA AAATCAGCCC  
3961 AATTTACTAT TGGCCAAAAT TACAACATTC GATCATACAA TACATCAGGA CCTGCGTACA  
4021 ATGTCAACTA ATAAAATCAC ACCGACCACG CTTACATGGA CTATTACAAC CACTCCCTAT  
4081 AGCAGAAGGA AGATGGCTTG ATATATCAAT GGATTTTGTG ACAGGATTAC CCCC GACATC  
4141 AAATAACTTG AATATGATCC TCGTCGTAGT TGATCGTTTT TCGAAACGCG C TACTTCAT  
4201 AGCTACAAGG AAAACCTTAG ACGCAACACA ACTAATAGAT CTACTCTTTC GATACATTTT  
4261 TTCATATCAT GGT TTTCCCA GGACAATAAC CAGTGATAGA GATGTCCGTA TGACCGCCGA  
4321 CAAATATCAA GAACTCACGA AAAGACTAGG AATAAAAATCG ACAATGTCTT CCGCGAACCA  
4381 CCCCCAAAACA GATGGACAAT CCGAACGAAC GATACAGACA TTAAACAGGT TACTAAGAGC  
4441 CTATGCTTCA ACCAATATTC AGAATTGGCA TGTATATTTA CCACAAATCG AATTTGTTTA  
4501 CAATTCTACA CCTACTAGAA CACTTGGAAA ATCACCATTT GAAATTGATT TAGGATATTT  
4561 ACCGAATACC CCTGCTATTA AGTCAGATGA CGAAGTCAAC GCAAGAAGTT TTACTGCCGT  
4621 AGAACTTGCC AAACACCTCA AAGCCCTTAC CATCCAAAACG AAGGAACAGC TAGAACACGC  
4681 TCAAATCGAA ATGGAAA ACTA ATAACAATCA AAGACGTAAA CCCTTATTGT TAAACATAGG  
4741 AGATCACGTA TTAGTGCATA GAGATGCATA CTTCAAGAAA GGTGCTTATA TGAAAGTACA  
4801 ACAAATATAC GTCGGACCAT TTCGAGTTGT CAAGAAAATA AACGATAACG CCTACGAACT  
4861 AGATTTAAAC TCTCACAAGA AAAAGCACAG AGTTATTAAT GTACAATTCC TGAAAAAGTT  
4921 TGTATACCGT CCAGACGCGT ACCCAAAGAA TAAACCAATC AGCTCCACTG AAAGAATTAA  
4981 GAGAGCACAC GAAGTTACTG CACTCATAGG AATAGATACT ACACACAAA CTTACTTATG  
5041 TCACATGCAA GATGTAGACC CAACACTTTC AGTAGAATAC TCAGAAGCTG AATTTGCCA  
5101 AATTC CCGAA AGAACACGAA GATCAATATT AGCCAACTTT AGACA ACTCT ACGAAACACA  
5161 AGACAACCCT GAGAGAGAGG AAGATGTTGT ATCTCAAAA T GAGATATGTC AGTATGACAA  
5221 TACGTCACCC GGCTGAACAT GAGGATCACC CATGTCTGCG GTCGACTCTA GAAACATGAG  
5281 GATCACCCAT GTCCGGGACG TTCATAAAA ACATATGAAA CAACCTTATA ACAAACGAA  
5341 CAACATGAGA CAAAACCCGA CTTCCCTAG CTGAACTACC CAAAGTATAA ATGCC TGAAC  
5401 AATTACTACTT AGTATGATTC ATATTTTATA TAATATATAA GATAAGTAAC ATTCCGTGAA  
5461 TTAATCTGAT AA ACTGTTTT GACA ACTGGT TACTTCCCTA AGACTGTTTA TATTAGGATT  
5521 GTC AAGACAC TCCGGTATTA CTCGAGCCCG TAATACAACA GGATCCACTA GTAACGGCCG  
5581 CCAGTGTGCT GGAATTCTGC AGATATCCAT CACACTGGCG GCCGCTCGAG CATGCATCTA  
5641 GAGGGCCGCA TCATGTAATT AGTTATGTCA CGCTTACATT CACGCCCTCC CCCCATCC  
5701 GCTCTAACCG AAAAGGAAGG AGTTAGACAA CCTGAAGTCT AGGTCCCTAT TTATTTTTTT  
5761 ATAGTTATGT TAGTATTAAG AACGTTATTT ATATTTCAA TTTTCTTTT TTTCTGTAC  
5821 AGACGCGTGT ACGCATGTAA CATT TACTG AAAACCTTGC TTGAGAAGGT TTTGGGACGC  
5881 TCGAAGGCTT TAATTTGCCG GCCCTGCATT AATGAATCGG CCAACGCGCG GGGAGAGCG  
5941 GTTTGCCTAT TGGGCGCTCT TCCGTTCTT CGCTCACTGA CTCGCTGCGC TCGTCTGTTT  
6001 GGTGCGGCG AGCGGTATCA GCTCACTCAA AGCCGTAAT ACGGTTATCC ACAGAATCAG  
6061 GGGATAACGC AGGAAAGAAC ATGTGAGCAA AAGGCCAGCA AAAGCCAGG AACCGTAAAA  
6121 AGGCCGCGTT GCTGGCGTTT TTCCATAGGC TCCGCCCCC TGACGAGCAT CACAAAATC  
6181 GACGCTCAAG TCAGAGGTGG CGAAACCCGA CAGGACTATA AAGATACCAG GCGTTTCCCC  
6241 CTGGAAGCTC CCTCGTGCGC TCTCCTGTTT CGACCTGCC GCTTACC GGA TACCTGTCCG  
6301 CCTTCTCCC TTCCGGGAAGC GTGGCGCTTT CTCATAGCTC ACGCTGTAGG TATCTCAGTT  
6361 CGGTGTAGGT CGTTGCTCC AAGCTGGGCT GTGTGCACGA ACCCCCCGTT CAGCCCGACC

6421 GCTGCGCCTT ATCCGGTAAC TATCGTCTTG AGTCCAACCC GGTAAGACAC GACTTATCGC  
6481 CACTGGCAGC AGCCACTGGT AACAGGATTA GCAGAGCGAG GTATGTAGGC GGTGCTACAG  
6541 AGTTCCTTGAA GTGGTGGCCT AACTACGGCT AACTAGAAAG GACAGTATTT GGTATCTGCG  
6601 CTCTGCTGAA GCCAGTTACC TTCGGAAAAA GAGTTGGTAG CTCTTGATCC GGCAAACAAA  
6661 CCACCGCTGG TAGCGGTGGT TTTTTTGT TTTTTCAGCA GATTACGCGC AGAAAAAAG  
6721 GATCTCAAGA AGATCCTTTG ATCTTTTCTA CGGGGTCTGA CGCTCAGTGG AACGAAAAC T  
6781 CACGTTAAGG GATTTTGGTC ATGAGATTAT CAAAAAGGAT CTTACCTAG ATCCTTTTAA  
6841 ATTAAAAATG AAGTTTTAAA TCAATCTAAA GTATATATGA GTAAACTTGG TCTGACAGTT  
6901 ACCAATGCTT AATCAGTGAG GCACCTATCT CAGCGATCTG TCTATTTCTG TCATCCATAG  
6961 TTGCCTGACT CCCCCTCGTG TAGATAACTA CGATACGGGA GCGCTTACCA TCTGGCCCCA  
7021 GTGCTGCAAT GATACCGCGA GACCCACGCT CACCGGCTCC AGATTTATCA GCAATAAAC  
7081 AGCCAGCCGG AAGGGCCGAG CGCAGAAGTG GTCCTGCAAC TTTATCCGCC TCCATTCAGT  
7141 CTATTAATTG TTGCCGGGAA GCTAGAGTAA GTAGTTCGCC AGTTAATAGT TTGCGCAACG  
7201 TTGTTGGCAT TGCTACAGGC ATCGTGGTGT CACTCTCGTC GTTTGGTATG GCTTCATTC  
7261 GCTCCGGTTC CCAACGATCA AGGCGAGTTA CATGATCCCC CATGTTGTGC AAAAAAGCGG  
7321 TTAGTCTCCT CGGTCTCCG ATCGTTGTCA GAAGTAAGTT GGCCGCAGTG TTATCACTCA  
7381 TGGTTATGGC AGCACTGCAT AATTCTCTTA CTGTCATGCC ATCCGTAAGA TGCTTTTCTG  
7441 TGACTGGTGA GTACTCAACC AAGTCATTCT GAGAATAGTG TATGCGGCGA CCGAGTTGCT  
7501 CTTGCCCGGC GTCAATACGG GATAATAGTG TATCACATAG CAGAACTTA AAAGTCTCA  
7561 TCATTGGAAA ACGTTCTTCG GGGCGAAAAAC TCTCAAGGAT CTTACCGCTG TTGAGATCCA  
7621 GTTCGATGTA ACCCACTCGT GCACCCAAC TATCTTCAGC ATCTTTTACT TTCACCAGCG  
7681 TTTCTGGGTG AGCAAAAAACA GGAAGGCAAA ATGCCGCAAA AAAGGGAATA AGGGCGACAC  
7741 GGAAATGTTG AATACTCATA CTCTTCTTTT TTCAATGGGT AATAACTGAT ATAATTAAT  
7801 TGAAGCTCTA ATTTGTGAGT TTAGTATACA TGCATTTACT TATAATACAG TTTTTTAGTT  
7861 TTGCTGGCCG CATCTTCTCA AATATGCTTC CCAGCCTGCT TTTCTGTAAC GTTCACCCTC  
7921 TACCTTAGCA TCCCTTCCCT TTGCAATAG TCCTCTTCCA ACAATAATAA TGTCAGATCC  
7981 TGTAGAGACC ACATCATCCA CGGTTCTATA CTGTTGACCC AATGCGTCTC CCTTGTCTC  
8041 TAAACCCACA CCGGGTGTCA TAATCAACCA ATCGTAACCT TCATCTCTTC CACCCATGTC  
8101 TCTTTGAGCA ATAAAGCCGA TAACAAAATC TTTGTGCTC TTCGCAATGT CAACAGTACC  
8161 CTTAGTATAT TCTCCAGTAG ATAGGGAGCC CTTGCATGAC AATTCTGCTA ACATCAAAG  
8221 GCCTCTAGGT TCCTTTGTTA CTTCTTCTGC CGCCTGCTTC AAACCGCTAA CAATACCTGG  
8281 GCCCACCACA CCGTGTGCAT TCGTAATGTC TGCCCATCT GCTATTCTGT ATACACCCGC  
8341 AGAGTACTGC AATTTGACTG TATTACCAAT GTCAGCAAAT TTTCTGTCTT CGAAGAGTAA  
8401 AAAATTGTAC TTGGCGGATA ATGCCTTTAG CGGCTTAACT GTGCCCTCCA TGGAAAAATC  
8461 AGTCAAGATA TCCACATGTG TTTTTAGTAA ACAAATTTTG GGACCTAATG CTTCAACTAA  
8521 CTCCAGTAAT TCCTTGGTGG TACGAACATC CAATGAAGCA CACAAGTTTG TTTGCTTTTC  
8581 GTGCATGATA TTAAATAGCT TGGCAGCAAC AGGACTAGGA TGAGTAGCAG CACGTTCTTT  
8641 ATATGTAGCT TTTCGACATGA TTTATCTTCG TTTCTGTCAG GTTTTTGTTC TGTGCAAGTT  
8701 GGTAAAGAAT ACTGGGCAAT TTCATGTTTC TTCAACACTA CATATGCGTA TATATACCAA  
8761 TCTAAGTCTG TGCTCCTTCC TTCGTTCTTC CTTCTGTTCG GAGATTACCG AATCAAAAAA  
8821 ATTTCAAAGA AACCGAAATC AAAAAAAGA ATAAAAAAA AATGATGAAT TGAAATTGAAA  
8881 AGCTAGCTTA TCGATGATAA GCTGTCAAAG ATGAGAAATTA ATTCCACGGA CTATAGACTA  
8941 TACTAGATAC TCCGTCTACT GTACGATACA CTTCCGCTCA GGTCTTTGTC CTTTAAACGAG  
9001 GCCTTACCAC TCTTTTGTTA CTCTATTGAT CCAGCTCAGC AAAGGCAGTG TGATCTAAGA  
9061 TTCATCTTTC GCGATGTAGT AAAACTAGCT AGACCGAGAA AGAGACTAGA AATGCAAAAG  
9121 GCACTTCTAC AATGGCTGCC ATCATTATTA TCCGATGTGA CGCTGCAGCT TCTCAATGAT  
9181 ATTCGAATAC GCTTTGAGGA GATACAGCCT AATATCCGAC AAAGTGGTTT ACAGATTTAC  
9241 GATCGTACTT GTTACCCATC ATTGAATTTT GAACATCCGA ACCTGGGAGT TTTCCCTGAA  
9301 ACAGTAGTAA TATTTGAACC TGTATAATAA TATATAGTCT AGCGCTTTAC GGAAGACAAT  
9361 GTATGTATTT CGGTTCTTGG AGAAACTATT GCATCTATTG CATAGGTAAT CTGTCACGTC  
9421 GCATCCCCGG TTCATTTTCT GCGTTTCCAT CTTGCACTTC AATAGCATAT CTTTGTAAAC  
9481 GAAGCATCTG TGCTTCATTT TGTAGAACAA AAATGCAACG CGAGAGCGCT AATTTTTCAA  
9541 ACAAAGAATC TGAGCTGCAT TTTTACAGAA CAGAAATGCA ACGCGAAAGC GCTATTTTAC  
9601 CAACGAAGAA TCTGTGCTTC ATTTTTGTAA AACAAAAATG CAACGCGACG AGAGCGCTAA  
9661 TTTTTCAAAC AAAGAATCTG AGCTGCATTT TTACAGAACA GAAATGCAAC GCGAGAGCGC

9721 TATTTTACCA ACAAAGAATC TATACTTCTT TTTTGTCTA CAAAAATGCA TCCCGAGAGC  
9781 GCTATTTTTT TAACAAAGCA TCCTAGATTA CTTTTTTTCT CCTTTGTGCG CTCTATAATG  
9841 CAGTCTCTTG ATAACTTTTT GCACTGTAGG TCCGTTAAGG TTAGAAGAAG GCTACTTTGG  
9901 TGTCTATTTT CTCTTCCATA AAAAAAGCCT GACTCCACTT CCCGCGTTTA CTGATTACTA  
9961 GCGAAGCTGC GGGTGCATTT TTTCAAGATA AAGGCATCCC CGATTATATT CTATACCGAT  
10021 GTGGATTGCG CATACTTTGT GAACAGAAAG TGATAGCGTT GATGATTCTT CATTTGGTCAG  
10081 AAAATTATGA ACGGTTTCTT CTATTTTGTG TCTATATACT ACGTATAGGA AATGTTTACA  
10141 TTTTCGTATT GTTTTTCGATT CACTCTATGA ATAGTTCTTA CTACAATTTT TTTGTCTAAA  
10201 GAGTAATACT AGAGATAAAC ATAAAAAATG TAGAGGTCGA GTTTAGATGC AAGTTCAAGG  
10261 AGCGAAAGGT GGATGGGTAG GTTATATAGG GATATAGCAC AGAGATATAT AGCAAAGAGA  
10321 TACTTTTGAG CAATGTTTGT GGAAGCGGTA TTCGCAATGG GAAGCTCCAC CCCGGTTGAT  
10381 AATCAGAAAA GCCCAAAAA CAGGAAGATT GTATAAGCAA ATATTTAAAT TGTAACCGTT  
10441 AATATTTTGT TAAAATTCGC GTTAAATTTT TGTTAAATCA GTCATTTTTT TAACGAATAG  
10501 CCCGAAATCG GCAAAATCCC TTATAAATCA AAAGAATAGA CCGAGATAGG GTTGAGTGTT  
10561 GTTCCAGTTT CCAACAAGAG TCCACTATTA AAGAACGTGG ACTCCAACGT CAAAGGGCGA  
10621 AAAAGGGTCT ATCAGGGCGA TGGCCCACTA CGTGAACCAT CACCCTAATC AAGTTTTTTG  
10681 GGGTCGAGGT GCCGTAAAGC AGTAAATCGG AAGGGTAAAC GGATGCCCCC ATTTAGAGCT  
10741 TGACGGGGAA AGCCGGCGAA CGTGGCGAGA AAGGAAGGGA AGAAAGCGAA AGGAGCGGGG  
10801 GCTAGGGCGG TGGGAAGTGT AGGGGTCACG CTGGGCGTAA CCACCACACC CGCCGCGCTT  
10861 AATGGGGCGC TACAGGGCGC GTGGGGATGA TCCACTAGT

//

LOCUS pNB2241 10561 bp DNA linear 15-JUN-2012

FEATURES Location/Qualifiers  
misc\_feature 394..399  
/note="transcription start site"  
misc\_feature 507..516  
/note="translation intiation sequence"  
misc\_feature 5161..5229  
/note="MS2 sequence"  
misc\_feature 5313..5560  
/note="CYC terminator"  
misc\_feature 5480..5486  
/note="transcription end"  
misc\_feature 1..451  
/note="GAL1"  
misc\_feature 517..1137  
/note="Capsid"  
CDS 517..1137  
/note=""  
/translation="MSFMDQIPGGGNYPKLPVECLPNFPIQPSLTFRGRNDSHKLNKFI  
ISEIMLNMSMISWPNDASRIVYCCRHLNPAQWANDFVQEQGILEITFDTFIQGLYQ  
HFYKPPDINKIFNAITQLSEAKLGIERLNQRFRKIWDRMPPDFMTEKAAIMTYTRLLT  
KETYNIVRMHKPETLKDAMEEAYQTTALTERFFPGFELDADGDITIIG"  
misc\_feature 1138..1215  
/note=""  
CDS 1138..1215  
/note=""  
/translation="ATTHLQEEYDSYDSEDNLTQNGYVH"  
misc\_feature 1216..1389  
/note="Nucleocapsid"  
CDS 1216..1389  
/note=""  
/translation="TVRTRRSYNKPMNSHRNRRNNNPSREECIKNRLCFYCKKEGHR  
NECRARKASSNRS"  
misc\_feature 1390..5158  
/note="POL3"  
misc\_feature 5113..5158  
/note="U3"  
source 1..10561  
/dnas\_title="pNB2241"

ORIGIN

1 ACGGATTAGA AGCCGCCGAG CGGGTGACAG CCCTCCGAAG GAAGACTCTC CTCCGTGCGT  
61 CCTCGTCTTC ACCGGTCGCG TTCCTGAAAC GCAGATGTGC CTCGCGCCGC ACTGCTCCGA  
121 ACAATAAAGA TTCTACAATA CTAGCTTTTA TGGTTATGAA GAGGAAAAAT TGGCAGTAAC  
181 CTGGCCCCAC AAACCTTCAA ATGAACGAAT CAAATTAACA ACCATAGGAT GATAATGCGA  
241 TTAGTTTTTT AGCCTTATTT CTGGGGTAAT TAATCAGCGA AGCGATGATT TTTGATCTAT  
301 TAACAGATAT ATAAATGCAA AAACCTGATA ACCACTTTAA CTAATACTTT CAACATTTTC  
361 GGTTTGTATT ACTTCTTATT CAAATGTAAT AAAAGTATCA AAAAAAATT GTTAATATAC  
421 CTCTATACTT TAACGTCAAG GAGAAAAAAC CCCGGATCGG ACTACTAGCA GCTGTAATAC  
481 GACTCACTAT AGGGAATATT AAGCTTACAC CCCAGTATGA GCTTTATGGA TCAAATCCCA  
541 GGAGGAGGAA ATTATCCAAA ACTCCAGTA GAATGCCTTC CTAACTTCCC GATCCAACCA  
601 TCTTTGACCT TCAGAGGTAG AAATGACTCG CATAAACTGA AAAACTTTAT CTCCGAAATA  
661 ATGTTAAACA TGTCTATGAT ATCTTGGCCG AATGATGCCA GTCGTATTGT GACTGCAGA  
721 AGACATTTAT TAAACCCCGC TGCTCAGTGG GCTAATGACT TTGTACAAGA ACAAGGTATA  
781 CTTGAAATAA CATTTCGACAC ATTCATACAA GGATTATATC AGCATTTCTA TAAGCCACCA  
841 GATATCAATA AAATCTTTAA TGCAATCAGC CAACTTTCCG AAGCTAAACT TGGTATTGAG

901 CGTCTCAACC AACGATTCAG AAAGATTTGG GACAGAATGC CACCAGACTT CATGACCGAA  
 961 AAAGCTGCCA TAATGACATA TACTAGGCTA TTGACAAAGG AAACCTATAA TATTGTCAGA  
 1021 ATGCACAAAC CAGAGACATT AAAAGACGCC ATGGAAGAGG CTTACCAGAC AACTGCACTA  
 1081 ACTGAAAGAT TCTTCCCAGG ATTCGAACTT GATGCTGATG GAGACACTAT CATCGGTGCC  
 1141 ACAACCCACT TACAAGAAGA ATACGACTCT GACTATGATT CAGAAGATAA TCTGACCCAG  
 1201 AATGGATACG TCCATACCGT AAGGACAAGA AGATCTTACA ATAAACCAAT GTCAAATCAT  
 1261 CGAAACAGGA GAAATAACAA CCCATCTAGA GAAGAATGTA TAAAAAATCG GCTATGC'TTC  
 1321 TATTGTAAGA AAGAGGGACA TCGCCTGAAC GAATGTAGAG CACGTAAGGC GAGTTC'TAAC  
 1381 CGATCTTGAA CTCGAATCAA AAGACCAACA AACTCCTTTT ATCAAAACCT TACCAATTGT  
 1441 AACTATATC GCCATCCCCG AGATGGACAA TACCGCCGAA AAAACCATAA AAATACAAAA  
 1501 CACGAAAGTA AAAACCTGT T'TGACAGTGG ATCACCACG TCATTTATCC GAAGAGATAT  
 1561 TG'TAGA'ACTT CTCAAATACG AAATCTACGA GACCCCTCCA CTCCGTTTTA GAGGATTCGT  
 1621 AGCCACCAA TCCGCCGTTA CATCCGAAGC AGTCACCATT GACCTCAAAA TCAATGACCT  
 1681 GCATATAACT TTAGCCGCGT ACATACTGGA TAACATGGAC TACCAATTGT TAAT'TGGAAA  
 1741 TCCAATCTTA CGCCGCTACC CGAAAATCCT GCACACAGTA CTGAATACCA GAGAGAGCCC  
 1801 CGACTCCTTA AAGCCCAAGA CTTATCGCTC CGAAACCGTT AATAACGTTA GAACCTACTC  
 1861 CGCTGGTAAT CGTGGTAACC CCAGAAACAT AAAACTGTCT TTTGCCCCCA CCAT'TCTCGA  
 1921 AGCAAATGAC CCGAAATCCG CTGGTAACTG TGGTGACTCC AGAACCAAAA CCCTGTCTCT  
 1981 TGCAACCACT ACTCCTGCAG CAATTGACCC C'GTTACGACC CTTGATAACC CAGGTACTAC  
 2041 TCAAAGTACA TTTGCGCAAT TCCCGATACC TGAAGAAGCG AGCATCCTAG AAGAGGATGG  
 2101 AAAATACTCC AACGTTGTCT CAACCATTCA GAGTGTAGAA CCTAATGCTA CTGATCACAG  
 2161 CAATAAGGAC ACCTTTTGCA CTTTGCCAGT TTGGTTACAA CAGAAGTATA GAGAGATCAT  
 2221 ACGTAATGAT CTCCCACCAA GACCTGCCGA CATTAATAAC ATCCCCGTAA AACATGATAT  
 2281 TGA'AAT'AAA CCTGGCGCAA GACTACCTCG ACTACAGCCA TACCATGTTA CAGAAAAGAA  
 2341 CGAACAAGAA ATCAACAAAA TAGTTCAAAA ACTGCTCGAT AACAAAGTTC TTGTTCCCTC  
 2401 AAAGTCGCCT TGCAGCTCCC CTGTAGTCCT CGTCCCGAAG AAAGACGGTA CCTTCCGACT  
 2461 CTGCGTCGAT TACCGCACCC TGAACAAAGC TACCATCTCC GACCCATTCC CATTACCCAG  
 2521 AATCGACAAC CTATTGAGCC GTATTGGAAA TGCCAGATA TTTACCACGC TAGATTTGCA  
 2581 TAGTGGTTAC CACCAGATCC CGATGGAACC CAAAGACCGC TACAAAACCG CCTTGTGCAC  
 2641 ACCATCCGGT AAGTATGAAT ATACCGTCAT GCCATTTGGC TTAGTCAATG CACCTAGTAC  
 2701 ATTCGCAAGA TACATGGCTG ATACATTTAG AGACCTGAGA TTCGTCAATG TTTACCTTGA  
 2761 TGATATATTA ATATTCTCCG AATCTCCAGA AGAACATTGG AACATTTAG ACACGGTACT  
 2821 AGAAAGATTA AAGAACGAGA ACCTCATTGT TAAGAAGAAA AAATGTAAAT TTGCATCTGA  
 2881 AGAAACTGAG TTTT'TAGGCT ATAGTATTGG AATCCAGAAA ATAGCTCCAC TACAGCACAA  
 2941 ATGTGCAGCA ATCCGAGACT TTCCGACGCC TAAAACAGTA AAACAAGCAC AGAGATTTTT  
 3001 AGGAATGATT AATTACTACA GACGATTCAT TCCAAATTCG TCCAAGATTG CACAGCCAAT  
 3061 CCAACTGTTT ATTTGTGACA AAAGTCAATG GACAGAAAAA CAAGACAAGG CAATTGATAA  
 3121 ACTAAAAGAC GCCTTGTGTA ACTCCCCCGT CCTAGTACCA TTCAACAACA AAGCAA'ACTA  
 3181 CCGACTTACA ACAGACGCC TCAAAGACGG CATTGGTGCT GTTCTAGAAG AAGTCGACAA  
 3241 CAAGAACAAA CTTGTTGGTG TCGTCGGTTA CTTCTCTAAA TCCTTAGAGA GTGCCCAGAA  
 3301 AA'ACTATCCT GCTGGCGAAT TAGAACTACT TGGAATTATC AAAGCACTCC ACCACTTCCG  
 3361 ATATATGCTT CACGGAAAAGC ATTTACGTT AAGAACAGAC CACATTAGTT TGTTATCATT  
 3421 ACAAACAAG AACGAACCCG ACGAACGCGT GCAACGCTGG TTAGATGACC TAGCCACATA  
 3481 TGACTTCACC TTAGAATACC TAGCTGGACC CAAGAACGTT GTCGCAGATG CCATATCCCG  
 3541 TGCCGTATAT ACTATAACCC CCGAAACATC CCGACCTATC GACACAGAAA GCTGGAAATC  
 3601 T'TACT'ACAAA TCAGACCCAT TATGTAGTGC TGTCTTAAT T CATATGAAAG AATGACACA  
 3661 ACACAACGTC ACACCTGAAG ATATGTCAGC CTTCCGTAGT TACCAGAAGA AACTCGA'ACT  
 3721 ATCAGAGACC TTCCGAAAAGA ATTATTCCCT AGAAGACGAA ATGATCTATT ACCAAGACCG  
 3781 ACTAGTAGTA CCAATAAAAC AACAGAACGC AGTTATGAGA CTATATCATG ACCATACCTT  
 3841 ATTTGGAGGA CATTTTGGTG TAACAGTGAC CTTTGC'GAAA ATCAGCCCAA TTTACTATTG  
 3901 GCCAAAATTA CAACATTCGA TCATACAATA CATCAGGACC TGCGTACAAT GTCAACTAAT  
 3961 AAAATCACAC CGACCACGCT TACATGGACT ATTACAACCA CTCCCTATAG CAGAAGGAAG  
 4021 ATGGCTTGAT ATATCAATGG ATTTTGTGAC AGGATTACCC CCGACATCAA ATA'ACTTGAA  
 4081 TATGATCCTC GTCGTAGTTG ATCGTTTTTC GAAACGCGCT CACTTCATAG CTACAAGGAA  
 4141 AACCTTAGAC GCAACACAAC TAATAGATCT ACTCTTTCGA TACATTTTTT CATATCATGG



4201 TTTTCCCAGG ACAATAACCA GTGATAGAGA TGTCCGTATG ACCGCCGACA AATATCAAGA  
4261 ACTCACGAAA AGACTAGGAA TAAAATCGAC AATGTCTTCC GCGAACCACC CCCAAACAGA  
4321 TGGACAATCC GAACGAACGA TACAGACATT AAACAGGTTA CTAAGAGCCT ATGCTTCAAC  
4381 CAATATTCAG AATTGGCATG TATATTTACC ACAAATCGAA TTTGTTTACA ATTCTACACC  
4441 TACTAGAACA CTTGGAAAAT CACCATTTGA AATTGATTTA GGATATTTAC CGAATACCCC  
4501 TGCTATTAAG TCAGATGACG AAGTCAACGC AAGAAGTTTT ACTGCCGTAG AACTTGCCAA  
4561 ACACCTCAAA GCCCTTACCA TCCAAACGAA GGAACAGCTA GAACACGCTC AAATCGAAAT  
4621 GGAAACTAAT AACAATCAAA GACGTAAACC CTTATTTGTTA AACATAGGAG ATCACGTATT  
4681 AGTGCATAGA GATGCATACT TCAAGAAAGG TGCTTATATG AAAGTACAAC AAATATACGT  
4741 CGGACCATTT CGAGTTGTCA AGAAAATAAA CGATAACGCC TACGAACTAG ATTTAAACTC  
4801 TCACAAGAAA AAGCACAGAG TTATTAATGT ACAATTCCTG AAAAAGTTTG TATACCGTCC  
4861 AGACGCGTAC CCAAAGAATA AACCAATCAG CTCCACTGAA AGAATTAAGA GAGCACACGA  
4921 AGTTACTGCA CTCATAGGAA TAGATACTAC ACACAAAAC TACTTATGTC ACATGCAAGA  
4981 TGTAGACCCA ACACTTTCAG TAGAATACTC AGAAGCTGAA TTTTGCCAAA TTCCCGBAAAG  
5041 AACACGAAGA TCAATATTAG CCAACTTTAG ACAACTCTAC GAAACACAAG ACAACCTGA  
5101 GAGAGAGGAA GATGTTGTAT CTCAAATGA GATATGTCAG TATGACAATA CGTCACCCGG  
5161 CTGAACATGA GGATCACCCA TGTCCTGCGT CGACTCTAGA AACATGAGGA TCACCCATGT  
5221 CCGGGATCCA CTAGTAACGG CCGCCAGTGT GCATGGAATC TGCAGATATC CATCACACTG  
5281 GCGGCCGCTC TAGCATGCAT CTAGAGGGCC GCATCATGTA ATTAGTTATG TCACGCTTAC  
5341 ATTACGCCCC TCCCCCACA TCCGCTCTAA CCGAAAAGGA AGGAGTTAGA CAACCTGAAG  
5401 TCTAGGTCCC TATTTATTTT TTTATAGTTA TGTTAGTATT AAGAACGTTA TTTATATTTT  
5461 AAATTTTTCT TTTTTTCTG TACAGACGCG TGTACGCATG TAACATTATA CTGAAAACCT  
5521 TGCTTGAGAA GGTTTTGGGA CGCTCGAAGG CTTTAATTTG CGGCCCTGCA TTAATGAATC  
5581 GGCCAACGCG CGGGGAGAGG CGGTTTGCCT ATTGGGCGCT CTTCCGCTTC CTCGCTCACT  
5641 GACTCGCTGC GCTCGGTCGT TCGGCTGCGG CGAGCGGTAT CAGCTCACTC AAAGGCGGTA  
5701 ATACGGTTAT CCACAGAATC AGGGGATAAC GCAGGAAAGA ACATGTGAGC AAAAGGCCAG  
5761 CAAAAGCCCA GGAACCGTAA AAAGGCCGCG TTGCTGGCGT TTTTCCATAG GCTCCGCCCC  
5821 CCTGACGAGC ATCACAAAAA TCGACGCTCA AGTCAGAGGT GGCGAAACCC GACAGGACTA  
5881 TAAAGATACC AGGCGTTTCC CCCTGGAAGC TCCCTCGTGC GCTCTCCTGT TCCGACCCTG  
5941 CCGCTTACCG GATACCTGTC CGCCTTTCTC CCTTCGGGAA GCGTGGCGCT TTCTCATAGC  
6001 TCACGCTGTA GGTATCTCAG TTCGGTGTAG GTCGTTGCT CCAAGCTGGG CTGTGTGCAC  
6061 GAACCCCCCG TTCAGCCCGA CCGCTGCGCC TTATCCGGTA ACTATCGTCT TGAGTCCAAC  
6121 CCGGTAAGAC ACGACTTATC GCCACTGGCA GCAGCCACTG GTAACAGGAT TAGCAGAGCG  
6181 AGGTATGTAG GCGGTGCTAC AGAGTTCTTG AAGTGGTGGC CTAACTACGG CTACACTAGA  
6241 AGGACAGTAT TTGGTATCTG CGCTCTGCTG AAGCCAGTTA CCTTCGAAA AAGAGTTGGT  
6301 AGCTCTTGAT CCGGCAAACA AACCACCGCT GGTAGCGGTG GTTTTTTTGT TTGCAAGCAG  
6361 CAGATTACGC GCAGAAAAAA AGGATCTCAA GAAGATCCTT TGATCTTTTC TACGGGGTCT  
6421 GACGCTCAGT GGAACGAAAA CTCACGTTAA GGGATTTTGG TCATGAGATT ATCAAAAAGG  
6481 ATCTTACCT AGATCCTTTT AAATTAATAA TGAAGTTTAA AATCAATCTA AAGTATATAT  
6541 GAGTAAACTT GGTCTGACAG TTACCAATGC TTAATCAGTG AGGCACCTAT CTCAGCGATC  
6601 TGTCTATTTT GTTCATCCAT AGTTGCCTGA CTCCCCGTCG TGTAGATAAC TACGATACGG  
6661 GAGCGCTTAC CATCTGGCCC CAGTGCTGCA ATGATACCGC GAGACCCACG CTCACCGGCT  
6721 CCAGATTTAT CAGCAATAAA CCAGCCAGCC GGAAGGGCCG AGCGCAGAAG TGGTCTTGCA  
6781 ACTTTATCCG CCTCCATTC AGTCTATTAAT TGTTGCCGGG AAGCTAGAGT AAGTAGTTCCG  
6841 CCAGTTAATA GTTTGCGCAA CGTTGTTGGC ATTGCTACAG GCATCGTGGT GTCACCTCG  
6901 TCGTTTGGTA TGGCTTCAT CAGCTCCGGT TCCCAACGAT CAAGGCGAGT TACATGATCC  
6961 CCCATGTTGT GCAAAAAAGC GGTTAGCTCC TTCGGTCTC CGATCGTTGT CAGAAGTAAG  
7021 TTGGCCGCTG TGTTATCACT CATGGTTATG GCAGCACTGC ATAATCTCT TACTGTCAATG  
7081 CCATCCGTAA GATGCTTTTCT GTGTACTGGT GAGTACTCAA CCAAGTCATT CTGAGAATAG  
7141 TGTATGCGGC GACCGAGTTG CTCTTGCCCG GCGTCAATAC GGGATAATAG TGTATCACAT  
7201 AGCAGAACTT TAAAAGTGCT CATCATGGGA AAACGTTCTT CGGGGCGAAA ACTCTCAAGG  
7261 ATCTTACCGC TGTTGAGATC CAGTTCGATG TAACCCACTC GTGCACCCAA CTGATCTTCA  
7321 GCATCTTTTA CTTTACCAG CGTTTCTGGG TGAGCAAAAA CAGGAAGGCA AAATGCCGCA  
7381 AAAAAGGGAA TAAGGGCGAC ACGGAAATGT TGAATACTCA TACTCTTCTT TTTTCAATGG  
7441 GTAATAACTG ATATAATTAA ATTGAAGCTC TAATTTGTGA GTTTAGTATA CATGCATTTA

7501 CTTATAATAC AGTTTTTTAG TTTTGCTGGC CGCATCTTCT CAAATATGCT TCCCAGCCTG  
7561 CTTTTCTGTA ACGTTCACCC TCTACCTTAG CATCCCTTCC CTTTGCAAAT AGTCCTCTTC  
7621 CAACAATAAT AATGTCAGAT CCTGTAGAGA CCACATCATC CACGGTTCTA TACTGTTGAC  
7681 CCAATGCGTC TCCCTTGTCA TCTAAACCCA CACCGGGTGT CATAATCAAC CAATCGTAAC  
7741 CTTTCATCTCT TCCACCCATG TCTCTTTGAG CAATAAAGCC GATAACAAAA TCTTTGTGCG  
7801 TCTTCGCAAT GTCAACAGTA CCCTTAGTAT ATTCTCCAGT AGATAGGGAG CCCTTGCATG  
7861 ACAATTCCTGC TAACATCAAA AGGCCTCTAG GTTCCTTTGT TACTTCTTCT GCCGCCTGCT  
7921 TCAAACCGCT AACAATACCT GGGCCACCA CACCGTGTGC ATTCTGTAATG TCTGCCCAT  
7981 CTGCTATTCT GTATACACCC GCAGAGTACT GCAATTTGAC TGTATTACCA ATGTCAGCAA  
8041 ATTTTCTGTC TTCGAAGAGT AAAAAATTGT ACTTGGCGGA TAATGCCTTT AGCGGCTTAA  
8101 CTGTGCCCTC CATGGAAAAA TCAGTCAAGA TATCCACATG TGTTTTTGTAGT AAACAAAATTT  
8161 TGGGACCTAA TGCTTCAACT AACTCCAGTA ATTCTTGGT GGTACGAACA TCCAATGAAG  
8221 CACACAAGTT TGTTTTGCTTT TCGTGCATGA TATTAATAAG CTTGGCAGCA ACAGGACTAG  
8281 GATGAGTAGC AGCACGTTCC TTATATGTAG CTTTCGACAT GATTTATCTT CGTTTCCCTGC  
8341 AGGTTTTTGT TCTGTGCAGT TGGGTTAAGA ATACTGGGCA ATTTTCATGTT TCTTCAACAC  
8401 TACATATGCG TATATATACC AATCTAAGTC TGTGCTCCTT CCTTCGTTCT TCCTTCTGTT  
8461 CGGAGATTAC CGAATCAAAA AAATTTCAA GAAACCGAAA TCAAAAAAAA GAATAAAAAA  
8521 AAAATGATGA ATTGAATTGA AAAGCTAGCT TATCGATGAT AAGCTGTCAA AGATGAGAAT  
8581 TAATCCACG GACTATAGAC TATACTAGAT ACTCCGTCTA CTGTACGATA CACTTCCGCT  
8641 CAGTTCCTTG TCCTTTAACG AGGCCTTACC ACTCTTTTGT TACTCTATTG ATCCAGCTCA  
8701 GCAAAGGCAG TGTGATCTAA GATTCTATCT TCGCGATGTA GTAAAACCTAG CTAGACCGAG  
8761 AAAGAGACTA GAAATGCAAA AGGCACTTCT ACAATGGCTG CCATCATTAT TATCCGATGT  
8821 GACGCTGCAG CTTCTCAATG ATATTCGAAT ACGCTTTGAG GAGATACAGC CTAATATCCG  
8881 ACAAACCTGTT TTACAGATTT ACGATCGTAC TTGTTACCCA TCATTGAATT TTGAACATCC  
8941 GAACCTGGGA GTTTTCCCTG AAACAGATAG TATATTTGAA CCTGTATAAT AATATATAGT  
9001 CTAGCGCTTT ACGGAAGACA ATGTATGTAT TTCGGTTCCT GGAGAAACTA TTGCATCTAT  
9061 TGCATAGGTA ATCTTGCACG TCGCATCCCC GGTTCATTTT CTGCGTTTTCC ATCTTGCACT  
9121 TCAATAGCAT ATCTTTGTTA ACGAAGCATC TGTGCTTCAT TTTGTAGAAC AAAAATGCAA  
9181 CGCGAGAGCG CTAATTTTTT AAACAAAGAA TCTGAGCTGC ATTTTTTACAG AACAGAAATG  
9241 CAACGCGAAA GCGCTATTTT ACCAACGAAG AATCTGTGCT TCATTTTTTGT AAAACAAAAA  
9301 TGCAACGCGA CGAGAGCGCT AATTTTTTCAA ACAAAGAATC TGAGCTGCAT TTTTACAGAA  
9361 CAGAAATGCA ACGCGAGAGC GCTATTTTAC CAACAAAGAA TCTATACTTC TTTTTTGTTC  
9421 TACAAAAATG CATCCCGAGA GCGCTATTTT TCTAACAAAG CATCTTAGAT TACTTTTTTT  
9481 CTCCTTTGTG CGCTCTATAA TGCAGTCTCT TGATAACTTT TTGCACTGTA GGTCCGTTAA  
9541 GGTTAGAAGA AGGCTACTTT GGTGTCTATT TTCTCTTCCA TAAAAAAGC CTGACTCCAC  
9601 TTCCCGCGTT TACTGATTAC TAGCGAAGCT GCGGGTGCAT TTTTTCAAGA TAAAGGCATC  
9661 CCCGATTATA TTCTATACCG ATGTGGATTG CGCATACTTT GTGAACAGAA AGTGATAGCG  
9721 TTGATGATTC TTCATTGGTC AGAAAATTAT GAACGGTTTC TTCTATTTTG TCTCTATATA  
9781 CTACGTATAG GAAATGTTTA CATTTTCGTA TTGTTTTCGA TTCACTCTAT GAATAGTTCT  
9841 TACTACAATT TTTTTGTCTA AAGAGTAATA CTAGAGATAA ACATAAAAAA TGTAGAGGTC  
9901 GAGTTTAGAT GCAAGTTCAA GGAGCGAAAG GTGGATGGGT AGGTTATATA GGGATATAGC  
9961 ACAGAGATAT ATAGCAAAGA GATACTTTTG AGCAATGTTT GTGGAAGCGG TATTCGCAAT  
10021 GGAAGCTCC ACCCCGGTTG ATAATCAGAA AAGCCCCAAA AACAGGAAGA TTGTATAAGC  
10081 AAATATTTAA ATTGTAAACG TTAATATTTT GTTAAAAATC GCGTTAAATT TTTGTTAAAT  
10141 CAGCTCATTT TTTAACGAAT AGCCCGAAAT CGGCAAAATC CCTTATAAAT CAAAAGAATA  
10201 GACCGAGATA GGGTTGAGTG TTGTTCCAGT TTCCAACAAG AGTCCACTAT TAAAGAACGT  
10261 GGACTCCAAC GTCAAAGGGC GAAAAAGGGT CTATCAGGGC GATGGCCCAC TACGTGAACC  
10321 ATCACCTTAA TCAAGTTTTT TGGGGTCGAG GTGCCGTAAA GCAGTAAATC GGAAGGGTAA  
10381 ACGGATGCC CCATTTAGAG CTTGACGGGG AAAGCCGGCG AACGTGGCGA GAAAGGAAGG  
10441 GAAGAAAGCG AAAGGAGCGG GGGCTAGGGC GGTGGGAAGT GTAGGGGTCA CGCTGGGCGT  
10501 AACCACCACA CCCGCCGCGC TTAATGGGGC GCTACAGGGC GCGTGGGGAT GATCCACTAG  
10561 T

//

LOCUS pNB2242 6808 bp DNA circular 15-JUN-2012

FEATURES Location/Qualifiers  
misc\_feature 2090..2663  
/note="pUC origin"  
misc\_feature complement(2808..3668)  
/note="Amp Resistance Gene"  
misc\_feature complement(3686..4793)  
/note="URA3 gene"  
misc\_feature 4797..6268  
/note="2 micron origin"  
misc\_feature complement(6336..6791)  
/note="f1 origin"  
misc\_feature 394..399  
/note="transcription start site"  
misc\_feature 1..451  
/note="GAL1"  
misc\_feature 513..522  
/note="translation intiation sequeence"  
misc\_feature 523..1143  
/note="Capsid"  
CDS 523..1143  
/note=""  
/translation="MSFMDQIPGGGNYPKLPVECLPNFPIQPSLTFRGRNDSHKLKNF  
ISEIMLNMSMISWPNDASRIVYCRRLNPAQWANDFVQEQGILEITFDTFIQGLYQ  
HFYKPPDINKIFNAITQLSEAKLGIERLNQFRKIWDRMPPDFMTEKAAIMTYTRLLT  
KETYNIVRMHKPETLKDAMEEAYQTTALTERFFPGFELDADGDITIG"  
misc\_feature 1144..1221  
/note=""  
CDS 1144..1221  
/note=""  
/translation="ATTHLQEEYDSYDSEDNLTQNGYVH"  
misc\_feature 1222..1395  
/note="Nucleocapsid"  
CDS 1222..1395  
/note=""  
/translation="TVRTRRSYNKPMNSHRNRNRRNNPSREECIKNRLCFYCKKEGHRL  
NECRARKASSNRS"  
misc\_feature 1560..1807  
/note="CYC terminator"  
misc\_feature 1727..1733  
/note="transcription end"  
misc\_feature 1401..1466  
/note="MS2"  
source 1..6808  
/dnas\_title="pNB2242"

ORIGIN

1 ACGGATTAGA AGCCGCCGAG CGGGTGACAG CCCTCCGAAG GAAGACTCTC CTCGGTGCCT  
61 CCTCGTCTTC ACCGGTCGCG TTCCTGAAAC GCAGATGTGC CTCGCGCCGC ACTGCTCCGA  
121 ACAATAAAGA TTCTACAATA CTAGCTTTTA TGGTTATGAA GAGGAAAAAT TGGCAGTAAC  
181 CTGGCCCCAC AAACCTTCAA ATGAACGAAT CAAATTAACA ACCATAGGAT GATAATGCGA  
241 TTAGTTTTTT AGCCTTATTT CTGGGGTAAT TAATCAGCGA AGCGATGATT TTTGATCTAT  
301 TAACAGATAT ATAAATGCAA AAACCTGCATA ACCACTTTAA CTAATACTTT CAACATTTTC  
361 GGTGGTGTATT ACTTCTTATT CAAATGTAAT AAAAGTATCA ACAAAAAATT GTTAATATAC  
421 CTCTATACTT TAACGTCAAG GAGAAAAAAC CCCGGATCGG ACTACTAGCA GCTGTAATAC  
481 GACTCACTAT AGGGAATATT AAGCTTGTA CCACACCCCA GTATGAGCTT TATGGATCAA

541 ATCCCAGGAG GAGGAAATTA TCCAAAACCTC CCAGTAGAAT GCCTTCCTAA CTTCCCGATC  
601 CAACCATCTT TGACCTTCAG AGGTAGAAAT GACTCGCATA AACTGAAAAA CTTTATCTCC  
661 GAAATAATGT TAAACATGTC TATGATATCT TGGCCGAATG ATGCCAGTCG TATTGTGTAC  
721 TGCAGAAGAC ATTTATTAAA CCCCCTGCT CAGTGGGCTA ATGACTTTGT ACAAGAACAA  
781 GGTATACTTG AAATAACATT CGACACATTC ATACAAGGAT TATATCAGCA TTTCTATAAG  
841 CCACCAGATA TCAATAAAAAT CTTTAATGCA ATCACGCAAC TTTCCGAAGC TAAACTTGGT  
901 ATTGAGCGTC TCAACCAACG ATTCAGAAAG ATTTGGGACA GAATGCCACC AGACTTCATG  
961 ACCGAAAAAG CTGCCATAAT GACATATACT AGGCTATGTA CAAAGGAAAC CTATAATATT  
1021 GTCAGAATGC ACAAACCAGA GACATTAATA GACGCCATGG AAGAGGCTTA CCAGACAACCT  
1081 GCACTAACTG AAAGATTCTT CCCAGGATTC GAACTTGATG CTGATGGAGA CACTATCATC  
1141 GGTGCCACAA CCCACTTACA AGAAGAATAC GACTCTGACT ATGATTCAGA AGATAATCTG  
1201 ACCCAGAATG GATACGTCCA TACCCTAAGG ACAAGAAGAT CTTACAATAA ACCAATGTCA  
1261 AATCATCGAA ACAGGAGAAA TAACAACCCA TCTAGAGAAG AATGTATAAA AAATCGGCTA  
1321 TGCTTCTATT GTAAGAAAAG GGGACATCGC CTGAACGAAT GTAGAGCACG TAAGGCGAGT  
1381 TCTAACCGAT CTTGACCCGG CTGAACATGA GGATCACCCA TGTCTGCGGT CGACTCTAGA  
1441 AACATGAGGA TCACCCATGT CCGGGAGCTC GGATCCACTA GTAACGGCCG CCAGTGTGCT  
1501 GGAATTCCTG AGATATCCAT CACACTGGCG GCCGCTCGAG CATGCATCTA GAGGGCCGCA  
1561 TCAATGTAAT AGTTATGTCA CGCTTACATT CACGCCCTCC CCCACATCC GCTCTAACCG  
1621 AAAAGGAAGG AGTTAGACAA CCTGAAGTCT AGTCCCCTAT TTATTTTTTT ATAGTATGT  
1681 TAGTATTAAG AACGTTATTT ATATTTCAA TTTTCTTTT TTTTCTGTAC AGACGCGTGT  
1741 ACGCATGTAA CATTATACTG AAAACCTTGC TTGAGAAGGT TTTGGGACGC TCGAAGCCTT  
1801 TAATTTGCGG CCCTGCATTA ATGAATCGGC CAACGCGCGG GGAGAGGCGG TTTGCGTATT  
1861 GGGCGCTCTT CCGCTTCCTC GCTCACTGAC TCGCTGCGCT CGGTCGTTTC GCTGCGGCGA  
1921 GCGGTATCAG CTCACTCAAA GCGGGTAATA CGGTTATCCA CAGAATCAGG GGATAACGCA  
1981 GGAAAGAACA TGTGAGCAAA AGGCCAGCAA AAGCCCAGGA ACCGTAAAAA GGCCGCGTTG  
2041 CTGGCGTTTT TCCATAGGCT CCGCCCCCT GACGAGCATC ACAAATTCG ACGCTCAAGT  
2101 CAGAGGTGGC GAAACCCGAC AGGACTATAA AGATAACCAG CGTTTTCCCC TGGAAGCTCC  
2161 CTCGTGCGCT CTCCTGTTCC GACCCTGCCG CTTACCGGAT ACCTGTCCGC CTTTCTCCCT  
2221 TCGGGAAGCG TGGCGCTTTC TCATAGCTCA CGCTGTAGGT ATCTCAGTTC GGTGTAGGTC  
2281 GTTCGCTCCA AGCTGGGCTG TGTGCACGAA CCCCCGTTT AGCCCGACCG CTGCGCCTTA  
2341 TCCGGTAACT ATCGTCTTGA GTCCAACCCG GTAAGACACG ACTTATCGCC ACTGGCAGCA  
2401 GCCACTGGTA ACAGGATTAG CAGAGCGAGG TATGTAGGCG GTGCTACAGA GTTCTTGAAG  
2461 TGGTGGCCTA ACTACGGCTA CACTAGAAGG ACAGTATTTG GTATCTGCGC TCTGCTGAAG  
2521 CCAGTTACCT TCGGAAAAAG AGTTGGTAGC TCTTGATCCG GCAAACAAAC CACCGCTGGT  
2581 AGCGGTGGTT TTTTTGTTTG CAAGCAGCAG ATTACGCGCA GAAAAAAGG ATCTCAAGAA  
2641 GATCCTTTGA TCTTTTCTAC GGGGTCTGAC GCTCAGTGA ACGAAAACCTC ACGTTAAGGG  
2701 ATTTTGGTCA TGAGATTATC AAAAAGGATC TTCACCTAGA TCCTTTTAAA TTAAAAATGA  
2761 AGTTTTAAAT CAATCTAAAAG TATATATGAG TAAACTTGGT CTGACAGTTA CCAATGCTTA  
2821 ATCAGTGAGG CACCTATCTC AGCGATCTGT CTATTTCTGTT CATCCATAGT TGCTGACTC  
2881 CCCGTCTGTG AGATAACTAC GATACGGGAG CGCTTACCAT CTGGCCCCAG TGCTGCAATG  
2941 ATACCGCGAG ACCCACGCTC ACCGGCTCCA GATTTATCAG CAATAAACCA GCCAGCCGGA  
3001 AGGGCCGAGC GCAGAAGTGG TCCTGCAACT TTATCCGCC T CATTACAGTC TATTAATTGT  
3061 TGCCGGGAAG CTAGAGTAAG TAGTTCGCCA GTTAATAGTT TGCGCAACGT TGTGGCATT  
3121 GCTACAGGCA TCGTGGTGTG ACTCTCGTCG TTTGGTATGG CTTTATTACG CTCCGGTTCC  
3181 CAACGATCAA GGCGAGTTAC ATGATCCCC ATGTTGTGCA AAAAAGCGGT TAGCTCCTTC  
3241 GGTCTCCGA TCGTTGTCAG AAGTAAGTTG GCCGCAGTGT TATCACTCAT GGTATGGCA  
3301 GCACTGCATA ATTCTCTTAC TGTCATGCCA TCCGTAAGAT GCTTTTCTGT GACTGGTGGC  
3361 TACTCAACCA AGTCATTCTG AGAATAGTGT ATGCCGCGAC CGAGTTCTGT TTGCCCGCGC  
3421 TCAATACGGG ATAATAGTGT ATCACATAGC AGAACTTTAA AAGTGCTCAT CATTGGAAAA  
3481 CGTTCCTTCG GGCGAAAACCT CTCAAGGATC TTACCGTGT TGAGATCCAG TTCGATGTAA  
3541 CCCACTCGTG CACCCAACCTG ATCTTCAGCA TCTTTTACTT TCACCAGCGT TTCTGGGTGA  
3601 GCAAAAACAG GAAGGCAAAA TGCCGCAAAA AAGGGAATAA GGGCGACACG GAAATGTTGA  
3661 ATACTCATA TCTTCCTTTT TCAATGGGTA ATAACCTGATA TAATTAATTT GAAGCTCTAA  
3721 TTTGTGAGTT TAGTATACAT GCATTTACTT ATAATACAGT TTTTGTAGTT TGCTGGCCGC  
3781 ATCTTCTCAA ATATGCTTCC CAGCCTGCTT TTCTGTAACG TTCACCCTCT ACCTTAGCAT

3841 CCCTTCCCTT TGCAAATAGT CCTCTTCCAA CAATAATAAT GTCAGATCCT GTAGAGACCA  
3901 CATCATCCAC GGTTCTATAC TGTTGACCCA ATGCGTCTCC CTTGTCATCT AAACCCACAC  
3961 CGGGTGT CAT AATCAACCAA TCGTAACCTT CATCTCTTCC ACCCATGTCT CTTTGAGCAA  
4021 TAAAGCCGAT AACAAAATCT TTGTGCGTCT TCGCAATGTC AACAGTACCC TTAGTATATT  
4081 CTCCAGTAGA TAGGGAGCCC TTGCATGACA ATTCTGCTAA CATCAAAAGG CCTCTAGGTT  
4141 CCTTTGTTAC TTCTTCTGCC GCCTGCTTCA AACCGCTAAC AATACCTGGG CCCACCACAC  
4201 CGTGTGCATT CGTAATGTCT GCCCATTCTG CTATTCTGTA TACACCCGCA GAGTACTGCA  
4261 ATTTGACTGT ATTACCAATG TCAGCAAATT TTCTGTCTTC GAAGAGTAAA AAATTGTACT  
4321 TGGCGGATAA TGCCCTTTAGC GGCTTAACTG TGCCCTCCAT GGAAAAATCA GTCAAGATAT  
4381 CCACATGTGT TTTTAGTAAA CAAATTTTGG GACCTAATGC TTCAACTAAC TCCAGTAATT  
4441 CCTTGGTGGT ACGAACATCC AATGAAGCAC ACAAGTTTGT TTGCTTTTCG TGCATGATAT  
4501 TAAATAGCTT GGCAGCAACA GGACTAGGAT GAGTAGCAGC ACGTTCCTTA TATGTAGCTT  
4561 TCGACATGAT TTATCTTCGT TTCCTGCAGG TTTTGTCTCT GTGCAGTTGG GTTAAAGAATA  
4621 CTGGGCAATT TCATGTTTCT TCAACACTAC ATATGCGTAT ATATACCAAT CTAAGTCTGT  
4681 GCTCCTTCCT TCGTTCCTCC TTCTGTTCGG AGATTACCGA ATCAAAAAAA TTTCAAAGAA  
4741 ACCGAAATCA AAAAAAAGAA TAAAAAATAA ATGATGAATT GAATTGAAAA GCTAGCTTAT  
4801 CGATGATAAG CTGTCAAAGA TGAGAATTAA TTCCACGGAC TATAGACTAT ACTAGATACT  
4861 CCGTCTACTG TACGATACAC TTCCGCTCAG GTCCTTGTC TTTAACGAGG CCTTACCCT  
4921 CTTTTGTTAC TCTATTGATC CAGCTCAGCA AAGGCAGTGT GATCTAAGAT TCTACTTTCG  
4981 CGATGTAGTA AAACCTAGCTA GACCGAGAAA GAGACTAGAA ATGCAAAAGG CACTTCTACA  
5041 ATGGCTGCCA TCATTATTAT CCGATGTGAC GCTGCAGCTT CTCAATGATA TTCGAATACG  
5101 CTTTGAGGAG ATACAGCCTA ATATCCGACA AACTGTTTTA CAGATTTACG ATCGTACTTG  
5161 TTACCCATCA TTGAATTTTG AACATCCGAA CCTGGGAGTT TTCCCTGAAA CAGATAGTAT  
5221 ATTTGAACCT GTATAATAAT ATATAGTCTA GCGCTTTACG GAAGACAATG TATGTATTTT  
5281 GGTTCCTGGA GAAACTATTG CATCTATTGC ATAGGTAATC TTGCACGTCG CATCCCCGGT  
5341 TCATTTTCTG CGTTTCCATC TTGCACCTCA ATAGCATATC TTTGTTAACG AAGCATCTGT  
5401 GCTTCATTTT GTAGAACAAA AATGCAACGC GAGAGCGCTA ATTTTTTCAA CAAAGAATCT  
5461 GAGCTGCATT TTTACAGAAC AGAAATGCAA CGCGAAAGCG CTATTTTACC AACGAAGAAT  
5521 CTGTGCTTCA TTTTTGTAAA AAAAAAATGC AACGCGACGA GAGCGCTAAT TTTTCAAACA  
5581 AAGAATCTGA GCTGCATTTT TACAGAACAG AAATGCAACG CGAGAGCGCT ATTTTACCAA  
5641 CAAAGAATCT ATACTTCTTT TTTGTTCTAC AAAAATGCAT CCCGAGAGCG CTATTTTCT  
5701 AACAAAGCAT CTTAGATTAC TTTTTTTCTC CTTTGTGCGC TCTATAATGC AGTCTCTTGA  
5761 TAACTTTTTG CACTGTAGGT CCGTTAAGGT TAGAAGAAGG CTACTTTGGT GTCTATTTT  
5821 TCTTCCATAA AAAAAGCCTG ACTCCACTTC CCGCGTTTAC TGATTACTAG CGAAGCTGCG  
5881 GGTGCATTTT TTCAAGATAA AGGCATCCCC GATTATATTC TATACCGATG TGGATTGCGC  
5941 ATACTTTGTG AACAGAAAGT GATAGCGTTG ATGATTCTTC ATTGGTCAGA AAATTATGAA  
6001 CGGTTTCTTC TATTTTGTCT CTATATACTA CGTATAGGAA ATGTTTACAT TTTCTGATTG  
6061 TTTTCGATTC ACTCTATGAA TAGTTCTTAC TACAATTTTT TTGTCTAAAG AGTAATACTA  
6121 GAGATAAACA TAAAAAATGT AGAGGTGCGAG TTTAGATGCA AGTTCAAGGA GCGAAAGGTG  
6181 GATGGGTAGG TTATATAGGG ATATAGCACA GAGATATATA GCAAAGAGAT ACTTTTGAGC  
6241 AATGTTTGTG GAAGCGGTAT TCGCAATGGG AAGCTCCACC CCGGTTGATA ATCAGAAAAG  
6301 CCCCAAAAAC AGGAAGATTG TATAAGCAAA TATTTAAATT GTAAACGTTA ATATTTTGT  
6361 AAAATTCGCG TTAAATTTTT GTTAAATCAG CTCATTTTTT AACGAATAGC CCGAAATCGG  
6421 CAAAATCCCT TATAAATCAA AAGAATAGAC CGAGATAGGG TTGAGTGTTG TTCCAGTTT  
6481 CAACAAGAGT CCACTATTAA AGAACGTGGA CTCCAACGTC AAAGGGCGAA AAAGGGTCTA  
6541 TCAGGGCGAT GGCCCACTAC GTGAACCATC ACCCTAATCA AGTTTTTTGG GGTGAGGTG  
6601 CCGTAAAGCA GTAAATCGGA AGGGTAAACG GATGCCCCCA TTTAGAGCTT GACGGGGAAA  
6661 GCCGGCGAAC GTGGCGAGAA AGGAAGGGAA GAAAGCGAAA GGAGCGGGG CTAGGGCGGT  
6721 GGAAGTGTA GGGGTCACGC TGGGCGTAAC CACCACACCC GCCGCGCTTA ATGGGGCGCT  
6781 ACAGGGCGCG TGGGGATGAT CCACTAGT

//

LOCUS pNB2247 11923 bp DNA linear 15-JUN-2012

FEATURES Location/Qualifiers  
misc\_feature 1..297  
/note="Gal10"  
misc\_feature 393..492  
/note="Partial U3"  
misc\_feature 493..503  
/note="start of transcription "  
misc\_feature 493..543  
/note="R"  
misc\_feature 544..610  
/note="U5"  
misc\_feature 692..3766  
/note="LacZ"  
misc\_feature 613..620  
/note="5' PBS"  
misc\_feature 3773..3818  
/note="U3"  
misc\_feature 3773..3818  
/note="POL3"  
misc\_feature 3995..4045  
/note="R"  
CDS 4036..4038  
/note=""  
/translation="N"  
CDS 4010..4013  
/note=""  
/translation="E"  
CDS 4043..4045  
/note=""  
/translation="Y"  
CDS 4024..4026  
/note=""  
/translation="N"  
misc\_feature 4046..4112  
/note="U5"  
misc\_feature 3930..3943  
/note="3' PBSA"  
misc\_feature 3948..3957  
/note="3' PBSB"  
misc\_feature 3822..3994  
/note="U3"  
source 1..11923  
/dnas\_title="pNB2247"

ORIGIN

1 GATCAAAAAT CATCGCTTCG CTGATTAATT ACCCCAGAAA TAAGGCTAAA AACTAATCG  
61 CATTATCATC CTATGGTTGT TAATTTGATT CGTTCATTTG AAGGTTTGTG GGGCCAGGTT  
121 ACTGCCAATT TTTCCCTCTC ATAACCATAA AAGCTAGTAT TGTAGAATCT TTATTGTTTCG  
181 GAGCAGTGCG GCGCGAGGCA CATCTGCGTT TCAGGAACGC GACCGGTGAA GACGAGGACG  
241 CACGGAGGAG AGTCTTCCTT CGGAGGGCTG TCACCCGCTC GGCGGCTTCT AATCCGTA  
301 TCAATATAGC AATGAGCAGT TAAGCGTATT ACTGAAAGTT CCAAAGAGAA GGTTTTTTTA  
361 GGCTAAXXXX XXCTCGACTC TAGAGGATCC CCCTGAACTA CCCAAAGTAT AAATGCCTGA  
421 ACAATTAGTT TAGATCCGAG ATTCCGCGCT TCCACCACTT AGTATGATTC ATATTTTATA  
481 TAATATATAA GATAAGTAAC ATTCCGTGAA TTAATCTGAT AACTGTTTT GACAACGGT  
541 TACTTCCCTA AGACTGTTTA TATTAGGATT GTCAAGACAC TCCGGTATTA CTCGAGCCCC

601 TAATACAACA CCTGGTAGCG TTAAAGGTTA CTAATTGTTC AAACGAACCA TCGAAAAGCC  
661 GAACCTAGCT ACACCACACC CCAGTGGTAC CATGACCATG ATTACGGATT CACTGGCCGT  
721 CGTTTTACAA CGTCGTGACT GGGAAAACCC TGGCGTTACC CAACTTAATC GCCTTGCAGC  
781 ACATCCCCCT TTCGCCAGCT GGCCTAATAG CGAAGAGGCC CGCACCGATC GCCCTTCCCA  
841 ACAGTTGCGC AGCCTGAATG GCGAATGGCG CTTTGCCTGG TTTCCGGCAC CAGAAGCGGT  
901 GCCGAAAGC TGGCTGGAGT GCGATCTTCC TGAGGCCGAT ACTGTCGTCG TCCCTCAAAA  
961 CTGGCAGATG CACGGTACG ATGCGCCAT CTACACCAAC GTGACCTATC CCATTACGGT  
1021 CAATCCGCCG TTTGTTCCCA CGGAGAATCC GACGGGTGT TACTCGCTCA CATTTAATGT  
1081 TGATGAAAGC TGGCTACAGG AAGGCCAGAC GCGAATTATT TTTGATGGCG TTAACTCGGC  
1141 GTTTCATCTG TGGTGCAACG GGCGCTGGGT CGGTTACGGC CAGGACAGTC GTTTGCCGTC  
1201 TGAATTTGAC CTGAGCGCAT TTTTACGCGC CGGAGAAAAC CGCCTCGCGG TGATGGTGCT  
1261 GCGCTGGAGT GACGGCAGTT ATCTGGAAGA TCAGGATATG TGGCGGATGA GCGGCATTTT  
1321 CCGTGACGTC TCGTTGCTGC ATAAACCGAC TACACAAATC AGCGATTTCC ATGTTGCCAC  
1381 TCGCTTTAAT GATGATTTCA GCCGCGCTGT ACTGGAGGCT GAAGTTCAGA TGTGCGGCCA  
1441 GTTGCCTGAC TACCTACGGG TAACAGTTTC TTTATGGCAG GGTGAAACGC AGGTCCGCGC  
1501 CGGCACCGCG CTTTTCGGCG GTGAAATTAT CGATGAGCGT GGTGGTTATG CCGATCGCGT  
1561 CACACTACGT CTGAACGTCG AAAACCCGAA ACTGTGGAGC GCCGAAATCC CGAATCTCTA  
1621 TCGTGCCTGAC GTTGAACGTC ACACCCGCGA CGGCACGCTG ATTGAAGACG AAGCCTGCGA  
1681 TGTGCGTTTC CGCGAGGTGC GCGATTGAAA GGCTCTGCTG CTGCTGAACG GCAAGCCGTT  
1741 GCTGATTCGA GCGGTTAACC GTCACGAGCA TCATCCTCTG CATGGTCAGG TCATGGATGA  
1801 GCAGACGATG GTGCAGGATA TCCTGCTGAT GAAGCAGAAC AACTTTAACG CCGTGCCTG  
1861 TTCGATTAT CCGAACCATC CGCTGTGGTA CACGCTGTGC GACCGCTACG GCCTGTATGT  
1921 GGTGGATGAA GCCAATATTG AAACCCACGG CATGGTGCCA ATGAATCGTC TGACCGATGA  
1981 TCCGCGCTGG CTACCGGCGA TGAGCGAACG CGTAACGCGA ATGGTGCAGC GCGATCGTAA  
2041 TCACCCGAGT GTGATCATCT GGTCGCTGGG GAATGAATCA GGCCACGGCG CTAATCACGA  
2101 CGCGCTGTAT CGCTGGATCA AATCTGTCGA TCCTTCCCGC CCGGTGCAGT ATGAAGGCGG  
2161 CGGAGCCGAC ACCACGGCCA CCGATATTAT TTGCCCGATG TACGCGCGCG TGGATGAAGA  
2221 CCAGCCCTTC CCGGCTGTGC CGAAATGGTC CATCAAAAAA TGGCTTTTCG TACCTGGAGA  
2281 GACGCGCCCG CTGATCCTTT GCGAATACGC CCACGCGATG GGTAACAGTC TTGGCGGTTT  
2341 CGCTAAATAC TGGCAGGCGT TTCGTCAGTA TCCCCGTTTA CAGGGCGGCT TCGTCTGGGA  
2401 CTGGGTGGAT CAGTCGCTGA TTAAATATGA TGAAAACGGC AACCCGTGGT CCGCTTACGG  
2461 CGGTGATTTT GCGGATACGC CGAACGATCG CCAGTCTGT ATGAACGGTC TGGTCTTTGC  
2521 CGACCGCACG CCGCATCCAG CGCTGACGGA AGCAAAACAC CAGCAGCAGT TTTTCCAGTT  
2581 CCGTTTATCC GGGCAAACCA TCGAAGTGAC CAGCGAATAC CTGTTCCGTC ATAGCGATAA  
2641 CGAGCTCCTG CACTGGATGG TGGCGCTGGA TGGAAGCCG CTGGCAAGCG GTGAAGTGCC  
2701 TCTGGATGTC GCTCCACAAG GTAAACAGTT GATTGAACTG CCTGAACTAC CGCAGCCGGA  
2761 GAGCGCCGGG CAACTCTGGC TCACAGTACG CGTAGTGCAA CCGAACGCGA CCGCATGGTC  
2821 AGAAGCCGGG CACATCAGCG CTTGGCAGCA GTGGCGTCTG GCGGAAAACC TCAGTGTGAC  
2881 GCTCCCCGCC GCGTCCCACG CCATCCCGCA TCTGACCACC AGCGAAATGG ATTTTTGCAT  
2941 CGAGCTGGGT AATAAGCGTT GGCAATTTAA CCGCCAGTCA GGCTTTCTTT CACAGATGTG  
3001 GATTGGCGAT AAAAAACAAC TGCTGACGCC GCTGCGCGAT CAGTTCACCC GTGCACCGCT  
3061 GGATAACGAC ATTTGGCGTAA GTGAAGCGAC CCGCATTGAC CCTAACGCCT GGGTCGAACG  
3121 CTGGAAGGCG GCGGGCCATT ACCAGGCCGA AGCAGCGTTG TTGCAGTGCA CGGCAGATAC  
3181 ACTTGCTGAT GCGGTGCTGA TTACGACCGC TCACGCGTGG CAGCATCAGG GGAAAACCTT  
3241 ATTTATCAGC CGGAAAACCT ACCGGATTGA TGGTAGTGGT CAAATGGCGA TTACCGTTGA  
3301 TGTGAAGTG GCGAGCGATA CACCGCATCC GCGCGGAT TGGCTGAACT GCCAGCTGGC  
3361 GCAGGTAGCA GAGCGGGTAA ACTGGCTCGG ATTAGGGCCG CAAGAAAAT ATCCCAGCG  
3421 CCTTACTGCC GCCTGTTTTG ACCCTGGGA TCTGCCATTG TCAGCATGT ATACCCGTA  
3481 CGTCTTCCCG AGCGAAAACG GTCTGCGCTG CGGGACGCGC GAATTGAATT ATGGCCACA  
3541 CCAGTGGCGC GGCGACTTCC AGTTCAACAT CAGCCGCTAC AGTCAACAGC AACTGATGGA  
3601 AACCAGCCAT CGCCATCTGC TGCACGCGGA AGAAGGCACA TGGCTGAATA TCGACGGTTT  
3661 CCATATGGGG ATTTGGTGGCG ACGACTCCTG GAGCCCGTCA GTATCGGCGG AATTCCAGCT  
3721 GAGCGCCGGT CGCTACCATT ACCAGTTGGT CTGGTGTC AAATAAGAGC TCTGTTGTAT  
3781 CTCAAAATGA GATATGTCAG TATGACAATA CGTCACCCGG GACGTTTATA AAACACATAT  
3841 GAAACAACCT TATAACAAAA CGAACAACAT GAGACAAAAC CCGACCTTCC CTAGCTGAAC

3901 TACCCAAAGT ATAAATGCCT GAACAATTAG TTTAGATCCG AGATTCCGCG CTTCACCAC  
3961 TTAGTATGAT TCATATTTTA TATAATATAT AAGATAAGTA ACATTCCGTG AATTAATCTG  
4021 ATAAACTGTT TTGACAACCTG GTTACTTCCC TAAGACTGTT TATATTAGGA TTGTCAAGAC  
4081 ACTCCGGTAT TACTCGAGCC CGTAATACAA CAGAAAGTTC CATTTTGGAT GCTCTATTTA  
4141 TGGGAATATG ACTATACGAA TGTCACCCAC GATGGCCGGA GTAGCTGTGA TGAGCATCTT  
4201 TTTGTCTGGG CGGCTTAAAA CGTGAGCAAA ATTGTACTGT AAATTACTTA CGNNNNNNNN  
4261 NNNNNNNNNN NNNNNNNNNN NNNNNNNNNN NNNNNNNNNN NNNNNNNNNN NNNNNNNNNN  
4321 NNNNNNNNNN NNNNNNNNNN NNNNNNNNNN NNNNNNNNNN NNNNNNNNNN NNNNNNNNNN  
4381 NNNNNNNNNN NNNNNNNNNN NNNNNNNNNN NNNNNNNNNN NNNNNNNNNN NNNNNNNNNN  
4441 NNNNNNNNNN NNNNNNNNNN NNNNNNNNNN NNNNNNNNNN NNNNNNNNNN NNNNNNNNNN  
4501 NNNNNNNNNN NNNNNNNNNN NNNNNNNNNN NNNNNNNNNN NNNNNNNNNN NNNNNNNNNN  
4561 NNNNNNNNNN NNNNNNNNNN NNNNNNNNNN NNNNNNNNNN NNNNNNNNNN NNNNNNNNNN  
4621 NNNNNNNNNN NGAATTCCAC GGACTATAGA CTATACTAGT ATACTCCGTC TACTGTACGA  
4681 TACACTTCCG CTCAGGTCC TGTCCCTTAA CGAGGCCTTA CCACTCTTTT GTTACTCTAT  
4741 TGATCCAGCT CAGCAAAGGC AGTGTGATCT AAGATTCTAT CTTCGCGATG TAGTAAAAC  
4801 AGCTAGACCG AGAAAGAGAC TAGAAATGCA AAAGGCACTT CTACAATGGC TGCCATCATT  
4861 ATTATCCGAT GTGACGCTGC AGCTTCTCAA TGATATTCGA ATACGCTTTG AGGAGATACA  
4921 GCCTAATATC CGACAAACTG TTTTACAGT TTACGATCGT ACTTGTTACC CATCATTGAA  
4981 TTTTGAACAT CCGAACCTGG GAGTTTTCCT TGAATACAGT AGTATATTTG AACCTGATA  
5041 ATAATATATA GTCTAGCGCT TTACGGAAGA CAATGTATGT ATTTTCGGTTC CTGGAGAAC  
5101 TATTGCATCT ATTGCATAGG TAATCTTGCA CGTCGCATCC CCGGTTCAAT TTCTGCGTTT  
5161 CCATCTTGCA CTTCAATAGC ATATCTTTGT TAACGAAGCA TCTGTGCTTC ATTTTGTAGA  
5221 AAAAAAATGC AACCGGAGAG CGCTAATTTT TCAAACAAAG AATCTGAGCT GCATTTTTTAC  
5281 AGAACAGAAA TGCAACGCGA AAGCGCTATT TTACCAACGA AGAATCTGTG CTTCATTTTT  
5341 GTA AACAAA AATGCAACGC GAGAGCGCTA ATTTTTCAAA CAAAGAATCT GAGCTGCATT  
5401 TTTACAGAAC AGAAATGCAA CGCGAGAGCG CTATTTTACC AACAAAGAAT CTATACTTCT  
5461 TTTTTGTTCT AAAAAAATGC ATCCCAGAG CGCTATTTTT CTAACAAAGC ATCTTAGATT  
5521 ACTTTTTTTC TCCTTTGTGC GCTCTATAAT GCAGTCTCTT GATAACTTTT TGCACTGTAG  
5581 GTCCGTTAAG GTTAGAAGAA GGCTACTTTG GTGTCTATTT TCTCTTCCAT AAAAAAAGCC  
5641 TGACTCCACT TCCCGGTTT ACTGATTACT AGCGAAGCTG CCGGTGCATT TTTCAAGAT  
5701 AAAGGCATCC CCGATTATAT TCTATAACCGA TGTGGATTGC GCATACTTTG TGAACAGAAA  
5761 GTGATAGCGT TGATGATTCT TCATTGGTCA GAAAATTATG AACGGTTTCT TCTATTTTGT  
5821 CTCTATATAC TACGTATAGG AAATGTTTAC ATTTTCGTAT TGTTTTCGAT TCACTCTATG  
5881 AATAGTTCTT ACTACAATTT TTTTGTCTAA AGAGTAATAC TAGAGATAAA CATAAAAAAT  
5941 GTAGAGGTCG AGTTTAGATG CAAGTTCAAG GAGCGAAAGG TGGATGGGTA GGTATATATAG  
6001 GGATATAGCA CAGAGATATA TAGCAAAGAG ATACTTTTGA GCAATGTTTG TGGAAGCGGT  
6061 ATTCGCAATA TTTTAGTAGC TCGTTACAGT CCGGTGCGTT TTTGGTTTTT TGAAAGTGCG  
6121 TCTTCAGAGC GCTTTTGGTT TTCAAAGCG CTCTGAAGTT CCTATACTTT CTAGAGAATA  
6181 GGAACCTCGG AATAGGAAC TCAAAGCGTT TCCGAAAACG AGCGCTTCCG AAAATGCAAC  
6241 GCGAGCTGCG CACATACAGC TCACTGTTCA CGTCGCACCT ATATCTGCGT GTTGCCGTGA  
6301 TATATATATA CATGAGAAGA ACGGCATAGT GCGTGTATT GCTTAAATGC GTACTTATAT  
6361 GCGTCTATTT ATGTAGGATG AAAGGTAGTC TAGTACCTCC TGTGATATTA TCCCATTTCA  
6421 TGC GGGGTAT CGTATGCTTC CTTCAGCACT ACCCTTTAGC TGTTCTATAT GCTGCCACTC  
6481 CTCAATTGGA TTAGTCTCAT CCTTCAATGC TATCATTTCC TTTGATATTG GATCATATGC  
6541 ATAGTACCGA GAAACTAGTG CGAAGTAGTG ATCAGGTATT GCTGTTATCT GATGAGTATA  
6601 CGTTGTCTTG GCCACGGCAG AAGCACGCTT ATCGCTCAA TTTCCCACAA CATTAGTCAA  
6661 CTCCGTTAG CCCTTCATTG AAAGAAATGA GGTATCAAAA TGTCTTCAA TGTGAGATTT  
6721 TGGGCCATTT TTTATAGCAA AGATTGAATA AGGCGCATTT TTCTTCAAAG CTTATTGTA  
6781 CGACTGACT AAGTTATCTT TTAATAATTG GTATTCTGT TTATTGCTTG AAGAAATGCC  
6841 GGTCCATTTT ACTCGTTTTA GGACTGGTTC AGAATTCGGT CTCCCTATAG TGAGTCGTAT  
6901 TAATTTCGATA TCCGTAATCA TGGTCATAGC TGTTTCTGT GTGAAATTGT TATCCGCTCA  
6961 CAATTCCACA CAACATACGA GCCGGAAGCA TAAAGTGTA AGCCTGGGGT GCCTAATGAG  
7021 TGAGCTAACT CACATTAATT GCGTTGCGCT CACTGCCCGC TTTCCAGTCG GGAAACCTGT  
7081 CGTGCCAGCT GCATTAATGA ATCGGCCAAC GCGCGGGGAG AGGCGGTTTG CGTATTGGGC  
7141 GCTCTTCCGC TTCTTCGCTC ACTGACTCGC TGCGCTCGGT CGTTCGGCTG CCGCGAGCGG



7201 TATCAGCTCA CTCAAAGGCG GTAATACGGT TATCCACAGA ATCAGGGGAT AACGCAGGAA  
7261 AGAACATGTG AGCAAAAAGGC CAGCAAAAAGG CCAGGAACCG TAAAAAGGCC GCGTTGCTGG  
7321 CGTTTTTCCA TAGGCTCCGC CCCCTGACG AGCATCACAA AAATCGACGC TCAAGTCAGA  
7381 GGTGGCGAAA CCCGACAGGA CTATAAAGAT ACCAGGCGTT TCCCCCTGGA AGCTCCCTCG  
7441 TGCCTCTCC TGTTCCGACC CTGCCGCTTA CCGGATACCT GTCCGCCTTT CTCCCTTCGG  
7501 GAAGCGTGGC GCTTTCTCAT AGCTCACGCT GTAGGTATCT CAGTTCGGTG TAGGTCGTTT  
7561 GCTCCAAGCT GGGCTGTGTG CACGAACCC CCGTTCAGCC CGACCGCTGC GCCTTATCCG  
7621 GTAACATATCG TCTTGAGTCC AACCCGGTAA GACACGACTT ATCGCCACTG GCAGCAGCCA  
7681 CTGGTAACAG GATTAGCAGA GCGAGGTATG TAGGCGGTGC TACAGAGTTC TTGAAGTGGT  
7741 GGCCTAACTA CGGCTACACT AGAAGGACAG TATTTGGTAT CTGCGCTCTG CTGAAGCCAG  
7801 TTACCTTCGG AAAAAGAGTT GGTAGCTCTT GATCCGGCAA ACAAACCACC GCTGGTAGCG  
7861 GTGGTTTTTT TGTTTGCAAG CAGCAGATTA CGCGCAGAAA AAAAGGATCT CAAGAAGATC  
7921 CTTTGATCTT TTCTACGGGG TCTGACGCTC AGTGGAACGA AAACACAGT TAAGGGATTT  
7981 TGGTCATGAG ATTATCAAAA AGGATCTTCA CCTAGATCCT TTTAAATTA AAATGAAGTT  
8041 TTAATCAAT CTAAAGTATA TATGAGTAAA CTTGGTCTGA CAGTTACCAA TGCTTAATCA  
8101 GTGAGGCACC TATCTCAGCG ATCTGTCTAT TTCGTTTATC CATAGTTGCC TGACTCCCCG  
8161 TCGTGTAGAT AACTACGATA CGGGAGGGCT TACCATCTGG CCCAGTGTG GCAATGATAC  
8221 CGCGAGACCC ACGCTCACCG GCTCCAGATT TATCAGCAAT AAACCAGCCA GCCGGAAGGG  
8281 CCGAGCGCAG AAGTGGTCTT GCAACTTTAT CCGCCTCCAT CCAGTCTATT AATGTTGCC  
8341 GGAAGCTAG AGTAAGTAGT TCGCCAGTTA ATAGTTTGGC CAACGTTGTT GCCATTGCTA  
8401 CAGGCATCGT GGTGTCACGC TCGTCGTTTG GTATGGCTTC ATTCAGCTCC GGTCCCAAC  
8461 GATCAAGGCG AGTTACATGA TCCCCATGT TGTGCAAAAA AGCGGTTAGC TCCTTCGGTC  
8521 CTCCGATCGT TGTCAGAAGT AAGTTGGCCG CAGTGTATC ACTCATGGTT ATGGCAGCAC  
8581 TGCATAATCC TCTTACTGTC ATGCCATCCG TAAAGATGCTT TTCTGTGACT GGTGAGTACT  
8641 CAACCAAGTC ATTCTGAGAA TAGTGTATGC GCGGACCGAG TTGGTCTTGC CCGGCGTCAA  
8701 TACGGGATAA TACCGCGCCA CATAGCAGAA CTTTAAAAGT GCTCATCATT GGAAAACGTT  
8761 CTTGGGGGCG AAAACTCTCA AGGATCTTAC CGCTGTTTAG ATCCAGTTCG ATGTAACCCA  
8821 CTCGTGCACC CAACTGATCT TCAGCATCTT TTAATTTTAC CAGCGTTTCT GGGTGAGCAA  
8881 AAACAGGAAG GCAAAAATGCC GCAAAAAGG GAATAAGGGC GACACGGAAA TGTGAATAC  
8941 TCATACTCTT CCTTTTCAA TATTATTGAA GCATTTATCA GGGTTATTGT CTCATGAGCG  
9001 GATACATATT TGAATGTATT TAGAAAAATA AACAAATAGG GGTCCGCGC ACATTTCCCC  
9061 GAAAAGTGCC ACCTGACGTC TAAGAAACCA TTATTATCAT GACATTAACC TATAAAAATA  
9121 GCGTATCAC GAGGCCCTT CGTCTCGCGC GTTTCGGTGA TGACGGTGAA AACCTCTGAC  
9181 ACATGCAGCT CCCGGAGACG GTCACAGCTT GTCTGTAAGC GGATGCCGGG AGCAGACAAG  
9241 CCCGTCAGGG TGCGTCAGCG GGTGTTGGCG GGTGTCGGGG CTGGCTTAAC TATGCGGCAT  
9301 CAGAGCAGAT TGTAAGTAGA GTGCACCATA TGCGGTGTGA AATACCGCAC AGATGCGTAA  
9361 GGAGAAAATA CCGCATCAGG AANTTCCAGA CGATTGAGCG TCAAAATGTA GGTATTTCCA  
9421 TGAGCGTTTT TCCTGTTGCA ATGGCTGGCG GTAATATTGT TCTGGATATT ACCAGCAAGG  
9481 CCGATAGTTT GAGTCTTCT ACTCAGGCAA GTGATGTTAT TACTAATCAA AGAAGTATTG  
9541 CGACAACGGT TAATTTGCGT GATGGACAGA CTCTTTTACT CCGTGGCCTC ACTGATTATA  
9601 AAAACACTTC TCAGGATTTT GCGGTACCGT TCCTGTCTAA AATCCCTTTA ATCGGCCCTC  
9661 TGTTTAGCTC CCGCTCTGAT TCTAACGAGG AAAGCACGTT ATACGTGCTC GTCAAAGCAA  
9721 CCATAGTACG CGCCCTGTAG CCGCGCATTA AGCGCGGCGG GTGTGGTGGT TACGCGCAGC  
9781 GTGACCGCTA CACTTGCCAG CGCCCTAGCG CCCGCTCCTT TCGCTTTCTT CCCCTCCTTT  
9841 GTCGCCACGT TCGCCGGCTT TCCCCGTC AA GCTCTAAATC GGGGGCTCCC TTTAGGGTTC  
9901 CGATTTAGTG CTTTACGGCA CCTCGACCCC AAAAACTTG ATTAGGGTGA TGGTTCACGT  
9961 AGTGGGCCAT CGCCCTGATA GACGGTTTTT CGCCCTTGA CGTTGGAGTC CAGGTTCTTT  
10021 AATAGTGGAC TCTTGTCCA AACTGGAACA ACATCAACC CTATCTCGGT CTATCTTTT  
10081 GATTTATAAG GGATTTTGCC GATTTTCGCC TATTGGTTAA AAAATGAGCT GATTTAACA  
10141 AAATTTAACG CGAATTTTAA CAAAATATTA ACGTTTACAA TTTAAATATT TGCTTATACA  
10201 ATCTTCCTGT TTTTGGGGCT TTTCTGATTA TCAACCGGGG TACATATGAT TGACATGCTA  
10261 GTTTTACGAT TACCGTTCAT CGATTCTCTT GTTTGCTCCA GACTCTCAGG CAATGACCCTG  
10321 ATAGCCTTTG TAGACCTCTC AAAAATAGCT ACCCTCTCCG GCATGAATTT ATCAGCTAGA  
10381 ACGGTTGAAT ATCATATTGA TGGTGATTTG ACTGTCTCCG GCCTTTCTCA CCCGTTTGAA  
10441 TCTTTACCTA CACATTACTC AGGCATTGCA TTTAAAATAT ATGAGGGTTC TAAAAATTTT

10501 TATCCTTGCG TTGAAATAAA GGATTCTCCC GCAAAAAGTAT TACAGGGTCA TAATGTTTTT  
10561 GGTACAACCG ATTTAGCTTT ATGCTCTGAG GCTTTATTGC TTAATTTTGC TAATCCTTTG  
10621 CCTTGCCTGT ATGATTTATT GGATGTTGGA ANTTCCATTC GCCCTTCAGG CTGCGCAACT  
10681 GTTGGGAAGG GCGATCGGTG CGGGCCTCTT CGCTATTACG CCAGCTGGCG AAAGGGGGAT  
10741 GTGCTGCAAG GCGATTAAGT TGGGTAACGC CAGGGTTTTC CCAGTCACGA CGTTGTAAAA  
10801 CGACGGCCAG TGCCAAGCTT TTCAATTCAA TTCATCATTT TTTTTTTTATT CTTTTTTTTTG  
10861 ATTTCGGTTT CTTTGAAATT TTTTTGATTC GGTAATCTCC GAACAGAAGG AAGAACGAAG  
10921 GAAGGAGCAC AGACTTAGAT TGGTATATAT ACGCATATGT AGTGTTGAAG AAACATGAAA  
10981 TTGCCAGTA TTCTTAACCC AACTGCACAG AACAAAAACC TGCAGGAAAC GAAGATAAAT  
11041 CATGTCGAAA GCTACATATA AGGAACGTGC TGCTACTCAT CCTAGTCCTG TTGCTGCCAA  
11101 GCTATTTAAT ATCATGCACG AAAAGCAAAC AAAC TTGTGT GCTTCATTGG ATGTTCTGTAC  
11161 CACCAAGGAA TTACTGGAGT TAGTTGAAGC ATTAGGTCCC AAAATTTGTT TACTAAAAAC  
11221 ACATGTGGAT ATCTTGACTG ATTTTTCCAT GGAGGGCACA GTTAAGCCGC TAAAGGCATT  
11281 ATCCGCCAAG TACAATTTTT TACTCTTCGA AGACAGAAAA TTTGCTGACA TTGGTAATAC  
11341 AGTCAAATTG CAGTACTCTG CGGGTGTATA CAGAATAGCA GAATGGGCAG ACATTACGAA  
11401 TGCACACGGT GTGGTGGGCC CAGGTATTGT TAGCGGTTG AAGCAGGCGG CAGAAGAAGT  
11461 AACAAAGGAA CCTAGAGGCC TTTTGATGTT AGCAGAATTG TCATGCAAGG GCTCCCTATC  
11521 TACTGGAGAA TATACTAAGG GTACTGTTGA CATTGCGAAG AGCGACAAAG ATTTTGTAT  
11581 CGGCTTTATT GCTCAAAGAG ACATGGGTGG AAGAGATGAA GGTTACGATT GGTGATTAT  
11641 GACACCCGGT GTGGGTTTAG ATGACAAGGG AGACGCATTG GGTCAACAGT ATAGAACCCT  
11701 GGATGATGTG GTCTCTACAG GATCTGACAT TATTATTGTT GGAAGAGGAC TATTTGCAAA  
11761 GGGAAGGGAT GCTAAGGTAG AGGGTGAACG TTACAGAAAA GCAGGCTGGG AAGCATATTT  
11821 GAGAAGATGC GGCCAGCAAA ACTAAAAAAC TGTATTATAA GTAAATGCAT GTATACTAAA  
11881 CTCACAAATT AGAGCTTCAA TTTAATTATA TCAGTTATTA CCC

//

LOCUS pNB2259 8999 bp DNA linear 15-JUN-2012

FEATURES Location/Qualifiers  
misc\_feature 394..399  
/note="transcription start site"  
misc\_feature 1..451  
/note="GAL1"  
misc\_feature 513..3587  
/note="LacZ"  
misc\_feature 3599..3667  
/note="MS2 sequence"  
misc\_feature 3751..3998  
/note="CYC terminator"  
misc\_feature 3918..3924  
/note="transcription end"  
source 1..8999  
/dnas\_title="pNB2259"

ORIGIN

1 ACGGATTAGA AGCCGCCGAG CGGGTGACAG CCCTCCGAAG GAAGACTCTC CTCGGTGCCT  
61 CCTCGTCTTC ACCGGTCGCG TTCCTGAAAC GCAGATGTGC CTCGCGCCGC ACTGCTCCGA  
121 ACAATAAAGA TTCTACAATA CTAGCTTTTA TGGTTATGAA GAGGAAAAAT TGGCAGTAAC  
181 CTGGCCCCAC AAACCTTCAA ATGAACGAAT CAAATTAACA ACCATAGGAT GATAATGCGA  
241 TTAGTTTTTT AGCCTTATTT CTGGGGTAAT TAATCAGCGA AGCGATGATT TTTGATCTAT  
301 TAACAGATAT ATAAATGCAA AAACCTGCATA ACCACTTTAA CTAATACTTT CAACATTTTC  
361 GGTTCGTATT ACTTCTTATT CAAATGTAAT AAAAGTATCA AAAAAAATT GTTAATATAC  
421 CTCTATACTT TAACGTCAAG GAGAAAAAAC CCCGGATCGG ACTACTAGCA GCTGTAATAC  
481 GACTCACTAT AGGGAATATT AAGCTTGGTA CCATGACCAT GATTACGGAT TCACTGGCCG  
541 TCGTTTTACA ACGTCGTGAC TGGGAAAACC CTGGCGTTAC CCAACTTAAT CGCCTTGCAG  
601 CACATCCCCC TTTCCGCCAGC TGGCGTAATA GCGAAGAGGC CCGCACCGAT CGCCCTTCCC  
661 AACAGTTGCG CAGCCTGAAT GGCGAATGGC GCTTTGCCTG GTTTCGGCA CCAGAAGCGG  
721 TGCCGAAAG CTGGCTGGAG TGCGATCTTC CTGAGGCCGA TACTGTCGTC GTCCCTCAA  
781 ACTGGCAGAT GCACGGTTAC GATGCGCCA TCTACACCAA CGTGACCTAT CCCATTACGG  
841 TCAATCCGCC GTTTGTTCCC ACGGAGAATC CGACGGTTG TTACTIONGCTC ACATTTAATG  
901 TTGATGAAAG CTGGCTACAG GAAGGCCAGA CGCGAATTAT TTTTGATGGC GTTAACCGG  
961 CGTTTCATCT GTGGTGCAAC GGGCGCTGGG TCGGTACGG CCAGGACAGT CGTTTGCCGT  
1021 CTGAATTTGA CCTGAGCGCA TTTTACGCG CCGGAGAAA CCGCCTCGCG GTGATGGTGC  
1081 TGCGCTGGAG TGACGGCAGT TATCTGGAAG ATCAGGATAT GTGGCGGATG AGCGGCATTT  
1141 TCCGTGACGT CTCGTTGCTG CATAAACCGA CTACACAAAT CAGCGATTTT CATGTTGCCA  
1201 CTCGCTTTAA TGATGATTTT AGCCGCGCTG TACTGGAGGC TGAAGTTCAG ATGTGCGGCG  
1261 AGTTGCGTGA CTACCTACGG GTAACAGTTT CTTTATGGCA GGGTGAAACG CAGGTCGCCA  
1321 GCGGCACCGC GCCTTTCGGC GGTGAAATTA TCGATGAGCG TGGTGGTTAT GCCGATCGCG  
1381 TCACACTACG TCTGAACGTC GAAAACCCGA AACTGTGGAG CGCCGAAATC CCGAATCTCT  
1441 ATCGTGCGGT GGTGAACTG CACACCGCCG ACGGCACGCT GATTGAAGCA GAAGCCTGCG  
1501 ATGTCGGTTT CCGCGAGGTG CGGATTGAAA ATGGTCTGCT GCTGCTGAAC GGCAAGCCGT  
1561 TGCTGATTCG AGGCGTTAAC CGTCACGAGC ATCATCCTCT GCATGGTCAG GTCATGGATG  
1621 AGCAGACGAT GGTGCAGGAT ATCCTGCTGA TGAAGCAGAA CAACTTTAAC GCCGTGCGCT  
1681 GTTCGCATTA TCCGAACCAT CCGCTGTGGT ACACGCTGTG CGACCGCTAC GGCTGTATG  
1741 TGGTGGATGA AGCCAATATT GAAACCCACG GCATGGTGCC AATGAATCGT CTGACCGATG  
1801 ATCCGCGCTG GCTACCGGCG ATGAGCGAAC CCGTAACGCG AATGGTGCAG CGGATCGTA  
1861 ATCACCCGAG TGTGATCATC TGGTTCGCTGG GGAATGAATC AGGCCACGGC GCTAATCACG  
1921 ACGCGCTGTA TCGCTGGATC AAATCTGTCT ATCCTTCCC CGCGGTGCAG TATGAAGCGG  
1981 GCGGAGCCGA CACCACGGCC ACCGATATTA TTTGCCCGAT GTACGCGCGC GTGGATGAAG  
2041 ACCAGCCCTT CCCGGCTGTG CCGAAATGGT CCATCAAAAA ATGGCTTTCG CTACCTGGAG  
2101 AGACGCGCCC GCTGATCCTT TGCGAATACG CCCACGCGAT GGGTAACAGT CTTGGCGGTT  
2161 TCGCTAAATA CTGGCAGGCG TTTTCGTCAGT ATCCCCGTTT ACAGGGCGGC TTCGCTGGG  
2221 ACTGGGTGGA TCAGTCGCTG ATTAAATATG ATGAAAACGG CAACCCGTGG TCGGCTTACG

2281 GCGGTGATTT TGGCGATACG CCGAACGATC GCCAGTTCTG TATGAACGGT CTGGTCTTTG  
2341 CCGACCGCAC GCCGCATCCA GCGCTGACGG AAGCAAAACA CCAGCAGCAG TTTTCCAGT  
2401 TCCGTTTATC CGGGCAAACC ATCGAAGTGA CCAGCGAATA CCTGTTCCGT CATAGCGATA  
2461 ACGAGCTCCT GCACTGGATG GTGGCGCTGG ATGGTAAGCC GCTGGCAAGC GGTGAAGTGC  
2521 CTCTGGATGT CGCTCCACAA GGTAACAGT TGATTGAACT GCCTGAACTA CCGCAGCCGG  
2581 AGAGCGCCGG GCAACTCTGG CTCACAGTAC GCGTAGTGCA ACCGAACGCG ACCGCATGGT  
2641 CAGAAGCCGG GCACATCAGC GCCTGGCAGC AGTGGCGTCT GGCGGAAAAC CTCAGTGTGA  
2701 CGCTCCCCGC CGCGTCCCAC GCCATCCCGC ATCTGACCAC CAGCGAAATG GATTTTTGCA  
2761 TCGAGCTGGG TAATAAGCGT TGGCAATTTA ACCGCCAGTC AGGCTTTCTT TCACAGATGT  
2821 GGATTGGCGA TAAAAAACAA CTGCTGACGC CGCTGCGCGA TCAGTTCACC CGTGCACCGC  
2881 TGGATAACGA CATTGGCGTA AGTGAAGCGA CCCGCATTGA CCCTAACGCC TGGGTGCAAC  
2941 GCTGGAAGGC GGCGGGCCAT TACCAGGCCG AAGCAGCGTT GTTGCAGTGC ACGGCAGATA  
3001 CACTTGCTGA TGCGGTGCTG ATTACGACCG CTCACGCGTG GCAGCATCAG GGGAAAACCT  
3061 TATTTATCAG CCGGAAAACC TACCGGATTG ATGGTAGTGG TCAAATGGCG ATTACCGTTG  
3121 ATGTTGAAGT GGCGAGCGAT ACACCGCATC CGGCGCGGAT TGGCCTGAAC TGCCAGCTGG  
3181 CGCAGGTAGC AGAGCGGGTA AACTGGCTCG GATTAGGGCC GCAAGAAAAC TATCCCGACC  
3241 GCCTTACTGC CGCCTGTTTT GACCGCTGGG ATCTGCCATT GTCAGACATG TATACCCCGT  
3301 ACGTCTTCCC GAGCGAAAAC GGTCTGCGTG CCGGGACGCG CGAATTGAAT TATGGCCAC  
3361 ACCAGTGGCG CGGCGACTTC CAGTTCAACA TCAGCCGCTA CAGTCAACAG CACTGATGG  
3421 AAACCAGCCA TCGCCATCTG CTGCACGCGG AAGAAGGCAC ATGGCTGAAT ATCGAGGTT  
3481 TCCATATGGG GATTGGTGGC GACGACTCCT GGAGCCCGTC AGTATCGGCG GAATTCCAGC  
3541 TGAGCGCCGG TCGCTACCAT TACCAGTTGG TCTGGTGTC AAAATAACCG CGGCCCGGCT  
3601 GAACATGAGG ATCACCCATG TCTGCGGTCT ACTCTAGAAA CATGAGGATC ACCCATGTCC  
3661 GGGATCCACT AGTAACGGCC GCCAGTGTGC TGGAAATCTG CAGATATCCA TCACACTGGC  
3721 GGCCGCTCGA GCATGCATCT AGAGGGCCGC ATCATGTAAT TAGTTATGTC ACGCTTACAT  
3781 TCACGCCCTC CCCCCACATC CGCTCTAACC GAAAAGGAAG GAGTTAGACA ACCTGAAGTC  
3841 TAGGTCCCTA TTTATTTTTT TATAGTTATG TTAGTATTAA GAACGTTATT TATATTTCAA  
3901 ATTTTTCTTT TTTTTCTGTA CAGACGCGTG TACGCATGTA ACATTATACT GAAAACCTTG  
3961 CTTGAGAAGG TTTTGGGACG CTCGAAGGCT TTAATTTGCG GCCCTGCATT AATGAATCGG  
4021 CCAACGCGCG GGGAGAGGCG GTTTGCGTAT TGGGCGCTCT TCCGCTTCCCT CGCTCACTGA  
4081 CTCGCTGCGC TCGGTGTTTC GGCTGCGGCG AGCGGTATCA GCTCACTCAA AGGCGGTAAT  
4141 ACGGTTATCC ACAGAATCAG GGGATAACGC AGGAAAGAAC ATGTGAGCAA AAGGCCAGCA  
4201 AAAGCCAGG AACCGTAAAA AGGCCGCGTT GCTGGCGTTT TTCCATAGGC TCCGCCCCCC  
4261 TGACGAGCAT CACAAAAATC GACGCTCAAG TCAGAGGTGG CGAAACCCGA CAGGACTATA  
4321 AAGATACCAG GCGTTTCCCC CTGGAAGCTC CCTCGTGCGC TCTCCTGTTC CGACCCTGCC  
4381 GCTTACCGGA TACCTGTCCG CTTTTCTCCC TTCGGGAAGC GTGGCGCTTT CTCATAGCTC  
4441 ACGCTGTAGG TATCTCAGTT CGGTGTAGGT CGTTCGCTCC AAGCTGGGCT GTGTGCACGA  
4501 ACCCCCCGTT CAGCCCGACC GCTGCGCCTT ATCCGGTAAC TATCGTCTTG AGTCCAACCC  
4561 GGTAAGACAC GACTTATCGC CACTGGCAGC AGCCACTGGT AACAGGATTA GCAGAGCGAG  
4621 GTATGTAGGC GGTGCTACAG AGTTCCTGAA GTGGTGGCCT AACTACGGCT ACACTAGAAG  
4681 GACAGTATTT GGTATCTGCG CTCTGCTGAA GCCAGTTACC TTCGGAAAAA GAGTTGGTAG  
4741 CTCTTGATCC GGCAAAACAA CCACCGCTGG TAGCGGTGGT TTTTTTGTTT GCAAGCAGCA  
4801 GATTACGCGC AGAAAAAAG GATCTCAAGA AGATCCTTTG ATCTTTTCTA CGGGGTCTGA  
4861 CGCTCAGTGG AACGAAAACT CACGTTAAGG GATTTTGGTC ATGAGATTAT CAAAAAGGAT  
4921 CTTACCTAG ATCCTTTTAA ATTAATAATG AAGTTTAAA TCAATCTAAA GTATATATGA  
4981 GTAAACTTGG TCTGACAGTT ACCAATGCTT AATCAGTGAG GCACCTATCT CAGCGATCTG  
5041 TCTATTTCTG TCATCCATAG TTGCCTGACT CCCCCTCGTG TAGATAACTA CGATACGGGA  
5101 GCGCTTACCA TCTGGCCCCA GTGCTGCAAT GATACCGCGA GACCCAGCTA CACCGCTCC  
5161 AGATTTATCA GCAATAAAC ACCAGCCGG AAGGGCCGAG CGCAGAAGTG GTCCGTCAAC  
5221 TTTATCCGCC TCCATTAGT CTATTAATTG TTGCCGGGAA GCTAGAGTAA GTAGTTCGCC  
5281 AGTTAATAGT TTGCGCAACG TTGTTGGCAT TGCTACAGGC ATCGTGGTGT CACTCTCGTC  
5341 GTTTGGTATG GCTTCATTC A GCTCCGGTTC CCAACGATCA AGGCGAGTTA CATGATCCCC  
5401 CATGTTGTGC AAAAAAGCGG TTAGCTCCTT CGGTCCCTCC ATCGTTGTCA GAAGTAAGTT  
5461 GGCCGAGTG TTATCACTCA TGGTTATGGC AGCACTGCAT AATTCTCTTA CTGTCATGCC  
5521 ATCCGTAAGA TGCTTTTCTG TGACTGGTGA GACTCAACC AAGTCATTCT GAGAAATAGT

5581 TATGCGGCGA CCGAGTTGCT CTTGCCCGGC GTCAATACGG GATAATAGTG TATCACATAG  
5641 CAGAACTTTA AAAGTGCTCA TCATTGGAAA ACGTTCTTCG GGGCGAAAAC TCTCAAGGAT  
5701 CTTACCGCTG TTGAGATCCA GTTCGATGTA ACCCACTCGT GCACCCAAC TATCTTCAGC  
5761 ATCTTTTACT TTCACCAGCG TTTCTGGGTG AGCAAAAACA GGAAGGCAAA ATGCCGAAA  
5821 AAAGGGAATA AGGGCGACAC GGAAATGTTG AATACTCATA CTCTTCCTTT TTCAATGGGT  
5881 AATAACTGAT ATAATTAAT TGAAGCTCTA ATTTGTGAGT TTAGTATACA TGCATTTACT  
5941 TATAATACAG TTTTTTAGTT TTGCTGGCCG CATCTTCTCA AATATGCTTC CCAGCCTGCT  
6001 TTTCTGTAAC GTTCACCCTC TACCTTAGCA TCCCTTCCCT TTGCAAATAG TCCCTTCCA  
6061 ACAATAATAA TGTCAGATCC TGTAGAGACC ACATCATCCA CGGTTCTATA CTGTTGACCC  
6121 AATGCGTCTC CTTTGTCTATC TAAACCCACA CCGGGTGTCA TAATCAACCA ATCGTAACCT  
6181 TCATCTCTTC CACCCATGTC TCTTTGAGCA ATAAAGCCGA TAACAAAATC TTTGTGCGTC  
6241 TTCGCAATGT CAACAGTACC CTTAGTATAT TCTCCAGTAG ATAGGGAGCC CTTGCATGAC  
6301 AATTCCTGTA ACATCAAAAAG GCCTCTAGGT TCCTTTGTGA CTCTTCTGTC CGCCTGCTTC  
6361 AAACCGCTAA CAATACCTGG GCCCACCACA CCGTGTGCAT TCGTAATGTC TGCCCATTCCT  
6421 GCTATTCTGT ATACACCCGC AGAGTACTGC AATTTGACTG TATTACCAAT GTCAGCAAAT  
6481 TTTCTGTCTT CGAAGAGTAA AAAATTGTAC TTGGCGGATA ATGCCTTTAG CGGCTTAACT  
6541 GTGCCCTCCA TGGAAAAATC AGTCAAGATA TCCACATGTG TTTTTAGTAA ACAAATTTTG  
6601 GGACCTAATG CTTCAACTAA CTCAGTAAAT TCCTTGGTGG TACGAACATC CAATGAAGCA  
6661 CACAAGTTTG TTTGCTTTTC GTGCATGATA TTAATAGCT TGGCAGCAAC AGGACTAGGA  
6721 TGAGTAGCAG CACGTTCTTT ATATGTAGCT TTCGACATGA TTTATCTTCG TTTCTGTCAG  
6781 GTTTTTGTTC TGTGCAGTTG GGTAAAGAAT ACTGGGCAAT TTCATGTTTC TTCAACACTA  
6841 CATATGCGTA TATATACCAA TCTAAGTCTG TGCTCCTTCC TTCGTTCTTC CTCTGTTCG  
6901 GAGATTACCG AATCAAAAAA ATTTCAAAGA AACCGAAATC AAAAAAAGA ATAAAAAAA  
6961 AATGATGAAT TGAATTGAAA AGCTAGCTTA TCGATGATAA GCTGTCAAAG ATGAGAATTA  
7021 ATTCCACGGA CTATAGACTA TACTAGATAC TCCGTCTACT GTACGATACA CTTCCGCTCA  
7081 GGTCTTTGTC CTTTAAACGAG GCCTTACCAC TCTTTTGTGA CTCTATTGAT CCAGCTCAGC  
7141 AAAGGCAGTG TGATCTAAGA TTCTATCTTC GCGATGTAGT AAACTAGCT AGACCGAGAA  
7201 AGAGACTAGA AATGCAAAAAG GCACCTCTAC AATGGCTGCC ATCATTATTA TCCGATGTGA  
7261 CGCTGCAGCT TCTCAATGAT ATTCGAATAC GCTTTGAGGA GATACAGCCT AATATCCGAC  
7321 AAAGTGTTTT ACAGATTTAC GATCGTACTT GTTACCATC ATTGAATTTT GAACATCCGA  
7381 ACCTGGGAGT TTTCCCTGAA ACAGATAGTA TATTTGAACC TGTATAATAA TATATAGTCT  
7441 AGCGCTTTAC GGAAGACAAT GTATGTATTT CGGTTCCCTG AGAAACTATT GCATCTATTG  
7501 CATAGGTAAT CTTGCACGTC GCATCCCCGG TTCATTTTCT GCGTTTCCAT CTTGCACCTC  
7561 AATAGCATAT CTTTGTAAAC GAAGCATCTG TGCTTCATTT TGTAGAACAA AAATGCAACG  
7621 CGAGAGCGCT AATTTTTCAA ACAAAGAATC TGAGCTGCAT TTTTACAGAA CAGAAATGCA  
7681 ACGCGAAAGC GCTATTTTAC CAACGAAGAA TCTGTGCTTC ATTTTTGTAA AACAAAAATG  
7741 CAACGCGACG AGAGCGCTAA TTTTTCAAAC AAAGAATCTG AGCTGCATTT TTACAGAACA  
7801 GAAATGCAAC GCGAGAGCGC TATTTTACCA ACAAAGAATC TATACTTCTT TTTTGTCTA  
7861 CAAAAATGCA TCCCGAGAGC GCTATTTTTT TAACAAAGCA TCTTAGATTA CTTTTTTTCT  
7921 CCTTTGTGCG CTCTATAATG CAGTCTCTTG ATAACTTTTT GCACTGTAGG TCCGTTAAGG  
7981 TTAGAAGAAG GCTACTTTGG TGTCTATTTT CTCTTCCATA AAAAAAGCCT GACTCCACTT  
8041 CCCGCGTTTA CTGATTACTA GCGAAGCTGC GGGTGCATTT TTTCAAGATA AAGGCATCCC  
8101 CGATTATATT CTATACCGAT GTGGATTGCG CATACTTTGT GAACAGAAAG TGATAGCGTT  
8161 GATGATTCTT CATTGGTCAG AAAATTATGA ACGGTTTCTT CTATTTTGTG TCTATATACT  
8221 ACGTATAGGA AATGTTTACA TTTTTCGTATT GTTTTCGATT CACTCTATGA ATAGTTCTTA  
8281 CTACAATTTT TTTGTCTAAA GAGTAATACT AGAGATAAAC ATAAAAAATG TAGAGGTCGA  
8341 GTTTAGATGC AAGTTCAAGG AGCGAAAGGT GGATGGGTAG GTTATATAGG GATATAGCAC  
8401 AGAGATATAT AGCAAAGAGA TACTTTTGAG CAATGTTTGT GGAAGCGGTA TTCGCAATGG  
8461 GAAGCTCCAC CCCGGTTGAT AATCAGAAAA CCCCCAAAAA CAGGAAGATT GTATAAGCAA  
8521 ATATTTAAAT TGTAACCGTT AATATTTTGT TAAAAATCGC GTTAAATTTT TGTAAATCA  
8581 GCTCATTTTT TAACGAATAG CCCGAAATCG GCAAAATCCC TTATAAATCA AAAGAATAGA  
8641 CCGAGATAGG GTTGAGTGTT GTTCCAGTTT CCAACAAGAG TCCACTATTA AAGAACGTGG  
8701 ACTCCAACGT CAAAGGGCGA AAAAGGGTCT ATCAGGGCGA TGGCCCACTA CGTGAACCAT  
8761 CACCCTAATC AAGTTTTTTG GGGTTCAGGT GCCGTAAAGC AGTAAATCGG AAGGGTAAAC  
8821 GGATGCCCCC ATTTAGAGCT TGACGGGGAA AGCCGGCGAA CGTGCGGAGA AAGGAAGGGA

8881 AGAAAGCGAA AGGAGCGGG GCTAGGGCGG TGGGAAGTGT AGGGGTCACG CTGGGCGTAA  
8941 CCACCACACC CGCCGCGCTT AATGGGGCGC TACAGGGCGC GTGGGGATGA TCCACTAGT

//

|              |                     |                                                                                                                                                                                                                                              |     |        |             |
|--------------|---------------------|----------------------------------------------------------------------------------------------------------------------------------------------------------------------------------------------------------------------------------------------|-----|--------|-------------|
| LOCUS        | pNB2354             | 13588 bp                                                                                                                                                                                                                                     | DNA | linear | 15-JUN-2012 |
| FEATURES     | Location/Qualifiers |                                                                                                                                                                                                                                              |     |        |             |
| misc_feature | 1..297              | /note="GAL10"                                                                                                                                                                                                                                |     |        |             |
| misc_feature | 393..492            | /note="Partial U3"                                                                                                                                                                                                                           |     |        |             |
| misc_feature | 493..503            | /note="start of transcription "                                                                                                                                                                                                              |     |        |             |
| misc_feature | 493..543            | /note="R"                                                                                                                                                                                                                                    |     |        |             |
| misc_feature | 613..620            | /note="5' PBS"                                                                                                                                                                                                                               |     |        |             |
| misc_feature | 544..610            | /note="U5"                                                                                                                                                                                                                                   |     |        |             |
| misc_feature | 686..1306           | /note="Capsid"                                                                                                                                                                                                                               |     |        |             |
| CDS          | 686..1306           | /note=""                                                                                                                                                                                                                                     |     |        |             |
|              |                     | /translation="MSFMDQIPGGGNYPKLPVECLPNFPPIQPSLTFRGRNDSHKLNKFI<br>ISEIMLNMSMISWPNDASRIVYCRRHLLNPAAQWANDFVQEQGILEITFDTFIQGLYQ<br>HFYKPPDINKIFNAITQLSEAKLGIERLNQRFRKIWDRMPPDFMTEKAAIMTYTRLLT<br>KETYNIVRMHKPETLKDAMEEAYQTTALTERFFPGFELDADGDTIIG" |     |        |             |
| misc_feature | 1307..1384          | /note=""                                                                                                                                                                                                                                     |     |        |             |
| CDS          | 1307..1384          | /note=""                                                                                                                                                                                                                                     |     |        |             |
|              |                     | /translation="ATTHLQEEYDSDYDSEDNLTQNGYVH"                                                                                                                                                                                                    |     |        |             |
| misc_feature | 1385..1543          | /note="Nucleocapsid"                                                                                                                                                                                                                         |     |        |             |
| CDS          | 1385..1543          | /note=""                                                                                                                                                                                                                                     |     |        |             |
|              |                     | /translation="TVRTRRSYNKPMNSHRNRRNNNPSREECIKNRLCFYCKKEGHRL<br>NECRARKASSNRS"                                                                                                                                                                 |     |        |             |
| misc_feature | 1543..1544          | /note="A T was deleted between this T-C to remove the<br>frameshift"                                                                                                                                                                         |     |        |             |
| misc_feature | 1545..1557          | /note="Nucleocapsid"                                                                                                                                                                                                                         |     |        |             |
| CDS          | 1545..1557          | /note=""                                                                                                                                                                                                                                     |     |        |             |
|              |                     | /translation=""                                                                                                                                                                                                                              |     |        |             |
| misc_feature | 1558..5280          | /note="POL3"                                                                                                                                                                                                                                 |     |        |             |
| misc_feature | 5333..5388          | /note="MS2"                                                                                                                                                                                                                                  |     |        |             |
| misc_feature | 5281..5326          | /note="U3"                                                                                                                                                                                                                                   |     |        |             |
| misc_feature | 5394..5566          | /note="U3"                                                                                                                                                                                                                                   |     |        |             |
| misc_feature | 5502..5514          | /note="3' PBSA"                                                                                                                                                                                                                              |     |        |             |
| misc_feature | 5518..5529          | /note="3' PBSB"                                                                                                                                                                                                                              |     |        |             |
| misc_feature | 5567..5617          | /note="R"                                                                                                                                                                                                                                    |     |        |             |

```

misc_feature      5575..5578
                  /note="mapped end of transcript 1"
misc_feature      5596..5598
                  /note="mapped end of transcript 2"
misc_feature      5608..5610
                  /note="mapped end of transcript 3"
misc_feature      5615..5617
                  /note="mapped end of transcript 4"
misc_feature      5618..5684
                  /note="U5"
misc_feature      5281..5326
                  /note="POL3"
source            1..13588
                  /dnas_title="pNB2354"

```

ORIGIN

```

  1  GATCAAAAAT CATCGCTTCG CTGATTAATT ACCCCAGAAA TAAGGCTAAA AACTAATCG
 61  CATTATCATC CTATGGTTGT TAATTTGATT CGTTCATTTG AAGGTTTGTG GGGCCAGGTT
121  ACTGCCAATT TTTCCCTCTC ATAACCATAA AAGCTAGTAT TGTAGAATCT TTATTGTTTCG
181  GAGCAGTGCG GCGCAGGCA CATCTGCGTT TCAGGAACGC GACCGGTGAA GACGAGGACG
241  CACGGAGGAG AGTCTTCCTT CGGAGGGCTG TCACCCGCTC GGCGGCTTCT AATCCGTACT
301  TCAATATAGC AATGAGCAGT TAAGCGTATT ACTGAAAGTT CCAAAGAGAA GGTTTTTTTTA
361  GGCTAAXXXX XXCTCGACTC TAGAGGATCC CCCTGAACTA CCCAAAGTAT AAATGCCTGA
421  ACAATTAGTT TAGATCCGAG ATTCCGCGCT TCCACCACTT AGTATGATTC ATATTTTATA
481  TAATATATAA GATAAGTAAC ATTCCGTGAA TTAATCTGAT AACTGTTTT GACAACTGGT
541  TACTTCCCTA AGACTGTTTA TATTAGGATT GTCAAGACAC TCCGGTATTA CTCGAGCCCG
601  TAATACAACA CCTGGTAGCG TTAAAGGTTA CTAATTGTTC AAACGAACCA TCGAAAAGCC
661  GAACCTAGCT ACACCACACC CCAGTATGAG CTTTATGGAT CAAATCCCAG GAGGAGGAAA
721  TTATCCAAAA CTCCCAGTAG AATGCCTTCC TAACTTCCC GATCCAACCAT CTTTGACCTT
781  CAGAGGTAGA AATGACTCGC ATAAACTGAA AACTTTTATC TCCGAAATAA TGTAAACAT
841  GTCATATGATA TCTTGGCCGA ATGATGCCAG TCGTATTGTG TACTGCAGAA GACATTTATT
901  AAACCCCGCT GCTCAGTGGG CTAATGACTT TGTACAAGAA CAAGGTATAC TTGAAATAAC
961  ATTCGACACA TTCATACAAG GATTATATCA GCATTTCTAT AAGCCACCAG ATATCAATAA
1021 AATCTTTAAT GCAATCACGC AACTTTCCGA AGCTAAACTT GGTATTGAGC GTCTCAACCA
1081 ACGATTCAGA AAGATTTGGG ACAGAATGCC ACCAGACTTC ATGACCGAAA AAGCTGCCAT
1141 AATGACATAT ACTAGGCTAT TGACAAAGGA AACCTATAAT ATTGTCAGAA TGCACAAACC
1201 AGAGACATTA AAAGACGCCA TGGAAGAGGC TTACCAGACA ACTGCACTAA CTGAAAGATT
1261 CTTCCAGGA TTCGAACTTG ATGCTGATGG AGACACTATC ATCGGTGCCA CAACCCACTT
1321 ACAAGAAGAA TACGACTCTG ACTATGATTC AGAAGATAAT CTGACCCAGA ATGGATACGT
1381 CCATACCGTA AGGACAAGAA GATCTTACAA TAAACCAATG TCAAATCATC GAAACAGGAG
1441 AAATAACAAC CCATCTAGAG AAGAATGTAT AAAAAATCGG CTATGCTTCT ATTGTAAGAA
1501 AGAGGGACAT CGCCTGAACG AATGTAGAGC ACGTAAGGCG AGTCTAACCG ATCTTGAACT
1561 CGAATCAAAA GACCAACAAA CTCCTTTTAT CAAAACCTTA CCAATTGTAC ACTATATCGC
1621 CATCCCCGAG ATGGACAATA CCGCCGAAAA AACCATAAAA ATACAAAACA CGAAAGTAAA
1681 AACCTGTTT GACAGTGGAT CACCCACGTC ATTTATCCGA AGAGATATTG TAGAACTTCT
1741 CAAATACGAA ATCTACGAGA CCCCTCCACT CCGTTTTAGA GGATTTCGTAG CCACCAAATC
1801 CGCCGTTACA TCCGAAGCAG TCACCATTGA CCTCAAAATC AATGACCTGC ATATAACTTT
1861 AGCCGCGTAC ATACTGGATA ACATGGACTA CCAATTGTTA ATTGGAAATC CAATCTTACG
1921 CCGTACCCG AAAATCCTGC ACACGTACT GAATACCAGA GAGAGCCCG ACTCCTTAAA
1981 GCCCAAGACT TATCGCTCCG AAACCGTTAA TAACGTTAGA ACCTACTCCG CTGGTAATCG
2041 TGGAACCCC AGAAACATAA AACTGTCTTT TGCCCCCACC ATTCTCGAAG CAACTGACCC
2101 GAAATCCGCT GGTAATCGTG GTGACTCCAG AACCAAAACC CTGTCTCTTG CAACCACTAC
2161 TCCTGCAGCA ATTGACCCGC TTACGACCCT TGATAACCCA GGTAGTACTC AAAGTACATT
2221 TGCGCAATTC CCGATACCTG AAGAAGCGAG CATCCTAGAA GAGGATGGAA AATACTCCAA
2281 CGTTGTCTCA ACCATTCAGA GTGTAGAACC TAATGCTACT GATCACAGCA ATAAGGACAC
2341 CTTTTGCACT TTGCCAGTTT GGTTACAACA GAAGTATAGA GAGATCATAC GTAATGATCT

```



2401 CCCACCAAGA CCTGCCGACA TTAATAACAT CCCCCTAAAA CATGATATTG AAATTA AAC  
2461 TGGCGCAAGA CTACCTCGAC TACAGCCATA CCATGTTACA GAAAAGAACG AACAGAAAT  
2521 CAACAAAATA GTTCAAAAAC TGCTCGATAA CAAGTTCATT GTTCCCTCAA AGTCGCCTTG  
2581 CAGCTCCCCT GTAGTCCCTG TCCCGAAGAA AGACGGTACC TTCCGACTCT GCGTCGATTA  
2641 CCGCACCTG AACAAAGCTA CCATCTCCGA CCCATTCCCA TTACCCAGAA TCGACAACCT  
2701 ATTGAGCCGT ATTGGAATG CCCAGATATT TACCACGCTA GATTTGCATA GTGTTACCA  
2761 CCAGATCCCG ATGGAACCCA AAGACCGCTA CAAAACCGCC TTTGTACACAC CATCCGGTAA  
2821 GTATGAATAT ACCGTCATGC CATTGGCTT AGTCAATGCA CCTAGTACAT TCGCAAGATA  
2881 CATGGCTGAT ACATTTAGAG ACCTGAGATT CGTCAATGTT TACCTTGATG ATATATTAAT  
2941 ATTCTCCGAA TCTCCAGAAG AACATTGGAA ACATTTAGAC ACGGTACTAG AAAGATTA  
3001 GAACGAGAAC CTCATTGTTA AGAAGAAAA ATGTAAATTT GCATCTGAAG AA  
3061 TTTAGGCTAT AGTATTGGAA TCCAGAAAA AGCTCCACTA CAGCACA  
3121 CCGAGACTTT CCGACGCTA AAACAGTAAA ACAAGCACAG AGATTTT  
3181 TTA  
3241 TTGTGACAAA AGTCAATGGA CAGAAAAACA AGACAAGGCA ATTGATAAAC TAA  
3301 CTTGTGTAAC TCCCCGTC TAGTACCATT CAACAACAAA GCAA  
3361 AGACGCCTCA AAAGACGGCA TTGGTGCTGT TCTAGAAGAA GTCGACAACA  
3421 TGTGGTACT GTCGGTACT TCTCTAAATC CTTAGAGAGT GCCCAGAAAA  
3481 TGGCGAATTA GAACTACTG GAATTATCAA AGCACTCCAC CACTCCGAT  
3541 CGAAAGCAT TTCACGTAA GAACGACCA CATTAGTTG TTATCATTAC  
3601 CGAACCCGAC GAACGCGTGC AACGCTGGTT AGATGACCTA GCCACATATG  
3661 AGAATACCTA GCTGGACCCA AGAACGTTGT CGCAGATGCC ATATCCCGTG  
3721 TATAACCCG GAAACATCCC GACCTATCGA CACAGAAAGC TGGAAATCTT  
3781 AGACCCATTA TGTAGTGCTG TCTTAATTC TATGAAAGAA TTGACACAAC  
3841 ACCTGAAGAT ATGTCAGCCT TCCGTAGTTA CCAGAAAGAA CTCGA  
3901 CCGAAAGAAT TATTCCCTAG AAGACGAAAT GATCTATTAC CAAGACCGAC  
3961 AATAAAACAA CAGAACGCAG TTATGAGACT ATATCATGAC CATACTTAT  
4021 TTTTGGTGTA ACAGTGACCC TTGCGAAAA CAGCCCAATT TACTATTGGC  
4081 ACATTGATC ATACAATACA TCAGGACCTG CGTACAATGT CAACTAATAA  
4141 ACCACGCTTA CATGGACTAT TACAACCACT CCCTATAGCA GAAGGAAGAT  
4201 ATCAATGGAT TTTGTGACAG GATTACCCCC GACATCAAAT AACTTGAATA  
4261 CGTAGTTGAT CGTTTTTCGA AACGCGCTCA CTTCATAGCT ACAAGGAAAA  
4321 AACACAATA ATAGATCTAC TCTTTCGATA CATTTTTCA TATCATGGTT  
4381 AATAACCAGT GATAGAGATG TCCGTATGAC CGCCGACAAA TATCAAGAAC  
4441 ACTAGGAATA AAATCGACAA TGCTTCCGC GAACCACCC CAAACAGATG  
4501 ACGAACGATA CAGACATTAA ACAGGTTACT AAGAGCCTAT GCTTCAACCA  
4561 TTGGCATGTA TATTTACCAC AAATCGAATT TGTTTACAAT TCTACACCTA  
4621 TGGAAAATCA CCATTTGAAA TTGATTTAGG ATATTTACCG AATACCCCTG  
4681 AGATGACGAA GTCAACGCAA GAAGTTTTAC TGCCGTAGAA CTTGCCAAAC  
4741 CCTTACCATC CAAACGAAGG AACAGCTAGA ACACGCTCAA ATCGAAATGG  
4801 CAATCAAAGA CGTAAACCC TATTGTTAAA CATAGGAGAT CACGATTAG  
4861 TGCATACTT AAGAAAGGTG CTTATATGAA AGTACAACAA ATATACGTCG  
4921 AGTTGTCAAG AAAATAAACG ATAACGCCTA CGAACTAGAT TTAACTCTC  
4981 GCACAGAGTT ATTAATGTAC AATTCCTGAA AAAGTTTGTA TACCGTCCAG  
5041 AAAGAATAAA CCAATCAGCT CCACTGAAAG AATTAAGAGA GCACACGAAG  
5101 CATAGGAATA GATACTACAC ACAAACCTTA CTTATGTCAC ATGCAAGATG  
5161 ACTTTCAGTA GAATACTCAG AAGCTGAATT TTGCCAAAT CCCGAAAGAA  
5221 AATATTAGCC AACTTTAGAC AACTCTACGA AACCAAGAC AACCTGAGA  
5281 TGTGTATCT CAAAATGAGA TATGTCAGTA TGACAATACG TCACCCGGCT  
5341 ATCACCCATG TCTGCGGTCG ACTCTAGAAA CATGAGGATC ACCCATGTCC  
5401 TAAAACACAT ATGAAACAAC CTTATAACAA AACGAACAAC ATGAGACAAA  
5461 CCCTAGCTGA ACTACCCAAA GTATAAATGC CTGAACAATT AGTTTAGATC  
5521 CGCTTCCACC ACTTAGTATG ATTCATATTT TATATAATAT ATAAGATAAG  
5581 TGAATTAATC TGATAAACTG TTTTGACAAC TGTTACTTC CTAAGACTG  
5641 GATTGTCAAG ACACTCCGGT ATTACTCGAG CCCGTAATAC AACAGAAAGT

5701 ATGCTCTATT TATGGGAATA TGA CTATACT AATGTCACCC ACGATGGCCG GAGTAGCTGT  
5761 GATGAGCATC TTTTGTCTG GCGGCTTAA AACGTGAGCA AAATTGTACT GTAAATTACT  
5821 TACGTTATCA ATGGAAGTGT GTGAATTTTCG TGATAAAATT ATTGTCAGAA TAGTGACTTC  
5881 ATTATTCTTT ATA ACTAACC ATTAGGATCA TATAAGTAAT CAGATGCAGT TCGTCATTAA  
5941 TATGTCAGGA TGGATAACCA TAGGTAAGCA CGTGATTATG GAAGGACAGT AAAGTTACCG  
6001 ATCTACTTTT TTGAATGATC AACTTGGTGT TTTTCATCTAT AAGGATATGG GTCGTTACAT  
6061 TGAAACTATA GTAAAAGATC TCGTTATTGG TATATCGGTC ATAATGAAGA TGAAATAGTC  
6121 GGTATGTATT TTTATACCCC CCCCTATATG GTAAAAAGGT TAAGATTCAT ATTTAAATCT  
6181 TCATTAATAC CACCTCTAAT TTCTAATTAC CAACATTTTT AACTCCACTT TTATTATATG  
6241 CTATATACAA CATTATGTAA AAGGAGTATA CCAAAAATTC TCCTTCATAA TATAGGGAAT  
6301 TCCACGGACT ATAGACTATA CTAGTATACT CCGTCTACTG TACGATACAC TTCCGCTCAG  
6361 GTCCTTGTC TTTAACGAGG CCTTACCACT CTTTTGTTAC TCTATTGATC CAGCTCAGCA  
6421 AAGGCAGTGT GATCTAAGAT TCTATCTTCG CGATGTAGTA AA ACTAGCTA GACCGAGAAA  
6481 GAGACTAGAA ATGCAAAAAG CACTTCTACA ATGGCTGCCA TCATTATTAT CCGATGTGAC  
6541 GCTGCAGCTT CTCAATGATA TTCGAATACG CTTTGAGGAG ATACAGCCTA ATATCCGACA  
6601 AACTGTTTTA CAGATTTACG ATCGTACTTG TTACCCATCA TTGAATTTTG AACATCCGAA  
6661 CCTGGGAGTT TTCCCTGAAA CAGATAGTAT ATTTGAACCT GTATAATAAT ATATAGTCTA  
6721 GCGCTTTTAC GAAGACAATG TATGTATTTT GGTTCCTGGA GAAACTATTG CATCTATTGC  
6781 ATAGGTAATC TTGCACGTCG CATCCCGGT TCAATTTCTG CGTTTCCATC TTTGCACTCA  
6841 ATAGCATATC TTTGTTAACG AAGCATCTGT GCTTCATTTT GTAGAACAAA AATGCAACGC  
6901 GAGAGCGCTA ATTTTTCAAA CAAAGAATCT GAGTCGATT TTTACAGAAC AGAAATGCAA  
6961 CGCGAAAGCG CTATTTTACC AACGAAGAAT CTGTGCTTCA TTTTGTAAA ACAAATGTC  
7021 AACGCGAGAG CGCTAATTTT TCAAACAAAG AATCTGAGCT GCATTTTTTAC AGAACAGAAA  
7081 TGCAACGCGA GAGCGCTATT TTACCAACAA AGAATCTATA CTTCTTTTTT GTTCTACAAA  
7141 AATGCATCCC GAGAGCGCTA TTTTCTAAC AAAGCATCTT AGATTACTTT TTTTCTCCTT  
7201 TGTGCGCTCT ATAATGCAGT CTCTTGATAA CTTTTTGCAC TGTAGGTCCG TTAAGGTTAG  
7261 AAGAAGGCTA CTTTGGTGTC TATTTTCTCT TCCATAAAAA AAGCCTGACT CCACTTCCCG  
7321 CGTTTACTGA TTACTAGCGA AGCTGCGGGT GCATTTTTTC AAGATAAAGG CATCCCCGAT  
7381 TATATTCTAT ACCGATGTGG ATTGCGCATA CTTTGTGAAC AGAAAGTGAT AGCGTTGATG  
7441 ATTCTTCATT GGTCAGAAAA TTATGAACGG TTTCTTCTAT TTTGTCTCTA TATACTACGT  
7501 ATAGGAAATG TTTACATTTT CGTATTGTTT TCGATTCACT CTATGAATAG TTCTTACTAC  
7561 AATTTTTTTT TCTAAAGAGT AATACTAGAG ATAAACATAA AAAATGTAGA GGTGAGTTT  
7621 AGATGCAAGT TCAAGGAGCG AAAGGTGGAT GGGTAGGTTA TATAGGGATA TAGCACAGAG  
7681 ATATATAGCA AAGAGATACT TTTGAGCAAT GTTTGTGGAA GCGGTATTTC CAATATTTTA  
7741 GTAGCTCGTT ACAGTCCGGT GCGTTTTTGG TTTTTTGAAG GTGCGTCTTC AGAGCGCTTT  
7801 TGGTTTTTCAA AAGCGCTCTG AAGTTCCTAT ACTTCTAGA GAATAGGAAC TTCGGAATAG  
7861 GAACTTCAA GCGTTTCCGA AAACGAGCGC TTCCGAAAAT GCAACGCGAG CTGCGCACAT  
7921 ACAGCTCACT GTTACGTCG CACCTATATC TGCGTGTGTC CTGTATATAT ATATACATGA  
7981 GAAGAACGGC ATAGTGCGTG TTTATGCTTA AATGCGTACT TATATGCGTC TATTTATGTA  
8041 GGATGAAAGG TAGTCTAGTA CCTCCTGTGA TATTATCCCA TTCCATGCGG GGTATCGTAT  
8101 GCTTCTTCA GCACTACCTT TTAGCTGTTT TATATGCTGC CACTCCTCAA TTGGATTAGT  
8161 CTCATCCTTC AATGCTATCA TTTCTTTTGA TATTGGATCA TATGCATAGT ACCGAGAAAC  
8221 TAGTGCGAAG TAGTGATCAG GTATTGCTGT TATCTGATGA GTATACGTTG TCCTGGCCAC  
8281 GGCAGAAGCA CGCTTATCGC TCCAATTTCC CACAACATTA GTCAACTCCG TTAGGCCCTT  
8341 CATTGAAAGA AATGAGGTCA TCAAATGTCT TCCAATGTGA GATTTTGGGC CATTTTTTAT  
8401 AGCAAAGATT GAATAAGGCG CATTTTTCTT CAAAGCTTTA TTGTACGATC TGACTAAGTT  
8461 ATCTTTTAA AATTGGTATT CCTGTTTATT GCTTGAAGAA TTGCCGGTCC TATTTACTCG  
8521 TTTTAGGACT GGTTCAGAA TCGTCTTCCC TATAGTGAGT CGTATTAATT CGATATCCGT  
8581 AATCATGGTC ATAGCTGTTT CCTGTGTGAA ATTGTTATCC GCTCACAATT CCACACAACA  
8641 TACGAGCCGG AAGCATAAAG TGTAAGCCCT GGGGTGCCTA ATGAGTGAGC TAACACAT  
8701 TAATTGCGTT GCGCTCACTG CCCGTTTTCC AGTCGGGAAA CCTGTGCTGC CAGCTGCATT  
8761 AATGAATCGG CCAACGCGCG GGGAGAGGCG GTTTGCGTAT TGGGCGCTCT TCCGCTTCCT  
8821 CGCTCACTGA CTGCTGCGC TCGGTCGTTT GGCTGCGGCG AGCGGTATCA GCTCACTCAA  
8881 AGGCGGTAAT ACGGTTATCC ACAGAATCAG GGGATAACGC AGGAAAGAAC ATGTGAGCAA  
8941 AAGGCCAGCA AAAGGCCAGG AACCGTAAAA AGGCCGCGTT GCTGGCGTTT TTCCATAGGC

9001 TCCGCCCCCC TGACGAGCAT CACAAAAATC GACGCTCAAG TCAGAGGTGG CGAAACCCGA  
 9061 CAGGACTATA AAGATACCAG GCGTTTCCCC CTGGAAGCTC CCTCGTGCGC TCTCCTGTTT  
 9121 CGACCCTGCC GCTTACCGGA TACCTGTCCG CCTTCTCCC TTCGGAAGC GTGGCGTTT  
 9181 CTCATAGCTC ACGCTGTAGG TATCTCAGTT CGGTGTAGGT CGTTCGCTCC AAGCTGGGCT  
 9241 GTGTGCACGA ACCCCCCGTT CAGCCCGACC GCTGCGCCTT ATCCGGTAAC TATCGTCTTG  
 9301 AGTCCAACCC GGTAAGACAC GACTTATCGC CACTGGCAGC AGCCACTGGT AACAGGATTA  
 9361 GCAGAGCGAG GTATGTAGGC GGTGCTACAG AGTTCTTGAA GTGGTGGCCT AACTACGGCT  
 9421 AACTAGAAG GACAGTATTT GGTATCTGCG CTCTGCTGAA GCCAGTTACC TTCGAAAAA  
 9481 GAGTTGGTAG CTCTTGATCC GGCAAACAAA CCACCGCTGG TAGCGGTGGT TTTTTTGT  
 9541 GCAAGCAGCA GATTACGCGC AGAAAAAAG GATCTCAAGA AGATCCTTTG ATCTTTTCTA  
 9601 CGGGGTCTGA CGCTCAGTGG AACGAAAAC CACGTTAAGG GATTTTGGTC ATGAGATTAT  
 9661 CAAAAGGAT CTTCACCTAG ATCCTTTTAA ATTAATAATG AAGTTTTAAA TCAATCTAAA  
 9721 GTATATATGA GTAAACTTGG TCTGACAGTT ACCAATGCTT AATCAGTGAG GCACCTATCT  
 9781 CAGCGATCTG TCTATTTCTG TCATCCATAG TTGCCTGACT CCCCCTCGTG TAGATAACTA  
 9841 CGATACGGGA GGGCTTACCA TCTGGCCCCA GTGCTGCAAT GATACCGCGA GACCACGCT  
 9901 CACCGGCTCC AGATTTATCA GCAATAAAC AGCCAGCCGG AAGGGCCGAG CGCAGAAGTG  
 9961 GTCCTGCAAC TTTATCCGCC TCCATCCAGT CTATTAATTG TTGCCGGGAA GCTAGAGTAA  
 10021 GTAGTTCGCC AGTTAATAGT TTGCGCAACG TTGTGCCAT TGCTACAGGC ATCGTGGTGT  
 10081 CACGTCGTC GTTTGGTATG GCTTCAATCA GCTCCGTTT CCAACGATCA AGCGTGGTTA  
 10141 CATGATCCCC CATGTTGTGC AAAAAAGCGG TTAGCTCCTT CGGTCCTCCG ATCGTGTGCA  
 10201 GAAGTAAGTT GGCCGCAAGT TTATCACTCA TGGTTATGGC AGCACTGCAT AATCCTCTTA  
 10261 CTGTCATGCC ATCCGTAAGA TGCTTTTCTG TGACTGGTGA GTACTCAACC AAGTCATTCT  
 10321 GAGAATAGTG TATGCGGCGA CCGAGTTGGT CTTGCCCGGC GTCAATACGG GATAATACCG  
 10381 CGCCACATAG CAGAACTTTA AAAGTGCTCA TCATTGGAAA ACGTTCTTCG GGGCGAAAAC  
 10441 TCTCAAGGAT CTTACCGCTG TTTAGATCCA GTTCGATGTA ACCCACTCGT GCACCCAAC  
 10501 GATCTTCAGC ATCTTTTACT TTCACCAGCG TTTCTGGGTG AGCAAAAACA GGAAGGCAAA  
 10561 ATGCCGCAAA AAAGGGAATA AGGGCGACAC GGAAATGTTG AATACTCATA CTCTTCCTTT  
 10621 TTCAATATTA TTGAAGCATT TATCAGGGTT ATTGTCTCAT GAGCGGATAC ATATTTGAAT  
 10681 GTATTTAGAA AAATAAACAA ATAGGGGTTT CGCGCACATT TCCCCGAAAA GTGCCACCTG  
 10741 ACGTCTAAGA AACCATTATT ATCATGACAT TAACCTATAA AAATAGGCGT ATCACGAGGC  
 10801 CCTTTCGTCT CGCGCGTTT GGTGATGACG GTGAAAACCT CTGACACATG CAGCTCCCGG  
 10861 AGACGGTAC AGCTTGCTG TAAGCGGATG CCGGGAGCAG ACAAGCCCGT CAGGGTGCCT  
 10921 CAGCGGGTGT TGGCGGGTGT CGGGGCTGGC TTAACTATGC GGCATCAGAG CAGATTGTAC  
 10981 TGAGAGTGCA CCATATGCGG TGTGAAATAC CGCACAGATG CGTAAGGAGA AAATACCGCA  
 11041 TCAGGAANTT CCAGACGATT GAGCGTCAA ATGTAGGTAT TTCCATGAGC GTTTTTCCTG  
 11101 TTGCAATGGC TGGCGGTAAT ATTGTTCTGG ATATTACCAG CAAGCCGAT AGTTTGAGTT  
 11161 CTTCTACTCA GGCAAGTGAT GTTATTACTA ATCAAAGAAG TATTGCGACA ACGGTAAATT  
 11221 TGCCTGATGG ACAGACTCTT TTACTCGGTG GCCTCACTGA TTATAAAAAC ACTTCTCAGG  
 11281 ATTCTGGCGT ACCGTTCCCTG TCTAAAATCC CTTTAATCGG CCTCCTGTTT AGCTCCCGCT  
 11341 CTGATTCTAA CGAGGAAAGC ACGTTATACG TGCTCGTCAA AGCAACCATA GTACGCGCCC  
 11401 TGTAGCGGCG CATTAAGCGC GGCGGGTGTG GTGGTTACGC GCAGCGTGAC CGCTACACTT  
 11461 GCCAGCGCCC TAGCGCCCGC TCCTTTCGCT TTCTTCCCTT CTTTGTGCGC CACGTTGCGC  
 11521 GGTTCCTCCC GTCAAGTCTT AAATCGGGGG CTCCCTTTAG GGTTCGGATT TAGTGCTTTA  
 11581 CGGCACCTCG ACCCCAAAAA ACTTGATTAG GGTGATGGTT CACGTAGTGG GCCATCGCCC  
 11641 TGATAGACGG TTTTTCGCCC TTTGACGTTG GAGTCCACGT TCTTTAATAG TGGACTCTTG  
 11701 TTCCAAACTG GAACAACACT CAACCCTATC TCGGTCTATT CTTTTGATTT ATAAGGGATT  
 11761 TTGCCGATTT CGGCCTATTG GTTAAAAAAT GAGCTGATTT AACAAAAATT TAACGCGAAT  
 11821 TTTAACAAA TATTAACGTT TACAATTTAA ATATTGCTT ATACAATCTT CCTGTTTTTG  
 11881 GGGCTTTTCT GATTATCAAC CGGGGTACAT ATGATTGACA TGCTAGTTTT ACCATTACCG  
 11941 TTCATCGATT CTTTGTTTG CTCCAGACTC TCAGGCAATG ACCTGATAGC CTTTGTAGAC  
 12001 CTCTCAAAAA TAGCTACCTT CTCCGGCATG AATTTATCAG CTAGAACGGT TGAATATCAT  
 12061 ATTGATGGTG ATTTGACTGT CTCCGGCCTT TCTCACCCGT TTGAATCTTT ACCTACACAT  
 12121 TACTCAGGCA TTGCATTTAA AATATATGAG GGTTCATAAA ATTTTTATCC TTGCGTTGAA  
 12181 ATAAAGGATT CTCCCGCAAA AGTATTACAG GGTCAATAAT TTTTTGGTAC AACCGATTTA  
 12241 GCTTTATGCT CTGAGGCTTT ATTGCTTAAT TTTGCTAATT CTTTGCCTTG CCTGTATGAT

12301 TTATTGGATG TTGGAANTTC CATTGCCCCT TCAGGCTGCG CAACTGTTGG GAAGGGCGAT  
12361 CGGTGCGGGC CTCTTCGCTA TTACGCCAGC TGGCGAAAGG GGGATGTGCT GCAAGGCGAT  
12421 TAAGTTGGGT AACGCCAGG TTTTCCCAGT CACGACGTTG TAAAACGACG GCCAGTGCCA  
12481 AGCTTTTCAA TTCAATTCAT CATTFTTTTTT TTATTCTTTT TTTTGATTTC GGTTCCTTTG  
12541 AAATTTTTTTT GATTTCGGTAA TCTCCGAACA GAAGGAAGAA CGAAGGAAGG AGCACAGACT  
12601 TAGATTGGTA TATATACGCA TATGTAGTGT TGAAGAAACA TGAAATTGCC CAGTATTCTT  
12661 AACCCAAC TG CACAGAACAA AAACCTGCAG GAAACGAAGA TAAATCATGT CGAAAGCTAC  
12721 ATATAAGGAA CGTGCTGCTA CTCATCCTAG TCCTGTTGCT GCCAAGCTAT TTAATATCAT  
12781 GCACGAAAAG CAAACAAACT TGTGTGCTTC ATTGGATGTT CGTACCACCA AGGAATTACT  
12841 GGAGTTAGTT GAAGCATTAG GTCCCAAAAT TTGTTTACTA AAAACACATG TGGATATCTT  
12901 GACTGATTTT TCCATGGAGG GCACAGTTAA GCCGCTAAAG GCATTATCCG CCAAGTACAA  
12961 TTTTTTACTC TTCGAAGACA GAAAATTTGC TGACATTGGT AATACAGTCA AATTGCAGTA  
13021 CTC TGCGGGT GTATACAGAA TAGCAGAATG GGCAGACATT ACGAATGCAC ACGGTGTGGT  
13081 GGGCCCAGGT ATTGTTAGCG GTTTGAAGCA GCGGCAGAA GAAGTAACAA AGGAACCTAG  
13141 AGGCCTTTTG ATGTTAGCAG AATTGTCATG CAAGGGCTCC CTATCTACTG GAGAATATAC  
13201 TAAGGTACT GTTGACATTG CGAAGAGCGA CAAAGATTTT GTTATCGGCT TTATTGCTCA  
13261 AAGAGACATG GGTGGAAGAG ATGAAGGTTA CGATTGGTTG ATTATGACAC CCGGTGTGGG  
13321 TTTAGATGAC AAGGGAGACG CATTGGGTCA ACAGTATAGA ACCGTGGATG ATGTGGTCTC  
13381 TACAGGATCT GACATTATTA TTGTTGGAAG AGGACTATTT GCAAAGGGAA GGGATGCTAA  
13441 GGTAGAGGGT GAACGTTACA GAAAAGCAGG CTGGGAAGCA TATTTGAGAA GATGCGGCCA  
13501 GCAAACTAA AAAACTGTAT TATAAGTAAA TGCATGTATA CTAAACTCAC AAATTAGAGC  
13561 TTCAATTTAA TTATATCAGT TATTACCC

//

|              |                     |                                                                                                                                                                                                                                            |     |        |             |
|--------------|---------------------|--------------------------------------------------------------------------------------------------------------------------------------------------------------------------------------------------------------------------------------------|-----|--------|-------------|
| LOCUS        | pNB2355             | 13589 bp                                                                                                                                                                                                                                   | DNA | linear | 15-JUN-2012 |
| FEATURES     | Location/Qualifiers |                                                                                                                                                                                                                                            |     |        |             |
| misc_feature | 13590..13886        | /note="Gal10"                                                                                                                                                                                                                              |     |        |             |
| misc_feature | 393..492            | /note="Partial U3"                                                                                                                                                                                                                         |     |        |             |
| misc_feature | 493..503            | /note="start of transcription "                                                                                                                                                                                                            |     |        |             |
| misc_feature | 493..543            | /note="R"                                                                                                                                                                                                                                  |     |        |             |
| misc_feature | 544..610            | /note="U5"                                                                                                                                                                                                                                 |     |        |             |
| misc_feature | 613..620            | /note="5' PBS"                                                                                                                                                                                                                             |     |        |             |
| misc_feature | 686..1306           | /note="Capsid"                                                                                                                                                                                                                             |     |        |             |
| CDS          | 686..1306           | /note=""                                                                                                                                                                                                                                   |     |        |             |
|              |                     | /translation="MSFMDQIPGGGNYPKLPVECLPNFPIQPSLTFRGRNDSHKLNKFI<br>ISEIMLNMSMISWPNDASRIVYCRRHLLNPAAQWANDFVQEQGILEITFDTFIQGLYQ<br>HFYKPPDINKIFNAITQLSEAKLGIERLNQFRKIWDRMPPDFMTEKAAIMTYTRLLT<br>KETYNIVRMHKPETLKDAMEEAYQTTALTERFFPGFELDADGDTIIG" |     |        |             |
| misc_feature | 1307..1384          | /note=""                                                                                                                                                                                                                                   |     |        |             |
| CDS          | 1307..1384          | /note=""                                                                                                                                                                                                                                   |     |        |             |
|              |                     | /translation="ATTHLQEEYDSDYDSEDNLTQNGYVH"                                                                                                                                                                                                  |     |        |             |
| misc_feature | 1385..1558          | /note="Nucleocapsid"                                                                                                                                                                                                                       |     |        |             |
| CDS          | 1385..1558          | /note=""                                                                                                                                                                                                                                   |     |        |             |
|              |                     | /translation="TVRTRRSYNKPMNSHRNRRNNNPSREECIKNRLCFYCKKEGHRL<br>NECRARKASSNRS"                                                                                                                                                               |     |        |             |
| misc_feature | 1559..1613          | /note="POL3"                                                                                                                                                                                                                               |     |        |             |
| misc_feature | 1614..1616          | /note="STOP CODON"                                                                                                                                                                                                                         |     |        |             |
| misc_feature | 5282..5327          | /note="U3"                                                                                                                                                                                                                                 |     |        |             |
| misc_feature | 1617..5327          | /note="POL3"                                                                                                                                                                                                                               |     |        |             |
| misc_feature | 5334..5389          | /note="MS2"                                                                                                                                                                                                                                |     |        |             |
| misc_feature | 5395..5567          | /note="U3"                                                                                                                                                                                                                                 |     |        |             |
| misc_feature | 5503..5515          | /note="3' PBSA"                                                                                                                                                                                                                            |     |        |             |
| misc_feature | 5519..5530          | /note="3' PBSB"                                                                                                                                                                                                                            |     |        |             |
| misc_feature | 5568..5618          | /note="R"                                                                                                                                                                                                                                  |     |        |             |
| misc_feature | 5576..5579          | /note="mapped end of transcript 1"                                                                                                                                                                                                         |     |        |             |
| misc_feature | 5597..5599          | /note="mapped end of transcript 2"                                                                                                                                                                                                         |     |        |             |

```

misc_feature 5609..5611
              /note="mapped end of transcript 3"
misc_feature 5616..5618
              /note="mapped end of transcript 4"
misc_feature 5619..5685
              /note="U5"
misc_feature 5827..6297
              /note="CYC terminator"
source       1..13589
              /dnas_title="pNB2355"

```

ORIGIN

```

 1 GATCAAAAAT CATCGCTTCG CTGATTAATT ACCCCAGAAA TAAGGCTAAA AACTAATCG
61 CATTATCATC CTATGGTGTG TAATTTGATT CGTTCATTTG AAGGTTTGTG GGGCCAGGTT
121 ACTGCCAATT TTTCTCTTC ATAACCATAA AAGCTAGTAT TGTAGAATCT TTATTGTTCG
181 GAGCAGTGCG GCGCGAGGCA CATCTGCGTT TCAGGAACGC GACCGGTGAA GACGAGGACG
241 CACGGAGGAG AGTCTTCCTT CGGAGGGCTG TCACCCGCTC GGCGGCTTCT AATCCGTACT
301 TCAATATAGC AATGAGCAGT TAAGCGTATT ACTGAAAGTT CCAAAGAGAA GGTTTTTTTA
361 GGCTAAXXXX XXCTCGACTC TAGAGGATCC CCCGAACTA CCCAAAGATA AAATGCCTGA
421 ACAATTAGTT TAGATCCGAG ATTCCGCGCT TCCACCACTT AGTATGATTC ATATTTTATA
481 TAATATATAA GATAAGTAAC ATTCGCTGAA TTAATCTGAT AACTGTTTT GACAATGGT
541 TACTTCCCTA AGACTGTTTA TATTAGGATT GTCAAGACAC TCCGGTATTA CTCGAGCCCG
601 TAATACAACA CCTGGTAGCG TTAAAGGTTA CTAATTGTTC AAACGAACCA TCGAAAAGCC
661 GAACCTAGCT ACACCACACC CCAGTATGAG CTTTATGGAT CAAATCCCAG GAGGAGGAAA
721 TTATCCAAAA CTCCCAGTAG AATGCCTTCC TAACTTCCCG ATCCAACCAT CTTTGACCTT
781 CAGAGGTAGA AATGACTCGC ATAAACTGAA AACTTTTATC TCCGAAATAA TGTAAACAT
841 GTCTATGATA TCTTGGCCGA ATGATGCCAG TCGTATTGTG TACTGCAGAA GACATTTATT
901 AAACCCCGCT GCTCAGTGGG CTAATGACTT TGTACAAGAA CAAGGTATAC TTGAAATAAC
961 ATTCGACACA TTCATACAAG GATTATATCA GCATTTCTAT AAGCCACCAG ATATCAATAA
1021 AATCTTTAAT GCAATCACGC AACTTTCCGA AGCTAAACTT GGTATTGAGC GTCTCAACCA
1081 ACGATTCAGA AAGATTTGGG ACAGAATGCC ACCAGACTTC ATGACCGAAA AAGCTGCCAT
1141 AATGACATAT ACTAGGCTAT TGACAAAGGA AACCTATAAT ATTGTCAGAA TGCACAAACC
1201 AGAGACATTA AAAGACGCCA TGGAAGAGGC TTACCAGACA ACTGCCTAA CTGAAAGATT
1261 CTTCCAGGA TTCGAACTTG ATGCTGATGG AGACACTATC ATCGGTGCCA CAACCACTT
1321 ACAAGAAGAA TACGACTCTG ACTATGATTC AGAAGATAAT CTGACCCAGA ATGGATACGT
1381 CCATACCGTA AGGACAAGAA GATCTTACAA TAAACCAATG TCAAATCATC GAAACAGGAG
1441 AAATAACAAC CCATCTAGAG AAGAATGTAT AAAAAATCGG CTATGCTTCT ATTGTAAGAA
1501 AGAGGGACAT CGCCTGAACG AATGTAGAGC ACGTAAGGCG AGTTCTAACC GATCTTGAAC
1561 TCGAATCAAA AGACCAACAA ACTCCTTTTA TCAAAACCTT ACCAATTGTA CACTAAATCG
1621 CCATCCCCGA GATGGACAAT ACCGCCGAAA AAACCATAAA AATACAAAAC ACGAAAGTAA
1681 AAACCCTGTT TGACAGTGGA TCACCCACGT CATTTATCCG AAGAGATATT GTAGAACTTC
1741 TCAAATACGA AATCTACGAG ACCCCTCCAC TCCGTTTTAG AGGATTCGTA GCCACCAAT
1801 CCGCCGTTAC ATCCGAAGCA GTCACCATTG ACCTCAAAAT CAATGACCTG CATATACTT
1861 TAGCCGCGTA CATACTGGAT AACATGGACT ACCAATTGTT AATTGGAAAT CCAATCTTAC
1921 GCCGCTACCC GAAAATCCTG CACACAGTAC TGAATACCAG AGAGAGCCCC GACTCCTTAA
1981 AGCCCAAGAC TTATCGCTCC GAAACCGTTA ATAACGTTAG AACCTACTCC GCTGGTAATC
2041 GTGGTAACCC CAGAAACATA AAAGTGTCTT TTGCCCCAC CATTCTCGAA GCAACTGACC
2101 CGAAATCCGC TGGTAATCGT GGTGACTCCA GAACCAAAAC CCTGTCTCTT GCAACCACTA
2161 CTCCTGCAGC AATTGACCCG CTTACGACCC TTGATAACCC AGGTAGTACT AAAGTACAT
2221 TTGCGCAATT CCCGATACCT GAAGAAGCGA GCATCCTAGA AGAGGATGGA AAATACCCA
2281 ACGTTGTCTC AACCATTGAG AGTGTAGAAC CTAATGCTAC TGATCACAGC AATAAGGACA
2341 CCTTTTGCAC TTTGCCAGTT TGGTTACAAC AGAAGTATAG AGAGATCATA CGTAATGATC
2401 TCCCACCAAG ACCTGCCGAC ATTAATAACA TCCCCGTAAA ACATGATATT GAAATTAAC
2461 CTGGCGCAAG ACTACCTCGA CTACAGCCAT ACCATGTTAC AGAAAAGAAC GAACAAGAAA
2521 TCAACAAAAT AGTTCAAAAA CTGCTCGATA ACAAGTTCAT TGTTCCCTCA AAGTCGCCCTT
2581 GCAGCTCCCC TGTAGTCCTC GTCCCGAAGA AAGACGGTAC CTTCCGACTC TGGTTCGATT

```

2641 ACCGCACCCT GAACAAAGCT ACCATCTCCG ACCCATTCCC ATTACCCAGA ATCGACAACC  
2701 TATTGAGCCG TATTGGAAAT GCCCAGATAT TTACCACGCT AGATTTGCAT AGTGGTTACC  
2761 ACCAGATCCC GATGGAACCC AAAGACCGCT ACAAACC GC CTTTGT CACA CCATCCGGTA  
2821 AGTATGAATA TACCGTCATG CCATTTGGCT TAGTCAATGC ACCTAGTACA TTCGCAAGAT  
2881 ACATGGCTGA TACATTTAGA GACCTGAGAT TCGTCAATGT TTACCTTGAT GATATATTAA  
2941 TATTCTCCGA ATCTCCAGAA GAACATTGGA AACATTTAGA CACGGTACTA GAAAGATTAA  
3001 AGAACGAGAA CCTCATTTGTT AAGAAGAAAA AATGTAAAT TGCATCTGAA GAAACTGAGT  
3061 TTTTAGGCTA TAGTATTGGA ATCCAGAAAA TAGCTCCACT ACAGCACAAA TGTGCAGCAA  
3121 TCCGAGACTT TCCGACGCC AAAACAGTAA AACAAAGCACA GAGATTTTTTA GGAATGATTA  
3181 ATTACTACAG ACGATTCATT CCAAATTGCT CCAAGATTGC ACAGCCAATC CAACTGTTTTA  
3241 TTTGTGACAA AAGTCAATGG ACAGAAAAAC AAGACAAGGC AATTGATAAAA CTAAAAGACG  
3301 CCTTGTGTAA CTCCCCCGTC CTAGTACCAT TCAACAACAA AGCAAAC TAC CGACTTACAA  
3361 CAGACGCCTC AAAAGACGGC ATTGGTGCTG TTCTAGAAGA AGTCGACAAC AAGAACAAC  
3421 TTGTTGGTGT CGTCGGTTAC TTCTCTAAAT CCTTAGAGAG TGCCAGAAA AACTATCCTG  
3481 CTGGCGAATT AGAACTACTT GGAATTATCA AAGCACTCCA CCACTTCCGA TATATGCTTC  
3541 ACGGAAAGCA TTTCACGTTA AGAACAGACC ACATTAGTTT GTTATCATT CAAAACAAGA  
3601 ACGAACCCGA CGAACGCGTG CAACGCTGGT TAGATGACCT AGCCACATAT GACTTCACCT  
3661 TAGAATACCT AGCTGGACCC AAGAAGCTTG TCGCAGATGC CATATCCCGT GCCGTATATA  
3721 CTATAACCCC CGAAACATCC CGACCTATCG ACACAGAAAG CTGGAAATCT TACTACAAAT  
3781 CAGACCCATT ATGTAGTGCT GTCTTAATTC ATATGAAAGA ATTGACACAA CACAACGTCA  
3841 CACCTGAAGA TATGTCAGCC TTCCGTAGTT ACCAGAAGAA ACTCGAACTA TCAGAGACCT  
3901 TCCGAAAGAA TTATTCCCTA GAAGACGAAA TGATCTATTA CCAAGACCGA CTAGTAGTAC  
3961 CAATAAAACA ACAGAACGCA GTTATGAGAC TATATCATGA CCATACCTTA TTTGGAGGAC  
4021 ATTTTGGTGT AACAGTGACC CTTGCGAAAA TCAGCCCAAT TTACTATTGG CAAAAATTAC  
4081 AACATTCGAT CATACAATAC ATCAGGACCT GCGTACAATG TCAACTAATA AAATCACACC  
4141 GACCACGCTT ACATGGACTA TTACAACCAC TCCCTATAGC AGAAGGAAGA TGGCTTGATA  
4201 TATCAATGGA TTTTGTGACA GGATTACCCC CGACATCAA TAACTTGAAT ATGATCCTCG  
4261 TCGTAGTTGA TCGTTTTTCG AAACGCGCTC ACTTCATAGC TACAAGGAAA ACCTTAGACG  
4321 CAACACA ACT AATAGATCTA CTCTTTCGAT ACATTTTTTC ATATCATGGT TTTCCAGGA  
4381 CAATAACCAG TGATAGAGAT GTCCGTATGA CCGCCGACAA ATATCAAGAA CTCACGAAA  
4441 GACTAGGAAT AAAATCGACA ATGTCTTCCG CGAACCC CCAAACAGAT GGACAATCCG  
4501 AACGAACGAT ACAGACATTA AACAGTTAC TAAGAGCCTA TGCTTCAACC AATATTCAGA  
4561 ATTGGCATGT ATATTTACCA CAAATCGAAT TTGTTTACAA TTCTACACCT ACTAGAACAC  
4621 TTGGAAAATC ACCATTTGAA ATTGATTTAG GATATTTACC GAATACCCCT GCTATTAAGT  
4681 CAGATGACGA AGTCAACGCA AGAAGTTTTA CTGCCGTAGA ACTTGCCAAA CACCTCAAAG  
4741 CCCTTACCAT CCAAACGAAG GAACAGCTAG AACACGCTCA AATCGAAATG GAAACTAATA  
4801 ACAATCAAAG ACGTAAACCC TTATTGTTAA ACATAGGAGA TCACGTATTA GTGCATAGAG  
4861 ATGCATACTT CAAGAAAAGT GCTTATATGA AAGTACAACA AATATACGTC GGACCATTTT  
4921 GAGTTGTCAA GAAAAATAAC GATAACGCCT ACGAACTAGA TTTAAACTCT CACAAGAAAA  
4981 AGCACAGAGT TATTAATGTA CAATTCCTGA AAAAGTTTGT ATACCGTCCA GACGCGTACC  
5041 CAAAGAATAA ACCAATCAGC TCCACTGAAA GAATTAAGAG AGCACACGAA GTTACTGCAC  
5101 TCATAGGAAT AGATACTACA CAAAAACTT ACTTATGTCA CATGCAAGAT GTAGACCCAA  
5161 CACTTTCAGT AGAATACTCA GAAGCTGAAT TTTGCCAAAT TCCCGAAAAGA ACACGAAGAT  
5221 CAATATTAGC CAACTTTAGA CAACTCTACG AAACACAAGA CAACCCTGAG AGAGAGGAAG  
5281 ATGTTGTATC TCAAAATGAG ATATGTCAGT ATGACAATAC GTCACCCGGC TGAACATGAG  
5341 GATCACCCAT GTCTGCGGTC GACTCTAGAA ACATGAGGAT CACCCATGTC CGGGACGTTT  
5401 ATAAAACACA TATGAAACAA CTTATAACA AAACGAACAA CATGAGACAA AACCCGACCT  
5461 TCCCTAGCTG AACTACCCAA AGTATAAATG CCTGAACAAT TAGTTTAGAT CCGGATTTCC  
5521 GCGCTTCCAC CACTTAGTAT GATTCAATAT TTATATAATA TATAAGATAA GTAACATTTCC  
5581 GTGAATTAAT CTGATAAACT GTTTTGACAA CTGGTTACTT CCCTAAGACT GTTTATATTA  
5641 GGATTGTCAA GACACTCCGG TATTACTCGA GCCCCGTAATA CAACAGAAAG TTCCATTTTG  
5701 GATGCTCTAT TTATGGGAAT ATGACTATAC GAATGTCACC CACGATGGCC GGAGTAGCTG  
5761 TGATGAGCAT CTTTTTGTCT GGGCGGCTTA AAACGTGAGC AAAATTGTAC TGTAAAATTAC  
5821 TTACGTTATC AATGGAAAGT TGTGAATTTT GTGATAAAAT TATTGTCAGA ATAGTGACTT  
5881 CATTATTCTT TATAACTAAC CATTAGGATC ATATAAGTAA TCAGATGCAG TTCGTCATTA

5941 ATATGTCAGG ATGGATAACC ATAGGTAAGC ACGTGATTAT GGAAGGACAG TAAAGTTACC  
6001 GATCTACTTT TTTGAATGAT CAACTTGGTG TTTTCATCTA TAAGGATATG GGTCTGTACA  
6061 TTGAAACTAT AGTAAAAGAT CTCGTTATTG GTATATCGGT CATAATGAAG ATGAAATAGT  
6121 CGGTATGTAT TTTTATACCC CCCCCTATAT GGTAAAAAGG TTAAGATTCA TATTTAAATC  
6181 TTCATTAATA CCACCTCTAA TTTCTAATTA CCAACATTTT TAACTCCACT TTTATTATAT  
6241 GCTATATACA ACATTATGTA AAAGGAGTAT ACCAAAAATT CTCCTTCATA ATATAGGGAA  
6301 TTCCACGGAC TATAGACTAT ACTAGTATAC TCCGTCTACT GTACGATACA CTTCGGCTCA  
6361 GGTCTTTGTC CTTTAACGAG GCCTTACCAC TCTTTTGTTA CTCTATTGAT CCAGCTCAGC  
6421 AAAGGCAGTG TGATCTAAGA TTCTATCTTC GCGATGTAGT AAAACTAGCT AGACCGAGAA  
6481 AGAGACTAGA AATGCAAAAAG GCACCTCTAC AATGGCTGCC ATCATTATTA TCCGATGTGA  
6541 CGCTGCAGCT TCTCAATGAT ATTCTGAATAC GCTTTGAGGA GATACAGCCT AATATCCGAC  
6601 AAAGTGTTTT ACAGATTTAC GATCGTACTT GTTACCCATC ATTGAATTTT GAACATCCGA  
6661 ACCTGGGAGT TTTCCCTGAA ACAGATAGTA TATTTGAACC TGTATAATAA TATATAGTCT  
6721 AGCGCTTTAC GGAAGACAAAT GTATGTATTT CGGTTCCTGG AGAAACTATT GCATCTATTG  
6781 CATAGGTAAT CTTGCACGTC GCATCCCCGG TTCATTTTCT GCGTTTCCAT CTTGCAC TTC  
6841 AATAGCATAT CTTTGTTAAC GAAGCATCTG TGCTTCATTT TGTAGAACAA AAATGCAACG  
6901 CGAGAGAGCT AATTTTTCAA ACAAGAATC TGAGCTGCAT TTTTACAGAA CAGAAATGCA  
6961 ACGCGAAAAG GCTATTTTAC CAACGAAGAA TCTGTGCTTC ATTTTTGTAA AACAAAAATG  
7021 CAACGCGAGA GCGCTAATTT TTCAAACAAA AAGACTGAGC GAATCTTTTA CAGAACAGAA  
7081 ATGCAACGCG AGAGCGCTAT TTTACCAACA AAGAATCTAT ACTTCTTTTT TGTCTACAAA  
7141 AAATGCATCC CGAGAGCGCT ATTTTTCTAA CAAAGCATCT TAGATTACTT TTTTCTCCT  
7201 TTGTGCGCTC TATAATGCAG TCTCTTGATA ACTTTTTGCA CTGTAGGTCC GTTAAGGTTA  
7261 GAAGAAGGCT ACTTTGGTGT CTATTTTTCTC TTCCATAAAA AAAGCCTGAC TCCACTTCCC  
7321 GCGTTTACTG ATTACTAGCG AAGCTGCGGG TGCATTTTTT CAAGATAAAG GCATCCCCGA  
7381 TTATATTCTA TACCGATGTG GATTGCGCAT ACTTTGTGAA CAGAAAGTGA TAGCGTTGAT  
7441 GATTCCTCAT TGGTCAGAAA ATTATGAACG GTTCTTCTA TTTTGTCTCT ATATACTACG  
7501 TATAGGAAAT GTTTACATTT TCGTATTGTT TTCGATTCAC TCTATGAATA GTTCTTACTA  
7561 CAATTTTTTT GTCTAAAAGAG TAATACTAGA GATAAACATA AAAAATGTAG AGGTGAGT  
7621 TAGATGCAAG TTCAAGGAGC GAAAGGTGGA TGGGTAGGTT ATATAGGGAT ATAGCACAGA  
7681 GATATATAGC AAAGAGATAC TTTTGAGCAA TGTTTGTGGA AGCGGTATTC GCAATATTTT  
7741 AGTAGCTCGT TACAGTCCGG TCGGTTTTTG GTTTTTTGAA AGTGCCTCTT CAGAGCGCTT  
7801 TTGGTTTTCA AAAGCGCTCT GAAGTTCCTA TACTTTCTAG AGAATAGGAA CTTCGGAATA  
7861 GGAAC TCAA AGCGTTTCCG AAAACGAGCG CTTCGAAAA TGCAACGCGA GCTGCGCACA  
7921 TACAGCTCAC TGTTACGTC GCACCTATAT CTGCGTGTG CCTGTATATA TATATACATG  
7981 AGAAGAACGG CATAGTGCGT GTTTATGCTT AAATGCGTAC TTATATGCGT CTATTTATGT  
8041 AGGATGAAAG GTAGTCTAGT ACCTCCTGTG ATATTATCCC ATTCCATGCG GGGTATCGTA  
8101 TGCTTCCTTC AGCACTACCC TTTAGCTGTT CTATATGCTG CCACTCCTCA ATTGGATTAG  
8161 TCTCATCCTT CAATGCTATC ATTTCTTTTG ATATTGGATC ATATGCATAG TACCGAGAAA  
8221 CTAGTGCGAA GTAGTGATCA GGTATTGCTG TTATCTGATG AGTATACGTT GTCCGTGGCCA  
8281 CGGCAGAAGC ACGCTTATCG CTCCAATTTT CCACAACATT AGTCAACTCC GTTAGGCCCT  
8341 TCATTGAAAG AAATGAGGTC ATCAAATGTC TTCCAATGTG AGATTTTGGG CCATTTTTTA  
8401 TAGCAAAGAT TGAATAAGGC GCATTTTTCT TCAAAGCTTT ATTGTACGAT CTGACTAAGT  
8461 TATCTTTTAA TAATTGGTAT TCCTGTTTAT TGCTTGAAGA ATTGCCGGTC CTATTTACTC  
8521 GTTTTAGGAC TGGTTCAGAA TTCGGTCTCC CTATAGTGAG TCGTATTAAT TCGATATCCG  
8581 TAATCATGGT CATAGCTGTT TCCTGTGTGA AATTGTTATC CGCTCACAAT TCCACACAAC  
8641 ATACGAGCCG GAAGCATAAA GTGTAAAGCC TGGGGTGCC T AATGAGTGAG CTAAC TACA  
8701 TTAATTGCGT TGCGCTCACT GCCCGATTTT CAGTCGGGAA ACCTGTCGTG CCAGCTGCAT  
8761 TAATGAATCG GCCAACGCGC GGGGAGAGGC GGGTTGCGTA TTGGGCGCTC TTCCGCTTCC  
8821 TCGCTCACTG ACTCGCTGCG CTCGGTCTGTT CCGCTGCGGC GAGCGGTATC AGCTCACTCA  
8881 AAGGCGGTAA TACGGTTATC CACAGAATCA GGGGATAACG CAGGAAAGAA CATGTAGCA  
8941 AAAGGCCAGC AAAAGGCCAG GAACCGTAAA AAGGCCGCGT TGCTGGCGTT TTTCCATAGG  
9001 CTCCGCCCCC CTGACGAGCA TCACAAAAAT CGACGCTCAA GTCAGAGGTG GCGAAACCCG  
9061 ACAGGACTAT AAAGATACCA GCGTTTTCCC CCTGGAAGCT CCCTCGTGCG CTCTCCTGTT  
9121 CCGACCCTGC CGCTTACCGG ATACCTGTCC GCCTTTCTCC CTTCCGGGAA GCGTGGCGCTT  
9181 TCTCATAGCT CACGCTGTAG GTATCTCAGT TCGGTGTAGG TCGTTGCTC CAAGCTGGGC



9241 TGTGTGCACG AACCCCCCGT TCAGCCCGAC CGCTGCGCCT TATCCGGTAA CTATCGTCTT  
 9301 GAGTCCAACC CGGTAAGACA CGACTTATCG CCACTGGCAG CAGCCACTGG TAACAGGATT  
 9361 AGCAGAGCGA GGTATGTAGG CGGTGCTACA GAGTTCCTGA AGTGGTGGCC TAACTACGGC  
 9421 TACACTAGAA GGACAGTATT TGGTATCTGC GCTCTGCTGA AGCCAGTTAC CTTGCGAAAA  
 9481 AGAGTTGGTA GCTCTTGATC CGGCAAACAA ACCACCGCTG GTAGCGGTGG TTTTTTTGTT  
 9541 TGCAAGCAGC AGATTACGCG CAGAAAAAAA GGATCTCAAG AAGATCCTTT GATCTTTTCT  
 9601 ACGGGGTCTG ACGCTCAGTG GAACGAAAAC TCACGTTAAG GGATTTTGGT CATGAGATTA  
 9661 TCAAAAAGGA TCTTCACCTA GATCCTTTTA AATTA AAAAAT GAAGTTTTAA ATCAATCTAA  
 9721 AGTATATATG AGTAAACTTG GTCTGACAGT TACCAATGCT TAATCAGTGA GGCACCTATC  
 9781 TCAGCGATCT GTCTATTTTCG TTCATCCATA GTTGCCGAC TCCCCGTCGT GTAGATAACT  
 9841 ACGATACGGG AGGGCTTACC ATCTGGCCCC AGTGCTGCAA TGATACCGCG AGACCCACGC  
 9901 TCACCGGCTC CAGATTTATC AGCAATAAAC CAGCCAGCCG GAAGGGCCGA GCGCAGAAGT  
 9961 GGTCTGCAA CTTTATCCGC CTCCATCCAG TCTATTAATT GTTGCCGGGA AGCTAGAGTA  
 10021 AGTAGTTCGC CAGTTAATAG TTTGCGCAAC GTTGTGCGCA TTGCTACAGG CATCGTGGTG  
 10081 TCACGCTCGT CGTTTGGTAT GGCTTCATTC AGCTCCGGTT CCCAACGATC AAGGCGAGTT  
 10141 ACATGATCCC CCATGTTGTG CAAAAAAGCG GTTAGCTCCT TCGGTCCTCC GATCGTTGTC  
 10201 AGAAGTAAGT TGGCCGCAGT GTTATCACTC ATGGTTATGG CAGCACTCAAC TAATCCTCTT  
 10261 ACTGTCATGC CATCCGTAAG ATGCTTTTCT GTGACTGGTG AGTACTCAAC CAAGTCATTC  
 10321 TGAGAATAGT GATGCGGCG ACGGATTTGG TCTTGCCCGG CGTCAATACG GGAATAACC  
 10381 GCGCCACATA GCAGAACTTT AAAAGTGCTC ATCATTTGAA AACGTTCTTC GGGGCGAAAA  
 10441 CTCTCAAGGA TCTTACCGCT GTTTAGATCC AGTTCGATGT AACCCACTCG TGCACCCAAC  
 10501 TGATCTTCAG CATCTTTTAC TTTACCAGC GTTTCTGGGT GAGCAAAAAC AGGAAGGCAA  
 10561 AATGCCGCAA AAAAGGGAAT AAGGGCGACA CGGAAATGTT GAATACTCAT ACTCTTCCTT  
 10621 TTTCAATATT ATTGAAGCAT TTATCAGGGT TATTGTCTCA TGAGCGGATA CATATTTGAA  
 10681 TGTATTTAGA AAAATAAACA AATAGGGGTT CCGCGCACAT TTCCCCGAAA AGTGCCACCT  
 10741 GACGTCTAAG AAACCATTAT TATCATGACA TTAACCTATA AAAATAGGCG TATCACGAGG  
 10801 CCCTTTCGTC TCGCGCGTTT CGGTGATGAC GGTGAAAACC TCTGACACAT GCAGCTCCCG  
 10861 GAGACGGTCA CAGCTTGTCT GTAAGCGGAT GCCGGGAGCA GACAAGCCCG TCAGGGTGCG  
 10921 TCAGCGGGTG TTGGCGGGTG TCGGGGCTGG CTTAACTATG CCGCATCAGA GCAGATTGTA  
 10981 CTGAGAGTGC ACCATATGCG GTGTGAAATA CCGCACAGAT GCGTAAGGAG AAAATACCGC  
 11041 ATCAGGAANT TCCAGACGAT TGAGCGTCAA AATGTAGGTA TTTCCATGAG CGTTTTTCCT  
 11101 GTTGCAATGG CTGGCGGTAA TATTGTTCTG GATATTACCA GCAAGGCCGA TAGTTTGAGT  
 11161 TCTTCTACTC AGGCAAGTGA TGTTATTACT AATCAAAGAA GTATTGCGAC AACGGTTAAT  
 11221 TTGCGTGATG GACAGACTCT TTTACTCGGT GGCCTCACTG ATTATAAAAA CACTTCTCAG  
 11281 GATTCCTGGC TACCGTTCCT GTCTAAAATC CCTTTAATCG GCCTCCTGTT TAGCTCCCGC  
 11341 TCTGATTCTA ACGAGGAAAG CACGTTATAC GTGCTCGTCA AAGCAACCAT AGTACGCGCC  
 11401 CTGTAGCGGC GCATTAAGCG CGGCGGGTGT GGTGGTTACG CGCAGCGTGA CCGCTACACT  
 11461 TGCCAGCGCC CTAGCGCCCG CTCCTTTTCGC TTTCTTCCCC TCCTTTGTGCG CCACGTTGCG  
 11521 CGGCTTTCCC CGTCAAGCTC TAAATCGGGG GCTCCCTTTA GGGTTCCGAT TTAGTGCTTT  
 11581 ACGGCACCTC GACCCCAAAA AACTTGATTA GGGTGATGGT TCACGTAGTG GGCCATCGCC  
 11641 CTGATAGACG GTTTTTTCGCC CTTTGACGTT GGAGTCCACG TTCTTTAATA GTGGACTCTT  
 11701 GTTCCAAACT GGAACAACAC TCAACCCTAT CTCGGTCTAT TCTTTTGATT TATAAGGGAT  
 11761 TTTGCCGATT TCGGCCTATT GGTAAAAAAA TGAGCTGATT TAACAAAAAT TTAACGCGAA  
 11821 TTTTAACAAA ATATTAACGT TTACAATTTA AATATTTGCT TATACAATCT TCCTGTTTTT  
 11881 GGGGCTTTTC TGATTATCAA CCGGGGTACA TATGATTGAC ATGCTAGTTT TACGATTACC  
 11941 GTTCATCGAT TCTCTTGTTT GCTCCAGACT CTCAGGCAAT GACCTGATAG CCTTGTAGA  
 12001 CCTCTCAAAA ATAGCTACCC TCTCCGGCAT GAATTTATCA GCTAGAACGG TTGAATATCA  
 12061 TATTGATGGT GATTTGACTG TCTCCGGCCT TTCTCACCCG TTTGAATCTT TACCTACACA  
 12121 TTAATCAGGC ATTGCATTTA AAATATATGA GGGTCTTAAA AATTTTTATC CTGCGTTGA  
 12181 AATAAAGGAT TCTCCCGCAA AAGTATTACA GGGTCATAAT GTTTTTGGTA CAACCGATTT  
 12241 AGCTTTTATG TCTGAGGCTT TATTGCTTAA TTTTGCTAAT TCTTTGCTT CCCTGTATGA  
 12301 TTTATTGGAT GTTGAANTT CCATTCGCC TTCAGGCTGC GCAACTGTTG GGAAGGGCGA  
 12361 TCGGTGCGGG CCTCTTCGCT ATTACGCCAG CTGGCGAAAG GGGGATGTGC TGCAAGGCGA  
 12421 TTAAGTTGGG TAACGCCAGG GTTTTCCAG TCACGACGTT GTAAAACGAC GGCCAGTGCC  
 12481 AAGCTTTTCA ATTCAATTCA TCATTTTTTT TTTATTCTTT TTTTTGATTT CGGTTTCTTT

12541 GAAATTTTTT TGATTCGGTA ATCTCCGAAC AGAAGGAAGA ACGAAGGAAG GAGCACAGAC  
12601 TTAGATTGGT ATATATACGC ATATGTAGTG TTGAAGAAAC ATGAAATTGC CCAGTATTCT  
12661 TAACCCAACT GCACAGAACA AAAACCTGCA GGAAACGAAG ATAAATCATG TCGAAAGCTA  
12721 CATATAAGGA ACGTGCTGCT ACTCATCCTA GTCCTGTTGC TGCCAAGCTA TTTAATATCA  
12781 TGCACGAAAA GCAAACAAAC TTGTGTGCTT CATTGGATGT TCGTACCACC AAGGAATTAC  
12841 TGGAGTTAGT TGAAGCATTG GGTCCCAAAA TTTGTTTACT AAAAACACAT GTGGATATCT  
12901 TGAATGATTT TTCCATGGAG GGCACAGTTA AGCCGCTAAA GGCATTATCC GCCAAGTACA  
12961 ATTTTTTACT CTTCGAAGAC AGAAAATTTG CTGACATTGG TAATACAGTC AAATTGCAGT  
13021 ACTCTGCGGG TGTATACAGA ATAGCAGAAT GGGCAGACAT TACGAATGCA CACGGTGTGG  
13081 TGGGCCCAGG TATTGTTAGC GGTTTGAAGC AGGCGGCAGA AGAAGTAACA AAGGAACCTA  
13141 GAGGCCTTTT GATGTTAGCA GAATTGTCAT GCAAGGGCTC CCTATCTACT GGAGAAATATA  
13201 CTAAGGGTAC TGTTGACATT GCGAAGAGCG ACAAAGATTT TGTATATCGGC TTTATTGCTC  
13261 AAAGAGACAT GGGTGAAGA GATGAAGGTT ACGATTGGTT GATTATGACA CCCGGTGTGG  
13321 GTTTAGATGA CAAGGGAGAC GCATTGGGTC AACAGTATAG AACCGTGGAT GATGTGGTCT  
13381 CTACAGGATC TGACATTATT ATTGTTGGAA GAGGACTATT TGCAAAGGGA AGGGATGCTA  
13441 AGGTAGAGGG TGAACGTTAC AGAAAAGCAG GCTGGGAAGC ATATTTGAGA AGATGCGGCC  
13501 AGCAAAACTA AAAAAGTGA TTATAAGTAA ATGCATGTAT ACTAAACTCA CAAATTAGAG  
13561 CTTCAATTTA ATTATATCAG TTATTACCC

//

LOCUS pNB2629 7620 bp DNA linear 15-JUN-2012

FEATURES Location/Qualifiers  
misc\_feature 3130..3511  
/note="MET promotor"  
misc\_feature 3544..3894  
/note="MS2 coat protein"  
misc\_feature 3901..4578  
/note="RFP"  
misc\_feature 4585..4821  
/note="Partial CYC1"  
source 1..7620  
/dnas\_title="pNB2629"

ORIGIN

```
1 tcgcgcgctt cggatgatgac ggtgaaaacc tctgacacat gcagctcccg gagacgggtca
61 cagcttgtct gtaagcggat gccgggagca gacaagcccg tcagggcgcg tcagcgggtg
121 ttggcgggtg tcggggctgg cttactatg cggcatcaga gcagattgta ctgagagtgc
181 accatatcga ctacgtcgtg aggccgtttc tgacagagta aaattcttga ggaactttc
241 accattatgg gaaatggttc aagaaggat tgacttaaac tccatcaaat ggtcagggtca
301 ttgagtgttt tttattgttt gtattttttt ttttttagag aaaatcctcc aatatcaaat
361 taggaatcgt agtttcatga ttttctgtta cacctaactt tttgtgtggt gccctcctcc
421 ttgtcaatat taatgttaaa gtgcaattct ttttccttat caggttgagc cattagatc
481 aatttgctta cctgtattcc tttactatcc tcctttttct ccttcttgat aatgtatgt
541 agattgcgta tatagtttcg tctaccctat gaacatattc cattttgtaa ttcgtgtcgc
601 tttctattat gaatttcatt tataaagttt atgtacaaat atcataaaaa aagagaatct
661 tttaagcaa ggattttctt aacttcttcg gcgacagcat caccgacttc ggtggtactg
721 ttggaaccac ctaaatcacc agttctgata cctgcatcca aaaccttttt aactgcatct
781 tcaatggcct taccttcttc aggcaagttc aatgacaatt tcaacatcat tgcagcagac
841 aagatagtgg cgatagggtc aaccttattc tttggcaaat ctggagcaga accgtggcat
901 ggttcgtaca aaccaaagtc ggtgttcttg tctggcaaag aggccaagga cgcagatggc
961 aacaaacca aggaacctgg gataacggag gcttcatcgg agatgatatc accaaacatg
1021 ttgctgggtg ttataatacc atttagggtg gttgggttct taactaggat catggcggca
1081 gaatcaatca attgatgttg aaccttcaat gtagggaatt cgttcttgat ggtttcctcc
1141 acagtttttc tccataatct tgaagaggcc aaaacattag ctttatccaa ggaccaaata
1201 ggcaatggtg gctcatgttg tagggccatg aaagcggcca ttcttgtgat tctttgact
1261 tctggaacgg tgtattgttc actatcccaa gcgacacat caccatcgtc ttcctttctc
1321 ttaccaaagt aaatacctcc cactaattct ctgacaacaa cgaagtcagt accttagca
1381 aattgtggct tgattggaga taagtctaaa agagagtcgg atgcaaagtt acatggtctt
1441 aagttggcgt acaattgaag ttctttacgg attttttagta aacctgttcc aggtctaaca
1501 ctaccggtac cccatttagg accaccaca gcacctaaaca aaacggcatc aaccttcttg
1561 gaggttcca gcgcctcatc tggagtggtg acacctgtag catcगतatgc agcaccacca
1621 attaaatgat ttctgaaatc gaacttgaca ttggaacgaa catcagaat agctttaaga
1681 acctaatgg ctctcggtgt gatttcttga ccaacgtggt cacctggcaa aacgacgatc
1741 ttcttagggg cagacatagg ggcagacatt agaatggtat atccttgaaa tataatatata
1801 tattgctgaa atgtaaaagg taagaaaagt tagaaaagta gacgattgct aaccacctat
1861 tggaaaaaac aataggctct taataatat tgtcaacttc aagtattgtg atgcaagcat
1921 ttagtcatga acgcttctct attctatatg aaaagccggt tccggcctct cacctttcct
1981 ttttctccca atttttcagt tgaaaaaggt atatgctca ggcgacctct gaaattaaca
2041 aaaaatttcc agtcatcgaa tttgattctg tgcgatagcg ccctgtgtg ttctcgttat
2101 gttgagaaa aaaataatgg ttgctaagag attcgaactc ttgcatctta cgatacctga
2161 gtattcccac agttaactgc ggtcaagata tttcttgaat caggcgcctt agaccgctcg
2221 gccaaacaac caattacttg ttgagaata gagtataatt atcctataaa tataacgttt
2281 ttgaacacac atgaacaagg aagtacagga caattgattt tgaagagaat gtggattttg
2341 atgtaattgt tgggattcca tttttaataa ggcaataata ttaggtatgt ggatatacta
2401 gaagttctcc tcgagggctc atatgcggtg tgaaataccg cacagatgcg taaggagaaa
2461 ataccgcatc aggaaattgt aaacgttaat attttgtaa aattcgcggt aaatttttgt
```

2521 taaatcagct ctttttttaa ccaataggcc gaaatcggca aaatccctta taaatcaaaa  
2581 gaatagaccg agatagggtt gagtgttggt ccagtttgga acaagagtcc actattaag  
2641 aacgtggact ccaacgtcaa agggcgaaaa accgtctatc agggcgatgg cccactacgt  
2701 gaaccatcac cctaatacaag ttttttgggg tcgaggtgcc gtaaagcact aaatcggaac  
2761 cctaaaggga gccccgatt tagagcttga cggggaaagc cggcgaacgt ggcgagaaag  
2821 gaagggaaga aagcgaaagg agcgggcgct agggcgctgg caagtgtagc ggtcacgctg  
2881 cgcgtaacca ccacaccgc cgcgcttaat gcgcccgtac agggcgctc gcgccattcg  
2941 ccattcaggc tgcgcaactg ttgggaaggg cgatcgggtc gggcctcttc gctattacgc  
3001 cagctggcga aggggggatg tgctgcaagg cgattaagtt gggtaacgcc agggttttcc  
3061 cagtcacgac gttgtaaaac gacggccagt gaattgtaat acgactcact atagggcgaa  
3121 ttgGAGCTCC GGATGCAAGG GTTCGAATCC CTTAGCTCTC ATTATTTTTT GCTTTTTCTC  
3181 TTGAGGTCAC ATGATCGCAA AATGGCAAAT GGCACGTGAA GCTGTGCATA TTGGGGAAC  
3241 GTGGTGGTTG GCAAATGACT AATTAAGTTA GTCAAGGCGC CATCCTCATG AAAACTGTGT  
3301 AACATAATAA CCGAAGTGTC GAAAAGGTGG CACCTTGTC AATTGAACAC GCTCGATGAA  
3361 AAAAATAAGA TATATATAAG GTTAAGTAAA GCGTCTGTTA GAAAGGAAGT TTTTCTTTT  
3421 TCTTGCTCTC TTGTCTTTTC ATCTACTATT TCCTTCGTGT AATACAGGGT CGTCAGATAC  
3481 ATAGATACAA TTCTATTACC CCCATCCATA CTCTAGAtag agccctcaac cggagtgtga  
3541 agcatggctt ctaactttac tcagttcgtt ctcgtcgaca atggcggaac tggcgacgtg  
3601 actgctgcgcc caagcaactt cgtaacggg atcgctgaat ggatcagctc taactcagct  
3661 tcacagcctt acaaagtaac ctgtagcgtt cgtcagagct ctgcbagaa tcgcaaacatc  
3721 accatcaaaag tcgaggtgcc taaaggcgcc tggcgctcgt acttaaatat ggaactaacc  
3781 attccaatth ttgccacgaa ttccgactgc gagcttattg ttaaggcaat gcaaggtctc  
3841 ctaaaagatg gaaacccgat tccctcagca atcgcagcaa actccggcat ctacGGATCC  
3901 ATGGACAACA CTGAAGACGT TATCAAGGAA TTCATGCAAT TCAAGGTTAG AATGGAAGGT  
3961 TCTGTAAACG GTCACTACTT CGAAATCGAG GCGGAAGGTG AAGGTAAGCC ATACGAAGGT  
4021 ACTCAAACCTG CTAAGTTGCA AGTTACTAAG GGTGGTCCAT TGCCATTTCG TTGGGACATC  
4081 TTGTCTCCAC AATTCCAATA CGGTTCTAAG GCTTACGTTA AACATCCTGC TGACATCCCA  
4141 GACTACATGA AGTTGTCTTT CCCAGAAGGT TTCACATGGG AACGTTCTAT GAACTTCGAA  
4201 GACGGTGGTG TGGTTGAAGT TCAACAAGAT TCTTCTTTGC AAGACGGTAC TTTTATCTAC  
4261 AAGGTTAAGT TCAAGGGTGT TAACTTCCCA GCTGACGGTC CAGTTATGCA AAAGAAGACT  
4321 GCTGGTTGGG AACCGTCTAC CGAAAAGTTG TACCCACAAG ATGGCGTTTT GAAAGGTGAA  
4381 ATCTCTCACG CTTTGAAGTT GAAGGACGGT GGGCACTATA CTTGTGACTT CAAGACTGTT  
4441 TACAAAGCTA AGAAGCCAGT TCAATTGCCA GGTAACCATT ACGTTGACTC TAAGTTGGAC  
4501 ATCACTAACC ACAACGAAGA CTACACTGTT GTTGAACAAT ACGAACACGC TGAAGCTAGA  
4561 CACTCTGGTT CTCAATAGCT CGAGctggtc gagTCATGTA ATTAGTTATG TCACGCTTAC  
4621 ATTCACGCC TCCCCCACA TCCGCTCTAA CCGAAAAGGA AGGAGTTAGA CAACCTGAAG  
4681 TCTAGGTCCC TATTTATTTT TTTATAGTTA TGTTAGTATT AAGAACGTTA TTTATATTTT  
4741 AAATTTTTCT TTTTTTTCTG TACAGACGCG TGTACGCATG TAACATTATA CTGAAAACCT  
4801 TGCTTGAGAA GGTTTTGGGA CGGGCCCggt acccagcttt tgttcccttt agtgagggtt  
4861 aattccgagc ttggcgtaat catggtcata gctgtttcct gtgtgaaatt gttatccgct  
4921 cacaattcca cacaacatag gagccggaag cataaagtgt aaagcctggg gtgcctaag  
4981 agtgaggtaa ctcacattaa ttgcgttgcg ctcactgcc gctttccagt cgggaaacct  
5041 gtcgtgccag ctgcattaa gaatcggcca acgcgcgggg agaggcggtt tgcgtattgg  
5101 gcgctcttcc gcttccctgc tcaactgact gctgcgctcg gtcgttcggc tgcggcgagc  
5161 ggtatcagct cactcaaagg cggtaatagc gttatccaca gaatcagggg ataacgcagg  
5221 aaagaacatg tgagcaaaa ggcagcaaaa ggccaggaac cgtaaaaagg ccgctgtget  
5281 ggcgtttttc cataggctcg gccccctga cgagcatcac aaaaatcgac gctcaagtca  
5341 gaggtggcga aaccgcagag gactataaag ataccaggcg ttccccctt gaagctccct  
5401 cgtgcgctct cctggtccga cctgcccgt taccggatac ctgctccctt ttctccctc  
5461 ggaagcgtg gcgctttctc aatgctcac cctgtagtat ctcagttcgg tgtaggtcgt  
5521 tcgctccaag ctgggctgtg tgcacgaacc cccggttcag cccgaccgct gcgcttatc  
5581 cggtaaactc cgtcttgagt ccaaccggt aagacacgac ttatcgccac tggcagcagc  
5641 cactggtaac aggattagca gagcgaggta tgtaggcgg gctacagagt tcttgaagtg  
5701 gtggcctaac tacggctaca ctagaaggac agtatttggt atctgcgctc tgctgaagcc  
5761 agttacctt ggaaaaagag ttggtagctc ttgatccggc aaacaaacca ccgctggtag

5821 cggtgggtttt tttgtttgca agcagcagat tacgcgcaga aaaaaaggat ctcaagaaga  
5881 tcctttgatc ttttctacgg ggtctgacgc tcagtggaac gaaaactcac gttaagggat  
5941 tttgggtcatg agattatcaa aaaggatcct cacctagatc cttttaaatt aaaaatgaag  
6001 ttttaaataca atctaaagta tatatgagta aacttggctc gacagttacc aatgcttaat  
6061 cagtgaggca cctatctcag cgatctgtct atttcgttca tccatagttg cctgactgcc  
6121 cgtcgtgtag ataactacga tacgggaggg cttaccatct ggccccagtg ctgcaatgat  
6181 accgcgagac ccacgctcac cggctccaga tttatcagca ataaaccagc cagccggaag  
6241 ggccgagcgc agaagtggtc ctgcaacttt atccgcctcc atccagtcta ttaattgttg  
6301 ccgggaagct agagtaagta gttcgccagt taatagtttg cgcaacgttg ttgccattgc  
6361 tacaggcatc gtgggtgtcac gctcgtcgtt tgggatggct tcattcagct ccggttccca  
6421 acgatcaagg cgagttacat gatccccat gttgtgaaaa aaagcggtta gtccttcgg  
6481 tcctccgatc gttgtcagaa gtaagttggc cgcagtgtta tcaactatgg ttatggcagc  
6541 actgcataat tctcttactg tcatgccatc cgtaagatgc ttttctgtga ctggtgagta  
6601 ctcaaccaag tcattctgag aatagtgtat gcggcgaccg agttgctctt gcccggcgtc  
6661 aatacgggat aataccgcgc cacatagcag aactttaaaa gtgctcatca ttggaaaacg  
6721 ttcttcgggg cgaaaactct caaggatcct accgctgttg agatccagtt cgatgtaacc  
6781 cactcgtgca cccaactgat cttcagcatc ttttactttc accagcgttt ctgggtgagc  
6841 aaaaacagga aggcaaaatg ccgcaaaaaa gggaataagg gcgacacgga aatggtgaat  
6901 actcactc ttcctttttc aatattattg aagcatttat cagggttatt gtctcatgag  
6961 cggatacata tttgaaatgta tttagaaaaa taacaaaata ggggttccgc gcacatttcc  
7021 ccgaaaagtg ccacctgggt ctttttcatc acgtgctata aaaataatta taatttaaat  
7081 tttttaatat aaatatataa attaaaaata gaaagtaaaa aaagaaatta aagaaaaaat  
7141 agtttttggt ttccgaagat gtaaaagact ctagggggat cgccaacaaa tactaccttt  
7201 tatcttgctc ttctgtctct caggtattaa tgccgaattg tttcatcttg tctgtgtaga  
7261 agaccacaca cgaaaatcct gtgattttac attttactta tcgttaatcg aatgtataac  
7321 tatttaaatc gcttttcttg tctaataaat atatatgtaa agtacgcttt ttggtgaaat  
7381 tttttaaacc tttgtttatt ttttttctt cattccgtaa ctcttctacc ttctttattt  
7441 actttctaaa atccaaatac aaaacataaa aataaataaa cacagagtaa attcccaaat  
7501 tattccatca ttaaaagata cgaggcgcgt gtaagttaca ggcaagcgat ccgtcctaag  
7561 aaaccattat tatcatgaca ttaacctata aaaaataggcg tatcacgagg ccctttcgtc

//

LOCUS pNB2788 6444 bp DNA linear 15-JUN-2012

FEATURES Location/Qualifiers  
misc\_feature 4287..4533  
/note="CYC1"  
misc\_feature 3378..3998  
/note="CA"  
misc\_feature 3999..4076  
/note="SP"  
misc\_feature 4077..4250  
/note="NC"  
source 1..6444  
/dnas\_title="pNB2788"

ORIGIN

1 GACGAAAGGG CCTCGTGATA CGCCTATTTT TATAGGTTAA TGTCATGATA ATAATGGTTT  
61 CTTAGGACGG ATCGCTTGCC TGTAACCTAC ACGCGCCTCG TATCTTTTAA TGATGGAATA  
121 ATTTGGGAAT TTACTCTGTG TTTATTTTATT TTTATGTTTT GTATTTGGAT TTTAGAAAGT  
181 AAATAAAGAA GGTAGAAGAG TTACGGAATG AAGAAAAAAA AATAAACAAA GGTTAAAAA  
241 ATTTCAACAA AAAGCGTACT TTACATATAT ATTTATTAGA CAAGAAAAGC AGATTAATA  
301 GATATACATT CGATTAACGA TAAGTAAAT TAATAATCAC AGGATTTTCG TGTGTGGTCT  
361 TCTACACAGA CAAGATGAAA CAATTCGGCA TTAATACCTG AGAGCAGGAA GAGCAAGATA  
421 AAAGGTAGTA TTTGTTGGCG ATCCCCCTAG AGTCTTTTAC ATCTTCGAA AACAAAACT  
481 ATTTTTCTT TAATTTCTT TTTTACTTTC TATTTTAAAT TTATATATTT ATATTAAAAA  
541 ATTTAAATTA TAATTATTTT TATAGCACGT GATGAAAAGG ACCCAGGTGG CACTTTTCGG  
601 GGAAATGTGC GCGGAACCCC TATTTGTTTA TTTTCTAAA TACATTCAAA TATGTATCCG  
661 CTCATGAGAC AATAACCCTG ATAAATGCTT CAATAATATT GAAAAAGGAA GAGTATGAGT  
721 ATTCAACATT TCCGTGTCGC CCTTATTCCC TTTTTGCGG CATTTTGCCT TCCTGTTTTT  
781 GCTCACCCAG AAACGCTGGT GAAAGTAAA GATGCTGAAG ATCAGTTGGG TGCACGAGTG  
841 GGTACATCG AACTGGATCT CAACAGCGGT AAGATCCTTG AGAGTTTTCG CCCCAGAGAA  
901 CGTTTTCCAA TGATGAGCAC TTTTAAAGTT CTGCTATGTG GCGCGGTATT ATCCCGTATT  
961 GACGCCGGC AAGAGCAACT CGGTCGCCG ATACACTATT CTCAGAATGA CTTGGTTGAG  
1021 TACTCACCAG TCACAGAAAA GCATCTTACG GATGGCATGA CAGTAAGAGA ATTATGCAGT  
1081 GCTGCCATAA CCATGAGTGA TAACACTGCG GCCAACTTAC TTCTGACAAC GATCGGAGGA  
1141 CCGAAGGAGC TAACCGCTTT TTTTACAAC ATGGGGGATC ATGTAACTCG CCTTGATCGT  
1201 TGGGAACCGG AGCTGAATGA AGCCATACCA AACGACGAGC GTGACACCAC GATGCCTGTA  
1261 GCAATGGCAA CAACGTTGCG CAACTATTA ACTGGCGAAC TACTTACTCT AGCTTCCCAG  
1321 CAACAATTAA TAGACTGGAT GGAGGCGGAT AAAGTTGCAG GACCACTTCT GCGCTCGGCC  
1381 CTTCCGGCTG GCTGGTTTAT TGCTGATAAA TCTGGAGCCG GTGAGCGTGG GTCTCGCGGT  
1441 ATCATTGCAG CACTGGGGCC AGATGGTAAG CCCTCCCGTA TCGTAGTTAT CTACACGACG  
1501 GGCAGTCAGG CAACTATGGA TGAACGAAAT AGACAGATCG CTGAGATAGG TGCCCTACTG  
1561 ATTAAGCATT GGTAAGTGTG AGACCAAGTT TACTCATATA TACTTTAGAT TGATTTAAAA  
1621 CTTCAATTTT AATTTAAAAA GATCTAGGTG AAGATCCTTT TTGATAATCT CATGACCAA  
1681 ATCCCTAAC GTGAGTTTTC GTTCCACTGA GCGTCAGACC CCGTAGAAAA GATCAAAGGA  
1741 TCTTCTGAG ATCCTTTTTT TCTGCGCGTA ATCTGCTGCT TGCAAACAAA AAAACCACCG  
1801 CTACCAGCGG TGGTTTGTG GCCGGATCAA GAGCTACCAA CTCTTTTTCC GAAGGTAAC  
1861 GGCTTCAGCA GAGCGCAGAT ACCAAATACT GTCCTTCTAG TGTAGCCGTA GTTAGGCCAC  
1921 CACTTCAAGA ACTCTGTAGC ACCGCCTACA TACCTCGCTC TGCTAATCCT GTTACCAGTG  
1981 GCTGCTGCCA GTGGCGATAA GTCGTGCTT ACCGGGTGG ACTCAAGACG ATAGTTACC  
2041 GATAAGGCGC AGCGGTGCGG CTGAACGGGG GGTTCGTGCA CACAGCCAG CTTGGAGCGA  
2101 ACACCTACA CCGAAGTGA ATACCTACAG CCGTAGCATT GAGAAAGCGC CACTTTCCTC  
2161 GAAGGGAGAA AGGCGGACAG GTATCCGGTA AGCGGCAGGG TCGGAACAGG AGAGCGCACG  
2221 AGGGAGCTTC CAGGGGGGAA CGCCTGGTAT CTTTATAGTC CTGTGCGGTT TCGCCACCTC  
2281 TGACTTGAGC GTCGATTTTT GTGATGCTCG TCAGGGGGGC CGAGCCTATG GAAAAACGCC  
2341 AGCAACGCGG CCTTTTTTACG GTTCCCTGGC TTTTGCTGGC CTTTTGCTCA CATGTTCTTT  
2401 CCTGCGTTAT CCCCTGATTC TGTGGATAAC CGTATTACCG CTTTTGAGTG AGCTGATACC  
2461 GCTCGCCGCA GCCGAACGAC CGAGCGCAGC GAGTCAGTGA GCGAGGAAGC GGAAGAGCGC

2521 CCAATACGCA AACCGCCTCT CCCC GCGCGT TGGCCGATTC ATTAATGCAG CTGGCACGAC  
2581 AGGTTTCCCG ACTGGAAAGC GGGCAGTGAG CGCAACGCAA TTAATGTGAG TTACCTCACT  
2641 CATTAGGCAC CCCAGGCTTT ACAC TTTATG CTTC CGGCTC CTATGTTGTG TGGAATTGTG  
2701 AGCGGATAAC AATTTACAC AGGAAACAGC TATGACCATG ATTACGCCAA GCTCGGAATT  
2761 AACCTCACT AAAGGGAACA AAAGCTGGGT ACCGGGCCCC CCCTCGAGGT CGACGGTATC  
2821 GATAAGCTTG ATATCGAATT CCTGCAGCCC GGGGGATCCA CTAGTACGGA TTAGAAGCCG  
2881 CCGAGCGGGT GACAGCCCTC CGAAGGAAGA CTCTCCTCCG TCGTCTCCG TCTTCACCGG  
2941 TCGCGTTCCCT GAAACGCAGA TGTGCCTCGC GCCGCACTGC TCCGAACAAT AAAGATTCTA  
3001 CAATACTAGC TTTTATGGTT ATGAAGAGGA AAAATTGGCA GTAACCTGGC CCCACAAACC  
3061 TTCAAATGAA CGAATCAAAAT TAACAACCAT AGGATGATAA TGCGATTAGT TTTT TAGCCT  
3121 TATTTCTGGG GTAATTAATC AGCGAAGCGA TGATTTTGA TCTATTAACA GATATATAAA  
3181 TGCAAAAAC GCATAACCAC TTTAACTAAT ACTTTCACA TTTTCGGTTT GTATTACTTC  
3241 TTATTCAAAT GTAATAAAAAG TATCAACAAA AAATTGTTAA TATACCTCTA TACTTTAACG  
3301 TCAAGGAGAA AAAACCCCGG ATCGGACTAC TAGCAGCTGT AATACGACTC ACTATAGGGA  
3361 ATATTAAGCT TGGTACCATG AGCTTTATGG ATCAAATCCC AGGAGGAGGA AATTATCCAA  
3421 AACTCCAGT AGAATGCCTT CCTAACTTCC CGATCCAACC ATCTTTGACC TTCAGAGGTA  
3481 GAAATGACT GCATAAACTG AAAAACTTTA TCTCCGAAAT AATGTAAAC ATGTCTATGA  
3541 TATCTTGGCC GAATGATGCC AGTCGTATTG TGTACTGCAG AAGACATTTA TTAACCCCG  
3601 CTGCTCAGTG GGCTAATGAC TTTGTATAAG AACAAAGTAT ACTTGAAATA ACATCGACA  
3661 CATTCATACA AGGATTATAT CAGCATTTCT ATAAGCCACC AGATATCAAT AAAATCTTTA  
3721 ATGCAATCAC GCAACTTTCC GAAGCTAAAC TTGGTATTGA GCGTCTCAAC CAACGATTCA  
3781 GAAAGATTTG GGACAGAATG CCACCAGACT TCATGACCGA AAAAGCTGCC ATAATGACAT  
3841 ATACTAGGCT ATTGACAAAAG GAAACCTATA ATATTGTCAG AATGCACAAA CCAGAGACAT  
3901 TAAAAGACGC CATGGAAAGG GCTTACCAGA CAACTGCACT AACTGAAAGA TTCTTCCCAG  
3961 GATTCGAACT TGATGCTGAT GGAGACACTA TCATCGGTGC CACAACCAC TTACAAGAAG  
4021 AATACGACTC TGACTATGAT TCAGAAGATA ATCTGACCCA GAATGGATAC GTCCATACCG  
4081 TAAGGACAAG AAGATCTTAC AATAAACCAA TGTCAAATCA TCGAAACAGG AGAAAATAACA  
4141 ACCCATCTAG AGAAGAATGT AAAAAAATC GGCTATGCTT CTATTGTAAG AAAGAGGGAC  
4201 ATCGCCTGAA CGAATGTAGA GCACGTAAGG CGAGTTCTAA CCGATCTTGA CCCGGGAGCT  
4261 CGGATCCACT AGTTCTAGAG CGGCCGTCAT GTAATTAGTT ATGTCACGCT TACATTCACG  
4321 CCTCCCCC ACATCCGCTC TAACCGAAAA GGAAGGAGTT AGACAACCTG AAGTCTAGGT  
4381 CCTATTTAT TTTTTTATAG TTATGTTAGT ATTAAGAAGC TTATTTATAT TTCAAATTTT  
4441 TCTTTTTTTT CTGTACAGAC GCGTGTACGC ATGTAACATT ATACTGAAAA CCTTGCTTGA  
4501 GAAGTTTTTG GGACGCTCGA AGGCTTTAAT TTGCGGCCGC CACCGCGGTG GAGCTCCAAT  
4561 TCGCCCTATA GTGAGTCGTA TTACAATTCA CTGGCCGTCG TTTTACAACG TCGTGACTGG  
4621 GAAAACCCTG GCGTTACCCA ACTTAATCGC CTTGCAGCAC ATCCCCCTT CGCCAGCTGG  
4681 CGTAATAGCG AAGAGGCCCC CACCGATCGC CCTTCCAAC AGTTGCGCAG CCTGAATGGC  
4741 GAATGGCGCG ACGCGCCCTG TAGCGGCGCA TTAAGCGCGG CGGGTGTGGT GGTTACGCGC  
4801 AGCGTGACCG CTACACTTGC CAGCGCCCTA GCGCCCCTC CTTTCGCTTT CTTCCTTCC  
4861 TTTCTCGCCA CGTTCGCCGG CTTTCCCCGT CAAGCTCTAA ATCGGGGCT CCTTTAGGG  
4921 TTCCGATTTA GTGCTTTACG GCACCTCGAC CCCAAAAAAC TTGATTAGGG TGATGGTTCA  
4981 CGTAGTGGGC CATCGCCCTG ATAGACGGTT TTTGCCCCCT TGACGTTGGA GTCCACGTTT  
5041 TTTAATAGTG GACTCTTGTT CCAAACCTGGA ACAACACTCA ACCCTATCTC GGTCTATTCT  
5101 TTTGATTTAT AAGGGATTTT GCCGATTTTCG GCCTATTGGT TAAAAAATGA GCTGATTTAA  
5161 CAAAAATTTA ACGCGAATTT TAACAAAATA TTAACGTTTA CAATTTCTCTG ATGCGGTATT  
5221 TTCTCCTTAC GCATCTGTGC GGTATTTTAC ACCGCAGGCA AGTGCACAAA CAATACTTAA  
5281 ATAAATACTA CTCAGTAATA ACCTATTTCT TAGCATTTT GACGAAATTT GCTATTTTGT  
5341 TAGAGTCTTT TACACCATTT GTCTCCACAC CCGCTTAC ATCAACACCA ATAACGCCAT  
5401 TTAATCTAAG CGCATCACCA ACATTTTCTG CCGTCAGTCC ACCAGCTAAC ATAAAAATGTA  
5461 AGCTTTTCGG GCTCTCTTGC CTTCCAACCC AGTCAGAAAT CGAGTTCCAA TCCAAAAGTT  
5521 ACCCTGTCCC ACCTGCTTCT GAATCAAACA AGGGAATAAA CGAATGAGGT TTCTGTGAAG  
5581 CTGCACTGAG TAGTATGTTG CAGTCTTTTG GAAATACGAG TCTTTTAATA ACTGGCAAAC  
5641 CGAGGAACTC TTGGTATTCT TGCCACGACT CATCTCCATG CAGTTGGACG ATATCAATGC  
5701 CGTAATCATT GACCAGAGCC AAAACATCCT CCTTAGGTTG ATTACGAAAC ACGCCAACCA  
5761 AGTATTTCCG AGTGCCTGAA CTATTTTTAT ATGCTTTTAC AAGACTTGAA ATTTTCCTTG

5821 CAATAACCGG GTCAATTGTT CTCTTTCTAT TGGGCACACA TATAATACCC AGCAAGTCAG  
5881 CATCGGAATC TAGAGCACAT TCTGCGGCCT CTGTGCTCTG CAAGCCGCAA ACTTTCACCA  
5941 ATGGACCAGA ACTACCTGTG AAATTAATAA CAGACATACT CCAAGCTGCC TTTGTGTGCT  
6001 TAATCACGTA TACTCACGTG CTCAATAGTC ACCAATGCC TCCCTCTTGG CCCTCTCCTT  
6061 TTCTTTTTTTC GACCGAATTA ATTCTTAATC GGCAAAAAA GAAAAGCTCC GGATCAAGAT  
6121 TGTACGTAAG GTGACAAGCT ATTTTTCAAT AAAGAATATC TTCCACTACT GCCATCTGGC  
6181 GTCATAACTG CAAAGTACAC ATATATTACG ATGCTGTCTA TTAAATGCTT CCTATATTAT  
6241 ATATATAGTA ATGTCGTTTA TGGTGCACCTC TCAGTACAAT CTGCTCTGAT GCCGCATAGT  
6301 TAAGCCAGCC CCGACACCCG CCAACACCCG CTGACGCGCC CTGACGGGCT TGTCTGCTCC  
6361 CGGCATCCGC TTACAGACAA GCTGTGACCG TCTCCGGGAG CTGCATGTGT CAGAGGTTTT  
6421 CACCGTCATC ACCGAAACGC GCGA

//



LOCUS pNB2995 10560 bp DNA linear 15-JUN-2012

FEATURES Location/Qualifiers  
misc\_feature 394..399  
/note="transcription start site"  
misc\_feature 1..451  
/note="GAL1"  
misc\_feature 507..516  
/note="translation initiation sequence"  
misc\_feature 517..1137  
/note="Capsid"  
CDS 517..1137  
/note=""  
/translation="MSFMDQIPGGGNYPKLPVECLPNFPIQPSLTFRGRNDSHKLKNF  
ISEIMLNMSMISWPNDASRIVYCRRLNPAQWANDFVQEQGILEITFDTFIQGLYQ  
HFYKPPDINKIFNAITQLSEAKLGIERLNQRFKRWDRMPPDFMTEKAAIMTYTRLLT  
KETYNIVRMHKPETLKDAMEEAYQTTALTERFFPGFELDADGDTIIG"  
misc\_feature 1138..1215  
/note=""  
CDS 1138..1215  
/note=""  
/translation="ATTHLQEEYDSYDSEDNLTQNGYVH"  
misc\_feature 1216..1374  
/note="Nucleocapsid"  
CDS 1216..1374  
/note=""  
/translation="TVRTRRSYNKPMNSHRNRNRRNNPSREECIKNRLCFYCKKEGHRL  
NECRARKASSNRS"  
misc\_feature 1374..1375  
/note="A T was deleted between this T-C to remove the  
frameshift"  
misc\_feature 1389..5157  
/note="POL3"  
misc\_feature 5112..5157  
/note="U3"  
misc\_feature 1376..1388  
/note="Nucleocapsid"  
CDS 1376..1388  
/note=""  
/translation=""  
misc\_feature 5160..5228  
/note="MS2 sequence"  
misc\_feature 5312..5559  
/note="CYC terminator"  
misc\_feature 5479..5485  
/note="transcription end"  
source 1..10560  
/dnas\_title="pNB2995"

ORIGIN

```
1  ACGGATTAGA AGCCGCCGAG CGGGTGACAG CCCTCCGAAG GAAGACTCTC CTCCGTGCGT
61 CCTCGTCTTC ACCGGTCGCG TTCCTGAAAC GCAGATGTGC CTCGCGCCGC ACTGCTCCGA
121 ACAATAAAGA TTCTACAATA CTAGCTTTTA TGGTTATGAA GAGGAAAAAT TGGCAGTAAC
181 CTGGCCCCAC AAACCTTCAA ATGAACGAAT CAAATTAACA ACCATAGGAT GATAATGCGA
241 TTAGTTTTTTT AGCCTTATTT CTGGGGTAAT TAATCAGCGA AGCGATGATT TTTGATCTAT
301 TAACAGATAT ATAAATGCAA AAACCTGCATA ACCACTTTAA CTAATACTTT CAACATTTTC
361 GGTTTGTATT ACTTCTTATT CAAATGTAAT AAAAGTATCA ACAAATAATT GTTAATATAC
```

|      |             |             |            |             |            |             |
|------|-------------|-------------|------------|-------------|------------|-------------|
| 421  | CTCTATACTT  | TAACGTCAAG  | GAGAAAAAAC | CCCGGATCGG  | ACTACTAGCA | GCTGTAATAC  |
| 481  | GACTCACTAT  | AGGGAATATT  | AAGCTTACAC | CCCAGTATGA  | GCTTTATGGA | TCAAATCCCA  |
| 541  | GGAGGAGGAA  | ATTATCCAAA  | ACTCCCAGTA | GAATGCCTTC  | CTAACTTCCC | GATCCAACCA  |
| 601  | TCTTTGACCT  | TCAGAGGTAG  | AAATGACTCG | CATAAACTGA  | AAAACTTTAT | CTCCGAAATA  |
| 661  | ATGTTAAACA  | TGTCTATGAT  | ATCTTGGCCG | AATGATGCCA  | GTCGTATTGT | GTACTIONGAG |
| 721  | AGACATTTAT  | TAAACCCCGC  | TGCTCAGTGG | GCTAATGACT  | TTGTACAAGA | ACAAGGTATA  |
| 781  | CTTGAAATAA  | CATTTCGACAC | ATTCATACAA | GGATTATATC  | AGCATTTCTA | TAAGCCACCA  |
| 841  | GATATCAATA  | AAATCTTTAA  | TGCAATCACG | CAACTTTCCG  | AAGCTAAACT | TGGTATTGAG  |
| 901  | CGTCTCAACC  | AACGATTCAG  | AAAGATTTGG | GACAGAAATGC | CACCAGACTT | CATGACCGAA  |
| 961  | AAAGCTGCCA  | TAATGACATA  | TACTAGGCTA | TTGACAAAAGG | AAACCTATAA | TATTGTCCAGA |
| 1021 | ATGCACAAAC  | CAGAGACATT  | AAAAGACGCC | ATGGAAGAGG  | CTTACCAGAC | AACTGCACCTA |
| 1081 | ACTGAAAGAT  | TCTTCCCAGG  | ATTCGAACTT | GATGCTGATG  | GAGACACTAT | CATCGGTGCC  |
| 1141 | ACAACCCACT  | TACAAGAAGA  | ATACGACTCT | GACTATGATT  | CAGAAGATAA | TCTGACCCAG  |
| 1201 | AATGGATACG  | TCCATACCGT  | AAGGACAAGA | AGATCTTACA  | ATAAACCAAT | GTCAAATCAT  |
| 1261 | CGAAACAGGA  | GAAATAACAA  | CCCATCTAGA | GAAGAATGTA  | TAAAAAATCG | GCTATGCCTC  |
| 1321 | TATTGTAAAGA | AAGAGGGACA  | TCGCCTGAAC | GAATGTAGAG  | CACGTAAGGC | GAGCTAACC   |
| 1381 | GATCTTGAAC  | TCGAATCAAA  | AGACCAACAA | ACTCCTTTTA  | TCAAAACCTT | ACCAATTGTA  |
| 1441 | CACTATATCG  | CCATCCCCGA  | GATGGCAAT  | ACCGCCGAAA  | AAACCATAAA | AATACAAAAC  |
| 1501 | ACGAAAGTAA  | AAACCCGTGT  | TGACAGTGG  | TCACCCACGT  | CATTTATCCG | AAGAGATATT  |
| 1561 | GTAGAACTTC  | TCAAATACGA  | AATCTACGAG | ACCCCTCCAC  | TCCGTTTTAG | AGGATTCGTA  |
| 1621 | GCCACCAAAT  | CCGCCGTAC   | ATCCGAAGCA | GTCACCATTG  | ACCTCAAAAT | CAATGACCTG  |
| 1681 | CATATAACTT  | TAGCCGCGTA  | CATACTGGAT | AACATGGACT  | ACCAATTGTT | AATTGGAAAT  |
| 1741 | CCAATCTTAC  | GCCGCTACCC  | GAAAATCCTG | CACACAGTAC  | TGAATACCAG | AGAGAGCCCC  |
| 1801 | GACTCCTTAA  | AGCCCAAGAC  | TTATCGCTCC | GAAAACCGTTA | ATAACGTTAG | AACCTACTCC  |
| 1861 | GCTGGTAATC  | GTGGTAACCC  | CAGAAACATA | AAACTGTCTT  | TTGCCCCAC  | CATTCTCGAA  |
| 1921 | GCAACTGACC  | CGAAATCCGC  | TGGTAATCGT | GGTGACTCCA  | GAACCAAAAC | CCTGTCTCTT  |
| 1981 | GCAACCACTA  | CTCCTGCAGC  | AATTGACCCG | CTTACGACCC  | TTGATAACCC | AGGTAGTACT  |
| 2041 | CAAAGTACAT  | TTGCGCAATT  | CCCATACTT  | GAAGAAGCGA  | GCATCCTAGA | AGAGGATGGA  |
| 2101 | AAATACTCCA  | ACGTTGTCTC  | AACCATTGAG | AGTGTAGAAC  | CTAATGCTAC | TGATCACAGC  |
| 2161 | AATAAGGACA  | CCTTTTGCAC  | TTTGCCAGTT | TGGTTACAAC  | AGAAGTATAG | AGAGATCATA  |
| 2221 | CGTAATGATC  | TCCCACCAAG  | ACCTGCCGAC | ATTAATAACA  | TCCCCGTAAA | ACATGATATT  |
| 2281 | GAAATTA AAC | CTGGCGCAAG  | ACTACCTCGA | CTACAGCCAT  | ACCATGTTAC | AGAAAAGAAC  |
| 2341 | GAACAAGAAA  | TCAACAAAAT  | AGTTCAAAAA | CTGCTCGATA  | ACAAGTTCAT | TGTTCCCTCA  |
| 2401 | AAGTCGCCTT  | GCAGCTCCCC  | TGTAGTCCTC | GTCCCGAAGA  | AAGACGGTAC | CTTCCGACTC  |
| 2461 | TGCGTGCATT  | ACCGCACCCCT | GAACAAAGCT | ACCATCTCCG  | ACCCATTCCC | ATTACCCAGA  |
| 2521 | ATCGACAACC  | TATTGAGCCG  | TATTGGAAAT | GCCCAGATAT  | TTACCACGCT | AGATTTGCAT  |
| 2581 | AGTGGTTACC  | ACCAGATCCC  | GATGGAACCC | AAAGACCGCT  | ACAAAACCGC | CTTTGTCCACA |
| 2641 | CCATCCGGTA  | AGTATGAATA  | TACCGTCATG | CCATTTGGCT  | TAGTCAATGC | ACCTAGTACA  |
| 2701 | TTGCAAGAT   | ACATGGCTGA  | TACATTTAGA | GACCTGAGAT  | TCGTCAATGT | TTACCTTGAT  |
| 2761 | GATATATTAA  | TATTCTCCGA  | ATCTCCAGAA | GAACATTGGA  | AACATTTAGA | CACGGTACTA  |
| 2821 | GAAAGATTAA  | AGAACGAGAA  | CCTCATTGTT | AAGAAGAAAA  | AATGTAAATT | TGCATCTGAA  |
| 2881 | GAAACTGAGT  | TTTTAGGCTA  | TAGTATTGGA | ATCCAGAAAA  | TAGCTCCACT | ACAGCACAAA  |
| 2941 | TGTGCAGCAA  | TCCGAGACTT  | TCCGACGCCT | AAAACAGTAA  | AACAAGCACA | GAGATTTTTA  |
| 3001 | GGAATGATTA  | ATTACTACAG  | ACGATTGATT | CCAAATTGCT  | CCAAGATTGC | ACAGCCAATC  |
| 3061 | CAACTGTTTA  | TTTGTGACAA  | AAGTCAATGG | ACAGAAAAAC  | AAGACAAGGC | AATTGATAAA  |
| 3121 | CTAAAAGACG  | CCTTGTGTAA  | CTCCCCCGTC | CTAGTACCAT  | TCAACAACAA | AGCAAACCTAC |
| 3181 | CGACTTACAA  | CAGACGCCTC  | AAAAGACGGC | ATTGGTGCTG  | TTCTAGAAGA | AGTCGACAAC  |
| 3241 | AAGAACAAC   | TTGTTGGTGT  | CGTCGGTTAC | TTCTCTAAAT  | CCTTAGAGAG | TGCCAGAAA   |
| 3301 | AACATACCTG  | CTGGCGAATT  | AGAACTACTT | AGAAATTATCA | AAGCACTCCA | CCACTCCGA   |
| 3361 | TATATGCTTC  | ACGGAAAGCA  | TTTCACGTTA | GAAACAGACC  | ACATTAGTTT | GTTATCATT   |
| 3421 | CAAAACAAGA  | ACGAACCCGA  | CGAACGCGTG | CAACGCTGGT  | TAGATGACCT | AGCCACATAT  |
| 3481 | GACTTACCT   | TAGAATACCT  | AGCTGGACCC | AAGAACGTTG  | TCGCAGATGC | CATATCCCGT  |
| 3541 | GCCGTATATA  | CTATAACCCC  | CGAAACATCC | CGACCTATCG  | ACACAGAAAG | CTGGAAATCT  |
| 3601 | TACTACAAAT  | CAGACCCATT  | ATGTAGTGCT | GTCTTAATTC  | ATATGAAAGA | ATTGACACAA  |
| 3661 | CACAACGTCA  | CACCTGAAGA  | TATGTCAGCC | TTCCGTAGTT  | ACCAGAAGAA | ACTCGAACTA  |

3721 TCAGAGACCT TCCGAAAGAA TTATTCCCTA GAAGACGAAA TGATCTATTA CCAAGACCGA  
3781 CTAGTAGTAC CAATAAAACA ACAGAACGCA GTTATGAGAC TATATCATGA CCATACCTTA  
3841 TTTGGAGGAC ATTTTGGTGT AACAGTGACC CTTGCGAAAA TCAGCCCAAT TTACTATTGG  
3901 CCAAATTAC AACATTTCGAT CATAACAATC ATCAGGACCT GCGTACAATG TCAACTAATA  
3961 AAATCACACC GACCACGCTT ACATGGACTA TTACAACCAC TCCCTATAGC AGAAGGAAGA  
4021 TGGCTTGATA TATCAATGGA TTTTGTGACA GGATTACCCC CGACATCAAA TAACTTGAAT  
4081 ATGATCCTCG TCGTAGTTGA TCGTTTTTTCG AAACGCGCTC ACTTCATAGC TACAAGGAAA  
4141 ACCTTAGACG CAACACAACCT AATAGATCTA CTCTTTTCGAT ACATTTTTTTC ATATCATGGT  
4201 TTTCCCAGGA CAATAACCAG TGATAGAGAT GTCCGTATGA CCGCCGACAA ATATCAAGAA  
4261 CTCACGAAAA GACTAGGAAT AAAATCGACA ATGTCTTCCG CGAACCACCC CCAACAGAT  
4321 GGACAATCCG AACGAACGAT ACAGACATTA AACAGGTTAC TAAGAGCCTA TGCTTCAACC  
4381 AATATTCAGA ATTTGGCATGT ATATTTACCA CAAATCGAAT TTGTTTACAA TTCTACACCT  
4441 ACTAGAACAC TTGGAAAAATC ACCATTTGAA ATTGATTTAG GATATTTACC GAATACCCCT  
4501 GCTATTAAGT CAGATGACGA AGTCAACGCA AGAAGTTTTA CTGCCGTAGA ACTTGCCAAA  
4561 CACCTCAAAG CCCTTACCAT CCAAACGAAG GAACAGCTAG AACACGCTCA AATCGAAATG  
4621 GAAACTAATA ACAATCAAAG ACGTAAACCC TTATTGTTAA ACATAGGAGA TCACGTATTA  
4681 GTGCATAGAG ATGCATACTT CAAGAAAGGT GCTTATATGA AAGTACAACA AATATACGTC  
4741 GGACCATTTC GAGTTGTCAA GAAAATAAAC GATAACGCCT ACGAACTAGA TTTAAACTCT  
4801 CACAAGAAAA AGCACAGAT TATTAATGTA CAATTCCTGA AAAAGTTTGT ATACCCTCCA  
4861 GACGCGTACC CAAAGAATAA ACCAATCAGC TCCACTGAAA GAATTAAGAG AGCACGCAA  
4921 GTTACTGCAC TCATAGGAAT AGATACTACA CACAAAACCT ACTTATGTCA CATGCAAGAT  
4981 GTAGACCCAA CACTTTCAGT AGAATACTCA GAAGCTGAAT TTTGCCAAAT TCCCGAAAGA  
5041 ACACGAAGAT CAATATTAGC CAACTTTAGA CAACTCTACG AAACACAAGA CAACCCTGAG  
5101 AGAGAGGAAG ATGTTGTATC TCAAAATGAG ATATGTCAGT ATGACAATAC GTCACCCGGC  
5161 TGAACATGAG GATCACCCAT GTCTGCGGTC GACTCTAGAA ACATGAGGAT CACCCATGTC  
5221 CGGGATCCAC TAGTAACGGC CGCCAGTGTG CTGGAAATCT GCAGATATCC ATCACACTGG  
5281 CGGCCGCTCG AGCATGCATC TAGAGGGCCG CATCATGTAA TTAGTTATGT CACGCTTACA  
5341 TTCACGCCCT CCCCCACAT CCGCTCTAAC CGAAAAGGAA GGAGTTAGAC AACCTGAAGT  
5401 CTAGGTCCTT ATTTATTTTT TTATAGTTAT GTTAGTATTA AGAACGTTAT TTATATTTCA  
5461 AATTTTTCTT TTTTTTCTGT ACAGACGCGT GTACGCATGT AACATTATAC TGAAAACCTT  
5521 GCTTGAGAAG GTTTTGGGAC GCTCGAAGGC TTTAATTTGC GGCCCTGCAT TAATGAATCG  
5581 GCCAACGCGC GGGGAGAGGC GGTTTGCCTA TTGGGCGCTC TTCGCTTCC TCGCTACTG  
5641 ACTCGCTGCG CTCGGTCTGT CGGCTGCGGC GAGCGGTATC AGCTCACTCA AAGGCGGTAA  
5701 TACGGTTATC CACAGAATCA GGGGATAACG CAGGAAAGAA CATGTGAGCA AAAGGCCAGC  
5761 AAAAGCCCAG GAACCGTAAA AAGGCCGCGT TGCTGGCGTT TTTCCATAGG CTCCGCCCCC  
5821 CTGACGAGCA TCACAAAAAT CGACGCTCAA GTCAGAGGTG GCGAAACCCG ACAGGACTAT  
5881 AAAGATACCA GGCGTTTCCC CCTGGAAGCT CCCTCGTGCG CTCTCCTGTT CCGACCCTGC  
5941 CGCTTACCGG ATACCTGTCC GCCTTTCTCC CTTCGGGAAG CGTGGCGCTT TCTCATAGCT  
6001 CACGCTGTAG GTATCTCAGT TCGGTGTAGG TCGTTTCGTC CAAGCTGGGC TGTGTGCACG  
6061 AACCCCCCGT TCAGCCCCGAC CGCTGCGCCT TATCCGGTAA CTATCGTCTT GAGTCCAACC  
6121 CGGTAAGACA CGACTTATCG CCACTGGCAG CAGCCACTGG TAACAGGATT AGCAGAGCGA  
6181 GGTATGTAGG CGGTGCTACA GAGTCTTGA AGTGGTGGCC TAACTACGGC TACACTAGAA  
6241 GGACAGTATT TGGTATCTGC GCTCTGCTGA AGCCAGTTAC CTTCCGAAAA AGAGTTGGTA  
6301 GCTCTTGATC CGGCAAAACA ACCACCGCTG GTAGCGGTGG TTTTTTTGTT TGCAAGCAGC  
6361 AGATTACGCG CAGAAAAAAA GGATCTCAAG AAGATCCTTT GATCTTTTCT ACGGGGTCTG  
6421 ACGCTCAGTG GAACGAAAAC TCACGTTAAG GGATTTTGGT CATGAGATTA TCAAAAAGGA  
6481 TCTTCACCTA GATCCTTTTA AATTAATAAT GAAGTTTAA ATCAATCTAA AGTATATATG  
6541 AGTAAACTTG GTCTGACAGT TACCAATGCT TAATCAGTGA GGCACATACT TCACGCATCT  
6601 GTCATTTTCG TTCATCCATA GTTGCCTGAC TCCCCGTCGT GTAGATAACT ACGATAAGGG  
6661 AGCGTTTACC ATCTGGCCCC AGTGCTGCAA TGATACCGCG AGACCCACGC TCACCGGCTC  
6721 CAGATTTATC AGCAATAAAC CAGCCAGCCG GAAGGGCCGA GCGCAGAAGT GGTCTGCAA  
6781 CTTTATCCGC CTCCATTAGC TCTATTAATT GTTGCCGGGA AGCTAGAGTA AGTAGTTCGC  
6841 CAGTTAATAG TTTGCGCAAC GTTGTGGCA TTGCTACAGG CATCGTGGTG TCACTCTCGT  
6901 CGTTTGGTAT GGCTTCATTC AGCTCCGGTT CCAACGATC AAGGCGAGTT ACATGATCCC  
6961 CCATGTTGTG CAAAAAAGCG GTTAGCTCCT TCGGTCCCTC GATCGTTGTC AGAAGTAAGT

7021 TGGCCGCAGT GTTATCACTC ATGGTTATGG CAGCACTGCA TAATTCTCTT ACTGTCATGC  
7081 CATCCGTAAG ATGCTTTTCT GTGACTGGTG AGTACTCAAC CAAGTCATTC TGAGAATAGT  
7141 GTATGCGGCG ACCGAGTTGC TCTTGCCCGG CGTCAATACG GGATAATAGT GTATCACATA  
7201 GCAGAACTTT AAAAGTGCTC ATCATTGGAA AACGTTCTTC GGGGCGAAAA CTCTCAAGGA  
7261 TCTTACCGCT GTTGAGATCC AGTTCGATGT AACCCACTCG TGCACCCAAC TGATCTTCAG  
7321 CATCTTTTAC TTTCACCAGC GTTTCTGGGT GAGCAAAAAC AGGAAGGCAA AATGCCGCAA  
7381 AAAAGGGAAT AAGGGCGACA CGGAAATGTT GAATACTCAT ACTCTTCCTT TTTCAATGGG  
7441 TAATAACTGA TATAATTAAA TTGAAGCTCT AATTTGTGAG TTTAGTATAC ATGCATTTAC  
7501 TTATAATACA GTTTTTTAGT TTTGCTGGCC GCATCTTCTC AAATATGCTT CCCAGCCTGC  
7561 TTTTCTGTAA CGTTCACCCCT CTACCTTAGC ATCCCTTCCC TTTGCAAATA GTCCCTTTC  
7621 AACATAATA ATGTCAGATC CTGTAGAGAC CACATCATCC ACGGTTCTAT ACTGTTGACC  
7681 CAATGCGTCT CCCTTGTCAT CTAAACCCAC ACCGGGTGTC ATAATCAACC AATCGTAACC  
7741 TTCATCTCTT CCACCCATGT CTCTTTGAGC AATAAAGCCG ATAACAAAAT CTTTGTGCGT  
7801 CTTGCAATG TCAACAGTAC CCTTAGTATA TTCTCCAGTA GATAGGGAGC CCTTGCATGA  
7861 CAATTCTGCT AACATCAAAA GGCCTCTAGG TTCTTTGTT ACTTCTTCTG CCGCTGCTT  
7921 CAAACCGCTA ACAATACCTG GGCCCACCAC ACCGTGTGCA TTCGTAATGT CTGCCATTC  
7981 TGCTATTCTG TATACACCCG CAGAGTACTG CAATTTGACT GTATTACCAA TGTACGAAA  
8041 TTTTCTGTCT TCGAAGAGTA AAAAATTGTA CTTGGCGGAT AATGCCTTTA CGCGCTTAA  
8101 TGTGCCCTCC ATGGAAAAAT CAGTCAAGAT ATCCACATGT GTTTTTAGTA AACAAAATTT  
8161 GGGACCTAAT GCTTCAACTA ACTCCAGTAA TTCCCTGGTG GTACGAACAT CCAATGAAGC  
8221 ACACAAGTTT GTTTGCTTTT CGTGCATGAT ATTAATAGC TTGGCAGCAA CAGGACTAGG  
8281 ATGAGTAGCA GCACGTTCC TATATGTAGC TTTTCGACAT ATTTATCTTC GTTTCCTGCA  
8341 GGTTTTTGTT CTGTGCAGTT GGGTTAAGAA TACTGGGCAA TTTTATGTTT CTTCAACACT  
8401 ACATATGCGT ATATATACCA ATCTAAGTCT GTGCTCCTTC CTTGTTCTT CCTTCTGTTT  
8461 GGAGATTACC GAATCAAAAA AATTTCAAAG AAACCGAAAT CAAAAAAAAG AATAAAAAAA  
8521 AAATGATGAA TTGAATTGAA AAGCTAGCTT ATCGATGATA AGCTGTCAAA GATGAGAATT  
8581 AATTCACCG ACTATAGACT ATACTAGATA CTCCGCTAC TGTACGATAC ACTTCCGCTC  
8641 AGGTCCTTGT CCTTTAACGA GGCCTTACCA CTCTTTGTT ACTCTATTGA TCCAGCTCAG  
8701 CAAAGGCAGT GTGATCTAAG ATTCTATCTT CGCGATGTAG TAAACTAGC TAGACCGAGA  
8761 AAGAGACTAG AAATGCAAAA GGCACCTCTA CAATGGCTGC CATCATTATT ATCCGATGTG  
8821 ACGCTGCAGC TTCTCAATGA TATTCGAATA CGCTTTGAGG AGATACAGCC TAATATCCGA  
8881 CAACTGTTT TACAGATTTA CGATCGTACT TGTTACCCAT CATTGAATTT TGAACATCCG  
8941 AACCTGGGAG TTTTCCCTGA AACAGATAGT ATATTTGAAC CTGTATAATA ATATATAGTC  
9001 TAGCGCTTTA CGGAAGACAA TGTATGTATT TCGGTTCCCTG GAGAACTAT TGCATCTATT  
9061 GCATAGGTAA TCTTGCACGT CGCATCCCCG GTTCATTTTC TGCCTTTCCA TCTTGCACCT  
9121 CAATAGCATA TCTTTGTTAA CGAAGCATCT GTGCTTCATT TTGTAGAACA AAAATGCAAC  
9181 GCGAGAGCGC TAATTTTTCA AACAAAGAAT CTGAGCTGCA TTTTACAGA ACAGAAATGC  
9241 AACGCGAAAG CGCTATTTTA CCAACGAAGA ATCTGTGCTT CATTTTTGTA AAACAAAAT  
9301 GCAACGCGAC GAGAGCGCTA ATTTTTCAA CAAAGAATCT GAGCTGCATT TTTACAGAAC  
9361 AGAAATGCAA CGCGAGAGCG CTATTTTACC AACAAAGAAT CTATACTTCT TTTTGTTCCT  
9421 AAAAAATGC ATCCCAGAG CGCTATTTTT CTAACAAAGC ATCTTAGATT ACTTTTTTTC  
9481 TCCTTTGTGC GCTCTATAAT GCAGTCTCTT GATAACTTTT TGCCTGTAG GTCCGTTAAG  
9541 GTTAGAAGAA GGCTACTTTG GTGTCTATTT TCTCTCCAT AAAAAAGCC TGACTCCACT  
9601 TCCCGCCTTT ACTGATTACT AGCGAAGCTG CGGGTGCATT TTTTCAAGAT AAAGGCATCC  
9661 CCGATTATAT TCTATACCGA TGTGGATTGC GCATACTTTG TGAACAGAAA GTGATAGCGT  
9721 TGATGATTCT TCATTGGTCA GAAAATTATG AACGGTTCT TCTATTTTGT CTCTATATAC  
9781 TACGTATAG AAATGTTTAC ATTTTCGTAT TGTTTTCGAT TCACTTATG AATAGTTCTT  
9841 ACTACAATTT TTTTGTCTAA AGAGTAATAC TAGAGATAAA CATAAAAATG GTAGAGTTCG  
9901 AGTTTAGATT CAAGTTCAAG GAGCGAAAGG TGGATGGGTA GGTTATATAG GGATATAGCA  
9961 CAGAGATATA TAGCAAAGAG ATACTTTTGA GCAATGTTTG TGGAAGCGGT ATTCGCAATG  
10021 GGAAGCTCCA CCCCAGTTGA TAATCAGAAA AGCCCCAAAA ACAGGAAGAT TGTATAAGCA  
10081 AATATTTAAA TTGTAAACGT TAATATTTTG TTAAAAATCG CGTTAAATTT TTGTAAATC  
10141 AGCTCATTTT TTAACGAATA GCCCGAAATC GGCAAAATCC CTTATAAATC AAAAGAATAG  
10201 ACCGAGATAG GGTTGAGTGT TGTTCAGTT TCCAACAAGA GTCCACTATT AAAGAACGTG  
10261 GACTCCAACG TCAAAGGGCG AAAAAGGGTC TATCAGGGCG ATGGCCACT ACGTGAACCA

10321 TCACCCTAAT CAAGTTTTTT GGGGTCGAGG TGCCGTAAAG CAGTAAATCG GAAGGGTAAA  
10381 CGGATGCCCC CATTAGAGC TTGACGGGGA AAGCCGGCGA ACGTGGCGAG AAAGGAAGGG  
10441 AAGAAAGCGA AAGGAGCGGG GGCTAGGGCG GTGGGAAGTG TAGGGGTCAC GCTGGGCGTA  
10501 ACCACCACAC CCGCCGCGCT TAATGGGGCG CTACAGGGCG CGTGGGGATG ATCCACTAGT

//

LOCUS pNB2996 9888 bp DNA linear 15-JUN-2012

FEATURES Location/Qualifiers  
misc\_feature 394..399  
/note="transcription start site"  
misc\_feature 1..451  
/note="GAL1"  
misc\_feature 513..522  
/note="translation intiation sequence"  
misc\_feature 523..1143  
/note="Capsid"  
CDS 523..1143  
/note=""  
/translation="MSFMDQIPGGGNYPKLPVECLPNFPIQPSLTFRGRNDSHKLKNF  
ISEIMLNMSMISWPNDASRIVYCRRLNPAQWANDFVQEQGILEITFDTFIQGLYQ  
HFYKPPDINKIFNAITQLSEAKLGIERLNQFRKIWDRMPPDFMTEKAAIMTYTRLLT  
KETYNIVRMHKPETLKDAMEEAYQTTALTERFFPGFELDADGDTIIG"  
misc\_feature 1144..1221  
/note=""  
CDS 1144..1221  
/note=""  
/translation="ATTHLQEEYDSYDSEDNLTQNGYVH"  
misc\_feature 1222..1395  
/note="Nucleocapsid"  
CDS 1222..1395  
/note=""  
/translation="TVRTRRSYNKPMNSNHRNRRNNNPSREECIKNRLCFYCKKEGHRL  
NECRARKASSNRS"  
misc\_feature 1402..4476  
/note="LacZ"  
misc\_feature 4488..4556  
/note="MS2 sequence"  
misc\_feature 4640..4887  
/note="CYC terminator"  
misc\_feature 4807..4813  
/note="transcription end"  
source 1..9888  
/dnas\_title="pNB2996"

ORIGIN

```
1  ACGGATTAGA  AGCCGCCGAG  CGGGTGACAG  CCCTCCGAAG  GAAGACTCTC  CTCCGTGCGT
61 CCTCGTCTTC  ACCGGTCGCG  TTCCTGAAAC  GCAGATGTGC  CTCGCGCCGC  ACTGCTCCGA
121 ACAATAAAGA  TTCTACAATA  CTAGCTTTTA  TGGTTATGAA  GAGGAAAAAT  TGGCAGTAAC
181 CTGGCCCCAC  AAACCTTCAA  ATGAACGAAT  CAAATTAACA  ACCATAGGAT  GATAATGCGA
241 TTAGTTTTTT  AGCCTTATTT  CTGGGGTAAT  TAATCAGCGA  AGCGATGATT  TTTGATCTAT
301 TAACAGATAT  ATAAATGCAA  AACTGCATA  ACCACTTTAA  CTAATACTTT  CAACATTTTC
361 GGTTTGTATT  ACTTCTTATT  CAAATGTAAT  AAAAGTATCA  ACAAAAAATT  GTTAATATAC
421 CTCTATACTT  TAACGTCAAG  GAGAAAAAAC  CCCGGATCGG  ACTACTAGCA  GCTGTAATAC
481 GACTCACTAT  AGGGAATATT  AAGCTTAAGC  TTACACCCCA  GTATGAGCTT  TATGGATCAA
541 ATCCCAGGAG  GAGGAAATTA  TCCAAACTC  CCAGTAGAAT  GCCTTCCTAA  CTTCCCGATC
601 CAACCATCTT  TGACCTTCAG  AGGTAGAAAT  CACTCGCATA  AACTGAAAAA  CTTTATCTCC
661 GAAATAATGT  TAAACATGTC  TATGATATCT  TGGCCGAATG  ATGCCAGTCG  TATTGTGTAC
721 TGCAGAAGAC  ATTTATTAAA  CCCCCTGCT  CAGTGGGCTA  ATGACTTTGT  ACAAGAACAA
781 GGTATACTTG  AAATAACATT  CGACACATTC  ATACAAGGAT  TATATCAGCA  TTTCTATAAG
841 CCACCAGATA  TCAATAAAAAT  CTTTAATGCA  ATCACGCAAC  TTTCCGAAGC  TAAACTTGGT
901 ATTGAGCGTC  TCAACCAACG  ATTCAGAAAG  ATTTGGGACA  GAATGCCACC  AGACTTCATG
961 ACCGAAAAAG  CTGCCATAAT  GACATATACT  AGGCTATTGA  CAAAGGAAAC  CTATAATATT
```

1021 GTCAGAATGC ACAAACCAGA GACATTAAAA GACGCCATGG AAGAGGCTTA CCAGACAAC T  
1081 GCACTAACTG AAAGATTCTT CCCAGGATTC GAACTTGATG CTGATGGAGA CACTATCATC  
1141 GGTGCCACAA CCCACTTACA AGAAGAATAC GACTCTGACT ATGATTCAGA AGATAATCTG  
1201 ACCCAGAATG GATACGTCCA TACCGTAAGG ACAAGAAGAT CTTACAATAA ACCAATGTCA  
1261 AATCATCGAA ACAGGAGAAA TAACAACCCA TCTAGAGAAG AATGTATAAA AAATCGGCTA  
1321 TGCTTCTATT GTAAGAAAGA GGGACATCGC CTGAACGAAT GTAGAGCACG TAAGGCGAGT  
1381 TCTAACCGAT CTTGAGGTAC CATGACCATG ATTACGGATT CACTGGCCGT CGTTTTACAA  
1441 CGTCGTGACT GGGAAAACCC TGGCGTTACC CAACTTAATC GCCTTGACG ACATCCCCCT  
1501 TTCGCCAGCT GGCCTAATAG CGAAGAGGCC CGCACCGATC GCCCTTCCCA ACAGTTGCGC  
1561 AGCCTGAATG GCGAATGGCG CTTTGCCTGG TTTCCGGCAC CAGAAGCGGT GCCGGAAAGC  
1621 TGGCTGGAGT GCGATCTTCC TGAGGCCGAT ACTGTCGTCTG TCCCCTCAAA CTGGCAGATG  
1681 CACGGTTACG ATGCGCCCAT CTACACCAAC GTGACCTATC CCATTACGGT CAATCCGCCG  
1741 TTTGTTCCCA CGGAGAAATC GACGGGTTGT TACTCGCTCA CATTAAATGT TGATGAAAGC  
1801 TGGCTACAGG AAGGCCAGAC GCGAATTATT TTTGATGGCG TTAACTCGGC GTTTCATCTG  
1861 TGGTGCAACG GGCCTGGGT CGGTACGGC CAGGACAGTC GTTTGCCGTG TGAATTTGAC  
1921 CTGAGCGCAT TTTTACGCGC CGGAGAAAAC CGCCTCGCGG TGATGGTGCT GCGCTGGAGT  
1981 GACGGCAGTT ATCTGGAAGA TCAGGATATG TGGCGGATGA GCGGCATTTT CCGTGACGTC  
2041 TCGTTGCTTC ATAAACCGAC TACACAAATC AGCATTTC ATGTTGCCAC TCGCTTAAAT  
2101 GATGATTTCA GCCGCGCTGT ACTGGAGGTC GAAGTTCAGA TGTGCGGCGA GTTGCGTGAC  
2161 TACCTACGGG TAACAGTTTC TTTATGGCAG GGTGAAACGC AGGTCGCCAG CGGCACCGCG  
2221 CCTTTCGGCG GTGAAATTAT CGATGAGCGT GGTGGTTATG CCGATCGCGT CACACTACGT  
2281 CTGAACGTCG AAAACCCGAA ACTGTGGAGC GCCGAAATCC CGAATCTCTA TCGTGCGGTG  
2341 GTTGAACGTC ACACCCCGCA CGGCACGCTG ATTGAAGCAG AAGCCTGCGA TGTGCGTTTTC  
2401 CGCGAGGTGC GGATTGAAAA TGGTCTGCTG CTGCTGAACG GCAAGCCGTT GCTGATTGCGA  
2461 GGCCTTAACC GTCACGAGCA TCATCCTCTG CATGGTCAGG TCATGGATGA GCAGACGATG  
2521 GTGCAGGATA TCCTGCTGAT GAAGCAGAAC AACTTTAACG CCGTGCGCTG TTCGCATTAT  
2581 CCGAACCATC CGCTGTGGTA CACGCTGTGC GACCGCTACG GCCTGTATGT GGTGGATGAA  
2641 GCCAATATTG AAACCCACGG CATGGTGCCA ATGAATCGTC TGACCGATGA TCCGCGCTGG  
2701 CTACCGGCGA TGAGCGAACG CGTAACGCGA ATGGTGCAGC GCGATCGTAA TCACCCGAGT  
2761 GTGATCATCT GGTCGCTGGG GAATGAATCA GGCCACGGCG CTAATCACGA CGCGCTGTAT  
2821 CGCTGGATCA AATCTGTGCA TCCTTCCCGC CCGGTGCAGT ATGAAGGCGG CGGAGCCGAC  
2881 ACCACGGCCA CCGATATTAT TTGCCCGATG TACGCGCGCG TGGATGAAGA CCAGCCCTTC  
2941 CCGGCTGTGC CGAAATGGTC CATCAAAAAA TGGCTTTCGC TACCTGGAGA GACGCGCCCG  
3001 CTGATCCTTT GCGAATACGC CCACGCGATG GGTAACAGTC TTGGCGGTTT CGCTAAATAC  
3061 TGGCAGGCGT TTCGTCAGTA TCCCCGTTTA CAGGGCGGCT TCGTCTGGGA CTGGGTGGAT  
3121 CAGTCGCTGA TTAAATATGA TGAAAACGGC AACCCGTGGT CGGCTTACGG CCGTGATTTT  
3181 GGCGATACGC CGAACGATCG CCAGTTCTGT ATGAACGGTC TGGTCTTTGC CGACCGCACG  
3241 CCGCATCCAG CGCTGACGGA AGCAAAACAC CAGCAGCAGT TTTTCCAGTT CCGTTTATCC  
3301 GGGCAAACCA TCGAAGTGAC CAGCGAATAC CTGTTCCGTC ATAGCGATAA CGAGCTCCTG  
3361 CACTGGATGG TGGCGCTGGA TGGTAAGCCG CTGGCAAGCG GTGAAGTGCC TCTGGATGTC  
3421 GCTCCACAAG GTAAACAGTT GATTGAACTG CCTGAACTAC CGCAGCCGGA GAGCGCCGGG  
3481 CAACTCTGGC TCACAGTACG CGTAGTGCAA CCGAACGCGA CCGCATGGTC AGAAGCCGGG  
3541 CACATCAGCG CCTGGCAGCA GTGGCGTCTG GCGGAAAACC TCAGTGTGAC GCTCCCCGCC  
3601 GCGTCCCACG CCATCCCACA TCTGACCACC AGCGAAATGG ATTTTTGCAT CGAGCTGGGT  
3661 AATAAGCGTT GGCAATTTAA CCGCCAGTCA GGCTTCTTT CACAGATGTG GATTGGCGAT  
3721 AAAAAACAAC TGCTGACGCC GCTGCGCGAT CAGTTCACCC GTGCACCGCT GGATAACGAC  
3781 ATTGGCGTAA GTGAAGCGAC CCGCATTGAC CCTAACGCC TGGTCGAACG CTGGAAGGCG  
3841 GCGGCCATT ACCAGGCCGA AGCAGGTTG TTAGTGTGCA CCGCAGTAC CCGCATGAT  
3901 GCGGTGCTGA TTACGACCGC TCACGCGTGG CAGCATCAGG GGAAAACCTT ATTTATCAGC  
3961 CGGAAAACCT ACCGGATTGA TGGTAGTGGT CAAATGGCGA TTACCGTTGA TGTGAAGTG  
4021 GCGAGCGATA CACCGCATCC GGCGCGGATT GGCCTGAACT GCCAGCTGGC GCGATTAGCA  
4081 GAGCGGGTAA ACTGGCTCGG ATTAGGGCCG CAAGAAAAC TATCCCGACG CCTTACTGCC  
4141 GCCTGTTTTG ACCGCTGGGA TCTGCCATTG TCAGACATGT ATACCCCGTA CGTCTTCCCG  
4201 AGCGAAAACG GTCTGCGCTG CGGGACGCGC GAATTGAATT ATGGCCACA CCAGTGCGCG  
4261 GGCRACTTCC AGTTCAACAT CAGCCGCTAC AGTCAACAGC AACTGATGGA AACCAGCCAT

4321 CGCCATCTGC TGCACGCGGA AGAAGGCACA TGGCTGAATA TCGACGGTTT CCATATGGGG  
4381 ATTGGTGGCG ACGACTCCTG GAGCCCGTCA GTATCGGCGG AATTCCAGCT GAGCGCCGGT  
4441 CGCTACCATT ACCAGTTGGT CTGGTGTCAA AAATAACCGC GGCCCGGCTG AACATGAGGA  
4501 TCACCCATGT CTGCGGTCGA CTCTAGAAAC ATGAGGATCA CCCATGTCCG GGATCCACTA  
4561 GTAACGGCCG CCAGTGTGCT GGAATTCTGC AGATATCCAT CACTACTGGCG GCCGCTCGAG  
4621 CATGCATCTA GAGGGCCGCA TCATGTAATT AGTTATGTCA CGCTTACATT CACGCCCTCC  
4681 CCCACATCC GCTCTAACCG AAAAGGAAGG AGTTAGACAA CCTGAAGTCT AGGTCCCTAT  
4741 TTATTTTTTT ATAGTTATGT TAGTATTAAG AACGTTATTT ATATTTCAAA TTTTTCTTTT  
4801 TTTTCTGTAC AGACGCGTGT ACGCATGTAA CATTATACTG AAAACCTTGC TTGAGAAGGT  
4861 TTTGGGACGC TCGAAGGCTT TAATTTGCGG CCCTGCATTA ATGAATCGGC CAACGCGCGG  
4921 GGAGAGGCGG TTTGCGTATT GGGCGCTCTT CCGCTTCCCT GCTCACTGAC TCGCTGCGCT  
4981 CGGTCGTTCC GCTGCGGCGA GCGGTATCAG CTCACTCAAA GGCGGTAATA CGGTTATCCA  
5041 CAGAATCAGG GGATAACGCA GGAAAGAACA TGTGAGCAAA AGGCCAGCAA AAGCCAGGA  
5101 ACCGTAAAAA GGCCGCGTTG CTGGCGTTTT TCCATAGGCT CCGCCCCCTT GACGAGCATC  
5161 ACAAAAATCG ACGCTCAAGT CAGAGGTGGC GAAACCCGAC AGGACTATAA AGATACCAGG  
5221 CGTTTCCCCC TGGAAGCTCC CTCGTGCGCT CTCTGTTC CACCCTGCCG CTTACCGGAT  
5281 ACCTGTCCGC CTTTCTCCCT TCGGGAAGCG TGGCGCTTTC TCATAGCTAA CGCTGTAGGT  
5341 ATCTCAGTTC GGTGTAGGTC GTTCGTTCCA AGCTGGGCTG TGTGCACGAA CCCCCGTTT  
5401 AGCCCGACCG CTGCGCCTTA TCCGGTAACT ATCGTCTTGA GTCCAACCCG GTCCAGACAG  
5461 ACTTATCGCC ACTGGCAGCA GCCACTGGTA ACAGGATTAG CAGAGCGAGG TATGTAGGCG  
5521 GTGCTACAGA GTTCTTGAAG TGGTGGCCTA ACTACGGCTA CACTAGAAGG ACAGTATTTG  
5581 GTATCTGCGC TCTGCTGAAG CCAGTTACCT TCGGAAAAAG AGTTGGTAGC TCTTGATCCG  
5641 GCAAACAAAC CACCGCTGGT AGCGGTGGTT TTTTTGTTTG CAAGCAGCAG ATTACGCGCA  
5701 GAAAAAAGG ATCTCAAGAA GATCCTTTGA TCTTTTCTAC GGGGTCTGAC GCTCAGTGGA  
5761 ACGAAAATC ACGTTAAGGG ATTTTGGTCA TGAGATTATC AAAAAGGATC TTCACCTAGA  
5821 TCCTTTTAAA TTA AAAATGA AGTTTTAAAT CAATCTAAAG TATATATGAG TAAACTTGGT  
5881 CTGACAGTTA CCAATGCTTA ATCAGTGAGG CACCTATCTC AGCGATCTGT CTATTTCTGT  
5941 CATCCATAGT TGCCTGACTC CCCGTCGTGT AGATAACTAC GATACGGGAG CGCTTACCAT  
6001 CTGGCCCCAG TGCTGCAATG ATACCGCGAG ACCCAGCTC ACCGGCTCCA GATTTATCAG  
6061 CAATAAACCA GCCAGCCGGA AGGGCCGAGC GCAGAAGTGG TCCTGCAACT TTATCCGCCT  
6121 CCATTCAGTC TATTAATTGT TGCCGGGAAG CTAGAGTAAG TAGTTCGCCA GTTAATAGTT  
6181 TGCGCAACGT TGTTGGCATT GCTACAGGCA TCGTGGTGTC ACTCTCGTCG TTTGGTATGG  
6241 CTTTATTAGT CTCCGGTTCC CAACGATCAA GCGGAGTTAC ATGATCCCCC ATGTTGTGCA  
6301 AAAAAGCGGT TAGCTCCTTC GGTCCTCCGA TCGTTGTCAG AAGTAAGTTG GCCGCAGTGT  
6361 TATCACTCAT GGTTATGGCA GCACTGCATA ATTCTCTTAC TGTCATGCCA TCCGTAAGAT  
6421 GCTTTTCTGT GACTGGTGAG TACTCAACCA AGTCATTCTG AGAATAGTGT ATGCGGCGAC  
6481 CGAGTTGCTC TTGCCCGCGG TCAATACGGG ATAATAGTGT ATCACATAGC AGAATTTTAA  
6541 AAGTGCTCAT CATTGGAAAA CGTTCCTTCGG GCGGAAAACT CTCAAGGATC TTACCGCTGT  
6601 TGAGATCCAG TTTCGATGTAA CCCACTCGTG CACCCAACCTG ATCTTCAGCA TCTTTTACTT  
6661 TCACCAGCGT TTCTGGGTGA GCAAAAACAG GAAGGCAAAA TGCCGCAAAA AAGGGAATAA  
6721 GGGCGACACG GAAATGTTGA ATACTCATA TCTTCTTTT TCAATGGGTA ATAACGATA  
6781 TAATTAATT GAAGCTCTAA TTTGTGAGTT TAGTATACAT GCATTTACTT ATAATACAGT  
6841 TTTTGTAGTT TGCTGGCCGC ATCTTCTCAA ATATGCTTCC CAGCCTGCTT TTCTGTAAACG  
6901 TTCACCCTCT ACCTTAGCAT CCCTTCCCTT TGCAAAATAGT CCTCTTCCAA CAATAATAAT  
6961 GTCAGATCCT GTAGAGACCA CATCATCCAC GGTCTATAC TGTTGACCCA ATGCGTCTCC  
7021 CTTGTATCT AAACCCACAC CGGGTGTCAT AATCAACCAA TCGTAACCTT CATCTCTTCC  
7081 ACCCATGTCT CTTTGAGCAA TAAAGCCGAT AACAAAATCT TTGTCTGCTC TCGCAATGTC  
7141 AACAGTACCC TTAGTATATT CTCCAGTAGA TAGGGAGCCC TTGCATGCA ATTCTGCTAA  
7201 CATCAAAAGG CCTCTAGGTT CCTTTGTTAC TTCTTCTGCC GCCTGTCTCA AACCGCTAAC  
7261 AATACCTGGG CCCACCACAC CGTGTGCATT CGTAATGTCT GCCCATTCTG CTATTCTGTA  
7321 TACACCCGCA GAGTACTGCA ATTTGACTGT ATTACCAATG TCAGCAAATT TTCTGTCTTC  
7381 GAAGAGTAAA AAATTGTACT TGGCGGATAA TGCCTTTAGC GGCTTAACTG TGCCCTCCAT  
7441 GGAAAAATCA GTCAAGATAT CCACATGTGT TTTTAGTAAA CAAATTTTGG GACCTAATGC  
7501 TTCAACTAAC TCCAGTAATT CCTTGGTGGT ACGAACATCC AATGAAGCAC ACAAGTTTGT  
7561 TTGCTTTTTCG TGCATGATAT TAAATAGCTT GGCAGCAACA GGACTAGGAT GAGTAGCAGC



7621 ACGTTCCTTA TATGTAGCTT TCGACATGAT TTATCTTCGT TTCCTGCAGG TTTTGTTCCT  
7681 GTGCAGTTGG GTTAAGAATA CTGGGCAATT TCATGTTTCT TCAACACTAC ATATGCGTAT  
7741 ATATACCAAT CTAAGTCTGT GCTCCTTCCT TCGTTCTTCC TTCTGTTCGG AGATTACCGA  
7801 ATCAAAAAAA TTTCAAAGAA ACCGAAATCA AAAAAAGAA TAAAAAATA ATGATGAATT  
7861 GAATTGAAAA GCTAGCTTAT CGATGATAAG CTGTCAAAGA TGAGAATTAA TTCCACGGAC  
7921 TATAGACTAT ACTAGATACT CCGTCTACTG TACGATACAC TTCCGCTCAG GTCCTGTGCC  
7981 TTTAACGAGG CTTACCCTCT CTTTTGTTAC TCTATTGATC CAGCTCAGCA AAGGCAGTGT  
8041 GATCTAAGAT TCTATCTTCG CGATGTAGTA AAACCTAGCTA GACCGAGAAA GAGACTAGAA  
8101 ATGCAAAAGG CACTTCTACA ATGGCTGCCA TCATTATTAT CCGATGTGAC GCTGCAGCTT  
8161 CTCAATGATA TTGCAATACG CTTTGAGGAG ATACAGCCTA ATATCCGACA AACTGTTTTA  
8221 CAGATTTACG ATCGTACTTG TTACCCATCA TTGAATTTTG AACATCCGAA CCTGGGAGTT  
8281 TTCCCTGAAA CAGATAGTAT ATTTGAACCT GTATAATAAT ATATAGTCTA GCGCTTTACG  
8341 GAAGACAATG TATGTATFTC GGTTCCCTGGA GAAACTATTG CATCTATTGC ATAGGTAATC  
8401 TTGCACGTCG CATCCCCGGT TCATTTTCTG CGTTTCCATC TTGCACTTCA ATAGCATATC  
8461 TTTGTTAACG AAGCATCTGT GCTTCATTTT GTAGAACAAA AATGCAACGC GAGAGCGCTA  
8521 ATTTTTCAAA CAAAGAATCT GAGCTGCATT TTTACAGAAC AGAAATGCAA CGCGAAAGCG  
8581 CTATTTTACC AACGAAGAAT CTGTGCTTCA TTTTGTAAA AAAAAATGC AACGCGACGA  
8641 GAGCGCTAAT TTTTCAAACA AAGAATCTGA GCTGCATTTT TACAGAACAG AAATGCAACG  
8701 CGAGAGCGCT ATTTTACCAA CAAAGAATCT ATACTTCTTT TTTGTTCTAC AAAAATGCAT  
8761 CCCGAGAGCG CTATTTTCTT ACAAAGCAT CTTAGATTAC TTTTTTCTC CTTTGTGCGC  
8821 TCTATAATGC AGTCTCTTGA TAACTTTTTG CACTGTAGGT CCGTTAAGGT TAGAAGAAGG  
8881 CTACTTTGGT GTCTATTTTC TCTTCCATAA AAAAAGCCTG ACTCCACTTC CCGGTTTAC  
8941 TGATTACTAG CGAAGCTGCG GGTGCATTTT TTCAAGATAA AGGCATCCCC GATTATATTC  
9001 TATACCGATG TGGATTGCGC ATACTTTGTG AACAGAAAGT GATAGCGTTG ATGATTCTTC  
9061 ATTGGTCAGA AAATTATGAA CGGTTTCTTC TATTTTGTCT CTATATACTA CGTATAGGAA  
9121 ATGTTTACAT TTTTCGTATTG TTTTTCGATTC ACTCTATGAA TAGTTCTTAC TACAATTTTT  
9181 TTGTCTAAAG AGTAATACTA GAGATAAACA TAAAAAATGT AGAGGTCGAG TTTAGATGCA  
9241 AGTTCAAGGA GCGAAAGGTG GATGGGTAGG TTATATAGGG ATATAGCACA GAGATATATA  
9301 GCAAAGAGAT ACTTTTGGAG AATGTTTGTG GAAGCGGTAT TCGCAATGGG AAGCTCCACC  
9361 CCGGTTGATA ATCAGAAAAG CCCCAAAAAC AGGAAGATTG TATAAGCAA TATTTAAATT  
9421 GTAAACGTTA ATATTTTGTG AAAATTCGCG TTAAATTTTT GTTAAATCAG CTCATTTTTT  
9481 AACGAATAGC CCGAAATCGG CAAAATCCCT TATAAATCAA AAGAATAGAC CGAGATAGGG  
9541 TTGAGTGTTG TTCCAGTTTC CAACAAGAGT CCACTATTAA AGAACGTGGA CTCCAACGTC  
9601 AAAGGGCGAA AAAGGGTCTA TCAGGGCGAT GGCCCACTAC GTGAACCATC ACCCTAATCA  
9661 AGTTTTTTTGG GGTCGAGGTG CCGTAAAGCA GTAAATCGGA AGGGTAAACG GATGCCCCCA  
9721 TTTAGAGCTT GACGGGGAAA GCCGGCGAAC GTGGCGAGAA AGGAAGGGAA GAAAGCGAAA  
9781 GGAGCGGGG CTAGGGCGGT GGAAGTGTA GGGGTCACGC TGGGCGTAAC CACCACACC  
9841 GCCGCGCTTA ATGGGGCGCT ACAGGGCGCG TGGGGATGAT CCACTAGT

//

|              |                        |                                                                                                                                                                                                                                             |     |          |             |
|--------------|------------------------|---------------------------------------------------------------------------------------------------------------------------------------------------------------------------------------------------------------------------------------------|-----|----------|-------------|
| LOCUS        | pNB3007                | 7142 bp                                                                                                                                                                                                                                     | DNA | circular | 15-JUN-2012 |
| FEATURES     | Location/Qualifiers    |                                                                                                                                                                                                                                             |     |          |             |
| misc_feature | 475..494               | /note="T7 Promoter"                                                                                                                                                                                                                         |     |          |             |
| misc_feature | 2424..2997             | /note="pUC origin"                                                                                                                                                                                                                          |     |          |             |
| misc_feature | complement(3142..4002) | /note="Amp Resistance Gene"                                                                                                                                                                                                                 |     |          |             |
| misc_feature | complement(4020..5127) | /note="URA3 gene"                                                                                                                                                                                                                           |     |          |             |
| misc_feature | 5131..6602             | /note="2 micron origin"                                                                                                                                                                                                                     |     |          |             |
| misc_feature | complement(6670..7125) | /note="f1 origin"                                                                                                                                                                                                                           |     |          |             |
| misc_feature | 507..512               | /note="KpnI cloning site"                                                                                                                                                                                                                   |     |          |             |
| misc_feature | 394..399               | /note="transcription start site"                                                                                                                                                                                                            |     |          |             |
| misc_feature | 1..451                 | /note="GAL1"                                                                                                                                                                                                                                |     |          |             |
| misc_feature | 513..522               | /note="translation intiation sequence"                                                                                                                                                                                                      |     |          |             |
| misc_feature | 523..1143              | /note="Capsid"                                                                                                                                                                                                                              |     |          |             |
| CDS          | 523..1143              | /note=""                                                                                                                                                                                                                                    |     |          |             |
|              |                        | /translation="MSFMDQIPGGGNYPKLPVECLPNFPPIQPSLTFRGRNDSHKLKNF<br>ISEIMLNMSMISWPNDASRIVYCRRHLLNPAAQWANDFVQEQGILEITFDTFIQGLYQ<br>HFYKPPDINKIFNAITQLSEAKLGIERLNQFRKIWDRMPPDFMTEKAAIMTYTRLLT<br>KETYNIVRMHKPETLKDAMEEAYQTTALTERFFPGFELDADGDITIIG" |     |          |             |
| misc_feature | 1144..1221             | /note=""                                                                                                                                                                                                                                    |     |          |             |
| CDS          | 1144..1221             | /note=""                                                                                                                                                                                                                                    |     |          |             |
|              |                        | /translation="ATTHLQEEYDSYDSEDNLTQNGYVH"                                                                                                                                                                                                    |     |          |             |
| misc_feature | 1222..1395             | /note="Nucleocapsid"                                                                                                                                                                                                                        |     |          |             |
| CDS          | 1222..1395             | /note=""                                                                                                                                                                                                                                    |     |          |             |
|              |                        | /translation="TVRTRRSYNKPMNSHRNRRNNNPSREECIKNRLCFYCKKEGHRL<br>NECRARKASSNRS"                                                                                                                                                                |     |          |             |
| misc_feature | 1401..1446             | /note="U3"                                                                                                                                                                                                                                  |     |          |             |
| misc_feature | 1401..1446             | /note="POL3"                                                                                                                                                                                                                                |     |          |             |
| misc_feature | 1453..1508             | /note="MS2"                                                                                                                                                                                                                                 |     |          |             |
| misc_feature | 1514..1686             | /note="U3"                                                                                                                                                                                                                                  |     |          |             |
| misc_feature | 1622..1634             | /note="3' PBSA"                                                                                                                                                                                                                             |     |          |             |
| misc_feature | 1638..1649             | /note="3' PBSB"                                                                                                                                                                                                                             |     |          |             |
| misc_feature | 1687..1737             | /note="R"                                                                                                                                                                                                                                   |     |          |             |

```

misc_feature      1695..1698
                  /note="mapped end of transcript 1"
misc_feature      1716..1718
                  /note="mapped end of transcript 2"
misc_feature      1728..1730
                  /note="mapped end of transcript 3"
misc_feature      1735..1737
                  /note="mapped end of transcript 4"
misc_feature      1738..1804
                  /note="U5"
misc_feature      1894..2141
                  /note="CYC terminator"
misc_feature      2061..2067
                  /note="transcription end"
source            1..7142
                  /dnas_title="pNB3007"

```

ORIGIN

```

  1  ACGGATTAGA  AGCCGCCGAG  CGGGTGACAG  CCCTCCGAAG  GAAGACTCTC  CTCGGTGCCT
 61  CCTCGTCTTC  ACCGGTCGCG  TTCCTGAAAC  GCAGATGTGC  CTCGCGCCGC  ACTGCTCCGA
121  ACAATAAAGA  TTCTACAATA  CTAGCTTTTA  TGGTTATGAA  GAGGAAAAAT  TGGCAGTAAC
181  CTGGCCCCAC  AAACCTTCAA  ATGAACGAAT  CAAATTAACA  ACCATAGGAT  GATAATGCGA
241  TTAGTTTTTT  AGCCTTATTT  CTGGGGTAAT  TAATCAGCGA  AGCGATGATT  TTTGATCTAT
301  TAACAGATAT  ATAAATGCAA  AAACCTGCATA  ACCACTTTAA  CTAATACTTT  CAACATTTTC
361  GGTGGTGTAT  ACTTCTTATT  CAAATGTAAT  AAAAGTATCA  AAAAAAATT  GTTAATATAC
421  CTCTATACTT  TAACGTCAAG  GAGAAAAAAC  CCCGGATCGG  ACTACTAGCA  GCTGTAATAC
481  GACTCACTAT  AGGGAATATT  AAGCTTGGTA  CCACACCCCA  GTATGAGCTT  TATGGATCAA
541  ATCCCAGGAG  GAGGAAATTA  TCCAAAACCTC  CCAGTAGAAT  GCCTTCCTAA  CTTCCCGATC
601  CAACCATCTT  TGACCTTCAG  AGGTAGAAAT  GACTCGCATA  AACTGAAAAA  CTTTATCTCC
661  GAAATAATGT  TAAACATGTC  TATGATATCT  TGGCCGAATG  ATGCCAGTCG  TATTGTGTAC
721  TGCAGAAGAC  ATTTATTAAA  CCCCCTGTCT  CAGTGGGCTA  ATGACTTTGT  ACAAGAACAA
781  GGTATACTTG  AAATAACATT  CGACACATTC  ATACAAGGAT  TATATCAGCA  TTTCTATAAG
841  CCACCAGATA  TCAATAAAAT  CTTTAATGCA  ATCACGCAAC  TTTCCGAAGC  TAAACTTGGT
901  ATTGAGCGTC  TCAACCAACG  ATTCAGAAAG  ATTTGGGACA  GAATGCCACC  AGACTTCATG
961  ACCGAAAAAG  CTGCCATAAT  GACATATACT  AGGCTATTGA  CAAAGGAAAC  CTATAATATT
1021  GTCAGAATGC  ACAAACCAGA  GACATTAATA  GACGCCATGG  AAGAGGCTTA  CCAGACAACT
1081  GACTAAGTGC  AAAGATTCTT  CCCAGGATTC  GAACTTGATG  CTGATGGAGA  CACTATCATC
1141  GGTGCCACAA  CCCACTTACA  AGAAGAATAC  GACTCTGACT  ATGATTCAGA  AGATAATCTG
1201  ACCCAGAATG  GATACGTCCA  TACCGTAAGG  ACAAGAAGAT  CTTACAATAA  ACCAATGTCA
1261  AATCATCGAA  ACAGGAGAAA  TAACAACCCA  TCTAGAGAAG  AATGTATAAA  AAATCGGCTA
1321  TGCTTCTATT  GTAAGAAAAG  GGGACATCGC  CTGAACGAAT  GTAGAGCACG  TAAGGCGAGT
1381  TCTAACCGAT  CTTGACCCGG  TGTGTATCT  CAAAATGAGA  TATGTCAGTA  TGACAATACG
1441  TCACCCGGCT  GAACATGAGG  ATCACCCATG  TCTGCGGTCG  ACTCTAGAAA  CATGAGGATC
1501  ACCCATGTCC  GGGACGTTCA  TAAAACACAT  ATGAAACAAC  CTTATAACAA  AACGAACAAC
1561  ATGAGACAAA  ACCCGACCTT  CCCTAGCTGA  ACTACCCAAA  GTATAAATGC  CTGAACAATT
1621  AGTTTAGATC  CGAGATTCCG  CGCTTCCACC  ACTTAGTATG  ATTCATATTT  TATATAATAT
1681  ATAAGATAAG  TAACATTCCG  TGAATTAATC  TGATAAACTG  TTTTGACAAC  TGGTACTTTC
1741  CCTAAGACTG  TTTATATTAG  GATTGTCAAG  ACACTCCGGT  ATTACTCGAG  CCCGTAATAC
1801  AACAGGATCC  ACTAGTAACG  GCCGCCAGTG  TGCTGGAATT  CTGCAGATAT  CCATCACACT
1861  GCGGCCGCT  CGAGCATGCA  TCTAGAGGGC  CGCATCATGT  AATTAGTTAT  GTCACGCTTA
1921  CATTACGCC  CTCCCCCAC  ATCCGCTCTA  ACCGAAAAGG  AAGGAGTTAG  ACAACCTGAA
1981  GTCTAGGTCC  CTATTTATTT  TTTTATAGTT  ATGTTAGTAT  TAAGAACGTT  ATTTATATTT
2041  CAAATTTTTT  TTTTTTTTCT  GTACAGACGC  GTGTACGCAT  GTAACATTAT  ACTGAAAACC
2101  TTGCTTGAGA  AGGTTTTGGG  ACGCTCGAAG  GCTTTAATTT  GCGGCCCTGC  ATTAATGAAT
2161  CGGCCAACGC  GCGGGGAGAG  GCGGTTTGCG  TATTGGGCGC  TCTTCCGCTT  CCTCGCTCAC
2221  TGACTCGCTG  CGCTCGGTCT  TTCGGCTGCG  GCGAGCGGTA  TCAGCTCACT  CAAAGGCGGT

```

2281 AATACGGTTA TCCACAGAAT CAGGGGATAA CGCAGGAAAG AACATGTGAG CAAAAGGCCA  
2341 GCAAAAGCCC AGGAACCGTA AAAAGGCCGC GTTGCTGGCG TTTTTCATA GGCTCCGCC  
2401 CCCTGACGAG CATCACAAA ATCGACGCTC AAGTCAGAG TGGCGAAACC CGACAGGACT  
2461 ATAAAGATAC CAGGCGTTTC CCCCTGGAAG CTCCCTCGTG CGCTCTCCTG TTCCGACCCT  
2521 GCCGCTTACC GGATACCTGT CCGCCTTTCT CCCTTCGGA AGCGTGGCGC TTTCTCATAG  
2581 CTCACGCTGT AGGTATCTCA GTTCGGTGTA GGTTCGTTCG TCCAAGCTGG GCTGTGTGCA  
2641 CGAACCCCCG GTTCAGCCCG ACCGCTGCGC CTTATCCGGT AACTATCGTC TTGAGTCCAA  
2701 CCCGGTAAGA CACGACTTAT CGCCACTGGC AGCAGCCACT GGTAACAGGA TTAGCAGAGC  
2761 GAGGTATGTA GGCGGTGCTA CAGAGTTCTT GAAAGTGGTG CCTAACTACG GCTACACTAG  
2821 AAGGACAGTA TTTGGTATCT GCGCTCTGCT GAAAGCCAGT ACCTTCGGAA AAAGAGTTGG  
2881 TAGCTCTTGA TCCGGCAAAAC AAACCACCGC TGGTAGCGGT GGTTTTTTTTG TTTGCAAGCA  
2941 GCAGATTACG CGCAGAAAAA AAGGATCTCA AGAAGATCCT TTGATCTTTT CTACGGGGTC  
3001 TGACGCTCAG TGGAACGAAA ACTCACGTTA AGGGATTTTG GTCATGAGAT TATCAAAAAG  
3061 GATCTTCACC TAGATCCTTT TAAATTAATA ATGAAGTTT AAATCAATCT AAAGTATATA  
3121 TGAGTAAACT TGGTCTGACA GTTACCAATG CTTAATCAGT GAGGCACCTA TCTCAGCGAT  
3181 CTGTCTATTT CGTTCATCCA TAGTTGCCTG ACTCCCCGTC GTGTAGATAA CTACGATACG  
3241 GGAGCGCTTA CCATCTGGCC CCAGTGTGC AATGATACCG CGAGACCCG GCTCACCGGC  
3301 TCCAGATTTA TCAGCAATAA ACCAGCCAGC CGGAAGGGCC GAGCGCAAA GTGGTCTGTC  
3361 AACTTTTACC GCCTCCATTC AGTCTATTAA TTGTTGCCGG GAAGCTAGAG TAAGTAGTTC  
3421 GCCAGTTAAT AGTTTGCGCA ACGTTGTTGG CATTGCTACA GGCATCGTGG TGCTACTCTC  
3481 GTCGTTTGGT ATGGCTTCAT TCAGCTCCGG TTCCCAACGA TCAAGGCGAG TTACATGATC  
3541 CCCCATGTTG TGCAAAAAAG CGGTTAGCTC CTTCCGTCCT CCGATCGTTG TCAGAAGTAA  
3601 GTTGCCGCA GTGTTATCAC TCATGGTTAT GGCAGCACTG CATAATTCTC TTACTGTCTC  
3661 GCCATCCGTA AGATGCTTTT CTGTGACTGG TGAGTACTCA ACCAAGTCAT TCTGAGAATA  
3721 GTGTATGCGG CGACCGAGTT GCTCTTGCCC GCGTCAATA CGGGATAATA GTGTATCACA  
3781 TAGCAGAACT TTA AAAAGTGC TCATCATTGG AAAACGTTCT TCGGGGCGAA AACTCTCAAG  
3841 GATCTTACCG CTGTTGAGAT CCAGTTCGAT GTAACCCACT CGTGCACCCA ACTGATCTTC  
3901 AGCATCTTTT ACTTTCACCA GCGTTTCTGG GTGAGCAAAA ACAGGAAGGC AAAATGCCGC  
3961 AAAAAAGGGA ATAAGGGCGA CACGGAAATG TTGAATACTC ATACTCTTCC TTTTCAATG  
4021 GGTAATAACT GATATAATTA AATTGAAGCT CTAATTTGTG AGTTTAGTAT ACATGCATTT  
4081 ACTTATAATA CAGTTTTTTA GTTTTGCTGG CCGCATCTTC TCAAATATGC TTCCAGCCT  
4141 GCTTTTCTGT AACGTTACC CTCTACCTTA GCATCCCTTC CTTTTGCAA TAGTCTCTT  
4201 CCAACAATAA TAATGTCAGA TCCTGTAGAG ACCACATCAT CCACGGTCT ATACTGTTGA  
4261 CCAATGCGT CTCCCTTGTC ATCTAAACCC ACACCGGGTG TCATAATCAA CCAATCGTAA  
4321 CCTTCATCTC TTCCACCCAT GTCTCTTTGA GCAATAAAGC CGATAACAAA ATCTTTGTGCG  
4381 CTCTTCGCAA TGTCAACAGT ACCCTTAGTA TATTCTCCAG TAGATAGGGA GCCCTTGCAT  
4441 GACAATTCTG CTAACATCAA AAGGCCTCTA GGTTCCTTTG TTA CTCTTC TGCCGCCTGC  
4501 TTCAAACCGC TAACAATACC TGGGCCACC ACACCGTGTG CATTCGTAAT GTCTGCCCAT  
4561 TCTGCTATTC TGTATACACC CGCAGAGTAC TGCAATTTGA CTGTATTACC AATGTCAGCA  
4621 AATTTTCTGT CTTGGAAGAG TAAAAAATTG TACTTGGCGG ATAATGCCTT TAGCGGCTTA  
4681 ACTGTGCCCT CCATGGAAAA ATCAGTCAAG ATATCCACAT GTGTTTTTAG TAAACAAATT  
4741 TTGGGACCTA ATGCTTCAAC TAACTCCAGT AATTCCCTGG TGGTACGAAC ATCCAATGAA  
4801 GCACACAAGT TTGTTTGCTT TTCGTGCATG ATATTAATA GCTTGGCAGC AACAGGACTA  
4861 GGATGAGTAG CAGCACGTT CTTATATGTA GCTTTCGACA TGATTTATCT TCGTTTCTG  
4921 CAGGTTTTTG TTCTGTGCAG TTGGGTTAAG AATACTGGGC AATTTTATGT TTCTTCAACA  
4981 CTACATATGC GTATATATAC CAATCTAAGT CTGTGCTCCT TCCTTCGTTT TTCTTCTGT  
5041 TCGGAGATTA CCGAATCAAA AAAATTTCAA AGAAACCGAA ATCAAAAAA AGAATAAAAA  
5101 AAAAAATGATG AATTGAATTG AAAAGCTAGC TTATCGATGA TAAGTGTCA AAGATGAGAA  
5161 TTAATTCAC GGACTATAGA CTATACTAGA TACTCCGTCT ACTGTACGAT ACACTTCCGC  
5221 TCAGGTCCTT GTCCTTTAA GAGGCCTTAC CACTCTTTG TTA CTCTATT GATCCAGCTC  
5281 AGCAAAGGCA GTGTGATCTA AGATTCTATC TTCGCGATGT AGTAAACTA GCTAGACCGA  
5341 GAAAGAGACT AGAAATGCAA AAGGCACTTC TACAATGGCT GCCATCATT TATCCGATG  
5401 TGACGCTGCA GCTTCTCAAT GATATTGCAA TACGCTTTGA GGAGATACAG CCTAATATCC  
5461 GACAACTGT TTTACAGATT TACGATCGTA CTTGTTACCC ATCATTGAAT TTTGAACATC  
5521 CGAACCTGGG AGTTTTCCCT GAAACAGATA GTATATTTGA ACCTGTATAA TAATATATAG

5581 TCTAGCGCTT TACGGAAGAC AATGTATGTA TTTTCGGTTC TGGAGAACT ATTGCATCTA  
5641 TTGCATAGGT AATCTTGCAC GTCGCATCCC CGGTTCAATTT TCTGCGTTTC CATCTTGCAC  
5701 TTCAATAGCA TATCTTTGTT AACGAAGCAT CTGTGCTTCA TTTTGTAGAA CAAAAATGCA  
5761 ACGCGAGAGC GCTAATTTTT CAAACAAAGA ATCTGAGCTG CATTTTTTACA GAACAGAAAT  
5821 GCAACGCGAA AGCGCTATTT TACCAACGAA GAATCTGTGC TTCATTTTTTG TAAACAAAA  
5881 ATGCAACGCG ACGAGAGCGC TAATTTTTTCA AACAAAGAAT CTGAGCTGCA TTTTACAGA  
5941 ACAGAAATGC AACGCGAGAG CGCTATTTTA CCAACAAAGA ATCTATACTT CTTTTTTGTT  
6001 CTACAAAAAT GCATCCCGAG AGCGCTATTT TTCTAACAAA GCATCTTAGA TTACTTTTTT  
6061 TCTCCTTTGT GCGCTCTATA ATGCAGTCTC TTGATAACTT TTTGCACTGT AGGTCCGTTA  
6121 AGGTTAGAAG AAGGCTACTT TGGTGTCTAT TTTCTCTTCC ATAAAAAAG CCTGACTCCA  
6181 CTTCCCGCGT TTAAGTACTT CTAGCGAAGC TGCGGGTGCA TTTTTTCAAG ATAAAGGCAT  
6241 CCCCATTAT ATTCTATACC GATGTGGATT GCGCATACTT TGTGAACAGA AAGTGATAGC  
6301 GTTGATGATT CTTCAATGGT CAGAAAATTA TGAACGGTTT CTTCTATTTT GTCTCTATAT  
6361 ACTACGTATA GGAAATGTTT ACATTTTCGT ATTGTTTTCG ATTCACTCTA TGAATAGTTC  
6421 TTAAGTACAAT TTTTTTGTCT AAAGAGTAAT ACTAGAGATA AACATAAAAA ATGTAGAGGT  
6481 CGAGTTTAGA TGCAAGTTCA AGGAGCGAAA GGTGGATGGG TAGGTTATAT AGGGATATAG  
6541 CACAGAGATA TATAGCAAAG AGATACTTTT GAGCAATGTT TGTGGAAGCG GTATTCGCAA  
6601 TGGGAAGCTC CACCCCGGT GATAATCAGA AAAGCCCAA AAACAGGAAG ATTGTATAAG  
6661 CAAATATTTA AATTGTAAAC GTTAATATTT TGTTAAAATT CGCGTTAAAT TTTTGTAAA  
6721 TCAGCTCATT TTTTAACGAA TAGCCCGAAA TCGGCAAAAT CCCTTATAAA TCAAAAGAAT  
6781 AGACCGAGAT AGGGTTGAGT GTTGTTCAG TTTCCAACAA GAGTCCACTA TTAAAGAACG  
6841 TGGACTCCAA CGTCAAAGG CGAAAAAGG TCTATCAGG CGATGGCCA CTACGTGAAC  
6901 CATCACCTA ATCAAGTTTT TTGGGGTCGA GGTGCCGTAA AGCAGTAAAT CGGAAGGGTA  
6961 AACGGATGCC CCCATTTAGA GCTTGACGGG GAAAGCCGGC GAACGTGGCG AGAAAGGAAG  
7021 GGAAGAAAGC GAAAGGAGCG GGGGCTAGGG CGGTGGGAAG TGTAGGGGTC ACGCTGGGCG  
7081 TAACCACCAC ACCCGCCGCG CTTAATGGGG CGCTACAGG CGCGTGGGGA TGATCCACTA  
7141 GT

//

```

LOCUS      pNB3026                6874 bp    DNA      circular    15-JUN-2012
FEATURES             Location/Qualifiers
  misc_feature       1537..1618
                       /note="Multiple cloning site"
  misc_feature       2156..2729
                       /note="pUC origin"
  misc_feature       complement(2874..3734)
                       /note="Amp Resistance Gene"
  misc_feature       complement(3752..4859)
                       /note="URA3 gene"
  misc_feature       4863..6334
                       /note="2 micron origin"
  misc_feature       complement(6402..6857)
                       /note="f1 origin"
  misc_feature       1..393
                       /note="Gal Promoter"
  misc_feature       579..588
                       /note="Ty3 translation initiation sequence"
  misc_feature       1527..1531
                       /note="partial xmaI site"
  misc_feature       1467..1526
                       /note="MS2 site"
  misc_feature       1532..1536
                       /note="SacI Gag3 cloning site"
  misc_feature       516..523
                       /note="5' PBS"
  misc_feature       396..406
                       /note="start of transcription "
  misc_feature       396..446
                       /note="R"
  misc_feature       447..513
                       /note="U5"
  misc_feature       589..1209
                       /note="Capsid"
  CDS                589..1209
                       /note=""
                       /translation="MSFMDQIPGGGNYPKLPVECLPNFPIQPSLTFRGRNDSHKLNK
ISEIMLNMSMISWPNDASRIVYCRRLNPAQWANDFVQEQGILEITFDTFIQGLYQ
HFYKPPDINKIFNAITQLSEAKLGIERLNQFRKIWDRMPPDFMTEKAAIMTYTRLLT
KETYNIVRMHKPETLKDAMEEAYQTTALTERFFPGFELDADGDTIIG"
  misc_feature       1210..1287
                       /note=""
  CDS                1210..1287
                       /note=""
                       /translation="ATTHLQEEYDSYDSEDNLTQNGYVH"
  misc_feature       1288..1461
                       /note="Nucleocapsid"
  CDS                1288..1461
                       /note=""
                       /translation="TVRTRRSYNKPMNHRNRRNNNPSREECIKNRLCFYCKKEGHRL
NECRARKASSNRS"
  misc_feature       1626..1873
                       /note="CYC terminator"
  misc_feature       1793..1799
                       /note="transcription end"

```

source 1..6874  
/dnas\_title="pNB3026"

ORIGIN

```
1  ACGGATTAGA AGCCGCCGAG CGGGTGACAG CCCTCCGAAG GAAGACTCTC CTCCGTGCGT
61 CCTCGTCTTC ACCGGTCGCG TTCCTGAAAC GCAGATGTGC CTCGCGCCGC ACTGCTCCGA
121 ACAATAAAGA TTCTACAATA CTAGCTTTTA TGGTTATGAA GAGGAAAAAT TGGCAGTAAC
181 CTGGCCCCAC AAACCTTCAA ATGAACGAAT CAAATTAACA ACCATAGGAT GATAATGCGA
241 TTAGTTTTTT AGCCTTATTT CTGGGGTAAT TAATCAGCGA AGCGATGATT TTTGATCTAT
301 TAACAGATAT ATAAATGCAA AAACCTGCATA ACCACTTTAA CTAATACTTT CAACATTTTC
361 GGTTCGTATT ACTTCTTATT CAAATGTAAT AAAGATAAGT AACATTCCGT GAATTAATCT
421 GATAAACTGT TTTGACAAC TGGTACTTCC CTAAGACTGT TTATATTAGG ATTGTCAAGA
481 CACTCCGGTA TTAATCGAGC CCGTAATACA ACACCTGGTA GCGTTAAAGG TTAATAATTG
541 TTCAAACGAA CCATCGAAAA GCCGAACCTA GCTACACCAC ACCCCAGTAT GAGCTTTATG
601 GATCAAATCC CAGGAGGAGG AAATTATCCA AAACCTCCAG TAGAATGCCT TCCTAAC TTC
661 CCGATCCAAC CATCTTTGAC CTTCAGAGGT AGAAATGACT CGCATAAACT GAAAACTTT
721 ATCTCCGAAA TAATGTTAAA CATGTCTATG ATATCTTGGC CGAATGATGC CAGTCGTATT
781 GTGTACTGCA GAAGACATTT ATTAACCCCT GCTGCTCAGT GGGCTAATGA CTTTGTACAA
841 GAACAAGGTA TACTTGAAAT AACATTGCAC ACATTCATAC AAGGATTATA TCAGCATTTT
901 TATAAGCCAC CAGATATCAA TAAAATCTTT AATGCAATCA CGCAACTTTC CGAATAAAA
961 CTTGGTATTG AGCGTCTCAA CCAACGATTC AGAAAGATTT GGGACAGAAT GCCACCAGAC
1021 TTCATGACCG AAAAAGCTGC CATAATGACA TATACTAGGC TATTGACAAA GGAAACCTAT
1081 AATATTGTCA GAATGCACAA ACCAGAGACA TTAAAAGACG CCATGGAAGA GGCTTACCAG
1141 ACAACTGCAC TAACTGAAAG ATTCTTCCCA GGATTGGAAC TTGATGCTGA TGGAGACACT
1201 ATCATCGGTG CCACAACCCA CTTACAAGAA GAATACGACT CTGACTATGA TTCAGAAGAT
1261 AATCTGACCC AGAATGGATA CGTCCATACC GTAAGGACAA GAAGATCTTA CAATAAACCA
1321 ATGTCAAATC ATCGAAAACAG GAGAAATAAC AACCCATCTA GAGAAGAATG TATAAAAAAT
1381 CGGCTATGCT TCTATTGTAA GAAAGAGGGA CATCGCCTGA ACGAATGTAG AGCACGTAAG
1441 GCGAGTTCTA ACCGATCTTG ACCCGGCTGA ACATGAGGAT CACCCATGTC TGGCGTCGAC
1501 TCTAGAAACA TGAGGATCAC CCATGTCCGG GAGCTCGGAT CCACTAGTAA CGGCCGCCAG
1561 TGTGCTGGAA TTCTGCAGAT ATCCATCACA CTGGCGGCCG CTCGAGCATG CATCTAGAGG
1621 GCCGCATCAT GTAATTAGTT ATGTCACGCT TACATTCACG CCCTCCCCC ACATCCGCTC
1681 TAACCGAAAA GGAAGGAGTT AGACAACCTG AAGTCTAGGT CCCTATTTAT TTTTTTATAG
1741 TTATGTTAGT ATTAAGAACG TTATTTATAT TTCAAAATTT TCTTTTTTTT CTGTACAGAC
1801 GCGTGTACGC ATGTAACATT ATACTGAAAA CCTTGCTTGA GAAGGTTTTG GGACGCTCGA
1861 AGGCTTTAAT TTGCGGCCCT GCATTAATGA ATCGGCCAAC GCGCGGGGAG AGGCGGTTTG
1921 CGTATTGGGC GCTCTTCCGC TTCCTCGCTC ACTGACTCGC TCGGCTCGGT CGTTCGGCTG
1981 CGGCGAGCGG TATCAGCTCA CTCAAAGGCG GTAATACGGT TATCCACAGA ATCAGGGGAT
2041 AACGCAGGAA AGAACATGTG AGCAAAAGGC CAGCAAAAGC CCAGGAACCG TAAAAAGGCC
2101 GCGTTGCTGG CGTTTTTCCA TAGGCTCCGC CCCCTGACG AGCATCACAA AAATCGACGC
2161 TCAAGTCAGA GGTGGCGAAA CCCGACAGGA CTATAAAGAT ACCAGGCGTT TCCCCCTGGA
2221 AGCTCCCTCG TGCGCTCTCC TGTTCGACC CTGCCGCTTA CCGGATACCT GTCCGCCTTT
2281 CTCCTTCCG GAAGCGTGGC GCTTCTCAT AGCTCACGCT GTAGGTATCT CAGTTCGGTG
2341 TAGGTCGTTT GCTCCAAGCT GGGCTGTGTG CACGAACCC CCGTTCAGCC CGACCGCTGC
2401 GCCTTATCCG GTAACATATCG TCTTGAGTCC AACCCGGTAA GACACGACTT ATCGCCACTG
2461 GCAGCAGCCA CTGGTAACAG GATTAGCAGA GCGAGGTATG TAGGCGGTGC TACAGAGTTC
2521 TTGAAGTGGT GGCCTAATA CGGCTACACT AGAAGGACAG TATTTGGTAT CTGCGCTCTG
2581 CTGAAGCCAG TTACCTTCGG AAAAAGAGTT GGTAGCTCTT GATCCGGCAA ACAAACCACC
2641 GCTGGTAGCG GTGGTTTTTT TGTTTGCAAG CAGCAGATTA CGCGCAGAAA AAAAGGATCT
2701 CAAGAAGATC CTTGATCTT TCTTACGGGG TCTGACGCTC AGTGGAACGA AAACCTACGT
2761 TAAGGGATTT TGGTCATGAG ATTATCAAAA AGGATCTTCA CCTAGATCCT TTTAAATTA
2821 AAATGAAGTT TTAAATCAAT CTAAAGTATA TATGAGTAAA CTTGGTCTGA CAGTTACCAA
2881 TGCTTAATCA GTGAGGCACC TATCTCAGCG ATCTGTCTAT TTCGTTTATC CATAGTTGCC
2941 TGAATCCCG TCGTGTAGAT AACTACGATA CGGGAGCGCT TACCATCTGG CCCCAGTGCT
3001 GCAATGATAC CGCGAGACCC ACGCTACCG GCTCCAGATT TATCAGCAAT AAACCAGCCA
3061 GCCGGAAGGG CCGAGCGCAG AAGTGGTCTT GCAACTTTAT CCGCCTCCAT TCAGTCTATT
```

3121 AATTGTTGCC GGAAGCTAG AGTAAGTAGT TCGCCAGTTA ATAGTTTGCG CAACGTTGTT  
3181 GGCATTGCTA CAGGCATCGT GGTGTCACCTC TCGTCGTTTG GTATGGCTTC ATTCAGCTCC  
3241 GGTTCCCAAC GATCAAGGCG AGTTACATGA TCCCCCATGT TGTGCAAAAA AGCGGTTAGC  
3301 TCCTTCGGTC CTCCGATCGT TGTCAGAAGT AAGTTGGCCG CAGTGTTATC ACTCATGGTT  
3361 ATGGCAGCAC TGCATAATTC TCTTACTGTC ATGCCATCCG TAAGATGCTT TTCTGTGACT  
3421 GGTGAGTACT CAACCAAGTC ATTCTGAGAA TAGTGTATGC GGCGACCGAG TTGCTCTTGC  
3481 CCGGCGTCAA TACGGGATAA TAGTGTATCA CATAGCAGAA CTTTAAAAGT GCTCATCATT  
3541 GAAAACGTT CTTCGGGGCG AAAACTCTCA AGGATCTTAC CGCTGTTGAG ATCCAGTTTCG  
3601 ATGTAACCCA CTCGTGCACC CAACTGATCT TCAGCATCTT TTACTIONTAC CAGCGTTTCT  
3661 GGGTGAGCAA AAACAGGAAG GCAAAATGCC GCAAAAAAGG GAATAAGGGC GACACGGAAA  
3721 TGTTGAATAC TCATACTCTT CTTTTTTCAA TGGGTAATAA CTGATATAAT TAAATTGAAG  
3781 CTCTAATTTG TGAGTTTAGT ATACATGCAT TTACTIONTATA TACAGTTTTT TAGTTTTGCT  
3841 GGCCGCATCT TCTCAAAATG GCTTCCCAGC CTGCTTTTCT GTAACGTTCA CCTCTACCT  
3901 TAGCATCCCT TCCCTTTGCA AATAGTCCTC TTCCAACAAT AATAATGTCA GATCCTGTAG  
3961 AGACCACATC ATCCACGGTT CTATACTGTT GACCCAATGC GTCTCCCTTG TCATCTAAC  
4021 CCACACCGGG TGTCATAATC AACCAATCGT AACCTTCATC TCTTCCACCC ATGTCTCTTT  
4081 GAGCAATAAA GCCGATAACA AAATCTTTGT CGCTCTTCGC AATGTCAACA GTACCCTTAG  
4141 TATATTTCC AGTAGATAGG GAGCCCTTGC ATGACAATC TGCTAACATC AAAAGGCTC  
4201 TAGTTCTCTT TGTTACTTCT TCTGCCCGCT GCTTCAAACC GCTAACATA CCTGGCCCA  
4261 CCACACCGTG TGCATTGTA ATGTCTGCC ATTCTGCTAT TCTGTATACA CCCGCAGAGT  
4321 ACTGCAATTT GACTGTATTA CCAATGTCAG CAAATTTTCT GTCTTCAAG AGTAAAAAAT  
4381 TGTACTTGGC GGATAATGCC TTTAGCGGCT TAACTGTGCC CTCCATGGAA AAATCAGTCA  
4441 AGATATCCAC ATGTGTTTTT AGTAAACAAA TTTTGGGACC TAATGCTTCA ACTAECTCA  
4501 GTAATTCCTT GGTGGTACGA ACATCCAATG AAGCACACAA GTTTGTGTTG TTTTCGTGCA  
4561 TGATATTTAA TAGCTTGGCA GCAACAGGAC TAGGATGAGT AGCAGCACGT TCCTTATATG  
4621 TAGCTTTTCA CATGATTTAT CTTCGTTTCC TGCAGGTTTT TGTTCTGTGC AGTTGGGTTA  
4681 AGAATACTGG GCAATTTTCA GTTTCTTCAA CACTACATAT GCGTATATAT ACCAATCTAA  
4741 GTCGTGTGCTC CTTCTTCGT TCTTCTTCT GTTCCGAGAT TACCGAATCA AAAAAATTT  
4801 AAAGAAACCG AAATCAAAAA AAAGAATAAA AAAAAAATGA TGAATTGAAT TGAAAAGCTA  
4861 GCTTATCGAT GATAAGCTGT CAAAGATGAG AATTAATTC ACGGACTATA GACTATACTA  
4921 GATACTCCGT CTACTGTACG ATACACTTCC GCTCAGGTCC TTGTCTTTA ACGAGCCTT  
4981 ACCACTCTTT TGTTACTCTA TTGATCCAGC TCAGCAAAG CAGTGTGATC TAAGATTCTA  
5041 TCTTCGCGAT GTAGTAAAC TAGCTAGACC GAGAAAGAGA CTAGAAATGC AAAAGGCACT  
5101 TCTACAATGG CTGCCATCAT TATTATCCGA TGTGACGCTG CAGCTTCTCA ATGATATTCG  
5161 AATACGCTTT GAGGAGATAC AGCCTAATAT CCGACAACT GTTTTACAGA TTTACGATCG  
5221 TACTTGTTAC CCATCATTGA ATTTTGAACA TCCGAACCTG GGAGTTTTCC CTGAAACAGA  
5281 TAGTATATTT GAACCTGTAT AATAATATAT AGTCTAGCG TTTACGGAAG ACAATGTATG  
5341 TATTTCCGTT CCTGGAGAAA CTATTGCATC TATTGCATAG GTAATCTTGC ACGTCGCATC  
5401 CCCGGTTCAT TTTCTGCGTT TCCATCTTGC ACTTCAATAG CATATCTTTG TTAACGAAGC  
5461 ATCTGTGCTT CTTTTGTAG AACAAAAATG CAACGCGAGA GCGCTAATTT TTCAAACAAA  
5521 GAATCTGAGC TGCATTTTTA CAGAACAGAA ATGCAACGCG AAAGCGCTAT TTTACCAACG  
5581 AAGAATCTGT GCTTCATTTT TGTAACAAA AAATGCAACG CGACGAGAGC GCTAATTTTT  
5641 CAAACAAAGA ATCTGAGCTG CTTTTTTTACA GAACAGAAAT GCAACGCGAG AGCGCTATTT  
5701 TACCAACAAA GAATCTATAC TTCTTTTTTGT TTCTACAAAA ATGCATCCCG AGAGCGCTAT  
5761 TTTTCTAACA AAGCATCTTA GATTACTTTT TTTCTCCTTT GTGCGCTCTA TAATGCAGTC  
5821 TCTTGATAAC TTTTTGCACT GTAGGTCCGT TAAGGTAGA AGAAGGCTAC TTTGGTGTCT  
5881 ATTTTCTCTT CCATAAAAA AGCCTGACTC CACTTCCCG GTTTACTGAT TACTAGCGAA  
5941 GCTGCGGGTG CTTTTTTTCA AGATAAAGGC ATCCCGATT ATATTCTATA CCGATGTGGA  
6001 TTGCGCATAA TTTGTGAACA GAAAGTGATA GCGTTGATGA TTCTTCAATG GTCAGAAAAT  
6061 TATGAACGGT TTCTTCTATT TTGTCTCTAT ATACTACGTA TAGGAAATGT TTCATTTTT  
6121 GTATTGTTTT CGATTCACTC TATGAATAGT TCTTACTACA ATTTTTTTGT CTAAAGAGTA  
6181 ATACTAGAGA TAAACATAAA AAATGTAGAG GTCGAGTTA GATGCAAGTT CAAGGAGCGA  
6241 AAGGTGGATG GGTAGGTTAT ATAGGGATAT AGCACAGAGA TATATAGCAA AGAGATACTT  
6301 TTGAGCAATG TTTGTGGAAG CGGTATTCGC AATGGGAAGC TCCACCCCGG TTGATAATCA  
6361 GAAAAGCCCC AAAAAACAGGA AGATTGTATA AGCAAAATAT TAAATTGTAA ACGTTAATAT



6421 TTTGTTAAAA TTCGCGTTAA ATTTTTGTTA AATCAGCTCA TTTTTTAACG AATAGCCCGA  
6481 AATCGGCAAA ATCCCTTATA AATCAAAAGA ATAGACCGAG ATAGGGTTGA GTGTTGTTCC  
6541 AGTTTCCAAC AAGAGTCCAC TATTAAAGAA CGTGGACTCC AACGTCAAAG GCGAAAAAG  
6601 GGTCTATCAG GCGGATGGCC CACTACGTGA ACCATCACCC TAATCAAGTT TTTTGGGGTC  
6661 GAGGTGCCGT AAAGCAGTAA ATCGGAAGGG TAAACGGATG CCCCATTTA GAGCTTGACG  
6721 GGGAAAGCCG GCGAACGTGG CGAGAAAGGA AGGGAAGAAA GCGAAAGGAG CGGGGGCTAG  
6781 GCGGGTGGGA AGTGTAGGGG TCACGCTGGG CGTAACCACC ACACCCGCCG CGCTTAATGG  
6841 GCGCTACAG GCGCGTGGG GATGATCCAC TAGT

//

|              |                        |                                                                                                                                                                                                                                             |     |          |             |
|--------------|------------------------|---------------------------------------------------------------------------------------------------------------------------------------------------------------------------------------------------------------------------------------------|-----|----------|-------------|
| LOCUS        | pNB3027                | 7211 bp                                                                                                                                                                                                                                     | DNA | circular | 15-JUN-2012 |
| FEATURES     | Location/Qualifiers    |                                                                                                                                                                                                                                             |     |          |             |
| misc_feature | 1..393                 | /note="GAL1 promoter"                                                                                                                                                                                                                       |     |          |             |
| misc_feature | 2493..3066             | /note="pUC origin"                                                                                                                                                                                                                          |     |          |             |
| misc_feature | complement(3211..4071) | /note="Amp Resistance Gene"                                                                                                                                                                                                                 |     |          |             |
| misc_feature | complement(4089..5196) | /note="URA3 gene"                                                                                                                                                                                                                           |     |          |             |
| misc_feature | 5200..6671             | /note="2 micron origin"                                                                                                                                                                                                                     |     |          |             |
| misc_feature | complement(6739..7194) | /note="f1 origin"                                                                                                                                                                                                                           |     |          |             |
| misc_feature | 516..523               | /note="5' PBS"                                                                                                                                                                                                                              |     |          |             |
| misc_feature | 396..406               | /note="start of transcription "                                                                                                                                                                                                             |     |          |             |
| misc_feature | 396..446               | /note="R"                                                                                                                                                                                                                                   |     |          |             |
| misc_feature | 447..513               | /note="U5"                                                                                                                                                                                                                                  |     |          |             |
| misc_feature | 589..1209              | /note="Capsid"                                                                                                                                                                                                                              |     |          |             |
| CDS          | 589..1209              | /note=""                                                                                                                                                                                                                                    |     |          |             |
|              |                        | /translation="MSFMDQIPGGGNYPKLPVECLPNFPPIQPSLTFRGRNDSHKLKNF<br>ISEIMLNMSMISWPNDASRIVYCRRHLLNPAAQWANDFVQEQGILEITFDTFIQGLYQ<br>HFYKPPDINKIFNAITQLSEAKLGIERLNQFRKIWDRMPPDFMTEKAAIMTYTRLLT<br>KETYNIVRMHKPETLKDAMEEAYQTTALTERFFPGFELDADGDITIIG" |     |          |             |
| misc_feature | 1210..1287             | /note=""                                                                                                                                                                                                                                    |     |          |             |
| CDS          | 1210..1287             | /note=""                                                                                                                                                                                                                                    |     |          |             |
|              |                        | /translation="ATTHLQEEYDSYDSEDNLTQNGYVH"                                                                                                                                                                                                    |     |          |             |
| misc_feature | 1288..1461             | /note="Nucleocapsid"                                                                                                                                                                                                                        |     |          |             |
| CDS          | 1288..1461             | /note=""                                                                                                                                                                                                                                    |     |          |             |
|              |                        | /translation="TVRTRRSYNKPM SNHRNRRNNNPSREECIKNRLCFYCKKEGHRL<br>NECRARKASSNRS"                                                                                                                                                               |     |          |             |
| misc_feature | 1963..2210             | /note="CYC terminator"                                                                                                                                                                                                                      |     |          |             |
| misc_feature | 2130..2136             | /note="transcription end"                                                                                                                                                                                                                   |     |          |             |
| misc_feature | 1467..1512             | /note="U3"                                                                                                                                                                                                                                  |     |          |             |
| misc_feature | 1467..1512             | /note="POL3"                                                                                                                                                                                                                                |     |          |             |
| misc_feature | 1519..1574             | /note="MS2"                                                                                                                                                                                                                                 |     |          |             |
| misc_feature | 1583..1755             | /note="U3"                                                                                                                                                                                                                                  |     |          |             |
| misc_feature | 1691..1703             | /note="3' PBSA"                                                                                                                                                                                                                             |     |          |             |

```

misc_feature      1707..1718
                  /note="3' PBSB"
misc_feature      1756..1806
                  /note="R"
misc_feature      1764..1767
                  /note="mapped end of transcript 1"
misc_feature      1785..1787
                  /note="mapped end of transcript 2"
misc_feature      1797..1799
                  /note="mapped end of transcript 3"
misc_feature      1804..1806
                  /note="mapped end of transcript 4"
misc_feature      1807..1873
                  /note="U5"
source            1..7211
                  /dnas_title="pNB3027"

```

ORIGIN

```

  1  ACGGATTAGA  AGCCGCCGAG  CGGGTGACAG  CCCTCCGAAG  GAAGACTCTC  CTCGGTGCCT
 61  CCTCGTCTTC  ACCGGTCGCG  TTCCTGAAAC  GCAGATGTGC  CTCGCGCCGC  ACTGCTCCGA
121  ACAATAAAGA  TTCTACAATA  CTAGCTTTTA  TGGTTATGAA  GAGGAAAAAT  TGGCAGTAAC
181  CTGGCCCCAC  AAACCTTCAA  ATGAACGAAT  CAAATTAACA  ACCATAGGAT  GATAATGCGA
241  TTAGTTTTTT  AGCCTTATTT  CTGGGGTAAT  TAATCAGCGA  AGCGATGATT  TTTGATCTAT
301  TAACAGATAT  ATAAATGCAA  AAACCTGCATA  ACCACTTTAA  CTAATACTTT  CAACATTTTC
361  GGTTCGTATT  ACTTCTTATT  CAAATGTAAT  AAAGATAAGT  AACATTCCGT  GAATTAATCT
421  GATAAACTGT  TTTGACAAC  GGTACTTCC  CTAAGACTGT  TTATATTAGG  ATTGTCAAGA
481  CACTCCGGTA  TTACTIONG  CCGTAATACA  ACACCTGGTA  GCGTTAAAGG  TTACTIONG
541  TTCAAACGAA  CCATCGAAAA  GCCGAACCTA  GCTACACCAC  ACCCCAGTAT  GAGCTTTATG
601  GATCAAATCC  CAGGAGGAGG  AAATTATCCA  AAACCTCCAG  TAGAATGCCT  TCCTAACTTC
661  CCGATCCAAC  CATCTTTGAC  CTTCCAGAGG  AGAAATGACT  CGCATAAACT  GAAAACTTT
721  ATCTCCGAAA  TAATGTTAAA  CATGTCTATG  ATATCTTGGC  CGAATGATGC  CAGTCGTATT
781  GTGTACTGCA  GAAGACATTT  ATTAACCC  GCTGCTCAGT  GGGCTAATGA  CTTTGTACAA
841  GAACAAGGTA  TACTTGAAAT  AACATTTCGAC  ACATTCATAC  AAGGATTATA  TCAGCATTTT
901  TATAAGCCAC  CAGATATCAA  TAAAATCTTT  AATGCAATCA  CGCAACTTTC  CGAAGCTAAA
961  CTTGGTATTG  AGCGTCTCAA  CCAACGATTC  AGAAAGATTT  GGGACAGAAT  GCCACCAGAC
1021  TTCATGACCG  AAAAAGCTGC  CATAATGACA  TATACTAGGC  TATTGACAAA  GGAAACCTAT
1081  AATATTGTCA  GAATGCACAA  ACCAGAGACA  TTAAAAGACG  CCATGGAAGA  GGCTTACCAG
1141  ACAACTGCAC  TAACTGAAA  ATTCTTCCCA  GGATTTCGAC  TTGATGCTGA  TGGAGACACT
1201  ATCATCGGTG  CCACAACCCA  CTTACAAGAA  GAATACGACT  CTGACTATGA  TTCAGAAGAT
1261  AATCTGACCC  AGAATGGATA  CGTCCATACC  GTAAGGACAA  GAAGATCTTA  CAATAAACCA
1321  ATGTCAAATC  ATCGAAAAC  GAGAAATAAC  AACCCATCTA  GAGAAGAATG  TATAAAAAAT
1381  CGGCTATGCT  TCTATTGTAA  GAAAGAGGGA  CATCGCCTGA  ACGAATGTAG  AGCACGTAAG
1441  GCGAGTTCTA  ACCGATCTTG  ACCCGGTGTT  GTATCTCAA  ATGAGATATG  TCAGTATGAC
1501  AATACGTCAC  CCGGCTGAAC  ATGAGGATCA  CCCATGTCTG  CGGTCGACTC  TAGAAACATG
1561  AGGATCACCC  ATGTCCGGGT  GAACGTTTCA  AAAACACATA  TGAAACAACC  TTATAACAAA
1621  ACGAACAACA  TGAGACAAAA  CCCGACCTTC  CCTAGCTGAA  CTACCCAAAG  TATAAATGCC
1681  TGAACAATTA  GTTTAGATCC  GAGATTCCGC  GCTTCCACCA  CTTAGTATGA  TTCATATTTT
1741  ATATAATATA  TAAGATAAGT  AACATTCCGT  GAATTAATCT  GATAAACTGT  TTTGACAAC
1801  GGTACTTCC  CTAAGACTGT  TTATATTAGG  ATTGTCAAGA  CACTCCGGTA  TTAGCTGAGC
1861  CCGTAATACA  ACAGGATCCA  CTAGTAACGG  CCGCCAGTGT  GCTGGAATTC  TGCAGATATC
1921  CATCACACTG  CCGGCCGCTC  GAGCATGCAT  CTAGAGGGCC  GCATCATGTA  ATTAGTTATG
1981  TCACGCTTAC  ATTCACGCCC  TCCCCCACA  TCCGCTCTAA  CCGAAAAGGA  AGGAGTTAGA
2041  CAACCTGAAG  TCTAGGTCCC  TATTTATTTT  TTTATAGTTA  TGTTAGTATT  AAGAACGTTA
2101  TTTATATTTT  AAATTTTCT  TTTTTTTCTG  TACAGACGCG  TGTACGCATG  TAACATTATA
2161  CTGAAAACCT  TGCTTGAGAA  GGTTTTGGGA  CGCTCGAAGG  CTTTAATTTG  CGGCCCTGCA
2221  TTAATGAATC  GGCCAACGCG  CGGGGAGAGG  CGGTTTGCCT  ATTGGGCGCT  CTTCCGCTTC

```

2281 CTCGCTCACT GACTCGCTGC GCTCGGTCGT TCGGCTGCGG CGAGCGGTAT CAGCTCACTC  
2341 AAAGGCGGTA ATACGGTTAT CCACAGAATC AGGGGATAAC GCAGGAAAGA ACATGTGAGC  
2401 AAAAGGCCAG CAAAAGCCCA GGAACCGTAA AAAGGCCGCG TTGCTGGCGT TTTTCCATAG  
2461 GCTCCGCCCC CCTGACGAGC ATCACAAAAA TCGACGCTCA AGTCAGAGGT GGC GAAACCC  
2521 GACAGGACTA TAAAGATACC AGGCGTTTCC CCCTGGAAGC TCCCTCGTGC GCTCTCCTGT  
2581 TCCGACCCTG CCGCTTACCG GATACCTGTC CGCCTTCTC CTTTCGGGAA GCGTGGCGCT  
2641 TTCTCATAGC TCACGCTGTA GGTATCTCAG TTCGGGTGTAG GTCGTTTCGCT CCAAGCTGGG  
2701 CTGTGTGCAC GAACCCCCCG TTCAGCCCGA CCGCTGCGCC TTATCCGGTA ACTATCGTCT  
2761 TGAGTCCAAC CCGGTAAGAC ACGACTTATC GCCACTGGCA GCAGCCACTG GTAACAGGAT  
2821 TAGCAGAGCG AGGTATGTAG GCGGTGCTAC AGAGTTCTTG AAGTGGTGGC CTAACACGG  
2881 CTACACTAGA AGGACAGTAT TTGGTATCTG CGCTCTGCTG AAGCCAGTTA CCTTCGAAAA  
2941 AAGAGTTGGT AGCTCTTGAT CCGGCAAACA AACCACCGCT GGTAGCGGTG GTTTTTTTGT  
3001 TTGCAAGCAG CAGATTACGC GCAGAAAAAA AGGATCTCAA GAAGATCCTT TGATCTTTTC  
3061 TACGGGGTCT GACGCTCAGT GGAACGAAAA CTCACGTTAA GGGATTTTGG TCATGAGATT  
3121 ATCAAAAAGG ATCTTCACCT AGATCCTTTT AAATTA AAAA TGAAGTTTTA AATCAATCTA  
3181 AAGTATATAT GAGTAAACTT GGTCTGACAG TTACCAATGC TTAATCAGTG AGGCACCTAT  
3241 CTCAGCGATC TGTCTATTTT GTTCATCCAT AGTTGCCTGA CTCCCCGTCG TGTAGATAAC  
3301 TACGATACCG GAGCGCTTAC CATCTGGCCC CAGTCTGCA ATGATACCGC GAGACCCACG  
3361 CTCACCGGCT CCAGATTTAT CAGCAATAAA CCAGCCAGCC GGAAGGGCCG AGCGCAGAAG  
3421 TGGTCCTGCA ACTTTATCCG CCTCCATTCA GTCTATTAAT TGTTGCCGGG AAGCTAGAGT  
3481 AAGTAGTTCG CCAGTTAATA GTTTGCGCAA CGTTGTTGGC ATTGCTACAG GCATCGTGGT  
3541 GTCACTCTCG TCGTTTGGTA TGGCTTCATT CAGCTCCGGT TCCCAACGAT CAAGCGAGT  
3601 TACATGATCC CCCATGTTGT GCAAAAAGC GGTTAGCTCC TTCGGTCTC CGATCGTTGT  
3661 CAGAAGTAAG TTGGCCGCAG TGTATCACT CATGGTTATG GCAGCACTGC ATAATTCTCT  
3721 TACTGTATG CCATCCGTAA GATGCTTTTC TGTGACTGGT GAGTACTCAA CCAAGTCATT  
3781 CTGAGAATAG TGTATGCGGC GACCGAGTTG CTCTTGCCCC GCGTCAATAC GGGATAATAG  
3841 TGTATCACAT AGCAGAACTT TAAAAGTGCT CATCATTTGA AAACGTTCTT CGGGGCGAAA  
3901 ACTCTCAAGG ATCTTACCGC TGTTGAGATC CAGTTCGATG TAACCCACTC GTGCACCCAA  
3961 CTGATCTTCA GCATCTTTTA CTTTACCAG CGTTTCTGGG TGAGCAAAAA CAGGAAGGCA  
4021 AAATGCCGCA AAAAAGGGAA TAAGGGCGAC ACGGAAATGT TGAATACTCA TACTCTTCCT  
4081 TTTTCAATGG GTAATAACTG ATATAATTAA ATTGAAGCTC TAATTTGTGA GTTTAGTATA  
4141 CATGCATTTA CTTATAATAC AGTTTTTTAG TTTTGTGGC CGCATCTTCT CAAATATGCT  
4201 TCCCAGCCTG CTTTTCTGTA ACGTTCACCC TCTACCTTAG CATCCCTTCC CTTTGCAAAT  
4261 AGTCCTCTTC CAACAATAAT AATGTCAGAT CCTGTAGAGA CCACATCATC CACGGTTCTA  
4321 TACTGTTGAC CCAATGCGTC TCCCTTGTC TCTAAACCCA CACCGGGTGT CATAATCAAC  
4381 CAATCGTAAC CTTTCTCTCT TCCACCCATG TCTCTTTGAG CAATAAAGCC GATAACAAAA  
4441 TCTTTGTGCG TCTTCGCAAT GTCAACAGTA CCCTTAGTAT ATTCTCCAGT AGATAGGGAG  
4501 CCCTTGATG ACAATTCTGC TAACATCAA AGGCCTCTAG GTTCCTTTGT TACTTCTTCT  
4561 GCCGCTGCT TCAAACCGCT AACAATACCT GGGCCCACCA CACCGTGTGC ATTCGTAATG  
4621 TCTGCCATT CTGCTATTCT GTATACACCC GCAGAGTACT GCAATTTGAC TGTATTACCA  
4681 ATGTCAGCAA ATTTTCTGTC TTCGAAGAGT AAAAAATTGT ACTTGGCGGA TAATGCCTTT  
4741 AGCGGCTTAA CTGTGCCCTC CATGGAAAAA TCAGTCAAGA TATCCACATG TGTTTTTAGT  
4801 AAACAAATTT TGGGACCTAA TGCTTCAACT AACTCCAGTA ATTCCTTGGT GGTACGAACA  
4861 TCCAATGAAG CACACAAGTT TGTTTGCTTT TCGTGCATGA TATTAATAG CTTGGCAGCA  
4921 ACAGGACTAG GATGAGTAGC AGCACGTTCC TTATATGTAG CTTTCGACAT GATTTATCTT  
4981 CGTTTCCTGC AGGTTTTTGT TCTGTGCAGT TGGGTAAAGA ATACTGGGCA ATTTTCTTCT  
5041 TCTTCAACAC TACATATGCG TATATATACC AATCTAAGT TGTGCTCCTT CCTTCGTTCT  
5101 TCCTTCTGTT CGGAGATTAC CGAATCAAAA AAATTTCAA GAAACCGAAA TCAAAAAAAA  
5161 GAAATAAAAA AAAATGATGA ATTGAATTGA AAAGCTAGCT TATCGATGAT AAGCTGTCAA  
5221 AGATGAGAAT TAATTCCACG GACTATAGAC TATACTAGAT ACTCCGTCTA CTGTAGATA  
5281 CACTTCCGCT CAGGTCCCTG TCCTTTAACG AGGCCTTACC ACTCTTTTGT TACTCTATTG  
5341 ATCCAGCTCA GCAAAGGCAG TGTGATCTAA GATTCTATCT TCGCGATGTA GTAAAACCTAG  
5401 CTAGACCGAG AAAGAGACTA GAAATGCAAA AGGCACTTCT ACAATGGCTG CCATCATTAT  
5461 TATCCGATGT GACGCTGCAG CTTCTCAATG ATATTGGAAT ACGCTTTGAG GAGATACAGC  
5521 CTAATATCCG ACAAACCTGTT TTACAGATTT ACGATCGTAC TTGTTACCCA TCATTGAATT

5581 TTGAACATCC GAACCTGGGA GTTTTCCCTG AAACAGATAG TATATTTGAA CCTGTATAAT  
5641 AATATATAGT CTAGCGCTTT ACGGAAGACA ATGTATGTAT TTCGGTTCCT GGAGAAACTA  
5701 TTGCATCTAT TGCATAGGTA ATCTTGCACG TCGCATCCCC GGTTCATTTT CTGCGTTTCC  
5761 ATCTTGCAC TCAATAGCAT ATCTTTGTTA ACGAAGCATC TGTGCTTCAT TTTGTAGAAC  
5821 AAAAATGCAA CGCGAGAGCG CTAATTTTTT AAACAAAGAA TCTGAGCTGC ATTTTTACAG  
5881 AACAGAAATG CAACGCGAAA GCGCTATTTT ACCAACGAAG AATCTGTGCT TCATTTTTGT  
5941 AAAACAAAAA TGCAACGCGA CGAGAGCGCT AATTTTTCAA ACAAAGAATC TGAGCTGCAT  
6001 TTTTACAGAA CAGAAATGCA ACGCGAGAGC GCTATTTTAC CAACAAAGAA TCTATACTTC  
6061 TTTTTTGTTC TACAAAAATG CATCCCGAGA GCGCTATTTT TCTAACAAAG CATCTTAGAT  
6121 TACTTTTTTT CTCTTTGTG CGCTCTATAA TGCAGTCTCT TGATAACTTT TTGCACTGTA  
6181 GGTCCGTAA GGTTAGAAGA AGGCTACTTT GGTGTCTATT TTCTCTCCA TAAAAAAGC  
6241 CTGACTCCAC TTCCCGCGTT TACTGATTAC TAGCGAAGCT GCGGGTGCAT TTTTCAAGA  
6301 TAAAGGCATC CCCGATTATA TTCTATACCG ATGTGGATTG CGCATACTTT GTGAACAGAA  
6361 AGTGATAGCG TTGATGATTC TTCATTGGTC AGAAAAATAT GAACGGTTTC TTCTATTTG  
6421 TCTCTATATA CTACGTATAG GAAATGTTTA CATTTTCGTA TTGTTTTCGA TTCACTCTAT  
6481 GAATAGTTCT TACTACAATT TTTTTGTCTA AAGAGTAATA CTAGAGATAA ACATAAAAAA  
6541 TGTAGAGGTC GAGTTTAGAT GCAAGTTCAA GGAGCGAAAG GTGGATGGGT AGGTATATA  
6601 GGGATATAGC ACAGAGATAT ATAGCAAAGA GATACTTTT AGCAATGTTT GTGGAAGCGG  
6661 TATTCGCAAT GGGAAAGCTC ACCCCGGTTG ATAATCAGAA AAGCCCCAAA AACAGGAAGA  
6721 TTGTATAAGC AAATATTTAA ATTGTAACG TTAATATTTT GTTAAAATTC GCGTTAAATT  
6781 TTTGTTAAAT CAGCTCATT TTTAACGAAT AGCCCGAAAT CGGCAAAATC CCTTATAAAT  
6841 CAAAAGAATA GACCGAGATA GGGTTGAGTG TTGTTCCAGT TTCCAACAAG AGTCCACTAT  
6901 TAAAGAACGT GGACTCCAAC GTCAAAGGGC GAAAAAGGGT CTATCAGGGC GATGGCCCAC  
6961 TACGTGAACC ATCACCTAA TCAAGTTTTT TGGGGTCGAG GTGCCGTAAA GCAGTAAATC  
7021 GGAAGGGTAA ACGGATGCC CCATTTAGAG CTTGACGGGG AAAGCCGGCG AACGTGGCGA  
7081 GAAAGGAAGG GAAGAAAAGC AAAGGAGCG GGGCTAGGGC GGTGGGAAGT GTAGGGGTCA  
7141 CGCTGGGCGT AACCACCACA CCCGCCGCG TTAATGGGGC GCTACAGGGC GCGTGGGGAT  
7201 GATCCACTAG T

//
